# Supplementary material
Source: PubMed Central journal article supplement (PMC3094498)
Supplement: NIHMS283571-supplement-1_si_001.pdf [file NIHMS283571-supplement-1_si_001.pdf]

# Supporting Information

## Spectra

### **Protecting Group-Free Glycoligation by the Desulfurative Rearrangement of Allylic Disulfides as a Means of Assembly of Oligosaccharide Mimetics**

*Venkataraman Subramanian,<sup>a</sup> Myriame Moumé-Pymbock,<sup>a</sup> Tianshun Hu,<sup>a</sup> and David Crich<sup>a,b,\*</sup>*

- a) Department of Chemistry, Wayne State University, 5101 Cass Avenue, Detroit, MI 48202, and
- b) Centre de Recherche de Gif, Institut de Chimie des Substances Naturelles, CNRS, Avenue de la Terrasse, 91198 Gif-sur-Yvette, France

## Table of Contents

|                                                                                                                                                    | <sup>1</sup> H | <sup>13</sup> C |
|----------------------------------------------------------------------------------------------------------------------------------------------------|----------------|-----------------|
| <b>Preparation of glucosyl and laminaribiosyl sulfenyl donors 13 and 14 (Scheme 2)</b>                                                             |                |                 |
| 2-(2-Pyridyldithio)-3-butenyl β-D-glucopyranoside ( <b>13</b> )                                                                                    | S-6            | S-7             |
| 4-Hydroxy-but-2-Z-enyl hepta- <i>O</i> -acetyl-β-D-laminaribioside ( <b>8</b> ).                                                                   | S-8            | S-9             |
| 4-(Phenyloxythionocarbonyloxy)-2-Z-butenyl hepta- <i>O</i> -acetyl-β-D-laminaribioside ( <b>10</b> ).                                              | S-10           | S11             |
| 2-(Phenyloxycarbonylthioxy)-3-butenyl tetra- <i>O</i> -acetyl-β-D-laminaribioside ( <b>12</b> ).                                                   | S-12           | S-13            |
| 2-(2-Pyridyldithio)-3-butenyl β-D-laminaribioside ( <b>14</b> ).                                                                                   | S-14           | S-15            |
| <b>Alternative Preparation of glucosyl sulfenyl donor 13 (Scheme 3)</b>                                                                            |                |                 |
| 4-(4-Nitrophenyloxythionocarbonyloxy)-2-Z-butenyl tetra- <i>O</i> -acetyl-β-D-glucopyranoside ( <b>15</b> ).                                       | S-16           | S-17            |
| 4-[ <i>N</i> -(2-Azidoethyl)- <i>N</i> -(benzyl)thionocarbamoyloxy]-2-Z-butenyl 2,3,4,6-tetra- <i>O</i> -acetyl-β-D-glucopyranoside ( <b>16</b> ). | S-18           | S-19            |
| 2-[ <i>N</i> -(2-Azidoethyl)- <i>N</i> -(benzyl)carbamoylethoxy]-3-butenyl 2,3,4,6-tetra- <i>O</i> -acetyl-β-D-glucopyranoside ( <b>17</b> ).      | S-20           | S-21            |
| 2-[ <i>N</i> -(2-Azidoethyl)- <i>N</i> -(benzyl)carbamoylethoxy]-3-butenyl β-D-glucopyranoside ( <b>18</b> ).                                      | S-22           | S-23            |
| 2-(2-Pyridyldithio)-3-butenyl β-D-glucopyranoside ( <b>13</b> ).                                                                                   |                |                 |
| <b>Preparation of the <i>N</i>-Acetylglucosamine-derived sulfenyl donor 22 (Scheme 4)</b>                                                          |                |                 |
| 2-(Phenyloxycarbonylthioxy)-3-butenyl 2-acetamido-3,4,6-tri- <i>O</i> -acetyl-2-deoxy-β-D-glucopyranoside ( <b>21</b> ).                           | S-24           | S-25            |
| 2-(2-Pyridyldithio)-3-butenyl 2-acetamido-2-deoxy-β-D-glucopyranoside ( <b>22</b> ).                                                               | S-26           | S-27            |
| <b>Preparation of the sulfenyl donor 31 (Scheme 5)</b>                                                                                             |                |                 |
| 4-(2-Naphthylmethoxy)-2-Z-butene-1-ol ( <b>23</b> ).                                                                                               | S-28           | S-29            |
| 1,2:5,6-Di- <i>O</i> -isopropylidene-3- <i>O</i> -4-(2-naphthylmethoxy)-2-Z-butenyl-α-D-glucofuranose ( <b>24</b> ).                               | S-30           | S-31            |
| 1,2,4,6-Tetra- <i>O</i> -acetyl-3- <i>O</i> -[4-(2-naphthylmethoxy)-2-Z-butenyl]-D-α,β-glucopyranose ( <b>25</b> ).                                | S-32           | S-33            |
| 2,4,6-Tri- <i>O</i> -acetyl-3- <i>O</i> -[4-(2-naphthylmethoxy)-2-Z-butenyl]-α-D-glucopyranosyl trichloroacetimidate ( <b>26</b> ).                | S-34           | S-35            |
| Methyl 2,4,6-tri- <i>O</i> -acetyl-3- <i>O</i> -[4-(2-naphthylmethoxy)-2-Z-butenyl]-β-D-glucopyranoside ( <b>27</b> ).                             | S-36           | S-37            |
| Methyl 2,4,6-tri- <i>O</i> -acetyl-3- <i>O</i> -[4-hydroxy-2-Z-butenyl]-β-D-glucopyranoside ( <b>28</b> ).                                         | S-38           | S-39            |
| Methyl 2,4,6-tri- <i>O</i> -acetyl-3- <i>O</i> -[4-(phenyloxythionocarbonyloxy)-2-Z-butenyl]-β-D-glucopyranoside ( <b>29</b> ).                    | S-40           | S-41            |
| Methyl 2,4,6-tri- <i>O</i> -acetyl-3- <i>O</i> -[(2-phenyloxycarbonylthioxy)-3-butenyl]-β-D-glucopyranoside ( <b>30</b> ).                         | S-42           | S-43            |

|                                                                                                                                                       |      |      |
|-------------------------------------------------------------------------------------------------------------------------------------------------------|------|------|
| Methyl 3- <i>O</i> -[(2-pyridyldithio)-3-butenyl]- $\beta$ -D-glucopyranoside (31).                                                                   | S-44 | S-45 |
| <b>Preparation of Monosaccharyl Thiol Precursors (Scheme 6)</b>                                                                                       |      |      |
| Methyl 6-acetylthio- $\alpha$ -D-glucopyranoside (32)                                                                                                 | S-46 | S-47 |
| Methyl 2-acetamido-6-acetylthio-2-deoxy- $\beta$ -D-glucopyranoside (33).                                                                             | S-48 | S-49 |
| 2,4,6-Tri- <i>O</i> -acetyl-3-acetylthio- $\alpha,\beta$ -D-glucopyranose (35).                                                                       | S-50 | S-51 |
| 2,4,6-Tri- <i>O</i> -acetyl-3-acetylthio- $\alpha$ -D-glucopyranosyl trichloroacetimidate (36).                                                       | S-52 | S-53 |
| Methyl 2,4,6-tri- <i>O</i> -acetyl-3-acetylthio- $\beta$ -D-glucopyranoside (37).                                                                     | S-54 | S-55 |
| <b>Ligation of Monosaccharyl Sulfenyl Donors and Thiols (Table 1).</b>                                                                                |      |      |
| Methyl 6-[4-( $\beta$ -D-glucopyranosyloxy)-2- <i>E</i> -butenyl]-thio- $\alpha$ -D-glucopyranoside (40).                                             | S-56 | S-57 |
| Methyl 6-[4-(2-acetamido-2-deoxy- $\beta$ -D-glucopyranosyloxy)-2- <i>E</i> -butenyl]-thio-2-deoxy- $\beta$ -D-glucopyranoside (41).                  | S-58 | S-59 |
| Methyl 6-[4-(2-acetamido-2-deoxy- $\beta$ -D-glucopyranosyloxy)-2- <i>E</i> -butenyl]-thio-2-acetamido-2-deoxy- $\beta$ -D-glucopyranoside (42).      | S-60 | S-61 |
| Methyl 3-deoxy-3-[4-( $\beta$ -D-glucopyranosyloxy)but-2- <i>E</i> -enylthio]- $\beta$ -D-glucopyranoside (43).                                       | S-62 | S-63 |
| Methyl 3- <i>O</i> -[4-(1-thio- $\beta$ -D-glucopyranosyl)-2- <i>E</i> -butenyl]- $\beta$ -D-glucopyranoside (44).                                    | S-64 | S-65 |
| Methyl 3- <i>O</i> -[4-(methyl $\alpha$ -D-glucopyranosid-6-thio)but-2- <i>E</i> -enyl]- $\beta$ -D-glucopyranoside (45).                             | S-66 | S-67 |
| Phenyl 3-deoxy-3-[4-( $\beta$ -D-glucopyranosyloxy)but-2- <i>E</i> -enylthio]-1-thio- $\beta$ -D-glucopyranoside (46).                                | S-68 | S-69 |
| <b>Preparation of 2-Azido-2-deoxy glucose-based Monosaccharide Units (Scheme 9)</b>                                                                   |      |      |
| Phenyl 2-azido-2-deoxy-3,4- <i>O</i> -(2,3-dimethoxybutane-2,3-diyl)-1-thio- $\beta$ -D-glucopyranoside (48).                                         | S-70 | S-71 |
| Methyl 2-azido-2-deoxy-3,4- <i>O</i> -(2,3-dimethoxybutane-2,3-diyl)- $\beta$ -D-glucopyranoside (55).                                                | S-72 | S-73 |
| Phenyl 2-azido-2-deoxy-3,4- <i>O</i> -(2,3-dimethoxybutane-2,3-diyl)-1-thio-6- <i>O</i> - <i>p</i> -toluenesulfonyl- $\beta$ -D-glucopyranoside (73). | S-74 | S-75 |
| Phenyl 2-azido-2-deoxy-6-acetylthio-3,4- <i>O</i> -(2,3-dimethoxybutane-2,3-diyl)-1-thio- $\beta$ -D-glucopyranoside (74).                            | S-76 | S-77 |
| Phenyl 6-acetylthio-2-azido-2-deoxy-3,4- <i>O</i> -(2,3-dimethoxybutane-2,3-diyl)-1-thio- $\beta$ -D-glucopyranoside <i>S</i> -Oxide (54).            | S-78 | S-79 |
| Phenyl 2-azido-2-deoxy-3,4,6-tri- <i>O</i> -( <i>p</i> -methoxybenzyl)-1-thio- $\beta$ -D-glucopyranoside (75).                                       | S-80 | S-81 |
| Phenyl 2-azido-2-deoxy-3,4,6-tri- <i>O</i> -( <i>p</i> -methoxybenzyl)-1-thio- $\beta$ -D-glucopyranoside <i>S</i> -Oxide (47).                       | S-82 | S-83 |
| <b>Preparation of 2-Deoxy-2-(trichloroethoxycarbonylamino)glucose-Based Monosaccharyl Units (Scheme 10)</b>                                           |      |      |
| Phenyl 3,4,6-tri- <i>O</i> -acetyl-2-deoxy-1-thio-2-(2,2,2-trichloroethoxycarbonylamino)- $\beta$ -D-glucopyranoside (77).                            | S-84 | S-85 |
| Methyl 3,4,6-tri- <i>O</i> -acetyl-2-(2,2,2-trichloroethoxycarbonylamino)-2-                                                                          | S-86 | S-87 |

|                                                                                                                                                                                                                      |       |       |
|----------------------------------------------------------------------------------------------------------------------------------------------------------------------------------------------------------------------|-------|-------|
| deoxy- $\beta$ -D-glucopyranoside ( <b>79</b> ).                                                                                                                                                                     |       |       |
| Methyl 3,4- <i>O</i> -(2,3-dimethoxybutane-2,3-diyl)-2-(2,2,2-trichloroethoxycarbonylamino)-2-deoxy- $\beta$ -D-glucopyranoside ( <b>81</b> ).                                                                       | S-88  | S-89  |
| Phenyl 3,4,6- <i>O</i> -acetyl-2-deoxy-1-thio-2-(2,2,2-trichloroethoxycarbonylamino)- $\beta$ -D-glucopyranoside <i>S</i> -Oxide ( <b>78</b> ).                                                                      | S-90  | S-91  |
| Phenyl 2-deoxy-3,4- <i>O</i> -(2,3-dimethoxybutane-2,3-diyl)-1-thio-2-(2,2,2-trichloroethoxycarbonylamino)- $\beta$ -D-glucopyranoside ( <b>83</b> ).                                                                | S-92  | S-93  |
| Phenyl 2-deoxy-3,4- <i>O</i> -(2,3-dimethoxybutane-2,3-diyl)-1-thio-6- <i>O</i> - <i>p</i> -toluenesulfonyl-2-(2,2,2-trichloroethoxycarbonylamino)- $\beta$ -D-glucopyranoside ( <b>57</b> ).                        | S-94  | S-95  |
| <b>Preparation of the Azidoglucose-Based Disaccharyl Sulfenyl Donor 53 (Scheme 7)</b>                                                                                                                                |       |       |
| Phenyl 2-azido-2-deoxy-3,4- <i>O</i> -(2,3-dimethoxybutane-2,3-diyl)-1-thio-2'-azido-2'-deoxy-3',4',6'-tri- <i>O</i> -( <i>p</i> -methoxybenzyl)]- $\beta$ -D-gentiobioside ( <b>49</b> ).                           | S-96  | S-97  |
| Phenyl 2-azido-2-deoxy-3,4- <i>O</i> -(2,3-dimethoxybutane-2,3-diyl)-1-thio-[2'-azido-2'-deoxy-3',4',6'-tri- <i>O</i> -( <i>p</i> -methoxybenzyl)]- $\beta$ -D-gentiobioside <i>S</i> -Oxide ( <b>50</b> ).          | S-98  | S-99  |
| 2-(Phenyloxycarbonylthioxy-but-3-enyl 2-azido-2-deoxy-3,4- <i>O</i> -(2,3-dimethoxybutane-2,3-diyl)-[2'-azido-2'-deoxy-3',4',6'-tri- <i>O</i> -( <i>p</i> -methoxybenzyl)]- $\beta$ -D-gentiobioside ( <b>51</b> ).  | S-100 | S-101 |
| 2-(Phenyloxycarbonylthioxy)but-3-enyl 2,2'-diazido-2,2'-dideoxy- $\beta$ -D-gentiobioside ( <b>52</b> ).                                                                                                             | S-102 | S-103 |
| 2-(Pyridyldithio)but-3-enyl 2,2'-diazido-2,2'-dideoxy- $\beta$ -D-gentiobioside ( <b>53</b> ).                                                                                                                       | S-104 | S-105 |
| <b>Preparation of the Azidoglucose Based Disaccharyl Thiol Precursor 56 (Scheme 8)</b>                                                                                                                               |       |       |
| Methyl 2,2'-diazido-2,2'-dideoxy-6'-acetylthio- $\beta$ -D-gentiobioside ( <b>56</b> ).                                                                                                                              | S-106 | S-107 |
| <b>Preparation of the <i>N</i>-Troc Glucosamine-based Disaccharyl Sulfenyl Donor 62 (Scheme 11)</b>                                                                                                                  |       |       |
| Phenyl 3',4',6'-tri- <i>O</i> -acetyl-2,2'-dideoxy-3,4- <i>O</i> -(2,3-dimethoxybutan-2,3-diyl)-1-thio-2,2'-bis(2,2,2-trichloroethoxycarbonylamino)- $\beta$ -D-gentiobioside ( <b>84</b> ).                         | S-108 | S-109 |
| 2-(Phenyloxycarbonylthioxy)but-3-enyl 3',4',6'-tri- <i>O</i> -acetyl-2,2'-dideoxy-3,4- <i>O</i> -(2,3-dimethoxybutan-2,3-diyl)-2,2'-bis(2,2,2-trichloroethoxycarbonylamino)- $\beta$ -D-gentiobioside ( <b>85</b> ). | S-110 | S-111 |
| 2-(Phenyloxycarbonylthioxy)but-3-enyl 3',4',6'-tri- <i>O</i> -acetyl-2,2'-dideoxy-2,2'-bis(2,2,2-trichloroethoxycarbonylamino)- $\beta$ -D-gentiobioside ( <b>86</b> ).                                              | S-112 | S-113 |
| 2-(2-Pyridyldithio)but-3-enyl 2,2'-dideoxy-2,2'-bis(2,2,2-trichloroethoxycarbonylamino)- $\beta$ -D-gentiobioside ( <b>62</b> ).                                                                                     | S-114 | S-115 |
| <b>Preparation of the <i>N</i>-Troc Glucosamine Based Disaccharyl Thiol Precursor 61 (Scheme 8)</b>                                                                                                                  |       |       |
| Methyl 2,2'-dideoxy-3,4;3',4'-di- <i>O</i> -(2,3-dimethoxybutan-2,3-diyl)-2,2'-bis(2,2,2-trichloroethoxycarbonylamino)-6'- <i>O</i> - <i>p</i> -toluenesulfonyl- $\beta$ -D-gentiobioside ( <b>59</b> ).             | S-116 | S-117 |

|                                                                                                                                                                                                                                   |       |       |
|-----------------------------------------------------------------------------------------------------------------------------------------------------------------------------------------------------------------------------------|-------|-------|
| Methyl 6'-acetylthio-2,2'-dideoxy-3,4;3',4'-di- <i>O</i> -(2,3-dimethoxybutan-2,3-diyl)-2,2'-bis(2,2,2-trichloroethoxycarbonylamino)- $\beta$ -D-gentiobioside ( <b>60</b> ).                                                     | S-118 | S-119 |
| Methyl 2,2'-dideoxy-2,2'-bis(2,2,2-trichloroethoxycarbonylamino)-6'-acetylthio- $\beta$ -D-gentiobioside ( <b>61</b> ).                                                                                                           | S-120 | S-121 |
| <b>Preparation of the Laminaribiosyl 3'-Sulfenyl Donor 63 (Scheme 12)</b>                                                                                                                                                         |       |       |
| 3- <i>O</i> -{2,4,6-Tri- <i>O</i> -acetyl-3- <i>O</i> -[4-(2-naphthylmethyloxy)but-2- <i>Z</i> -enyl]- $\beta$ -D-glycopyranosyl}-1,2:5,6-di- <i>O</i> -isopropylidene- $\alpha$ -D-glucofuranose ( <b>87</b> ).                  | S-122 | S-123 |
| 2,2',4,4',6,6'-Hexa- <i>O</i> -acetyl-3'- <i>O</i> -[4-(2-naphthylmethyloxy)but-2- <i>Z</i> -enyl]- $\alpha$ -D-laminaribiosyl trichloroacetimidate ( <b>89</b> ).                                                                | S-124 | S-125 |
| Methyl 2,2',4,4',6,6'-hexa- <i>O</i> -acetyl-3'- <i>O</i> -[4-(2-naphthylmethyloxy)but-2- <i>Z</i> -enyl]- $\beta$ -D-laminaribioside ( <b>90</b> ).                                                                              | S-126 | S-127 |
| Methyl 2,2',4,4',6,6'-hexa- <i>O</i> -acetyl-3'- <i>O</i> -[4-hydroxybut-2- <i>Z</i> -enyl]- $\beta$ -D-laminaribioside ( <b>91</b> ).                                                                                            | S-128 | S-129 |
| Methyl 2,2',4,4',6,6'-hexa- <i>O</i> -acetyl-3'- <i>O</i> -[4-(phenyloxythionocarbonyloxy)but-2- <i>Z</i> -enyl]- $\beta$ -D-laminaribioside ( <b>92</b> ).                                                                       | S-130 | S-131 |
| Methyl 2,2',4,4',6,6'-hexa- <i>O</i> -acetyl-3'- <i>O</i> -[2-phenyloxythionocarbonyloxy]but-3-enyl]- $\beta$ -D-laminaribioside ( <b>93</b> ).                                                                                   | S-132 | S-133 |
| Methyl 3'- <i>O</i> -(2-pyridin-2-ylthio)-but-3-enyl- $\beta$ -D-laminaribioside ( <b>63</b> ).                                                                                                                                   | S-134 | S-135 |
| <b>Preparation of the Laminaribiosyl-1-thiol 65 (Scheme 13)</b>                                                                                                                                                                   |       |       |
| 1-Thio-hepta- <i>O</i> -acetyl- $\beta$ -D-laminaribiose ( <b>65</b> ).                                                                                                                                                           | S-136 | S-137 |
| <b>Preparation of the Laminaribiosyl-3'-thiol Precursor 64 (Scheme 14)</b>                                                                                                                                                        |       |       |
| Benzyl 2- <i>O</i> -benzoyl-4,6- <i>O</i> -benzylidene-2',4',6'-tri- <i>O</i> -acetyl-3'-acetylthio- $\beta$ -D-laminaribioside ( <b>95</b> ).                                                                                    | S-138 | S-139 |
| Benzyl 2- <i>O</i> -benzoyl-2',4',6'-tri- <i>O</i> -acetyl-3'-acetylthio- $\beta$ -D-laminaribioside ( <b>64</b> ).                                                                                                               | S-140 | S-141 |
| <b>Ligation of Disaccharyl Sulfenyl Donors and Thiols (Table 2).</b>                                                                                                                                                              |       |       |
| Methyl 6-[4- <i>O</i> -(2,2'-azido-2,2'-dideoxy- $\beta$ -D-gentiobiosyloxy)but-2- <i>E</i> -enyl]thio-2,2'-azido-2,2'-dideoxy- $\alpha$ -D-gentiobioside ( <b>66</b> ).                                                          | S-142 | S-143 |
| Methyl 6-[4- <i>O</i> -(2,2'-dideoxy-2,2'-(2,2,2-trichloroethoxycarbonylamino)- $\beta$ -D-gentiobiosyloxy)but-2- <i>E</i> -enyl]thio-2,2'-dideoxy-(2,2,2-trichloroethoxycarbonylamino)- $\alpha$ -D-gentiobioside ( <b>67</b> ). | S-144 | S-145 |
| Benzyl 3-deoxy-3-[4-( $\beta$ -D-laminaribiosyloxy)but-2- <i>E</i> -enylthio]- $\beta$ -D-laminaribioside ( <b>68</b> ).                                                                                                          | S-146 | S-147 |
| Methyl 3- <i>O</i> -[4-(1-thio- $\beta$ -D-laminaribiosyl)but-2- <i>E</i> -enyl]- $\beta$ -D-laminaribioside ( <b>69</b> ).                                                                                                       | S-148 | S-149 |
| 4-(1-Thio- $\beta$ -D-laminaribiosyl)but-2- <i>E</i> -enyl $\beta$ -D-laminaribioside ( <b>70</b> ).                                                                                                                              | S-150 | S-151 |

$^1\text{H-NMR}$  spectrum ( $\text{CD}_3\text{OD}$ , 500 MHz) of 2-(2-Pyridyldithio)-3-butenyl  $\beta$ -D-glucopyranoside (**13**)

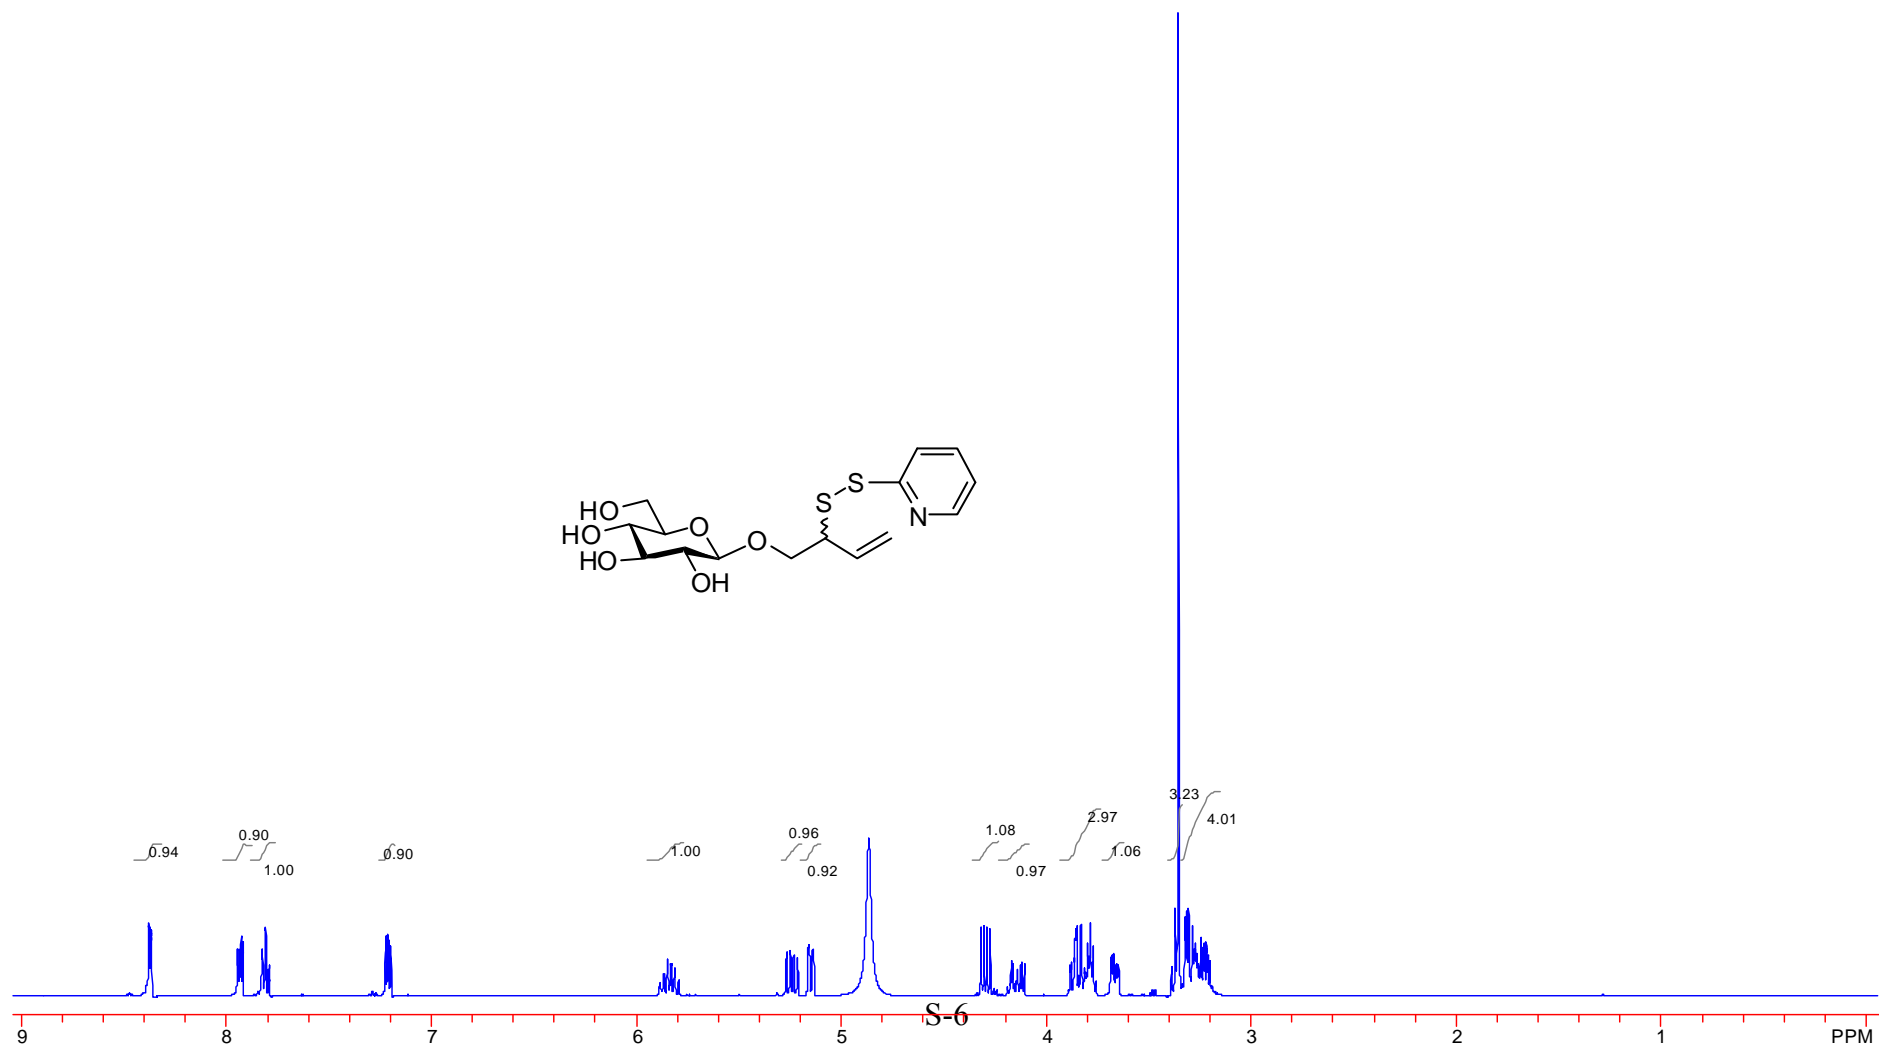

$^{13}\text{C}$ -NMR spectrum ( $\text{CD}_3\text{OD}$ , 125 MHz) of 2-(2-Pyridyldithio)-3-butenyl  $\beta$ -D-glucopyranoside (**13**)

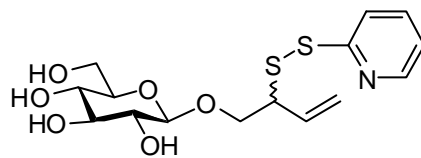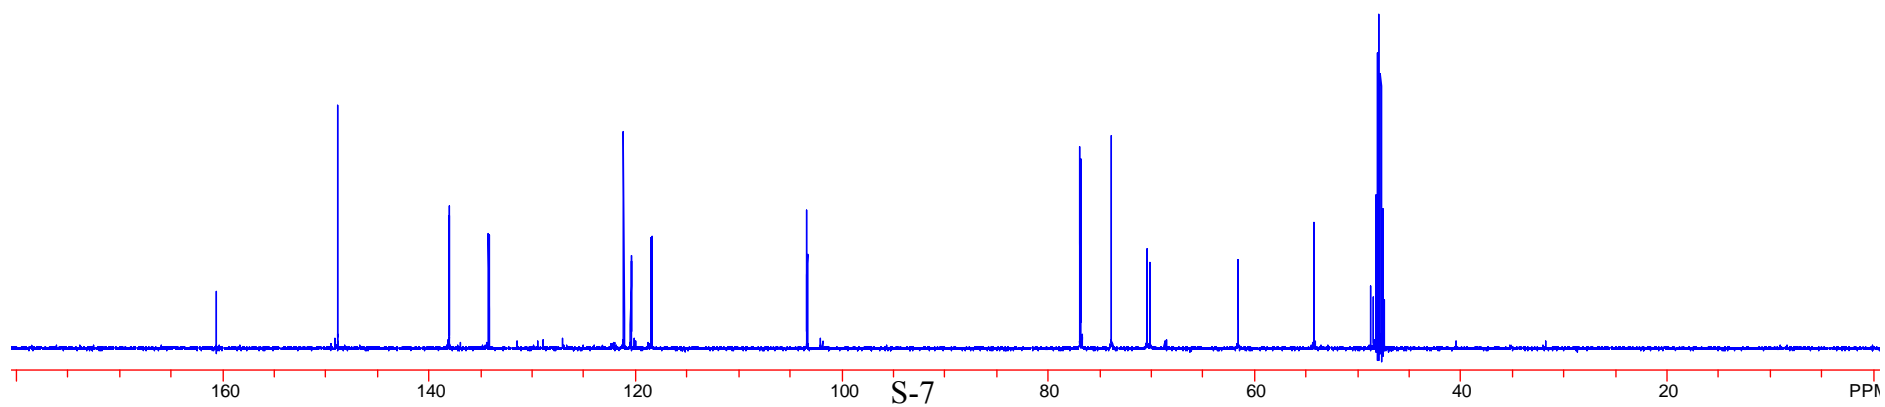

$^1\text{H-NMR}$  spectrum ( $\text{CDCl}_3$ , 500 MHz) of 4-Hydroxy-but-2Z-enyl hepta-*O*-acetyl- $\beta$ -D-laminaribioside (**8**).

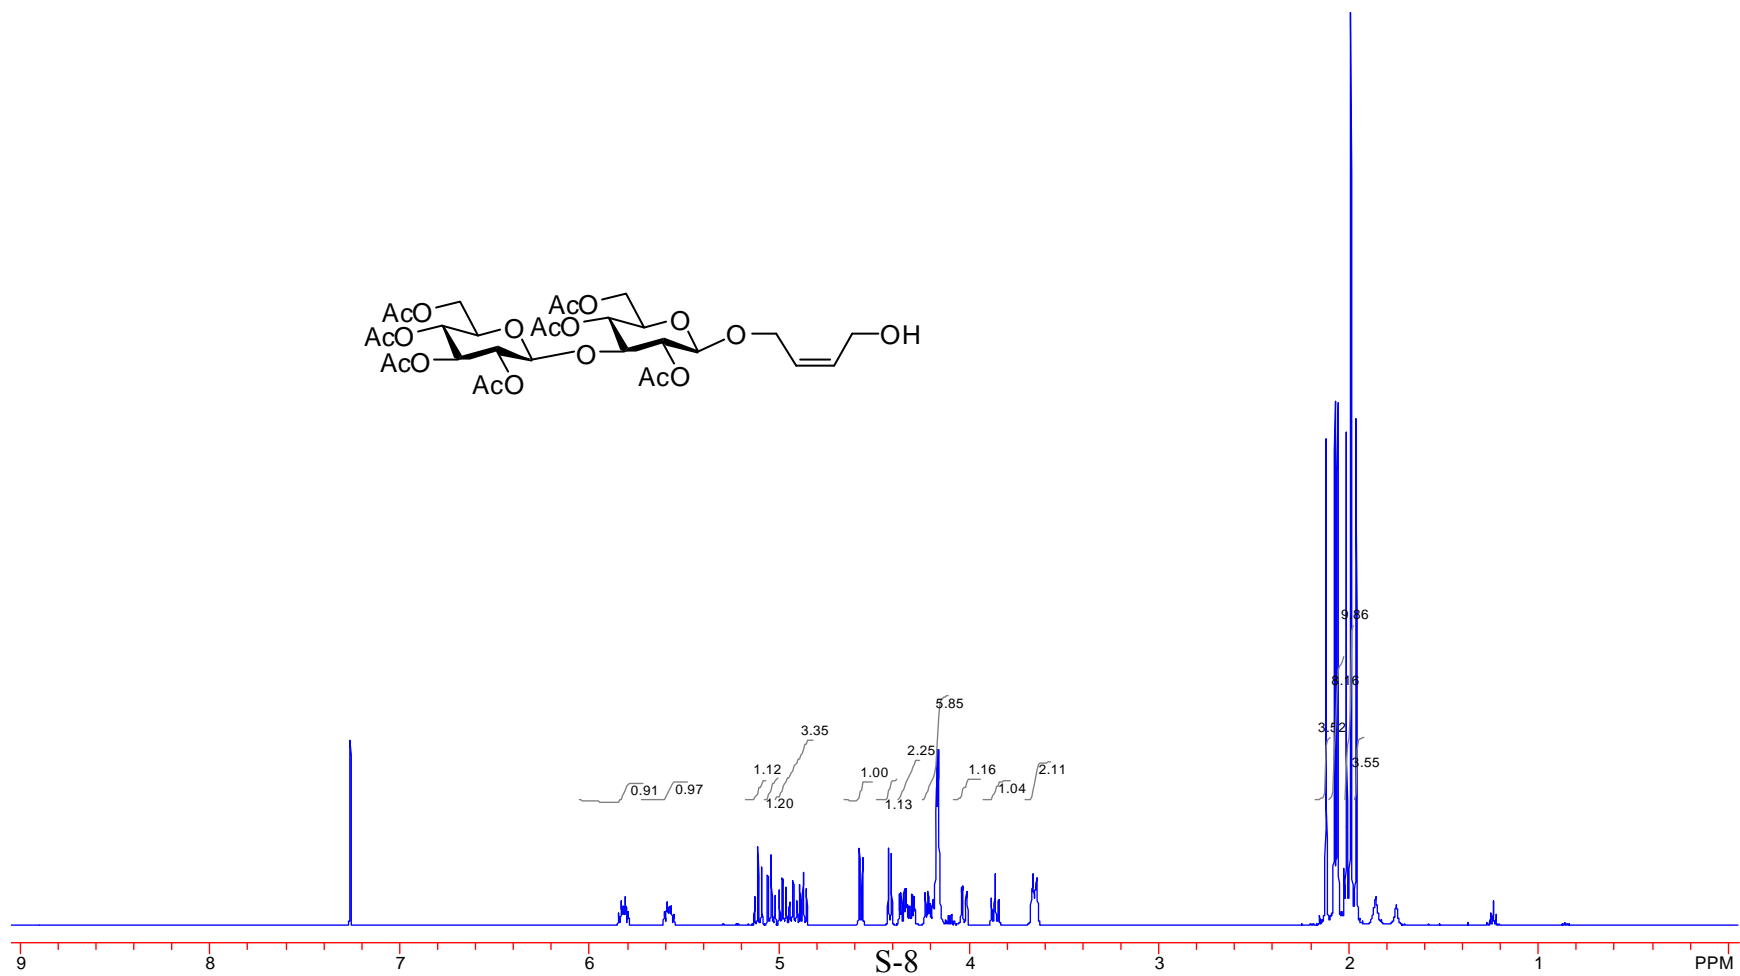



$^{13}\text{C}$ -NMR spectrum ( $\text{CD}_3\text{OD}$ , 125 MHz) of 4-Hydroxy-but-2Z-enyl hepta-*O*-acetyl- $\beta$ -D-laminaribioside (**8**).

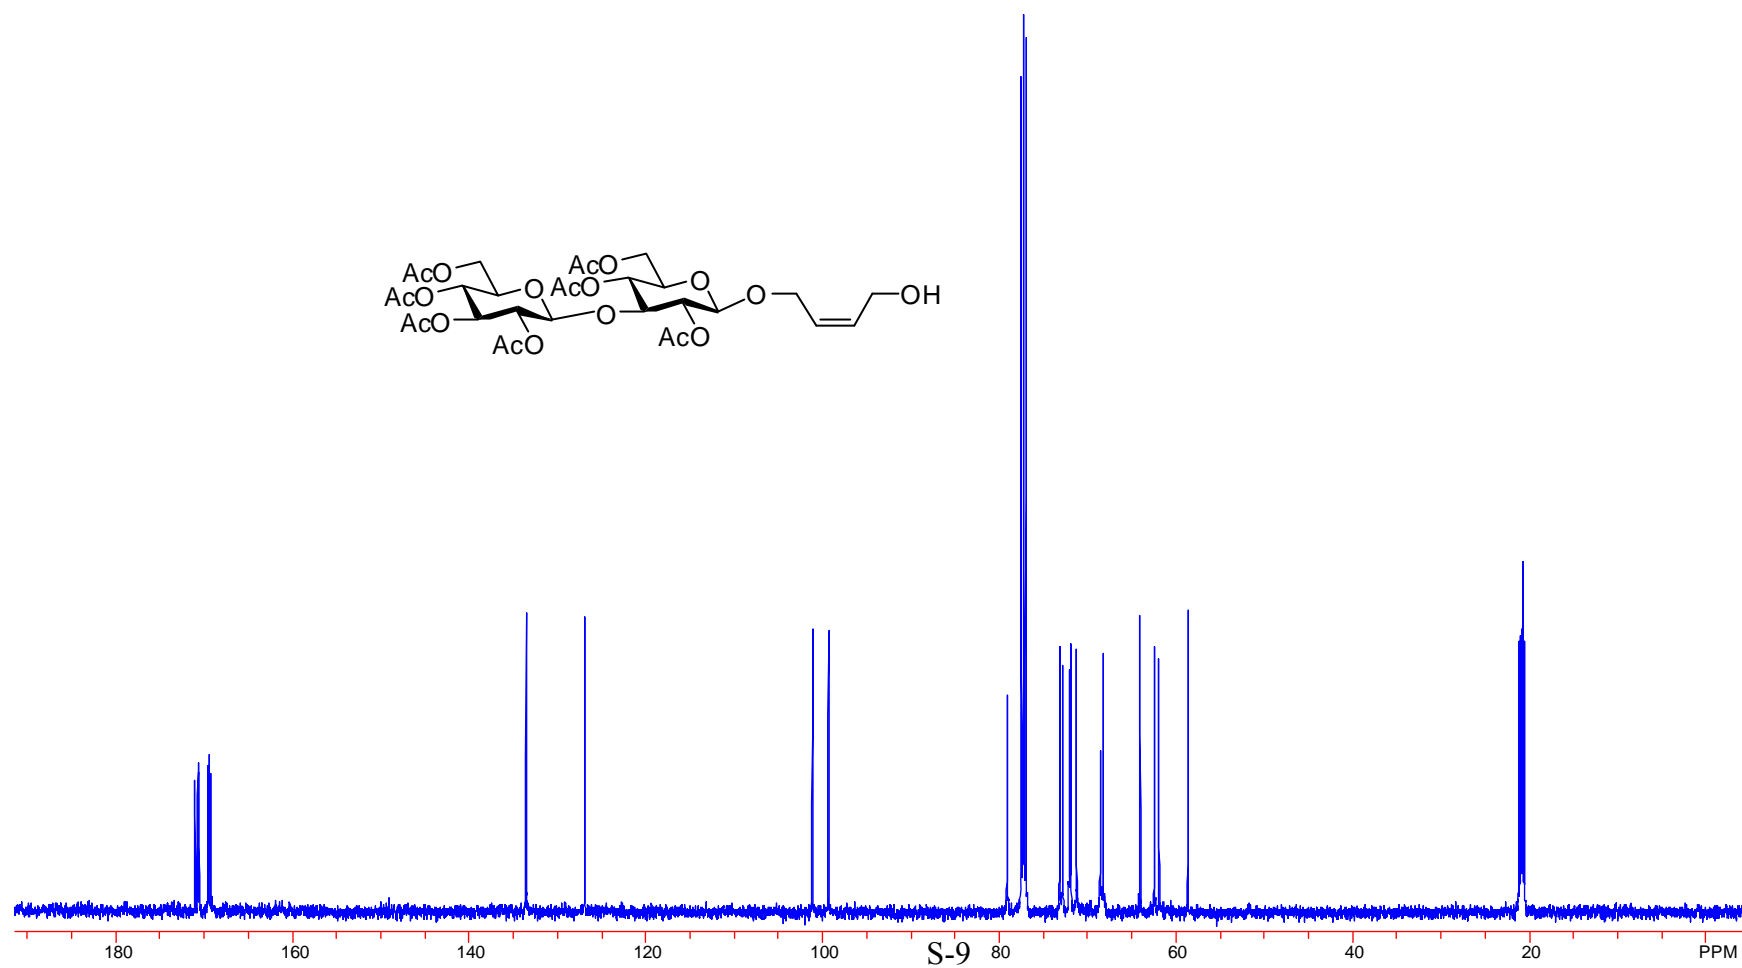

$^1\text{H-NMR}$  spectrum ( $\text{CDCl}_3$ , 500 MHz) of 4-(Phenyloxythionocarbonyloxy)-2Z-butenyl hepta-*O*-acetyl- $\beta$ -D-laminaribioside (**10**).

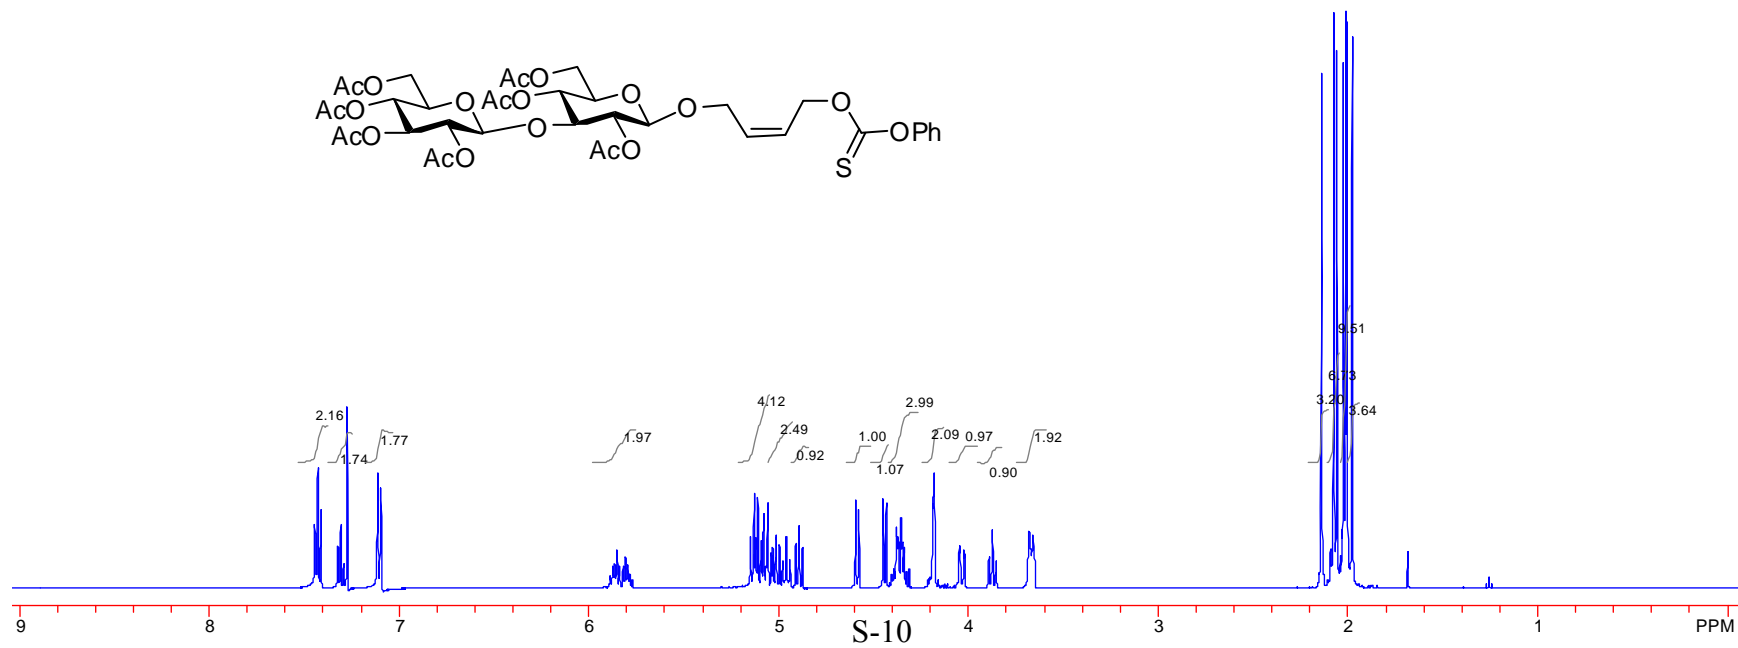

$^{13}\text{C}$ -NMR spectrum ( $\text{CDCl}_3$ , 125 MHz) of 4-(Phenyloxythionocarbonyloxy)-2Z-butenyl hepta-O-acetyl- $\beta$ -D-laminaribioside (**10**).

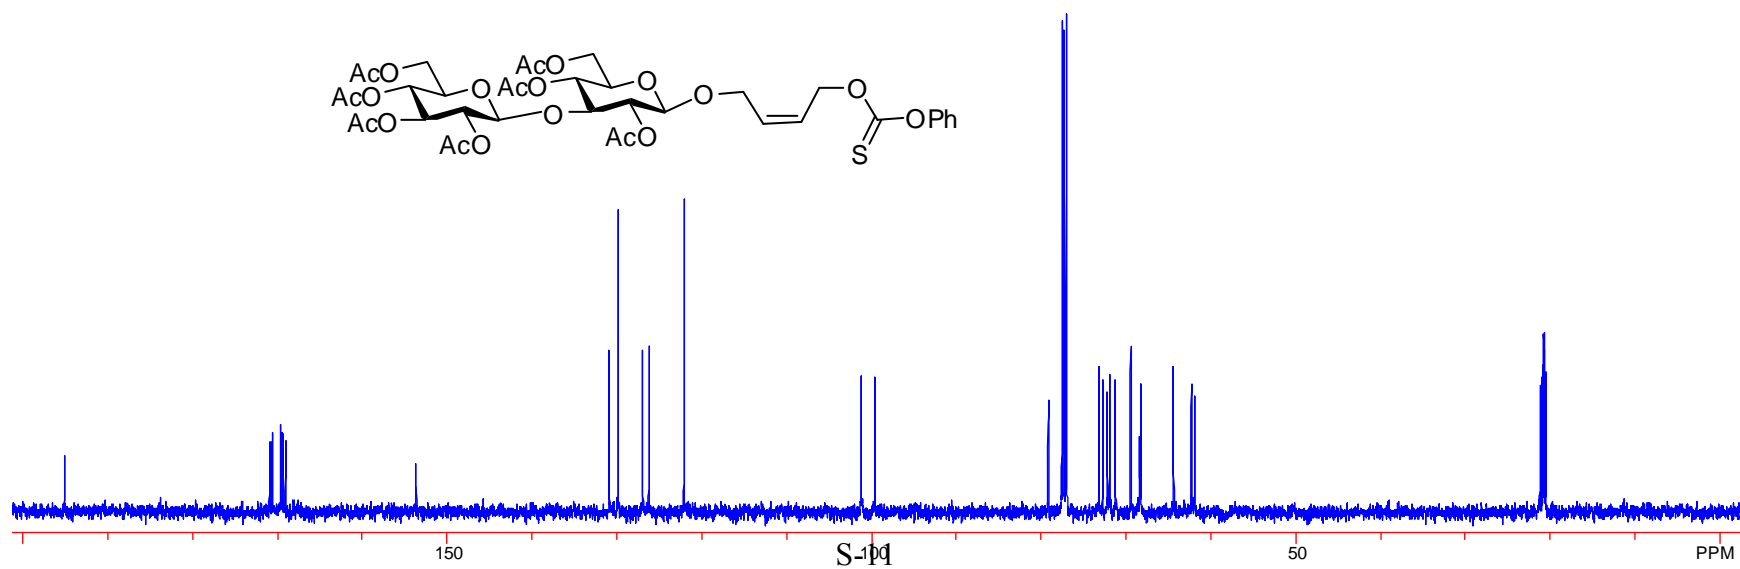

$^1\text{H-NMR}$  spectrum ( $\text{CDCl}_3$ , 500 MHz) of 2-(Phenyloxycarbonylthioxy)-3-butenyl tetra-*O*-acetyl- $\beta$ -D-laminaribioside (**12**).

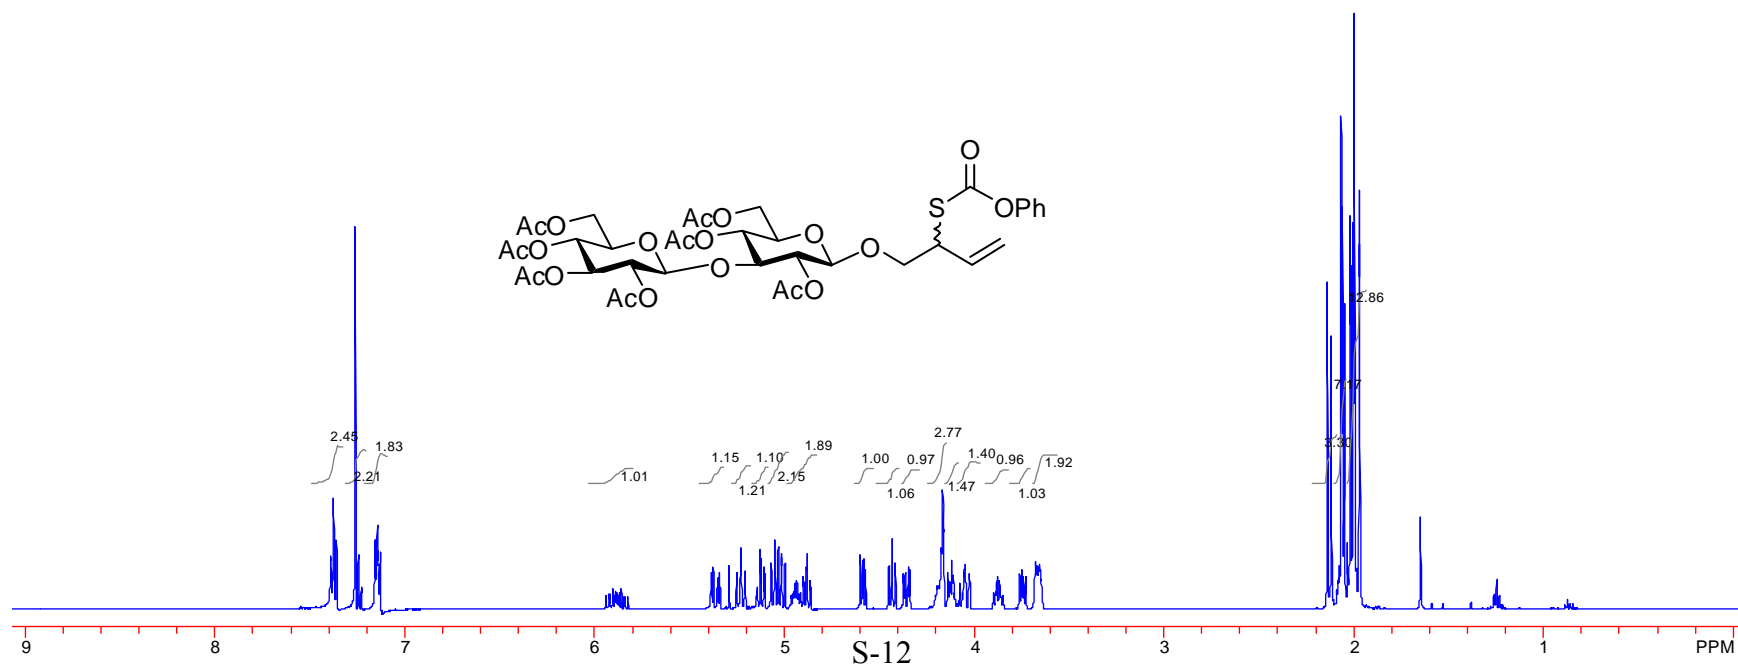

$^{13}\text{C}$ -NMR spectrum ( $\text{CDCl}_3$ , 125 MHz) of 2-(Phenyloxycarbonylthioxy)-3-butenyl tetra-*O*-acetyl- $\beta$ -D-laminaribioside (**12**).

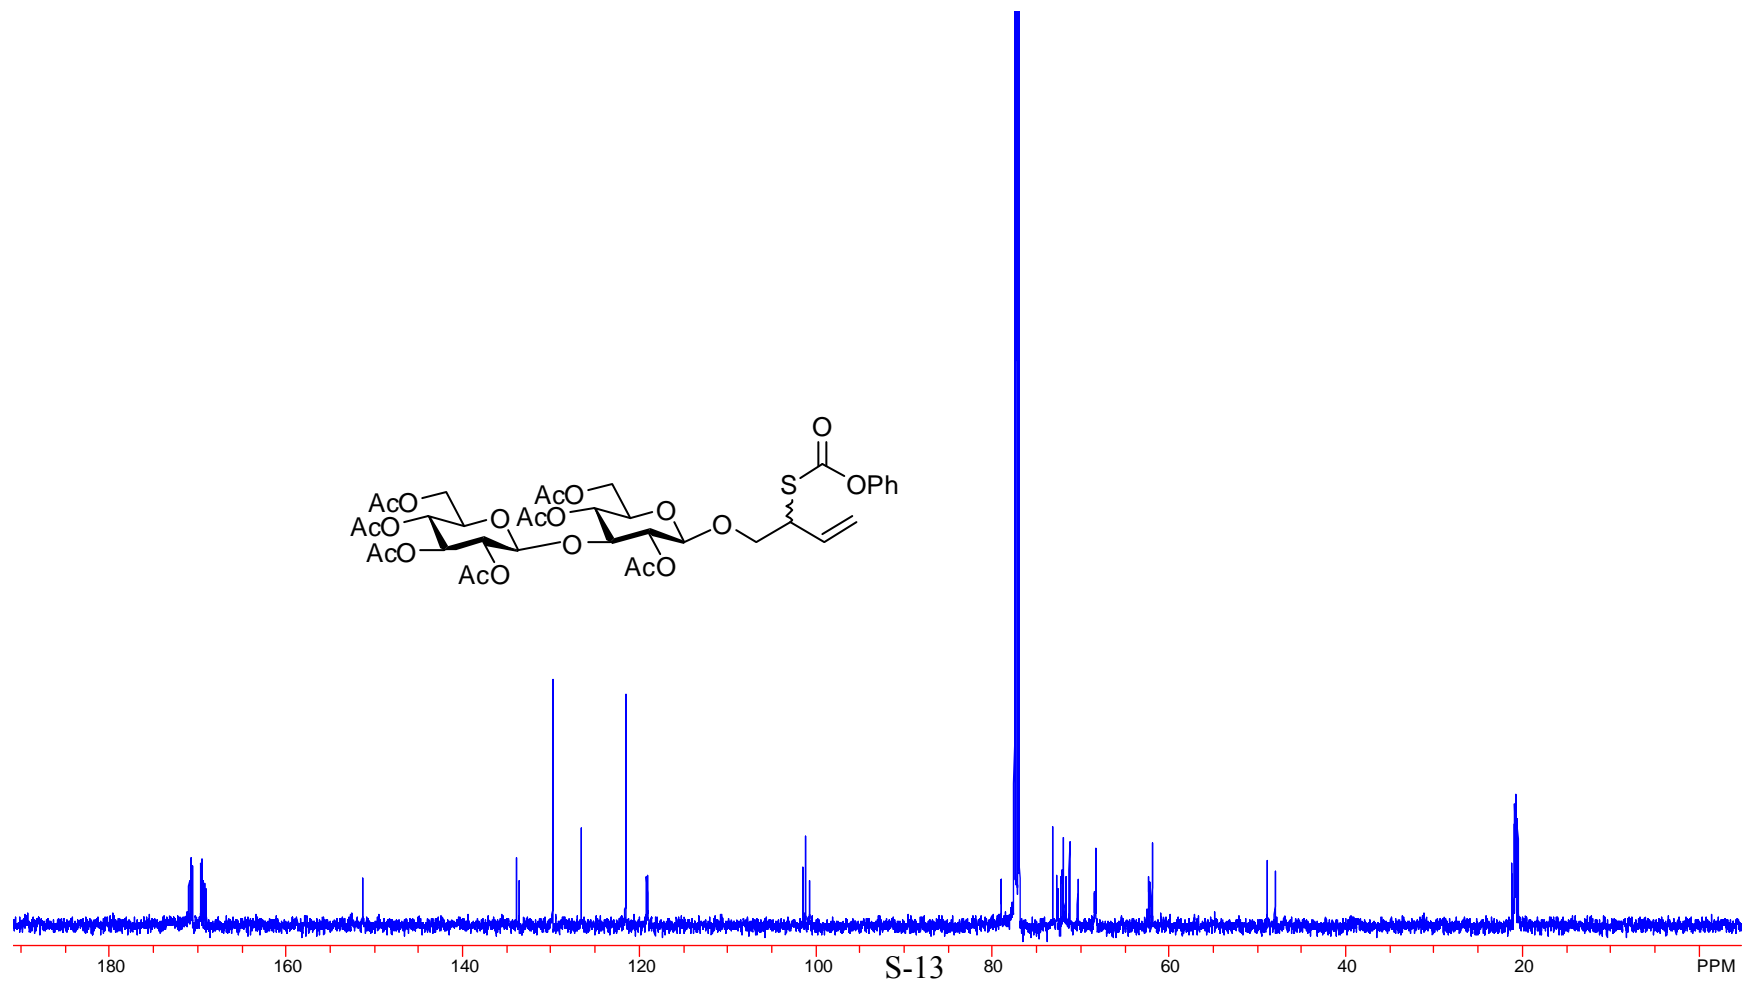

$^1\text{H-NMR}$  spectrum ( $\text{CD}_3\text{OD}$ , 500 MHz) of 2-(2-Pyridyldithio)-3-butenyl  $\beta$ -D-laminaribioside (**14**).

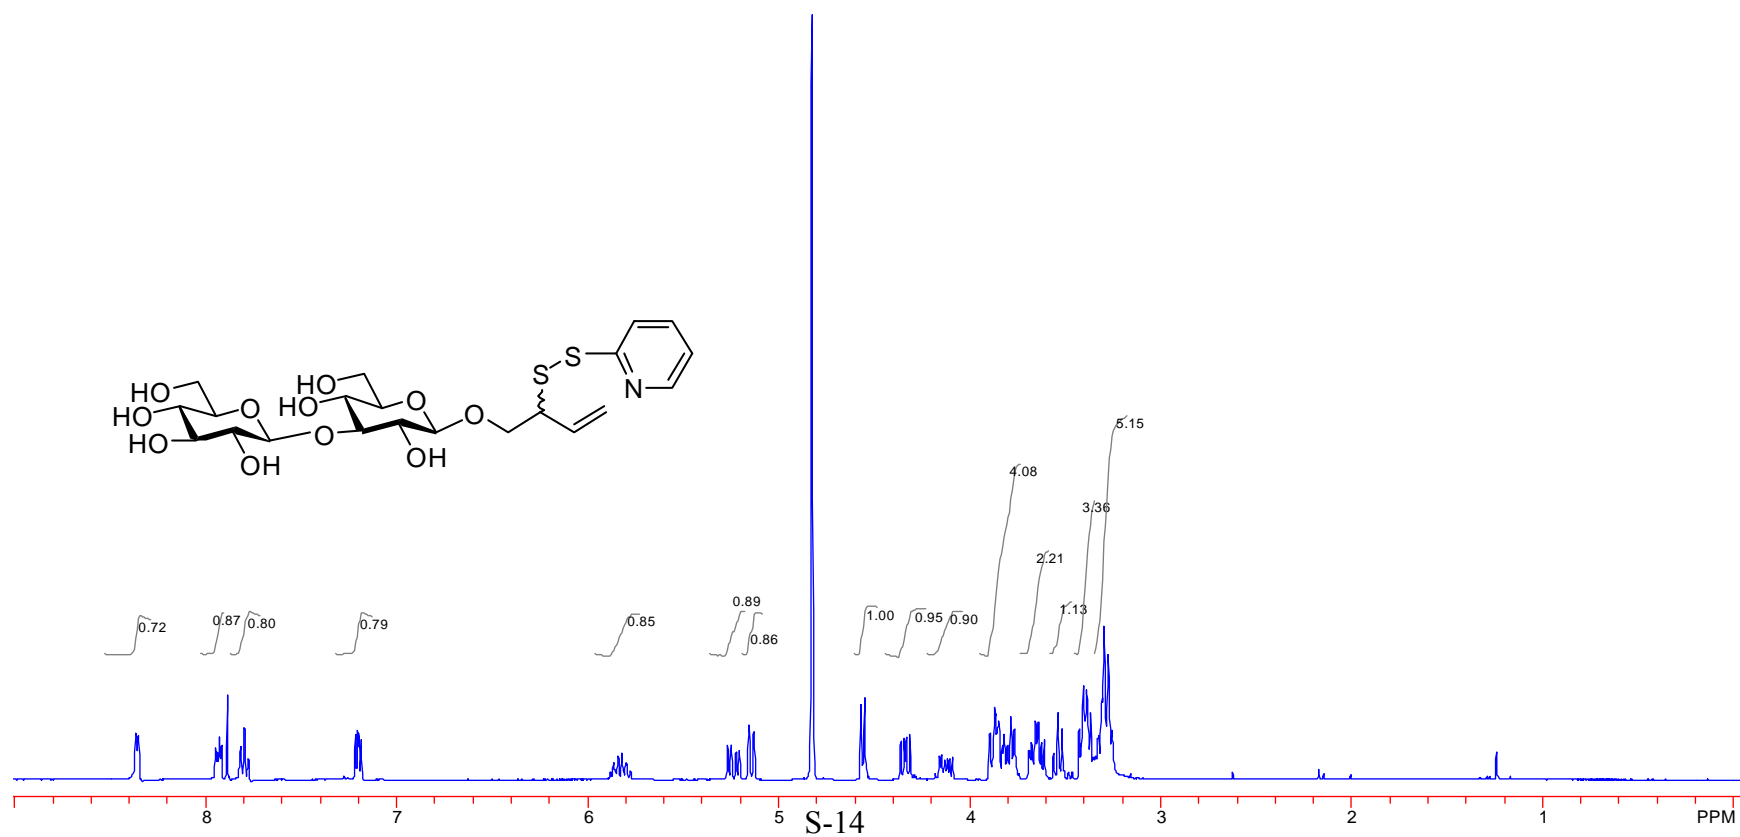

$^{13}\text{C}$ -NMR spectrum ( $\text{CD}_3\text{OD}$ , 125 MHz) of 2-(2-Pyridyldithio)-3-butenyl  $\beta$ -D-laminaribioside (**14**).

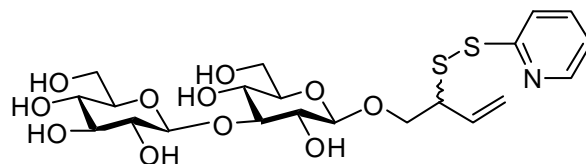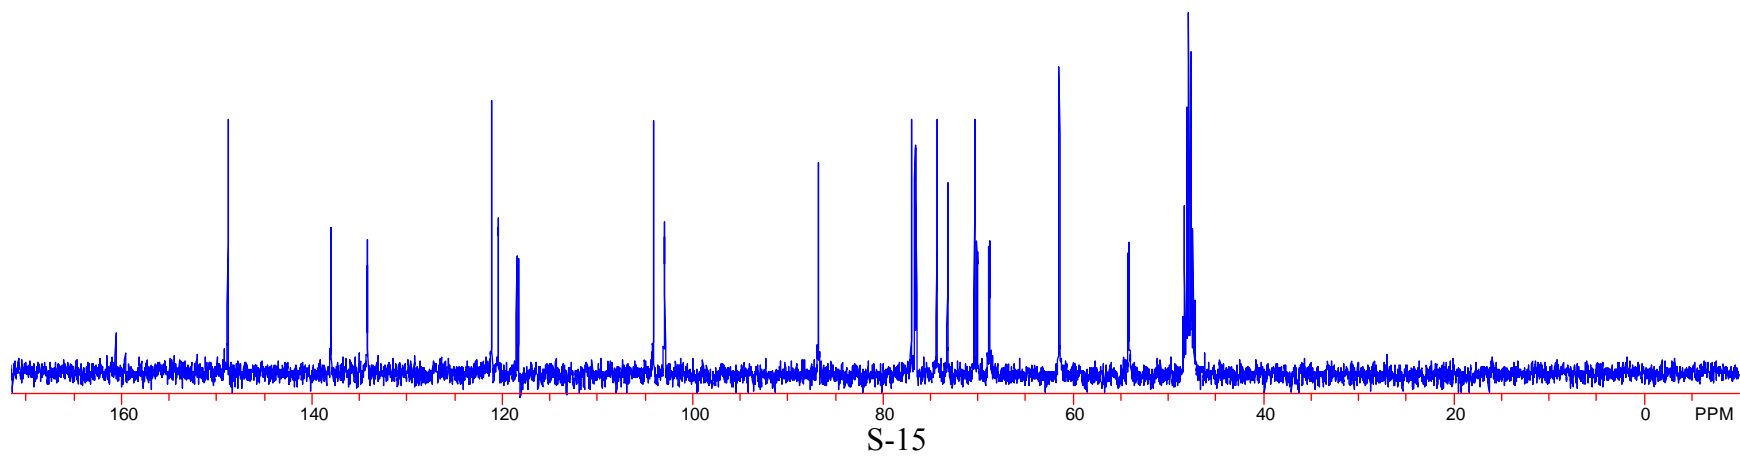

$^1\text{H-NMR}$  spectrum ( $\text{CDCl}_3$ , 500 MHz) of 4-(4-Nitrophenyloxythionocarbonyloxy)-2Z-butenyl tetra-O-acetyl- $\beta$ -D-glucopyranoside (**15**).

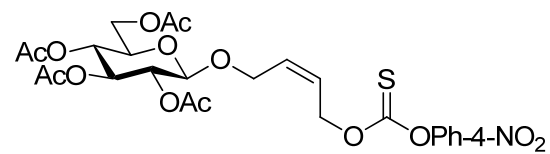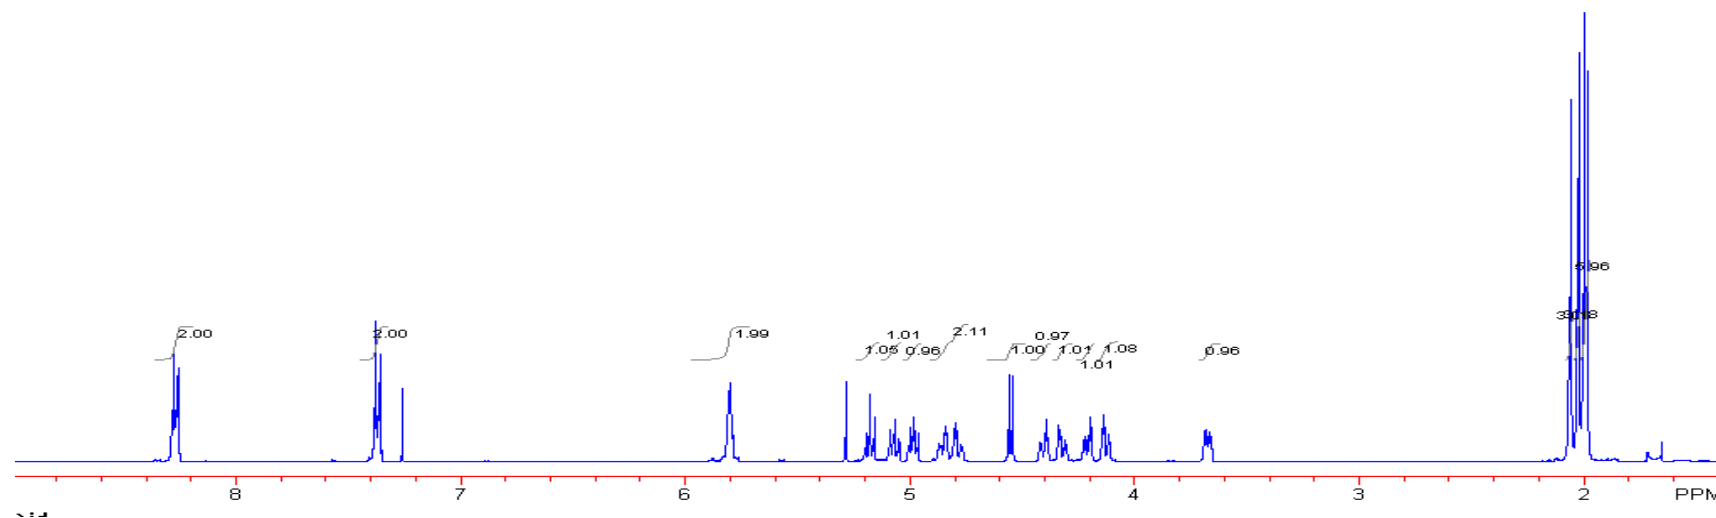



$^{13}\text{C}$ -NMR spectrum ( $\text{CDCl}_3$ , 125 MHz) of 4-(4-Nitrophenoxythionocarbonyloxy)-2Z-butenyl tetra-O-acetyl- $\beta$ -D-glucopyranoside (**15**).

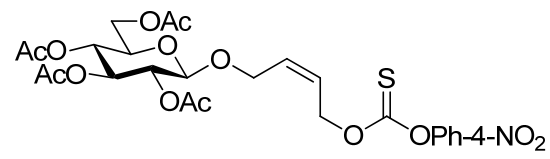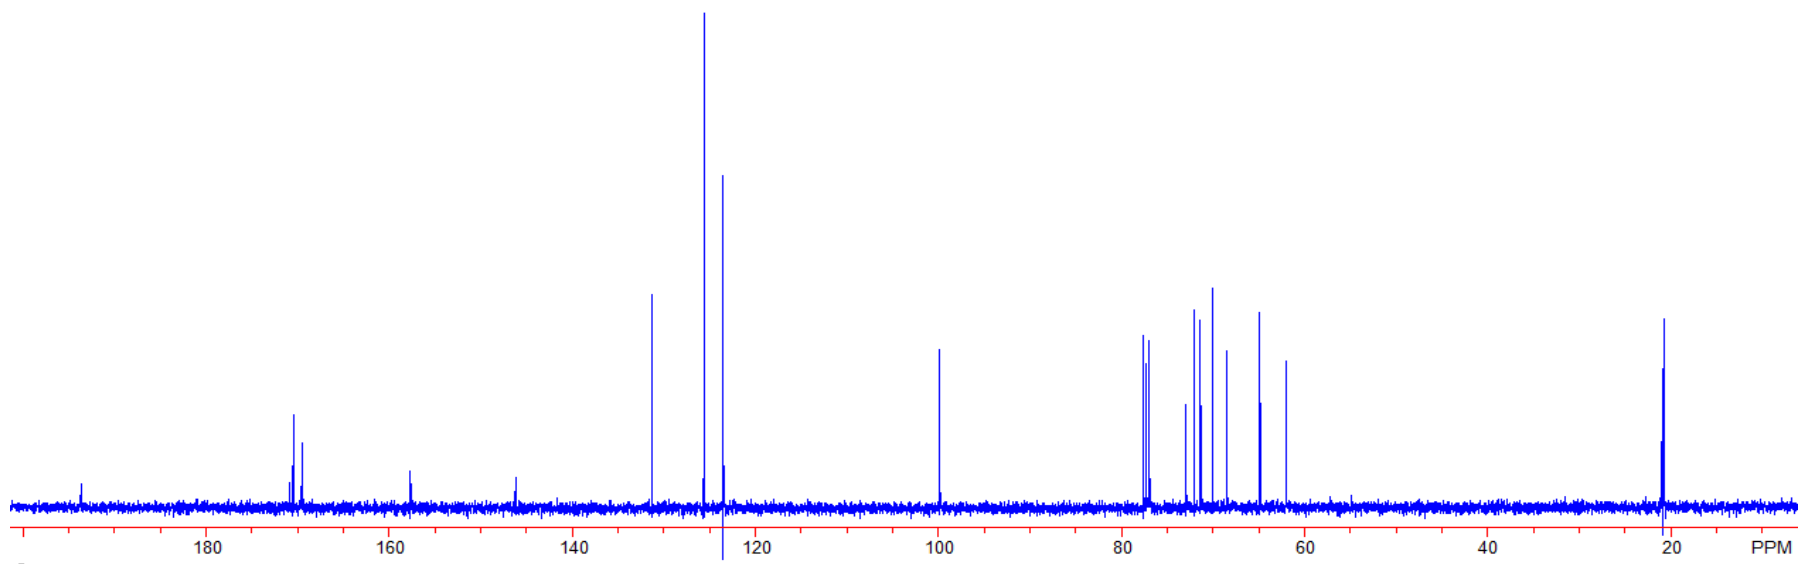

S-17

<sup>1</sup>H-NMR spectrum (CDCl<sub>3</sub>, 500 MHz) 4-[*N*-(2-Azidoethyl)-*N*-(benzyl)thionocarbamoyloxy]-2*Z*-butenyl 2,3,4,6-tetra-*O*-acetyl-β-*D*-glucopyranoside (**16**).

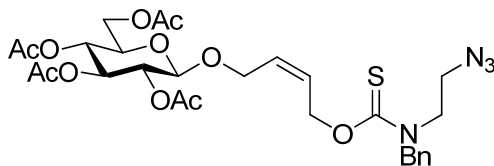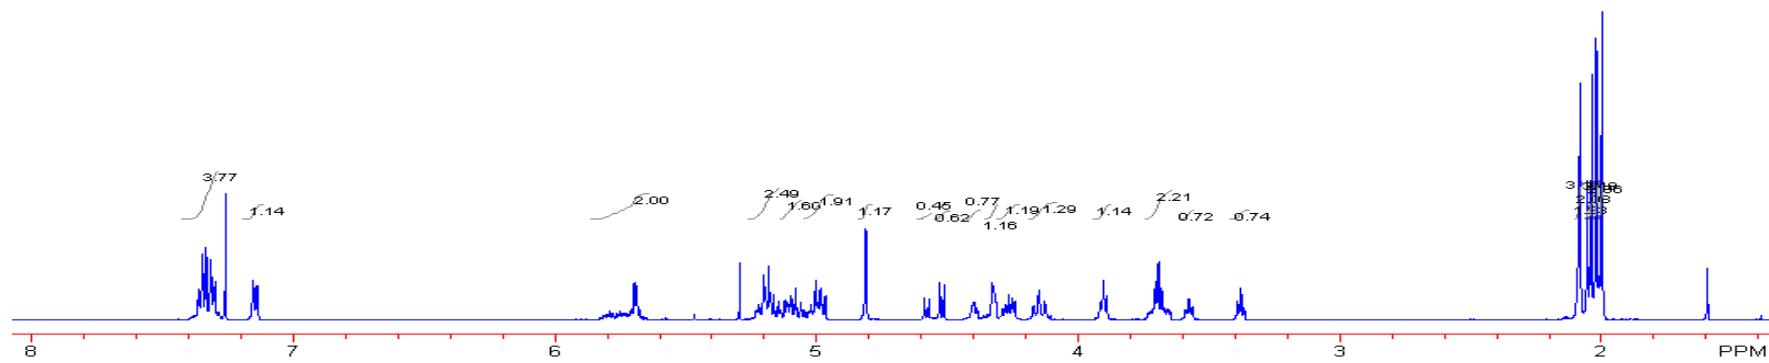

S-18

$^{13}\text{C}$ -NMR spectrum ( $\text{CDCl}_3$ , 125 MHz) 4-[*N*-(2-Azidoethyl)-*N*-(benzyl)thionocarbamoyloxy]-2*Z*-butenyl 2,3,4,6-tetra-*O*-acetyl- $\beta$ -D-glucopyranoside (**16**).

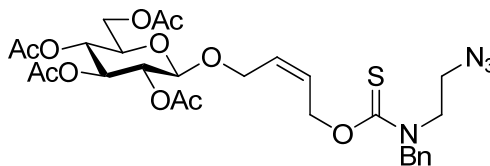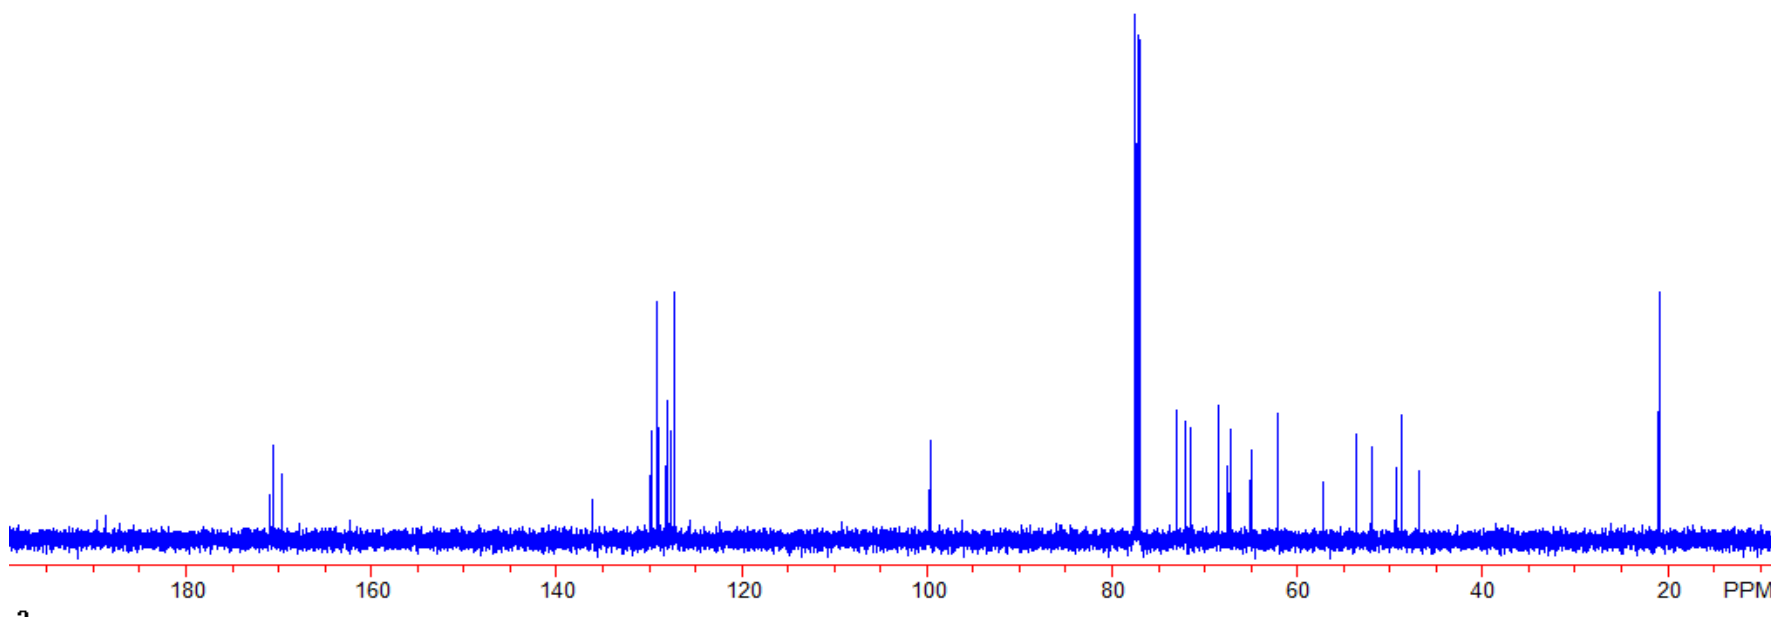

<sup>1</sup>H-NMR spectrum (CDCl<sub>3</sub>, 500 MHz) 2-[*N*-(2-Azidoethyl)-*N*-(benzyl)carbamoylthioxy]-3-butenyl 2,3,4,6-tetra-*O*-acetyl-β-D-glucopyranoside (17).

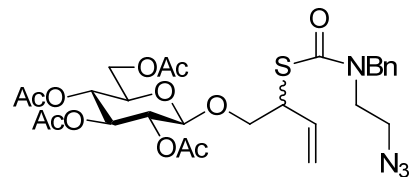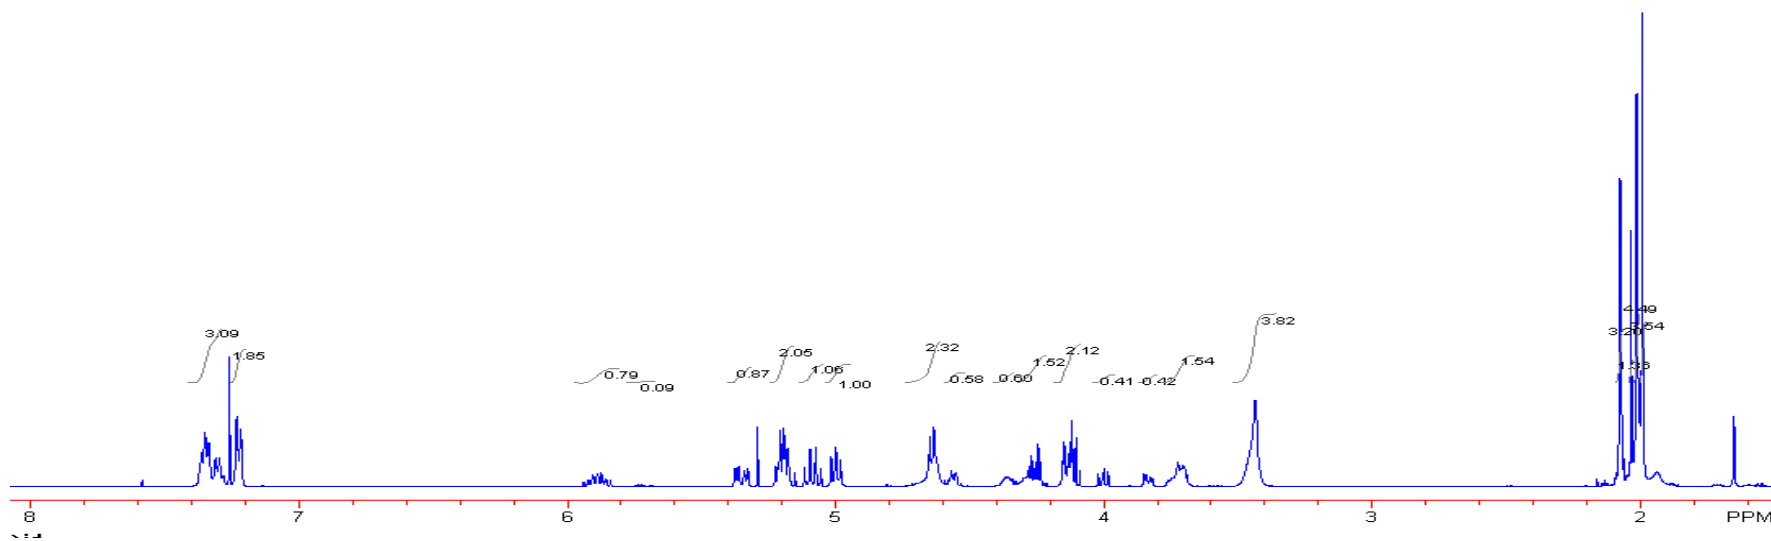

S-20

$^{13}\text{C}$ -NMR spectrum ( $\text{CDCl}_3$ , 125 MHz) 2-[*N*-(2-Azidoethyl)-*N*-(benzyl)carbamoylthioxy]-3-butenyl 2,3,4,6-tetra-*O*-acetyl- $\beta$ -D-glucopyranoside (17).

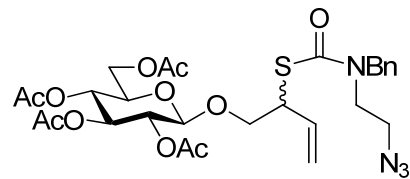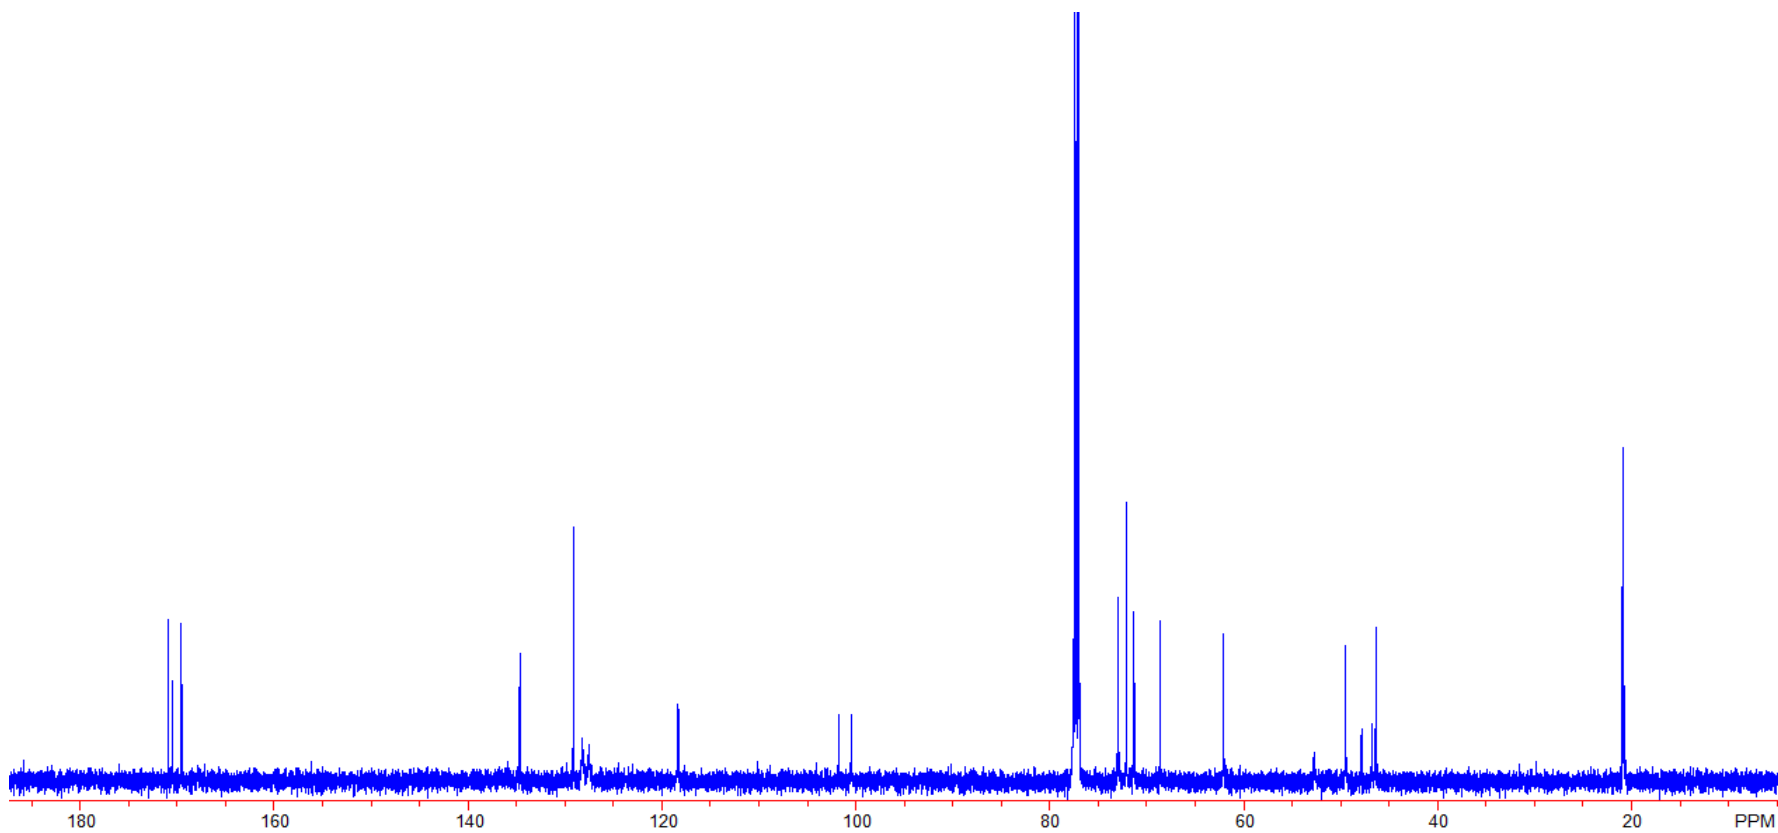

S-21

$^1\text{H-NMR}$  spectrum ( $\text{CD}_3\text{OD}$ , 500 MHz) 2-[*N*-(2-Azidoethyl)-*N*-(benzyl)carbamoylthioxy]-3-butenyl  $\beta$ -D-glucopyranoside (**18**).

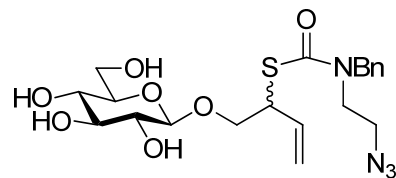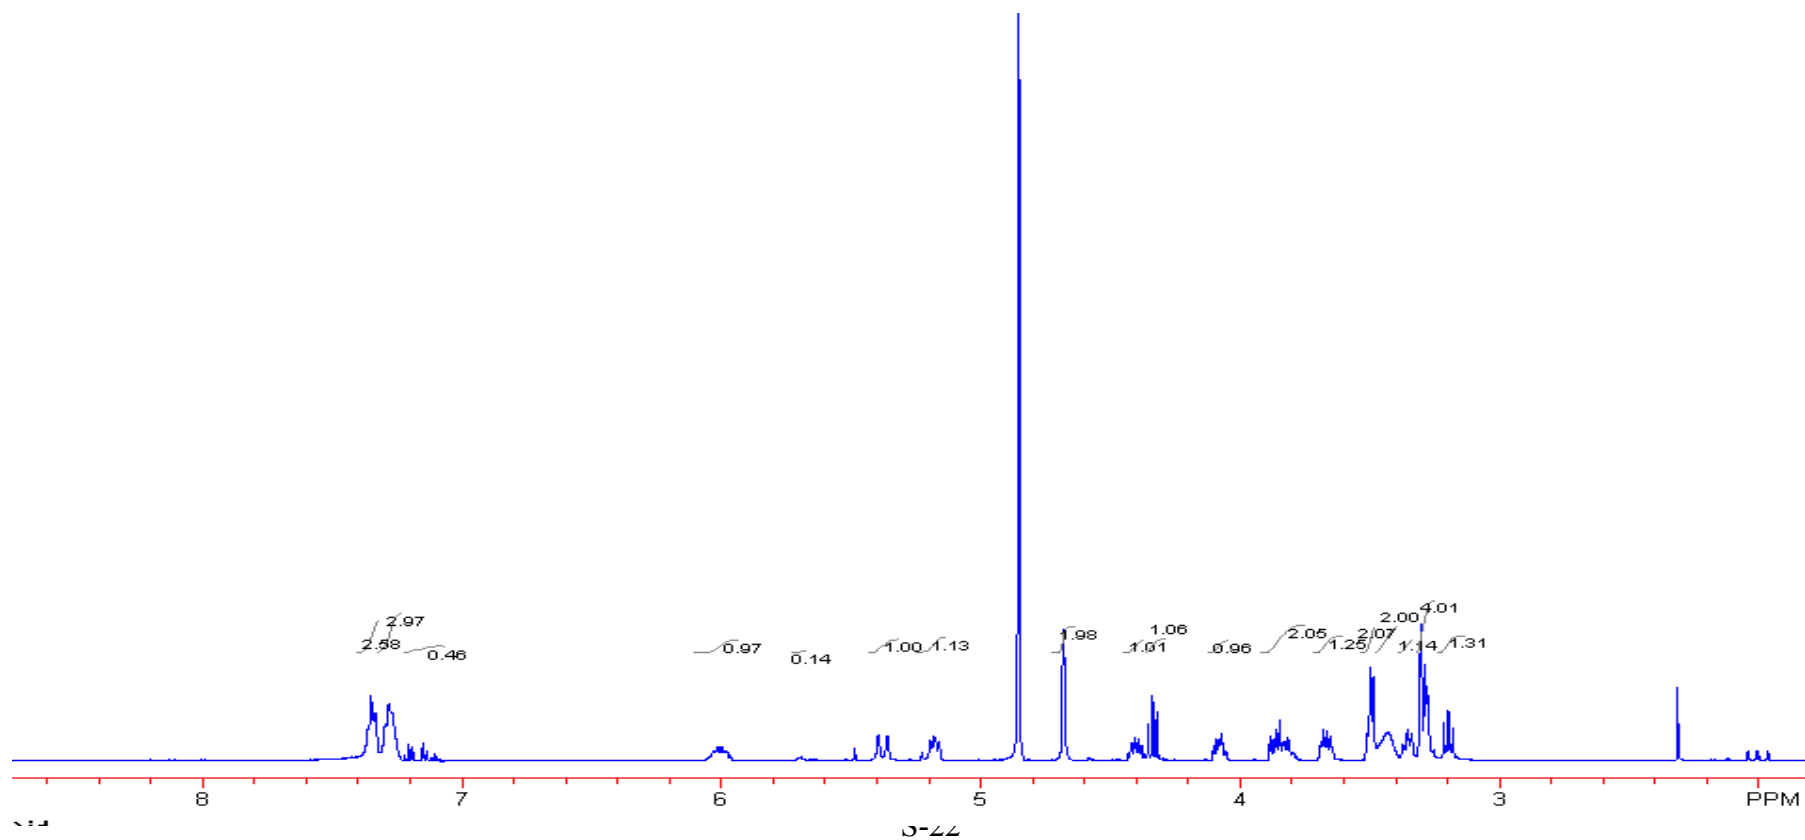

$^{13}\text{C}$ -NMR spectrum ( $\text{CD}_3\text{OD}$ , 125 MHz) 2-[*N*-(2-Azidoethyl)-*N*-(benzyl)carbamoylthioxy]-3-butenyl  $\beta$ -D-glucopyranoside (**18**).

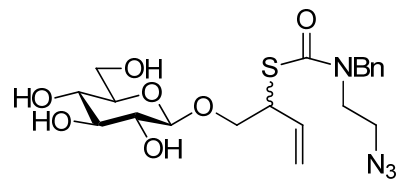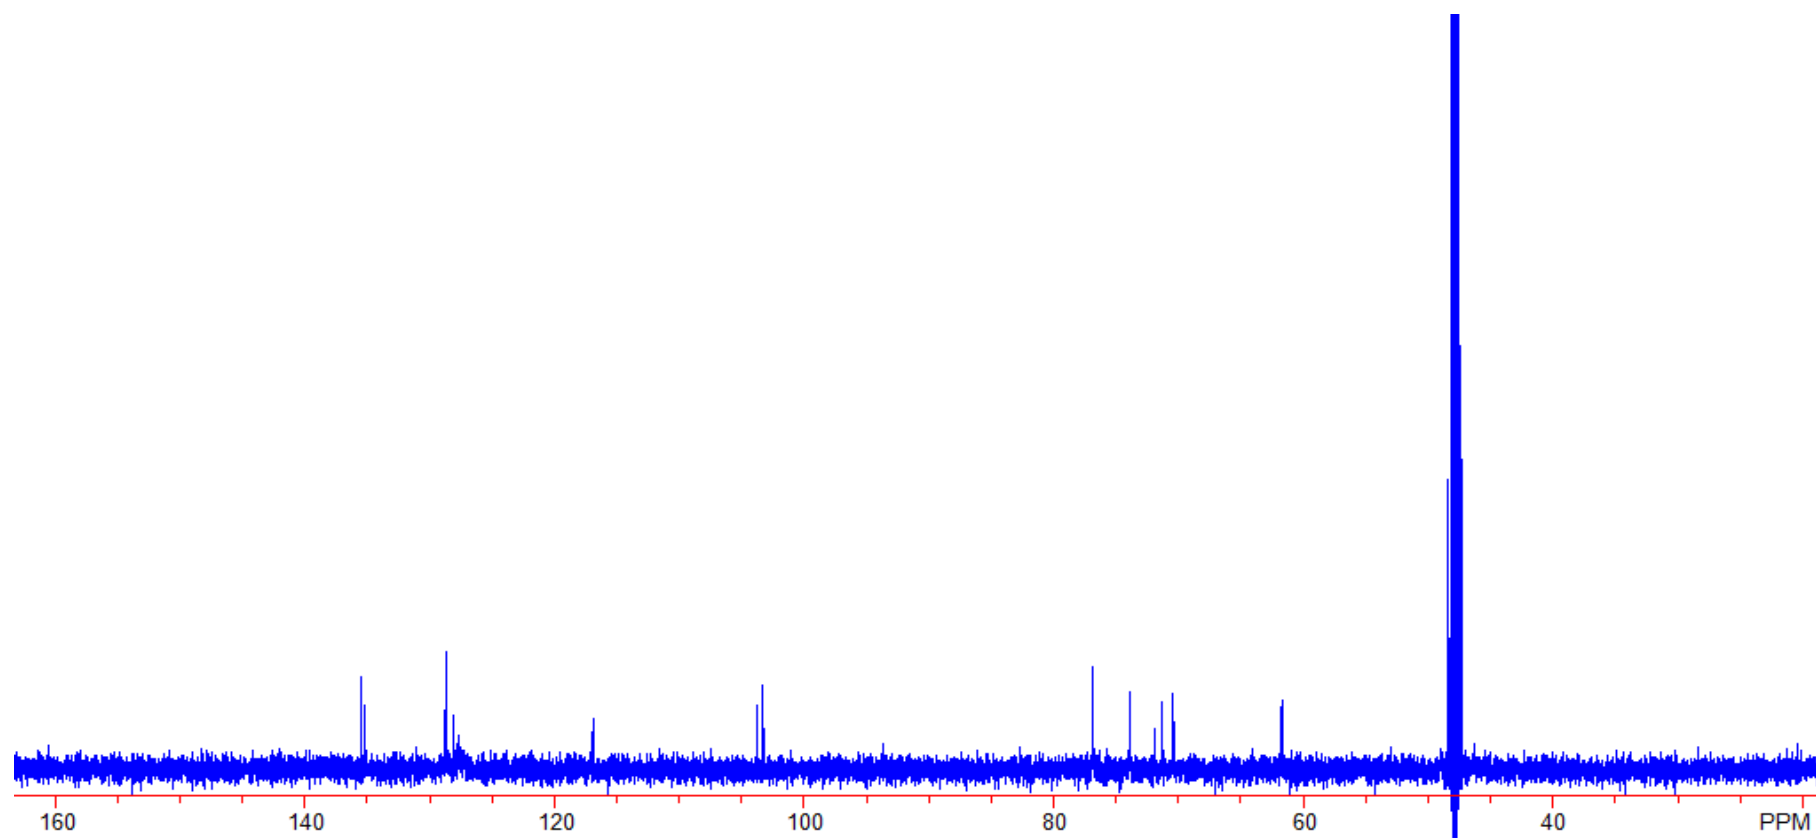

<sup>1</sup>H-NMR spectrum (CDCl<sub>3</sub>, 400 MHz) 2-(Phenyloxycarbonylthioxy)-3-butenyl 2-acetamido-3,4,6-tri-*O*-acetyl-2-deoxy-β-D-glucopyranoside

(21)

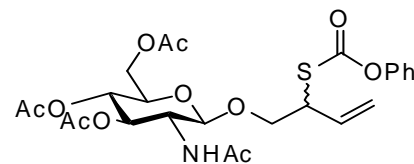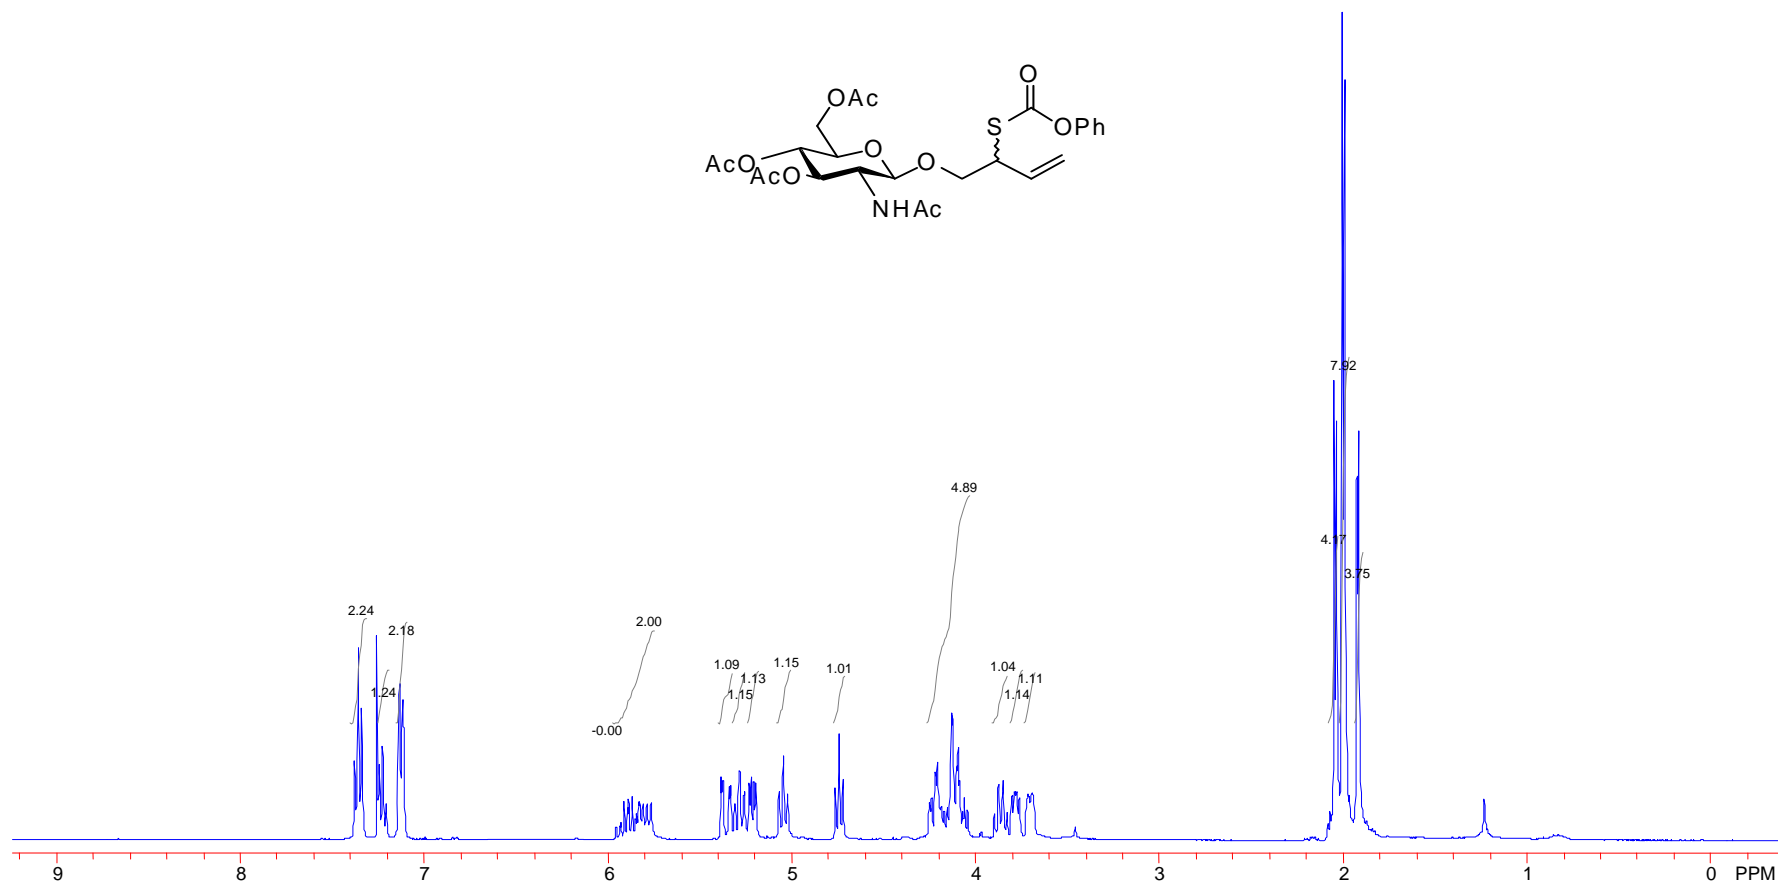

S-24



$^{13}\text{C}$ -NMR spectrum ( $\text{CDCl}_3$ , 100 MHz) 2-(Phenyloxycarbonylthioxy)-3-butenyl 2-acetamido-3,4,6-tri-*O*-acetyl-2-deoxy- $\beta$ -D-glucopyranoside

(21)

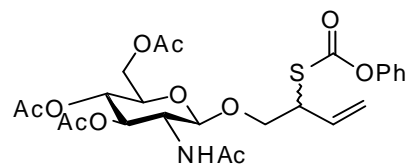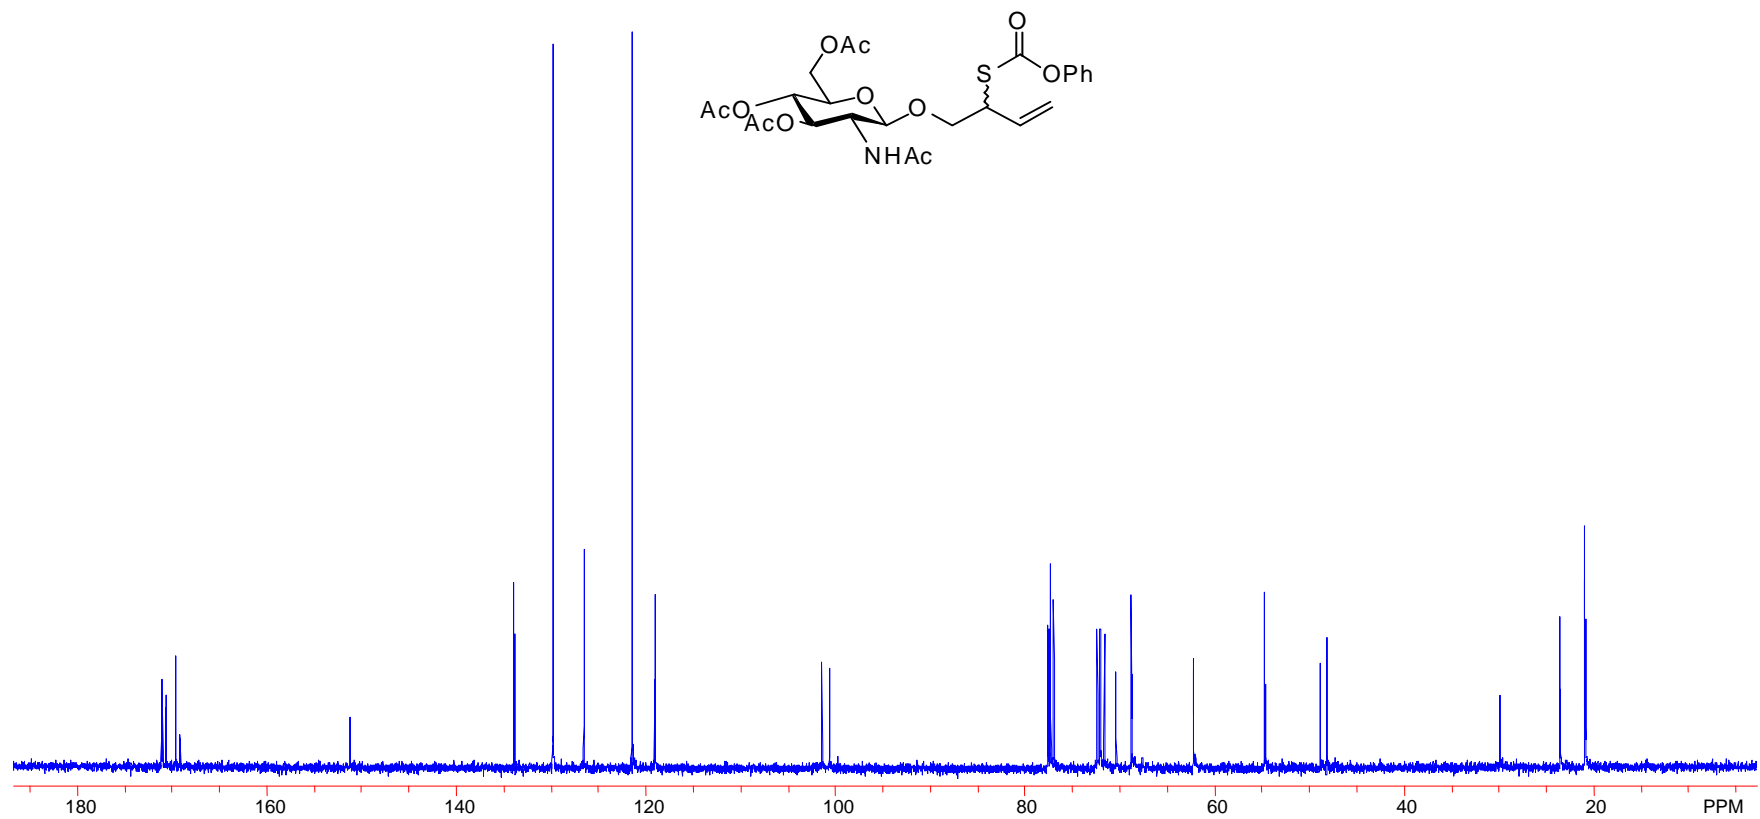

S-25

$^1\text{H-NMR}$  spectrum ( $\text{CDCl}_3$ , 400 MHz) 2-(2-Pyridyldithio)-3-butenyl 2-acetamido-2-deoxy- $\beta$ -D-glucopyranoside (**22**).

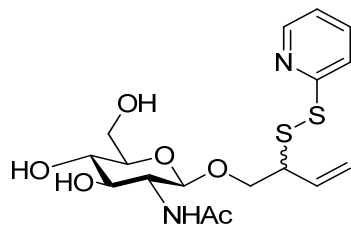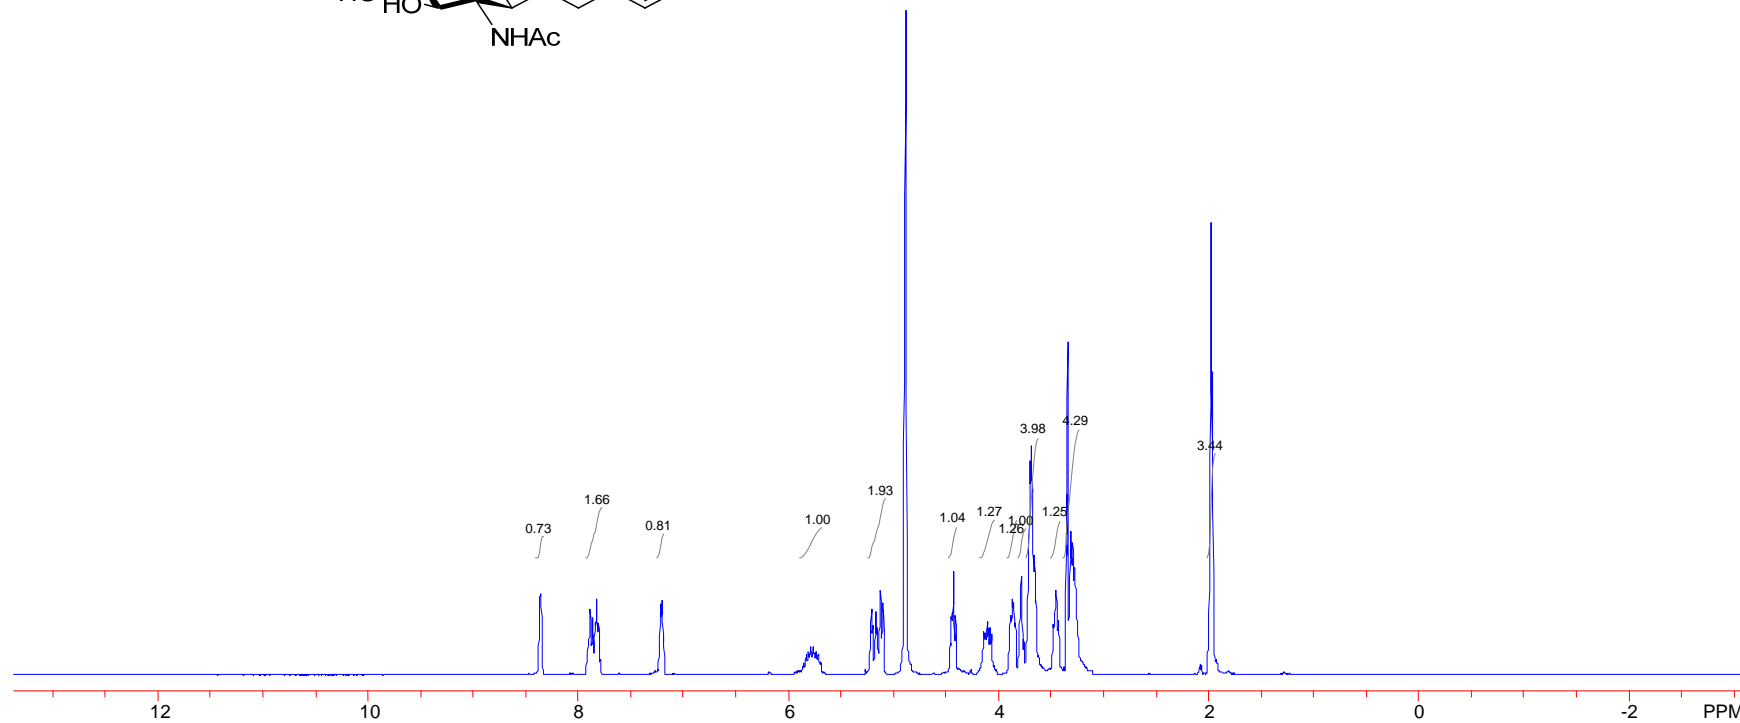

$^{13}\text{C}$ -NMR spectrum ( $\text{CDCl}_3$ , 100 MHz) 2-(2-Pyridyldithio)-3-butenyl 2-acetamido-2-deoxy- $\beta$ -D-glucopyranoside (**22**).

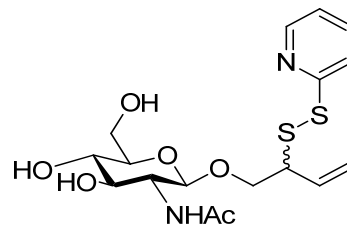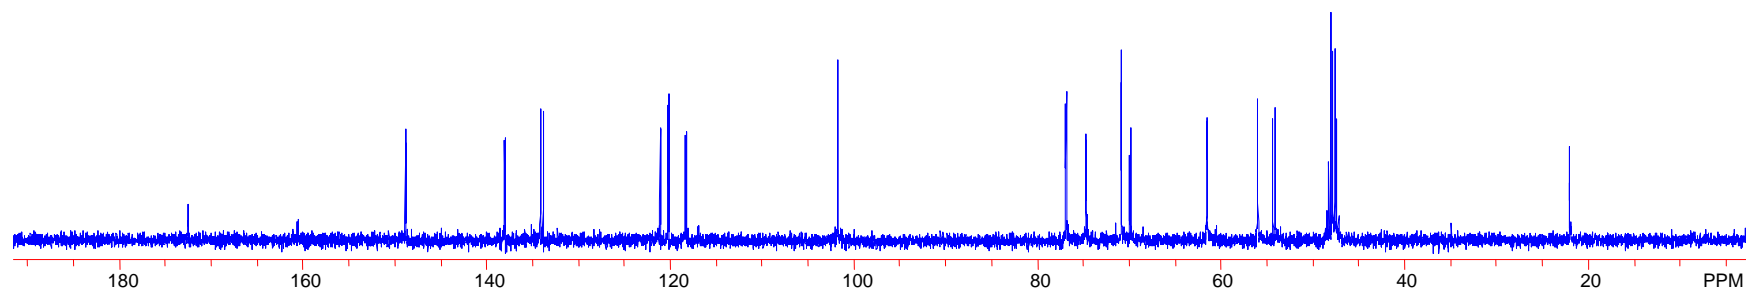

<sup>1</sup>H-NMR spectrum (CDCl<sub>3</sub>, 500 MHz) 4-(2-Naphthylmethoxy)-2-Z-butene-1-ol (**23**).

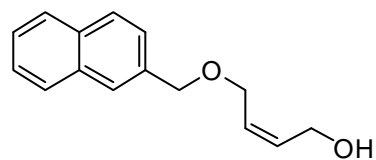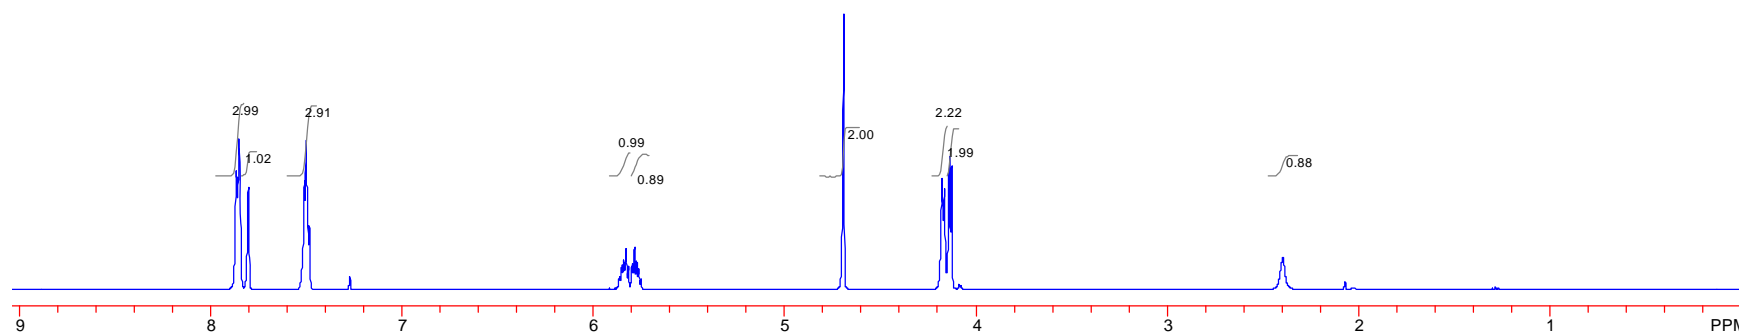

$^{13}\text{C}$ -NMR spectrum ( $\text{CDCl}_3$ , 125 MHz) 4-(2-Naphthylmethoxy)-2-Z-butene-1-ol (**23**).

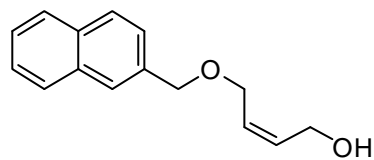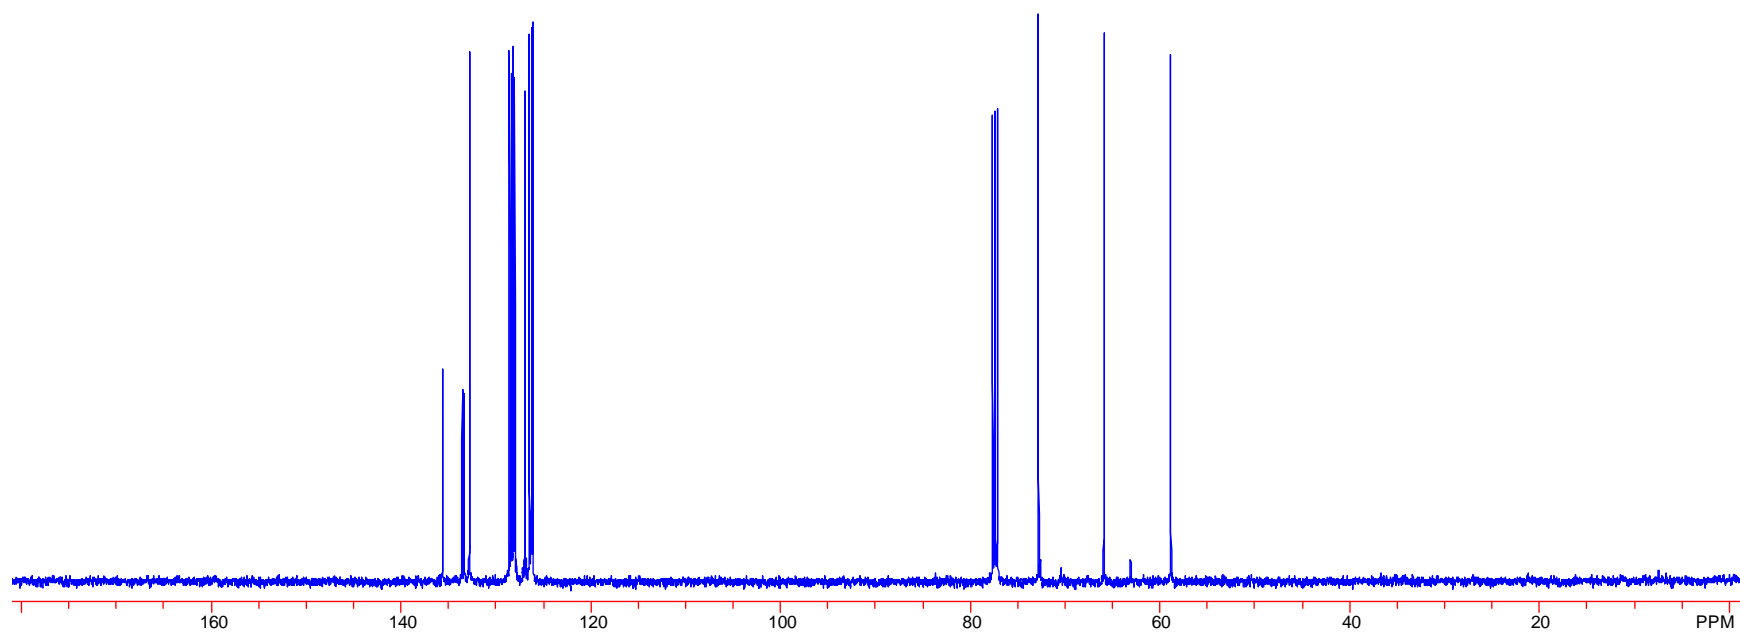

<sup>1</sup>H-NMR spectrum (CDCl<sub>3</sub>, 500 MHz) 1,2:5,6-Di-*O*-isopropylidene-3-*O*-4-(2-naphthylmethoxy)-2-*Z*-butenyl- $\alpha$ -D-glucofuranose (**24**).

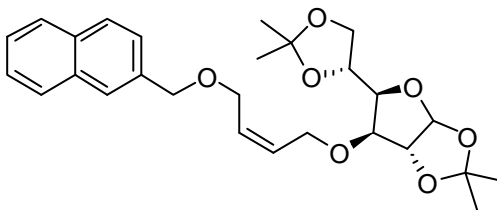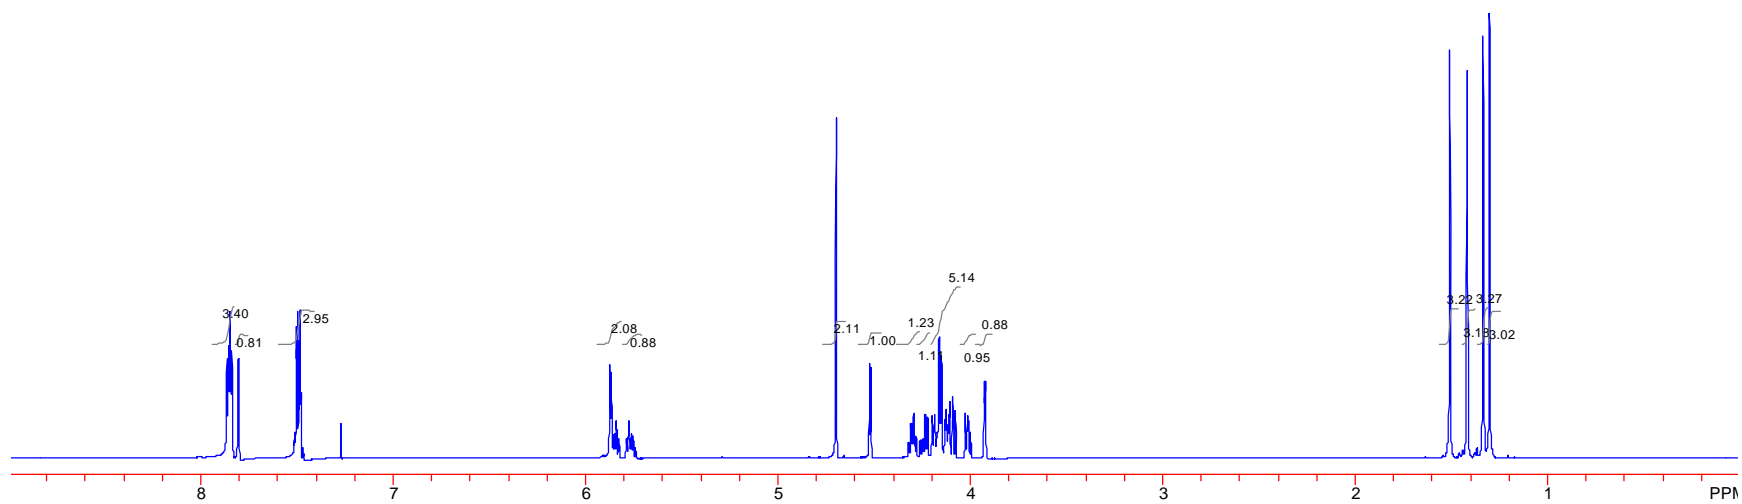

$^{13}\text{C}$ -NMR spectrum ( $\text{CDCl}_3$ , 125 MHz) 1,2:5,6-Di-*O*-isopropylidene-3-*O*-4-(2-naphthylmethoxy)-2-*Z*-butenyl- $\alpha$ -D-glucofuranose (**24**).

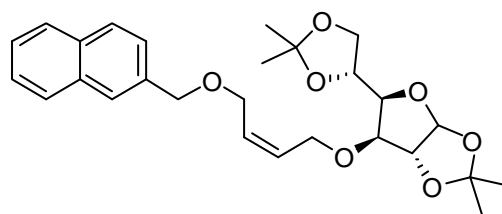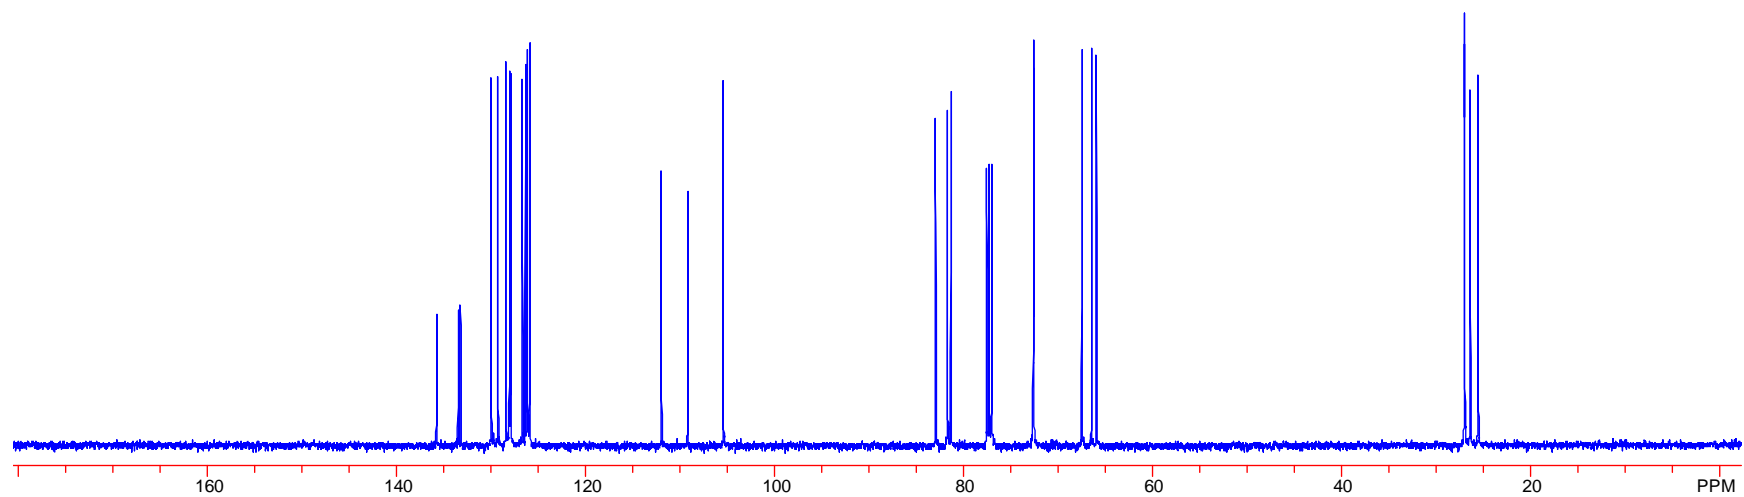

$^1\text{H-NMR}$  spectrum ( $\text{CDCl}_3$ , 500 MHz) 1,2,4,6-Tetra-*O*-acetyl-3-*O*-[4-(2-naphthylmethoxy)-2-*Z*-butenyl]-*D*- $\alpha,\beta$ -glucopyranose (**25**).

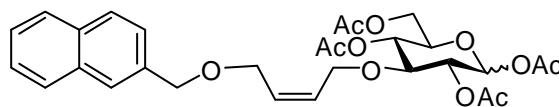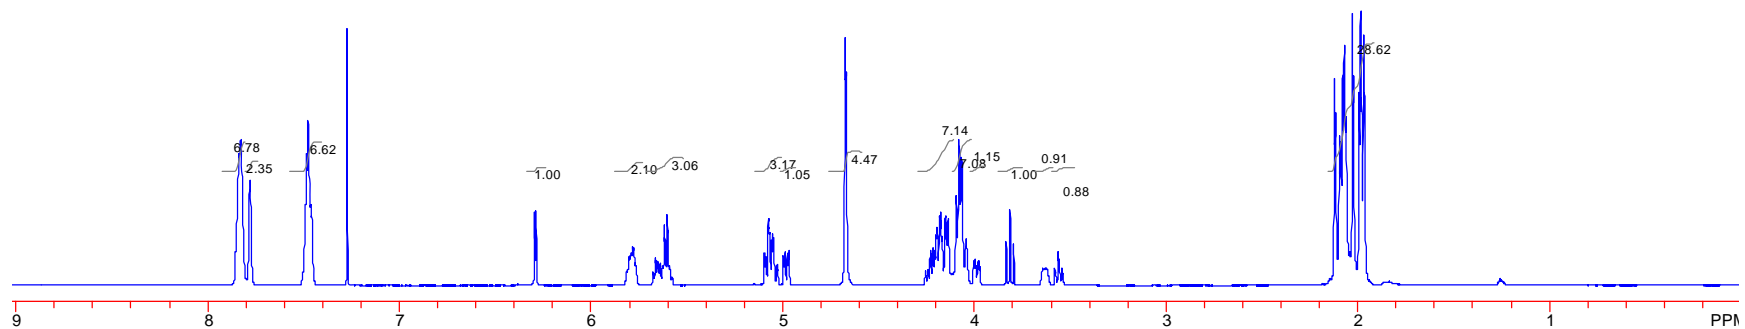



$^{13}\text{C}$ -NMR spectrum ( $\text{CDCl}_3$ , 125 MHz) 1,2,4,6-Tetra-*O*-acetyl-3-*O*-[4-(2-naphthylmethoxy)-2-*Z*-butenyl]-*D*- $\alpha,\beta$ -glucopyranose (**25**).

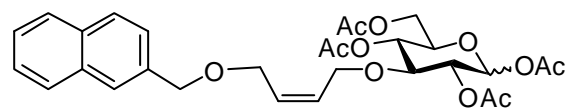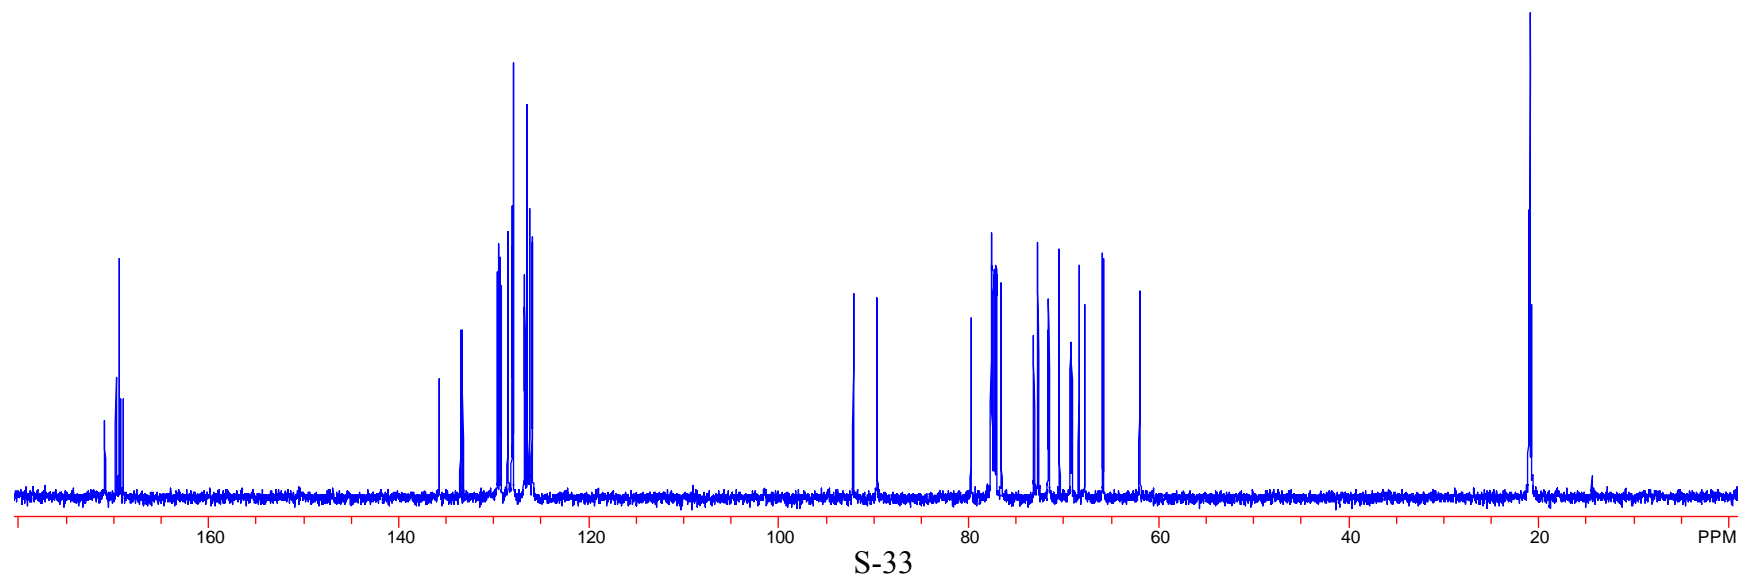

<sup>1</sup>H-NMR spectrum (CDCl<sub>3</sub>, 500 MHz) 2,4,6-Tri-*O*-acetyl-3-*O*-[4-(2-naphthylmethoxy)-2-*Z*-butenyl]- $\alpha$ -D-glucopyranosyl trichloroacetimidate (26).

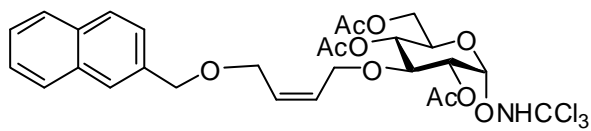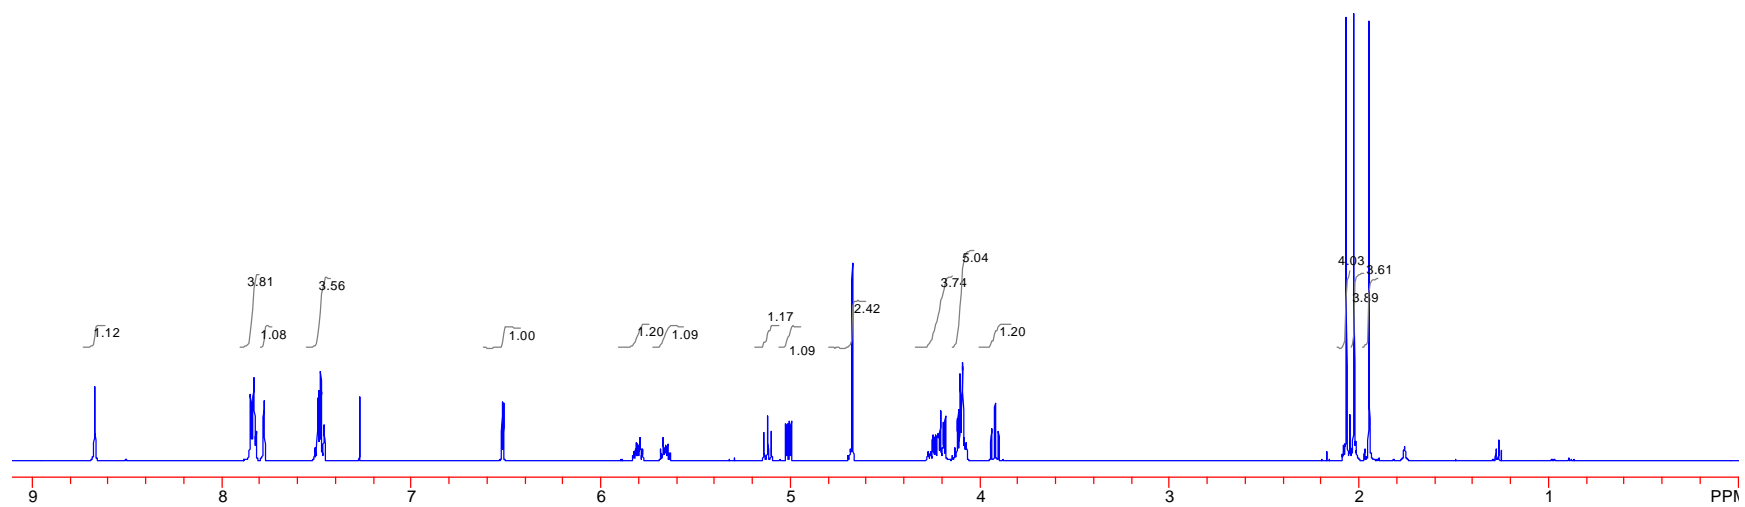

S-34

$^{13}\text{C}$ -NMR spectrum ( $\text{CDCl}_3$ , 125 MHz) 2,4,6-Tri-*O*-acetyl-3-*O*-[4-(2-naphthylmethoxy)-2-*Z*-butenyl]- $\alpha$ -D-glucopyranosyl trichloroacetimidate (26).

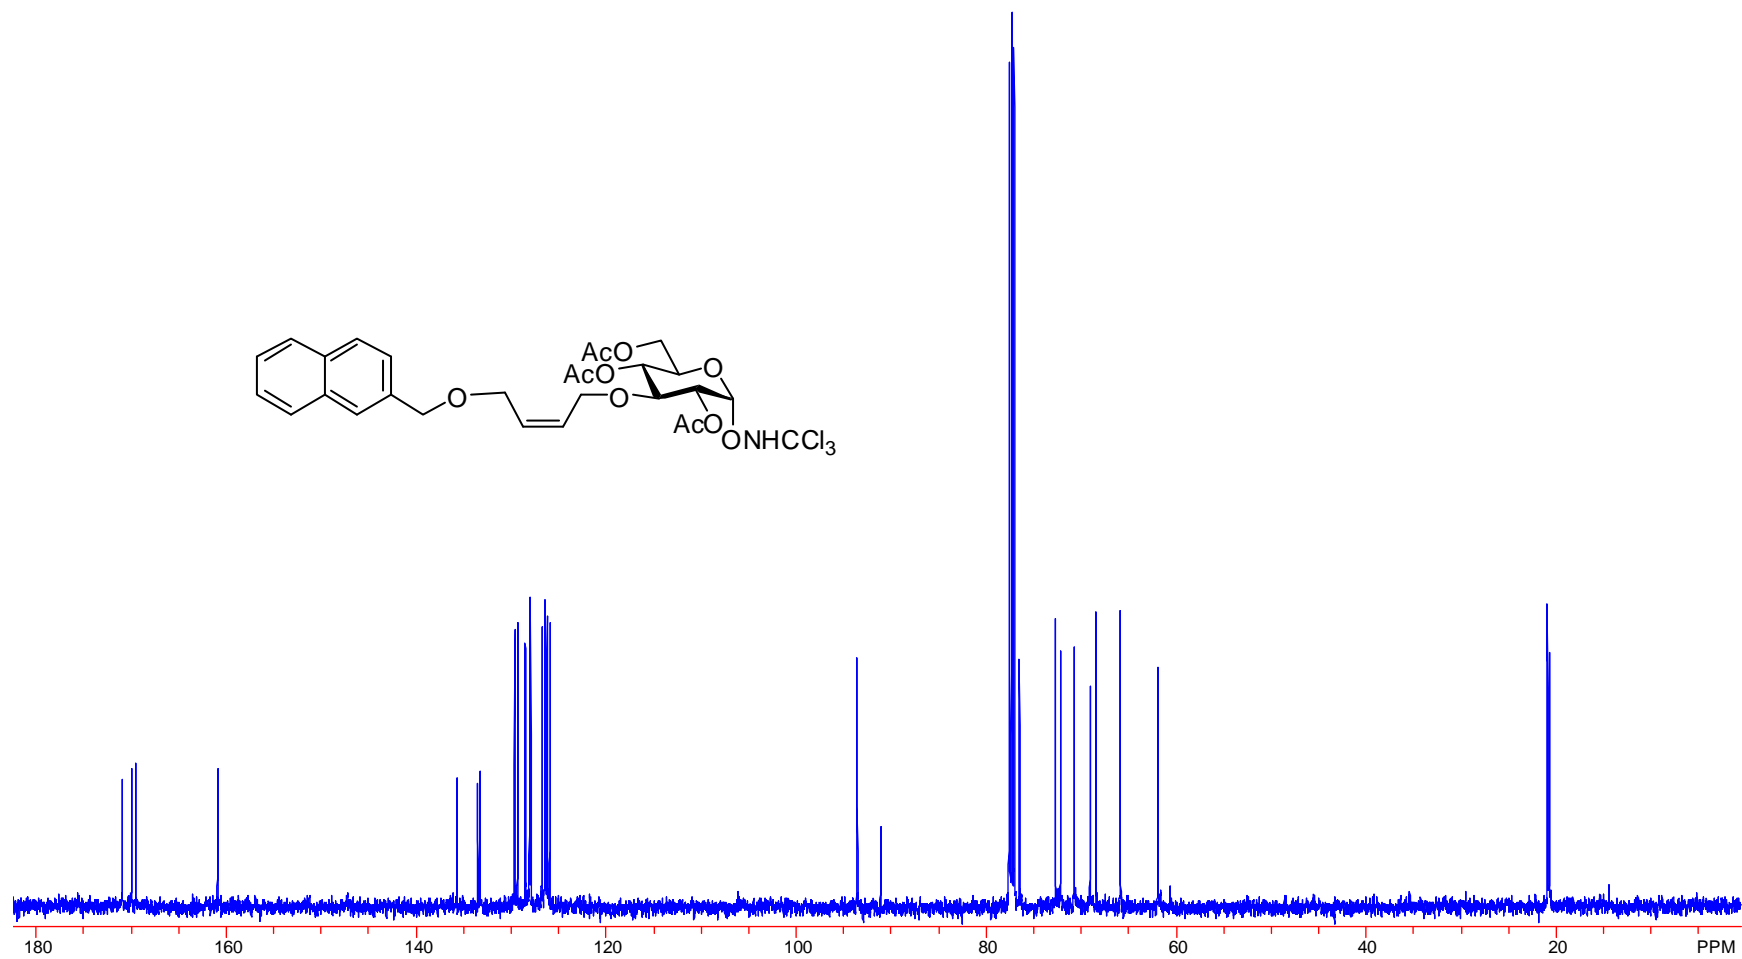

<sup>1</sup>H-NMR spectrum (CDCl<sub>3</sub>, 500 MHz) Methyl 2,4,6-tri-*O*-acetyl-3-*O*-[4-(2-naphthylmethoxy)-2-*Z*-butenyl]-β-D-glucopyranoside (**27**).

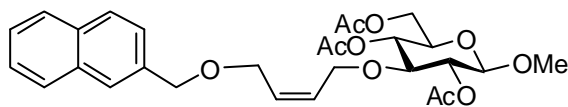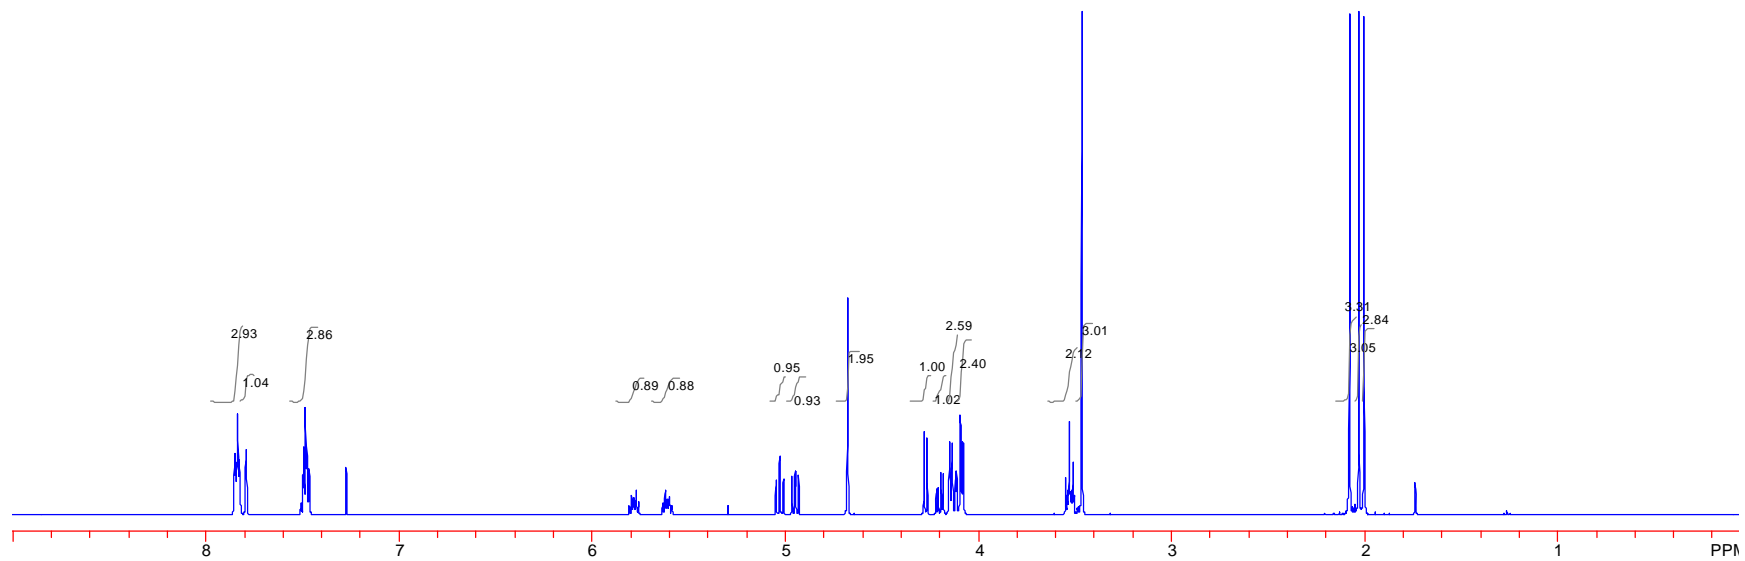

$^{13}\text{C}$ -NMR spectrum ( $\text{CDCl}_3$ , 125 MHz) Methyl 2,4,6-tri-*O*-acetyl-3-*O*-[4-(2-naphthylmethoxy)-2-*Z*-butenyl]- $\beta$ -D-glucopyranoside (**27**).

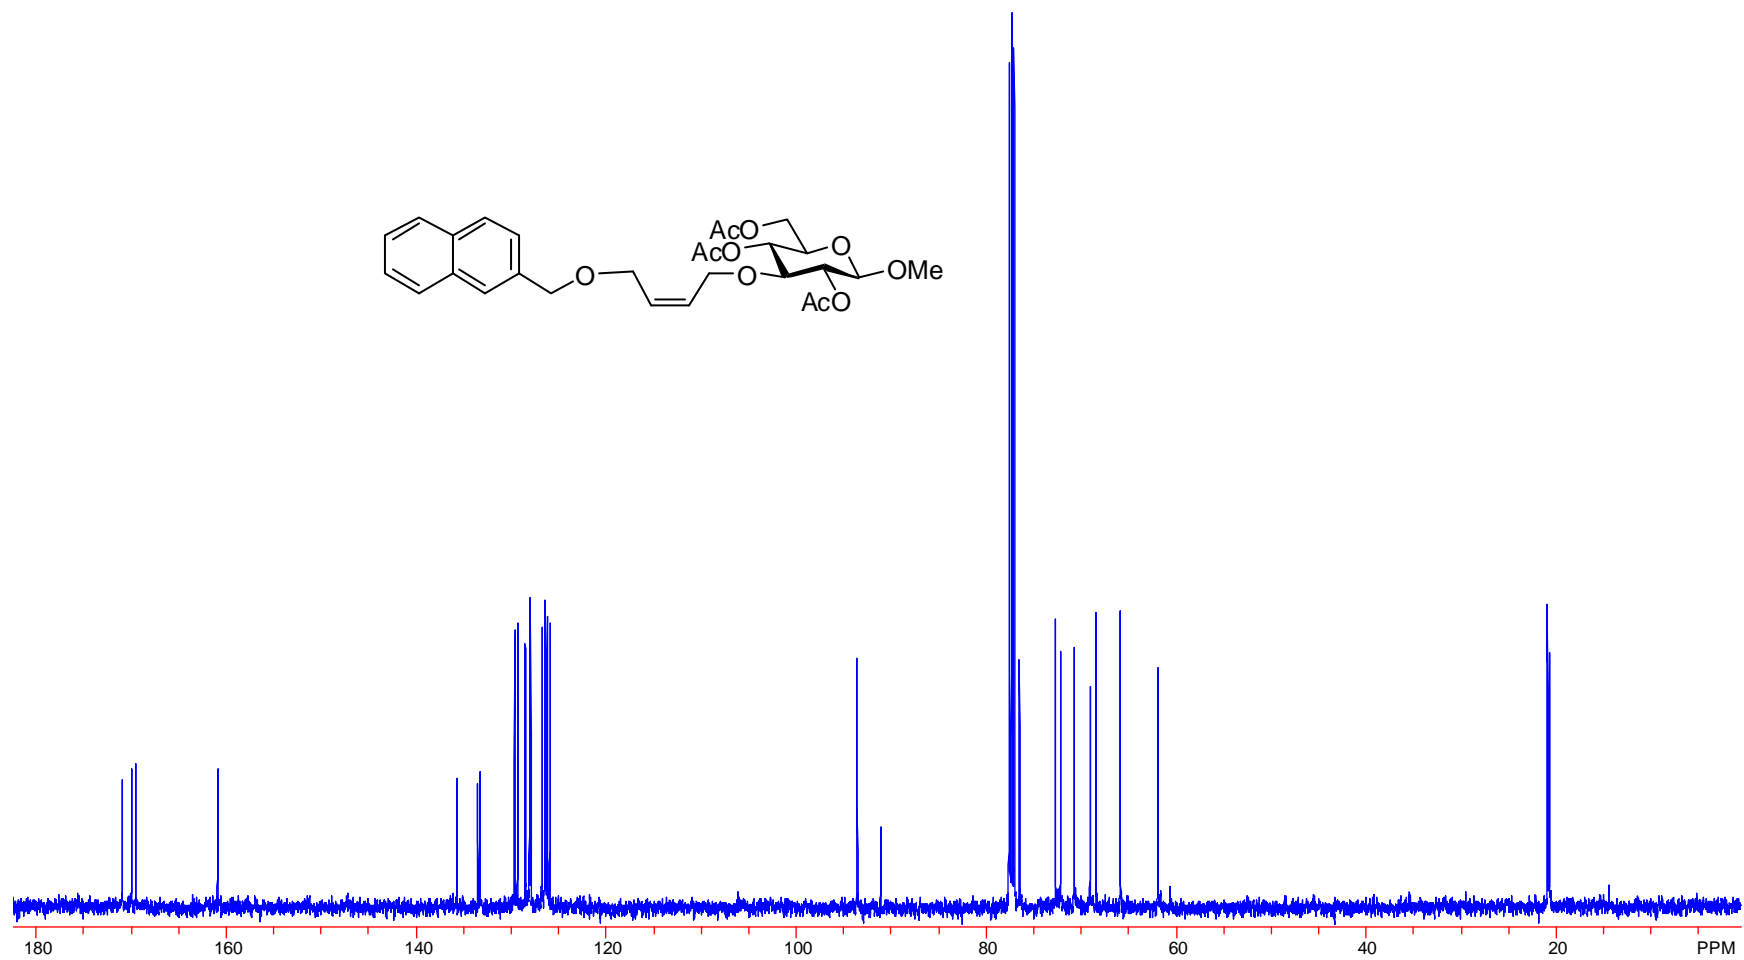

$^1\text{H-NMR}$  spectrum ( $\text{CDCl}_3$ , 500 MHz) Methyl 2,4,6-tri-*O*-acetyl-3-*O*-[4-hydroxy-2-*Z*-butenyl]- $\beta$ -D-glucopyranoside (**28**).

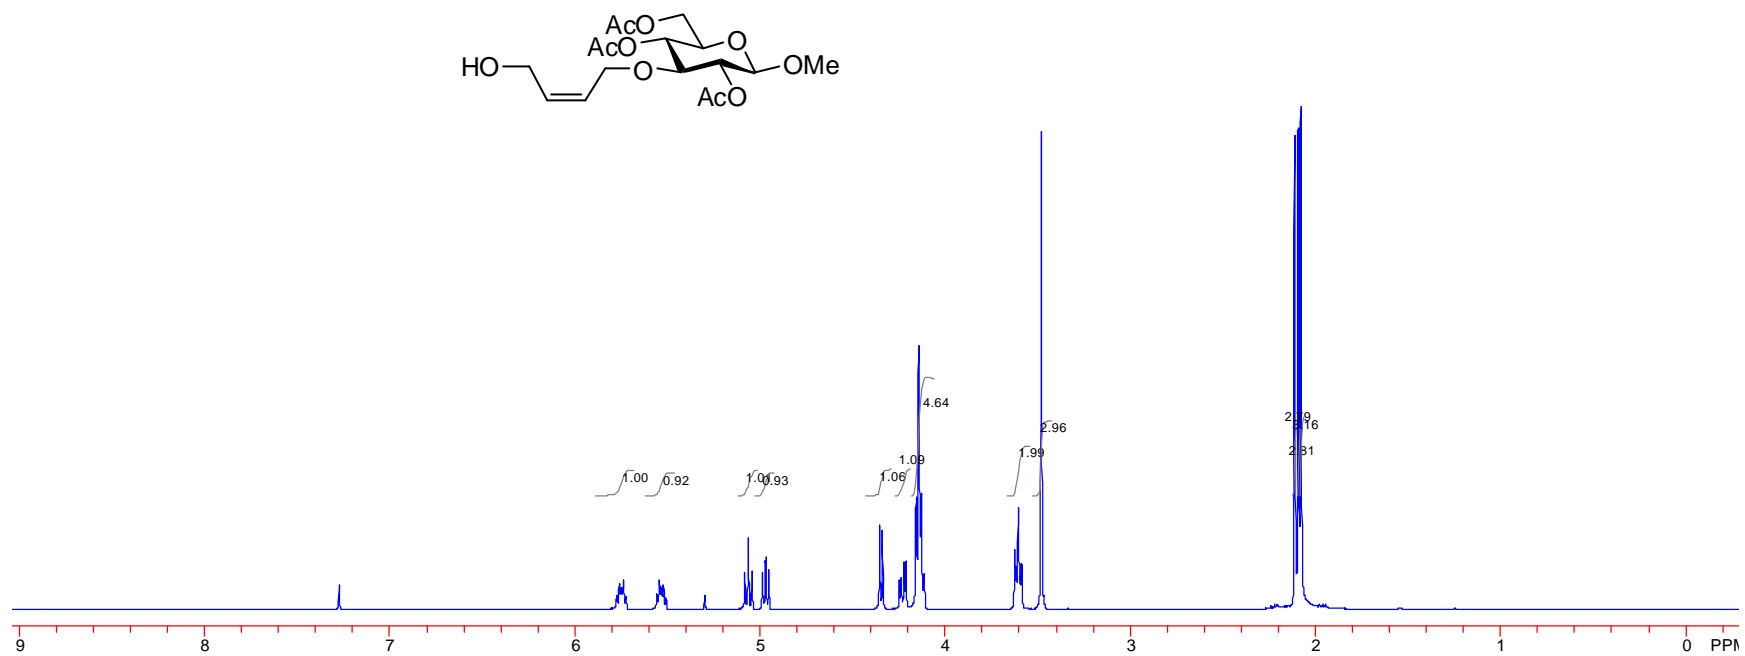

S-38

$^{13}\text{C}$ -NMR spectrum ( $\text{CDCl}_3$ , 125 MHz) Methyl 2,4,6-tri-*O*-acetyl-3-*O*-[4-hydroxy-2-*Z*-butenyl]- $\beta$ -D-glucopyranoside (**28**).

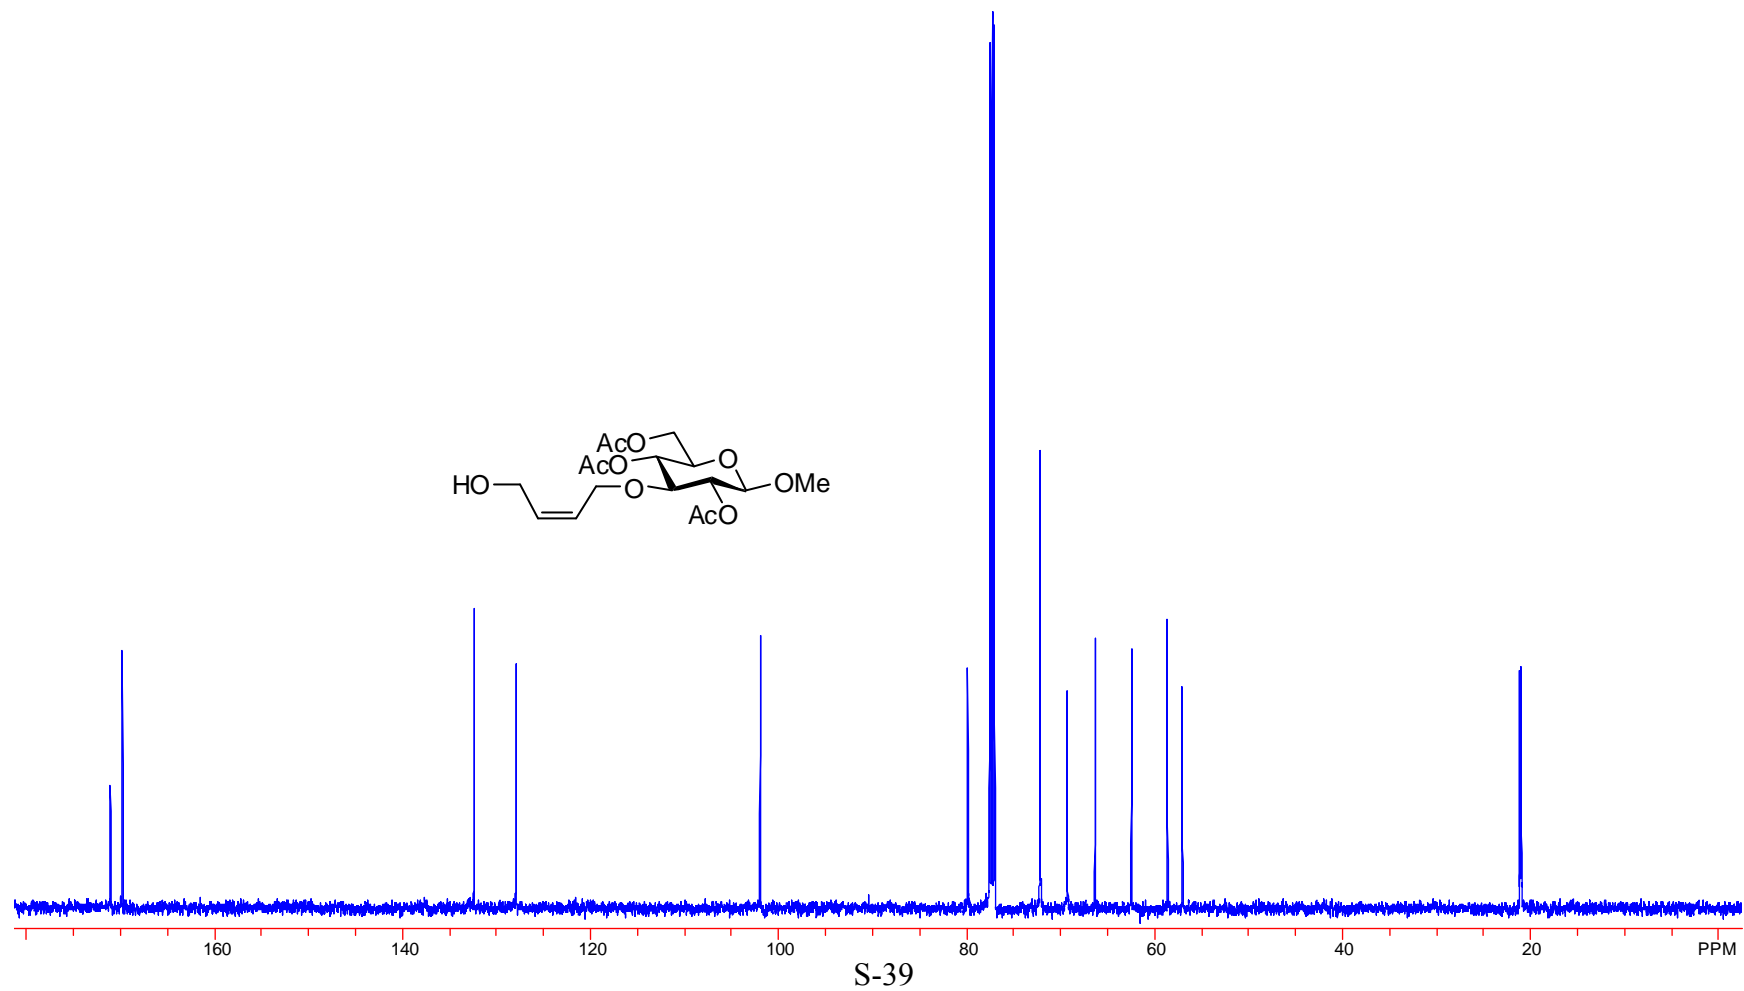

<sup>1</sup>H-NMR spectrum (CDCl<sub>3</sub>, 500 MHz) Methyl 2,4,6-tri-*O*-acetyl-3-*O*-[4-(phenyloxythionocarbonyloxy)-2-*Z*-butenyl]-β-D-glucopyranoside (**29**).

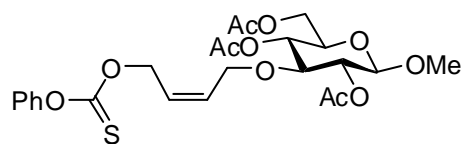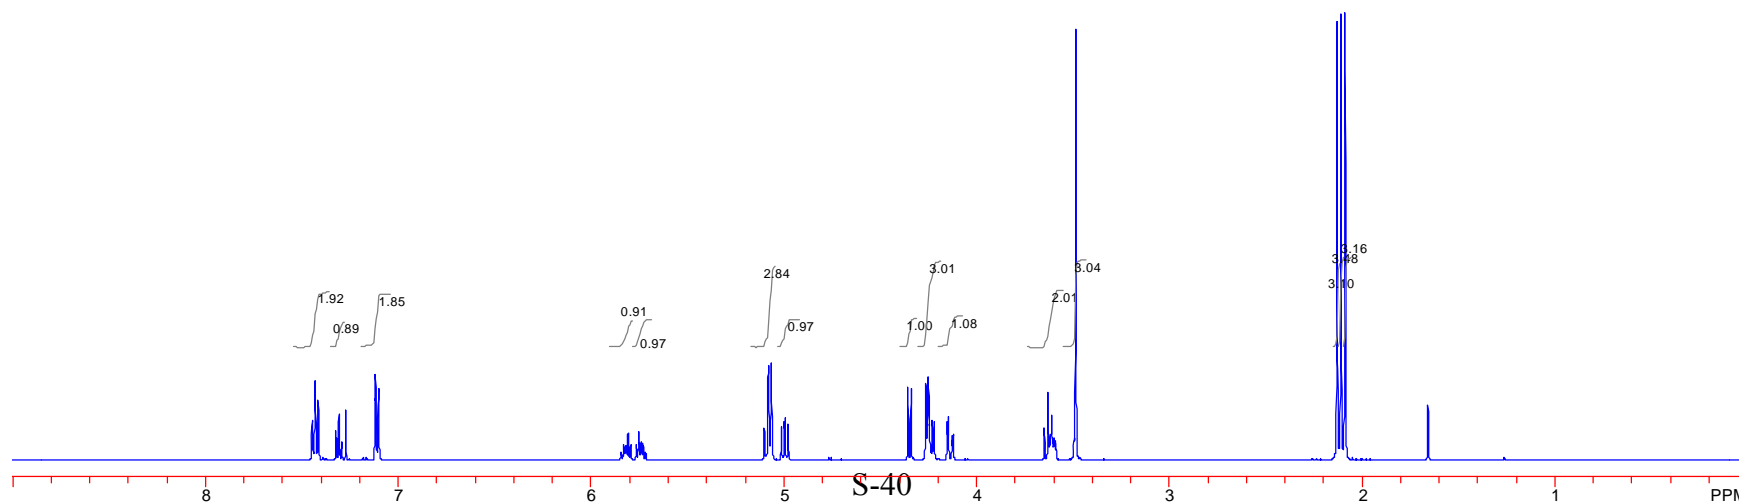



$^{13}\text{C}$ -NMR spectrum ( $\text{CDCl}_3$ , 125 MHz) Methyl 2,4,6-tri-*O*-acetyl-3-*O*-[4-(phenyloxythionocarbonyloxy)-2-*Z*-butenyl]- $\beta$ -D-glucopyranoside (**29**).

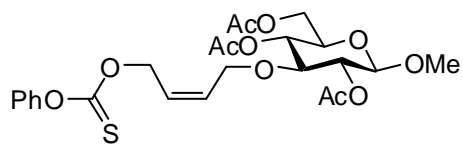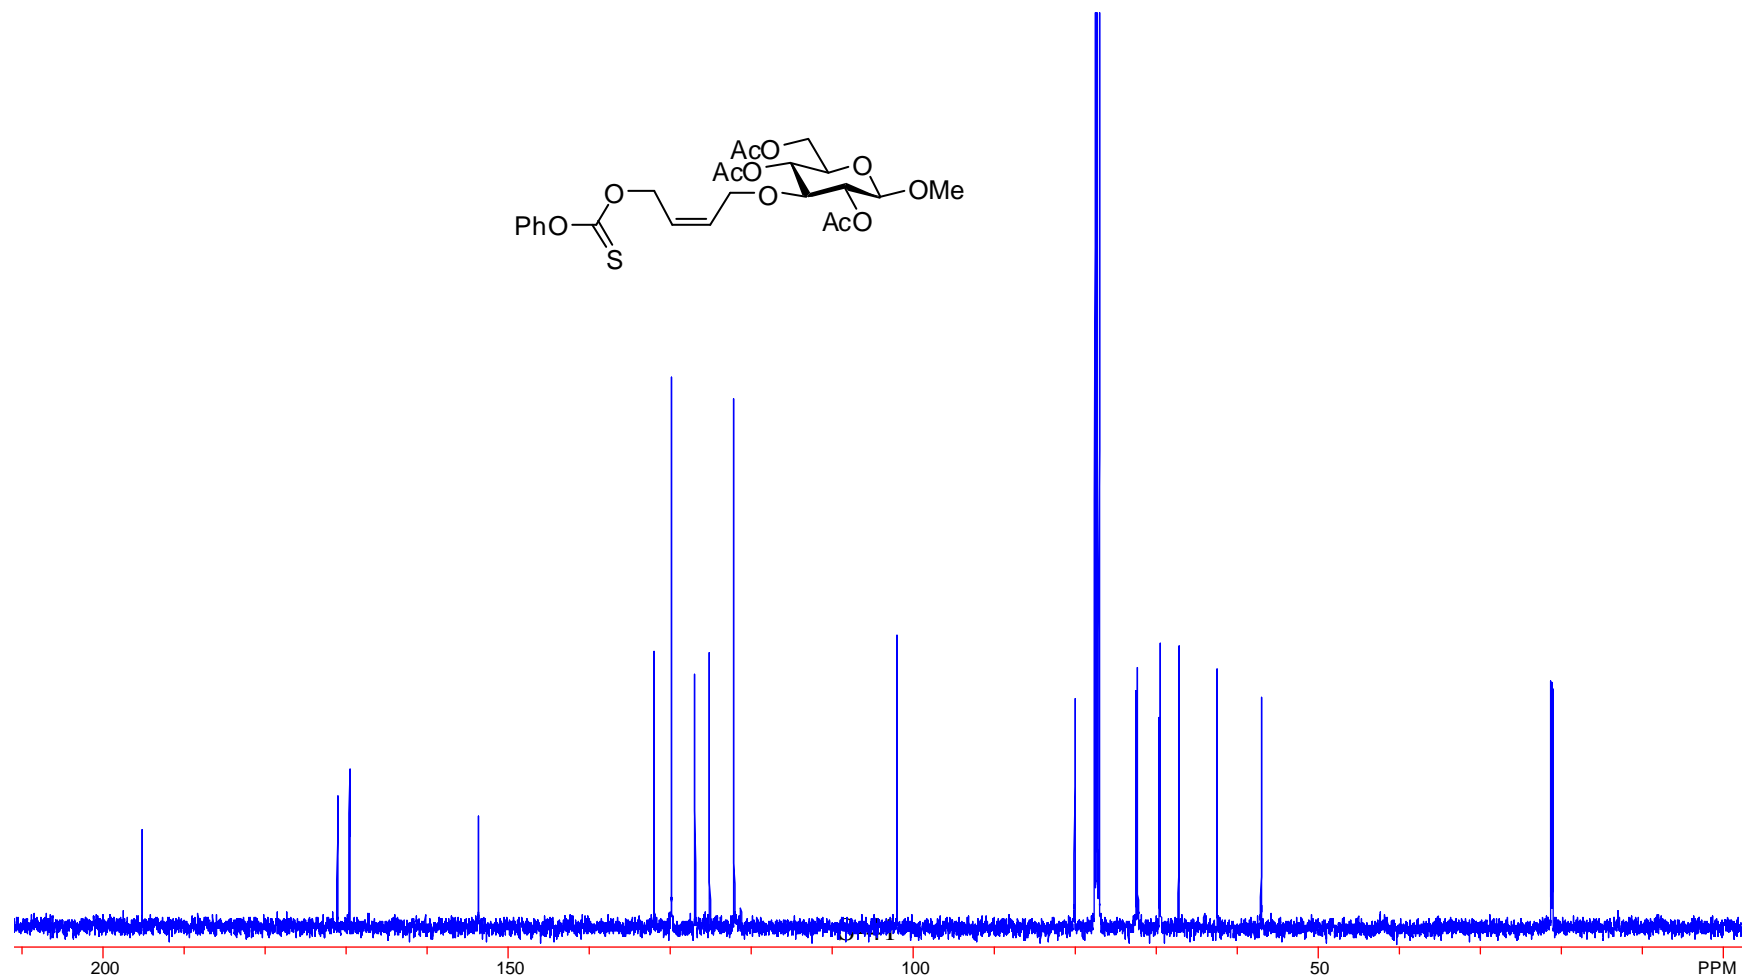

$^1\text{H-NMR}$  spectrum ( $\text{CDCl}_3$ , 500 MHz) Methyl 2,4,6-tri-*O*-acetyl-3-*O*-[(2-phenyloxycarbonylthioxy)-3-butenyl]- $\beta$ -D-glucopyranoside (**30**).

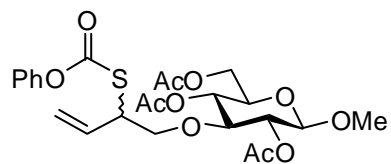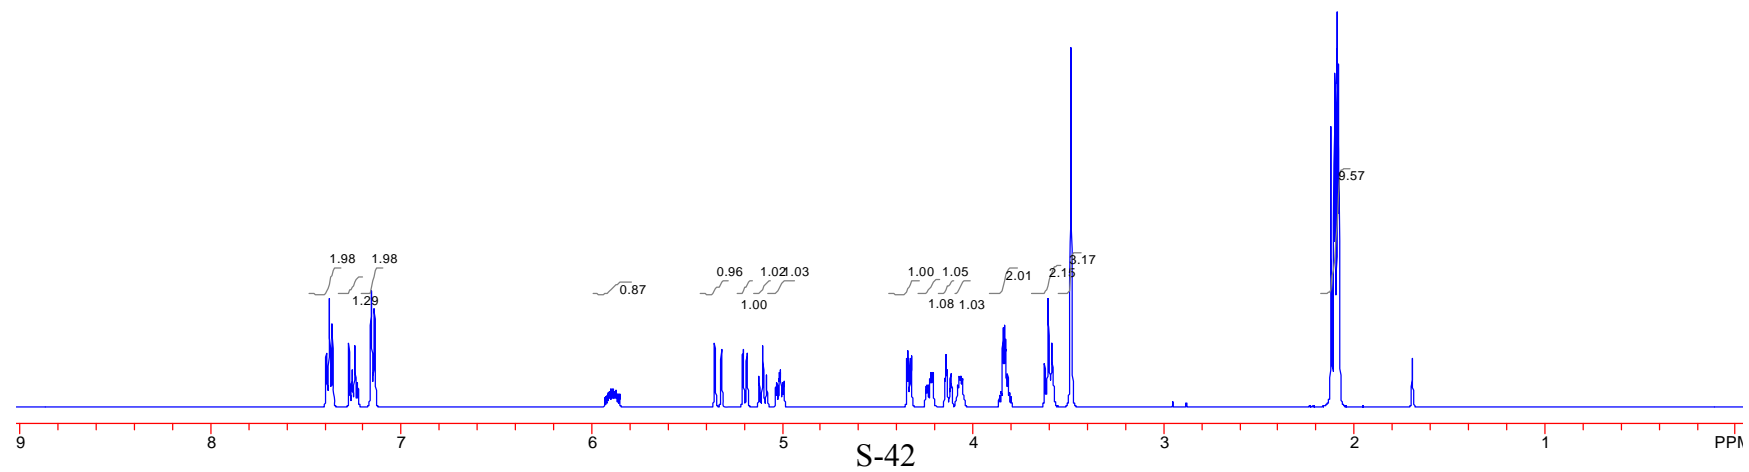

$^{13}\text{C}$ -NMR spectrum ( $\text{CDCl}_3$ , 125 MHz) Methyl 2,4,6-tri-*O*-acetyl-3-*O*-[(2-phenyloxycarbonylthioxy)-3-butenyl]- $\beta$ -D-glucopyranoside (**30**).

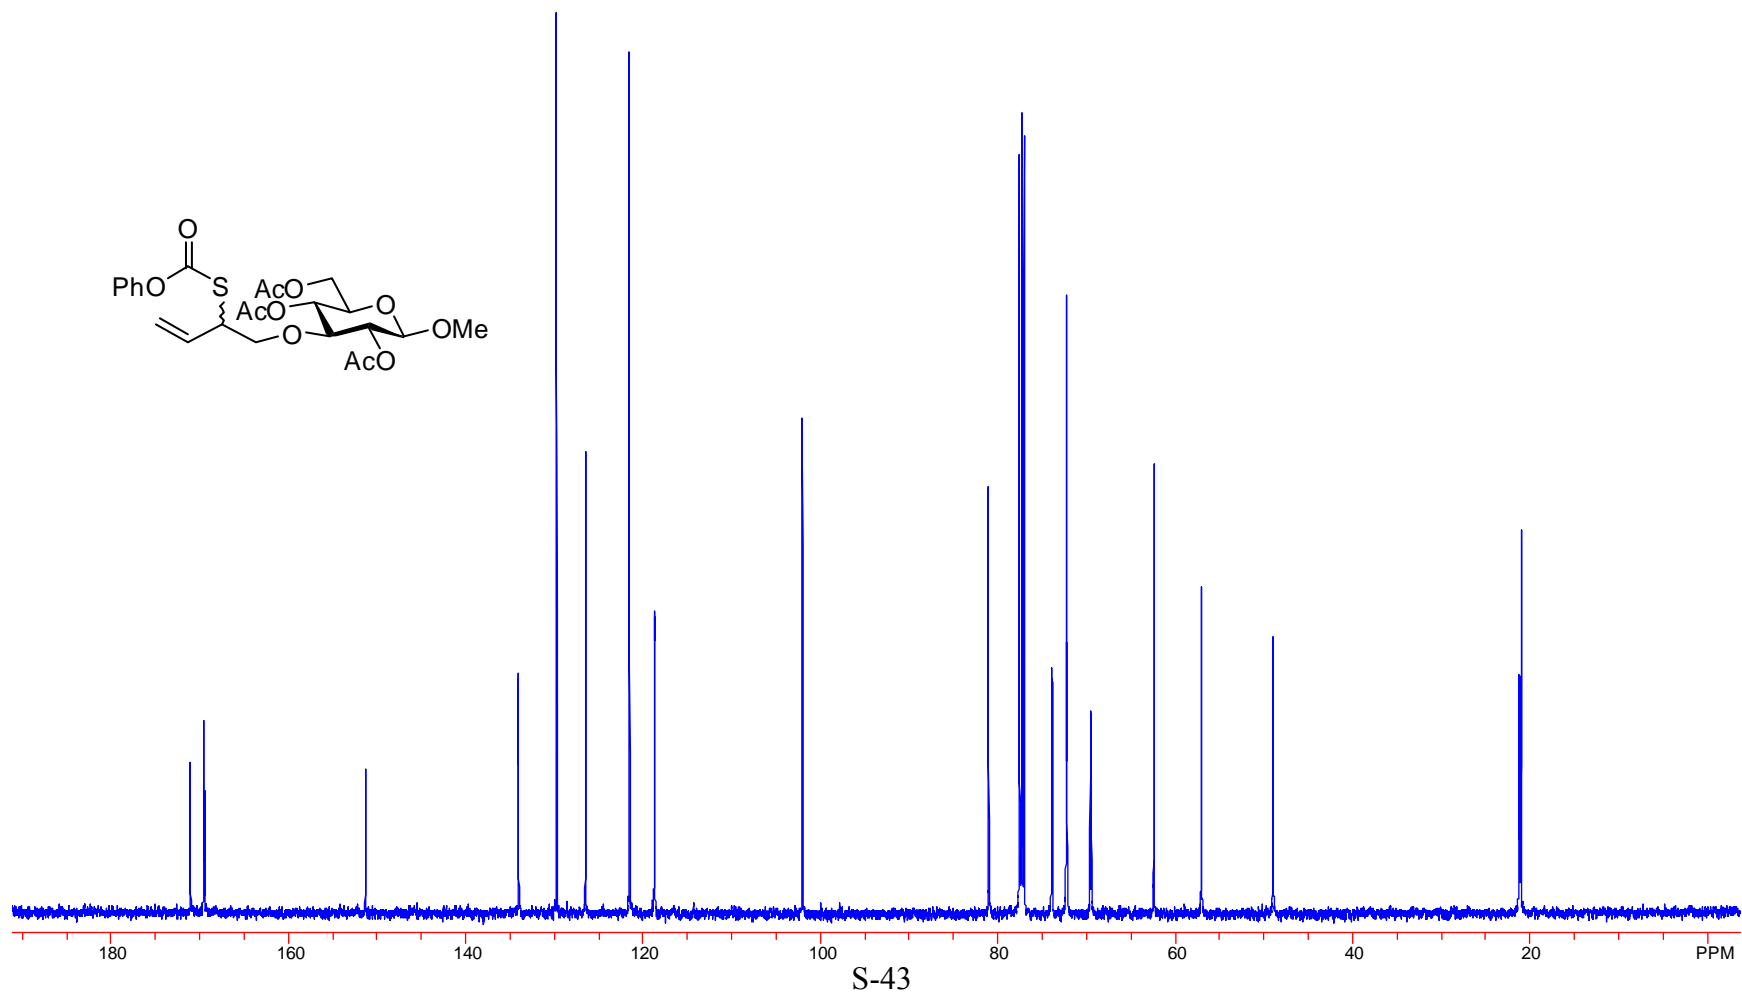

$^1\text{H-NMR}$  spectrum ( $\text{CD}_3\text{OD}$ , 500 MHz) Methyl 3-*O*-[(2-pyridyldithio)-3-butenyl]- $\beta$ -D-glucopyranoside (**31**).

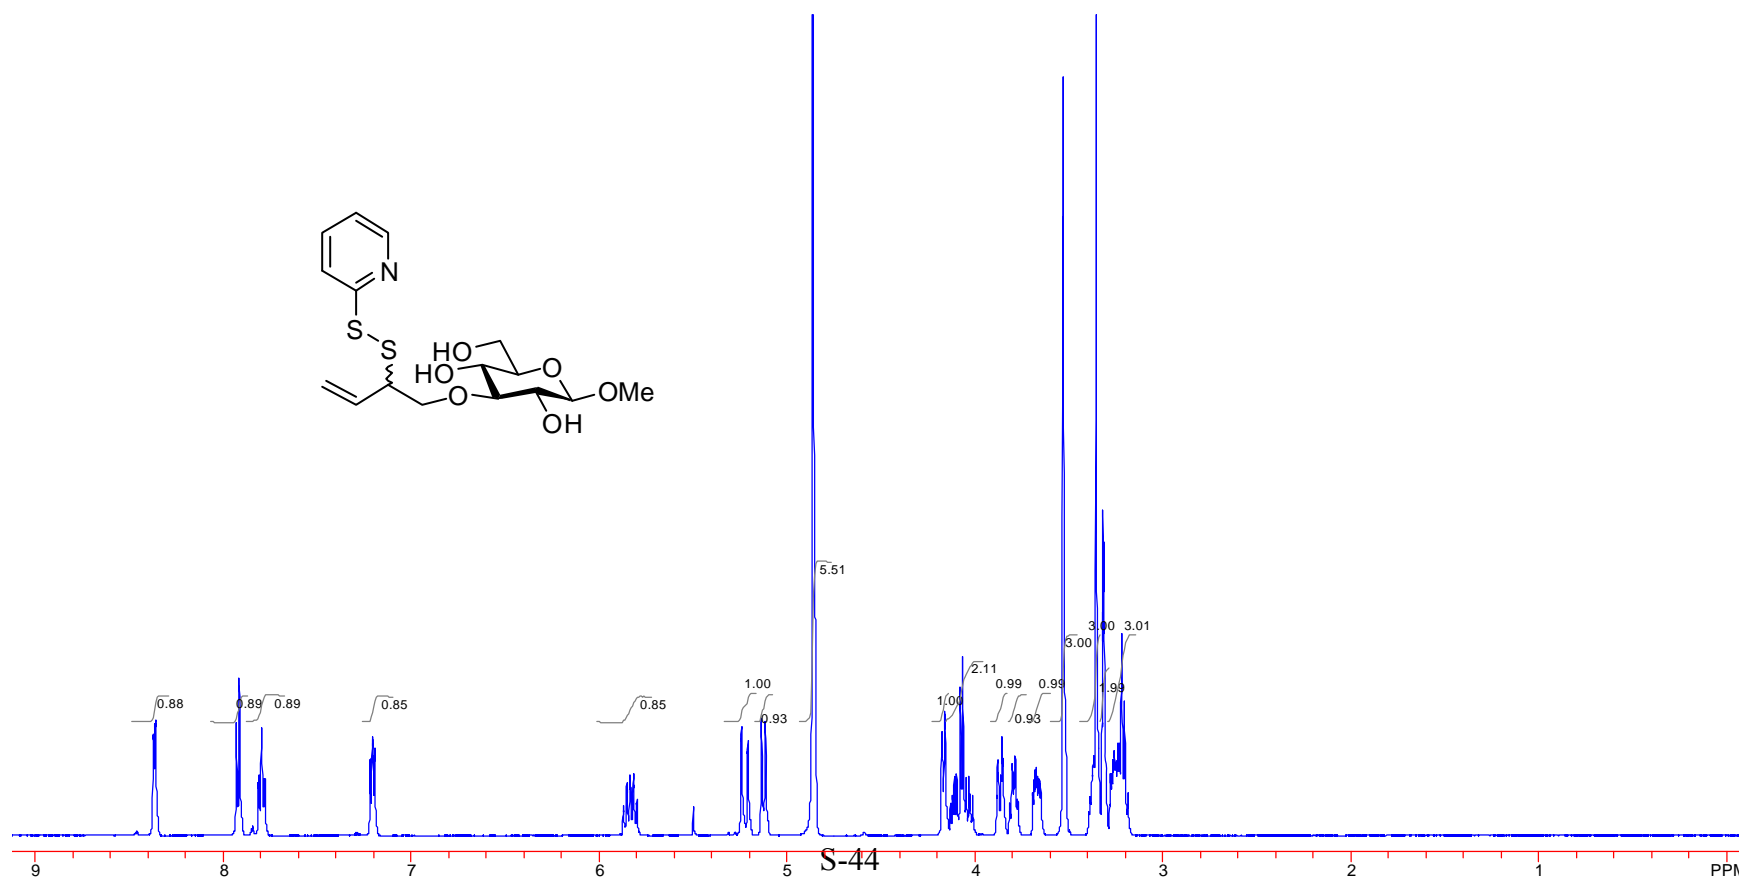

$^{13}\text{C}$ -NMR spectrum ( $\text{CD}_3\text{OD}$ , 125 MHz) Methyl 3-*O*-[(2-pyridyldithio)-3-butenyl]- $\beta$ -D-glucopyranoside (**31**).

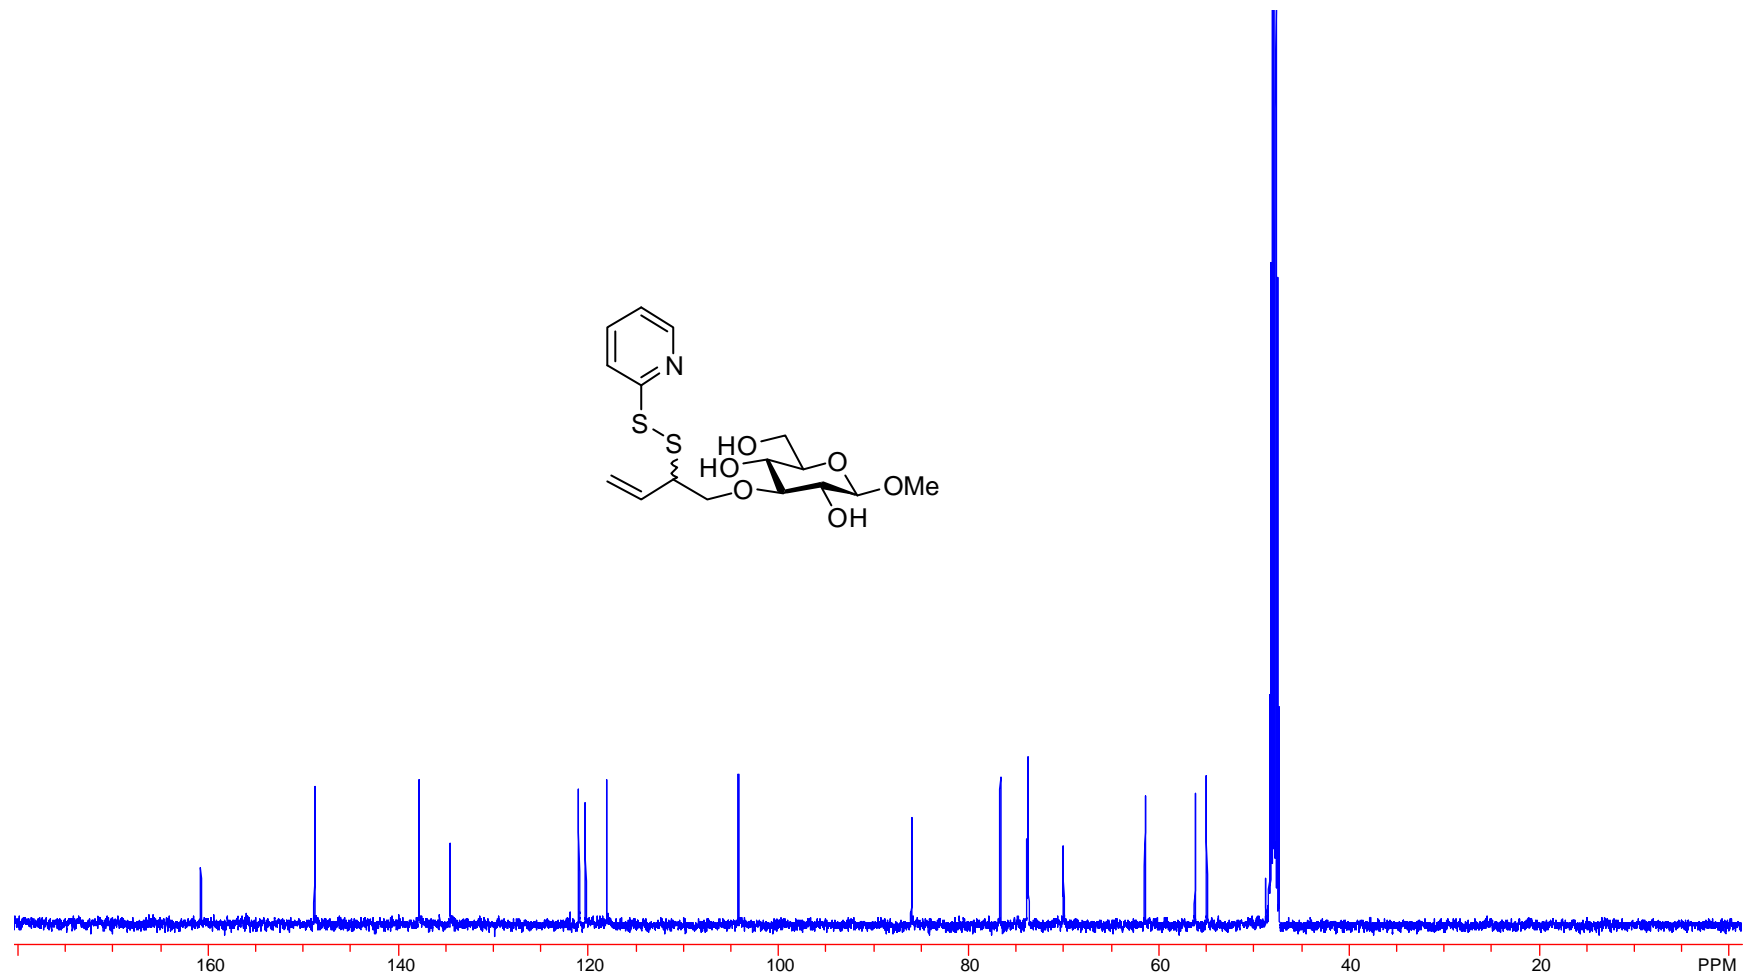

S-45

$^1\text{H}$ -NMR spectrum ( $\text{CD}_3\text{OD}$ , 400 MHz) Methyl 6-acetylthio- $\alpha$ -D-glucopyranoside (**32**)

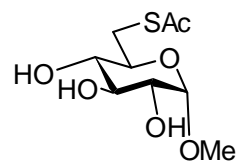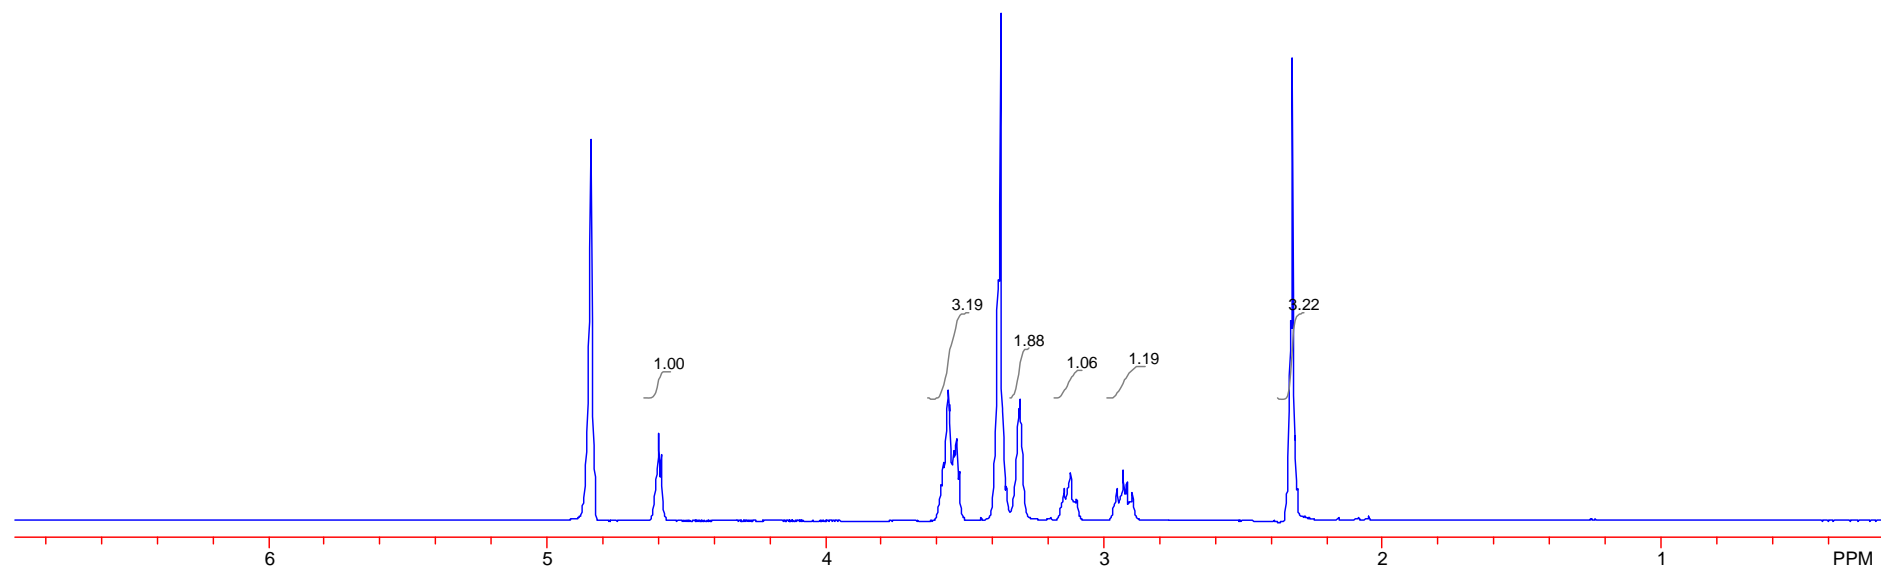

$^{13}\text{C}$ -NMR spectrum ( $\text{CD}_3\text{OD}$ , 100 MHz) Methyl 6-acetylthio- $\alpha$ -D-glucopyranoside (**32**)

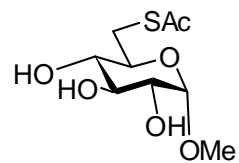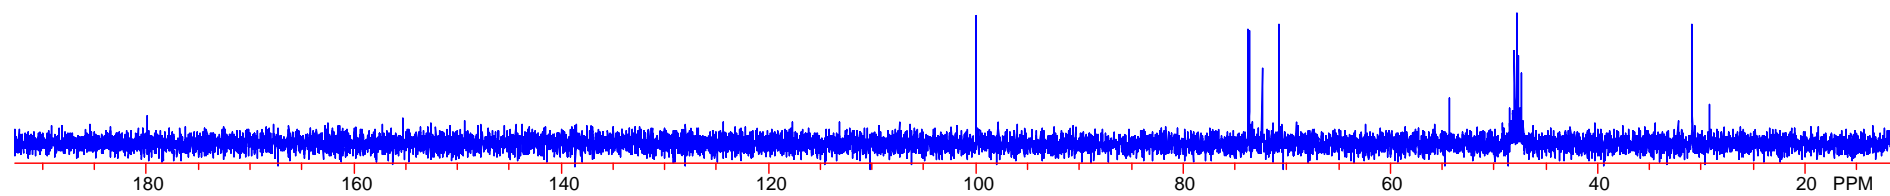

$^1\text{H-NMR}$  spectrum ( $\text{CD}_3\text{OD}$ , 400 MHz) Methyl 2-acetamido-6-acetylthio-2-deoxy- $\beta$ -D-glucopyranoside (**33**).

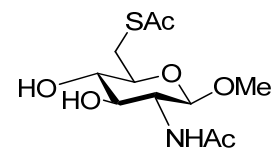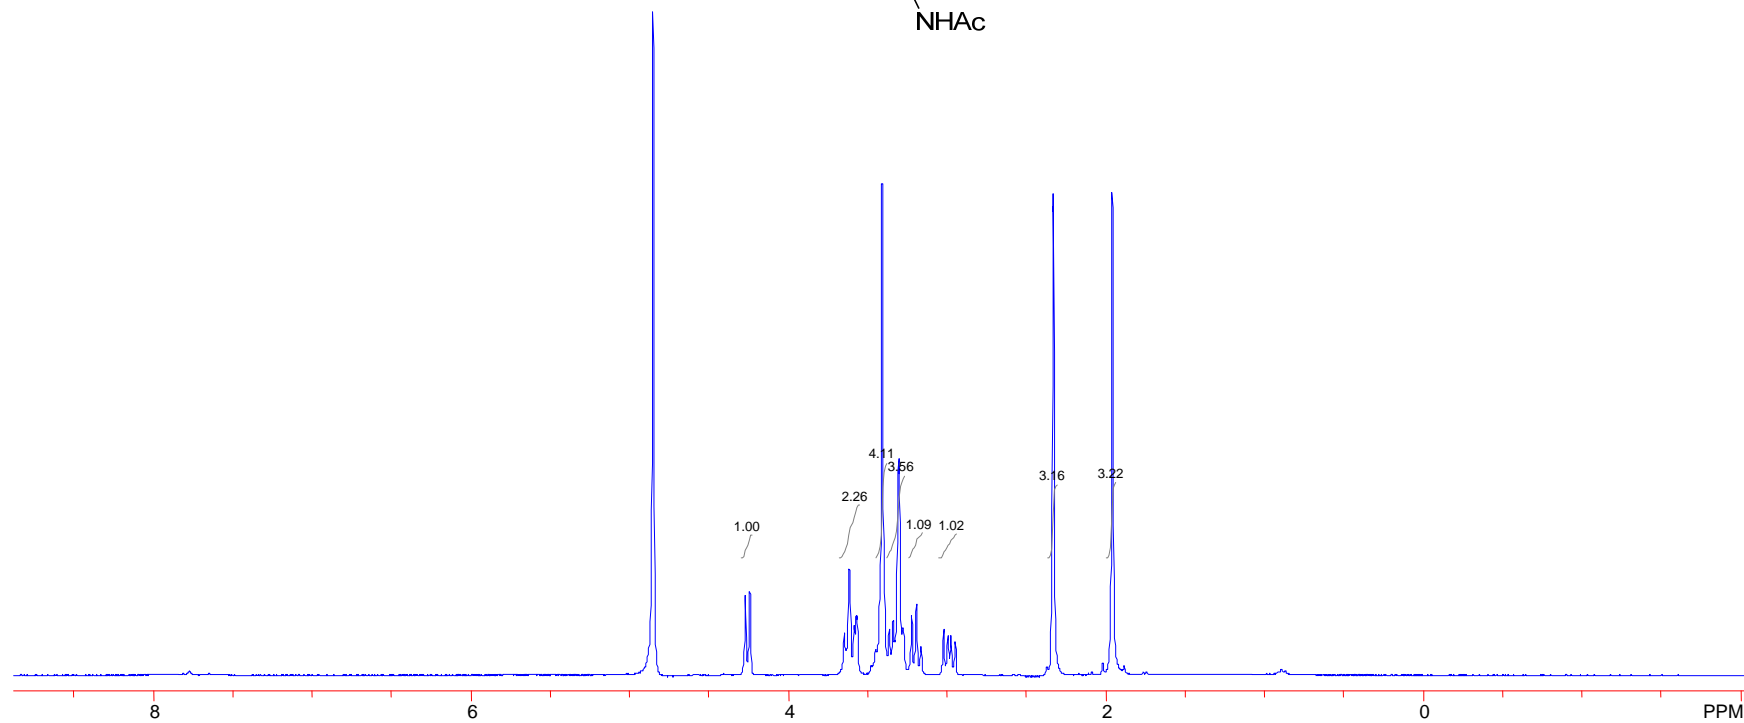



$^{13}\text{C}$ -NMR spectrum ( $\text{CD}_3\text{OD}$ , 100 MHz) Methyl 2-acetamido-6-acetylthio-2-deoxy- $\beta$ -D-glucopyranoside (**33**).

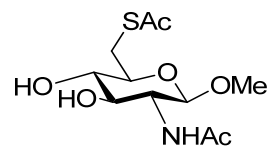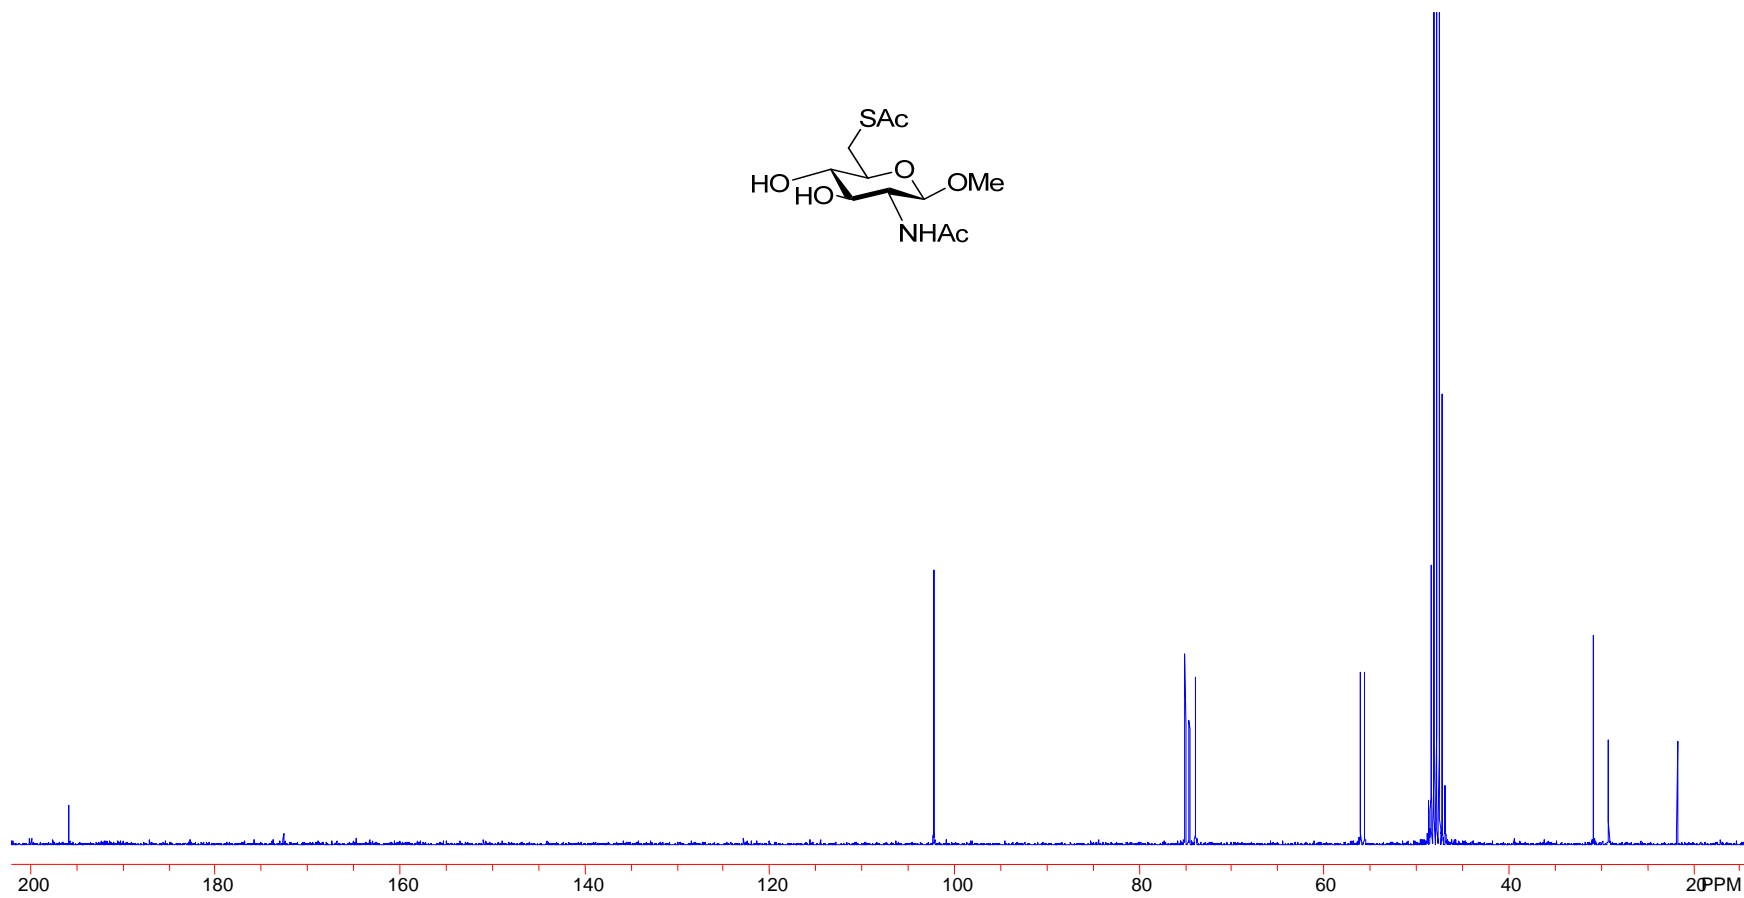

$^1\text{H-NMR}$  spectrum ( $\text{CDCl}_3$ , 500 MHz) 2,4,6-Tri-*O*-acetyl-3-acetylthio- $\alpha,\beta$ -D-glucopyranose (**35**).

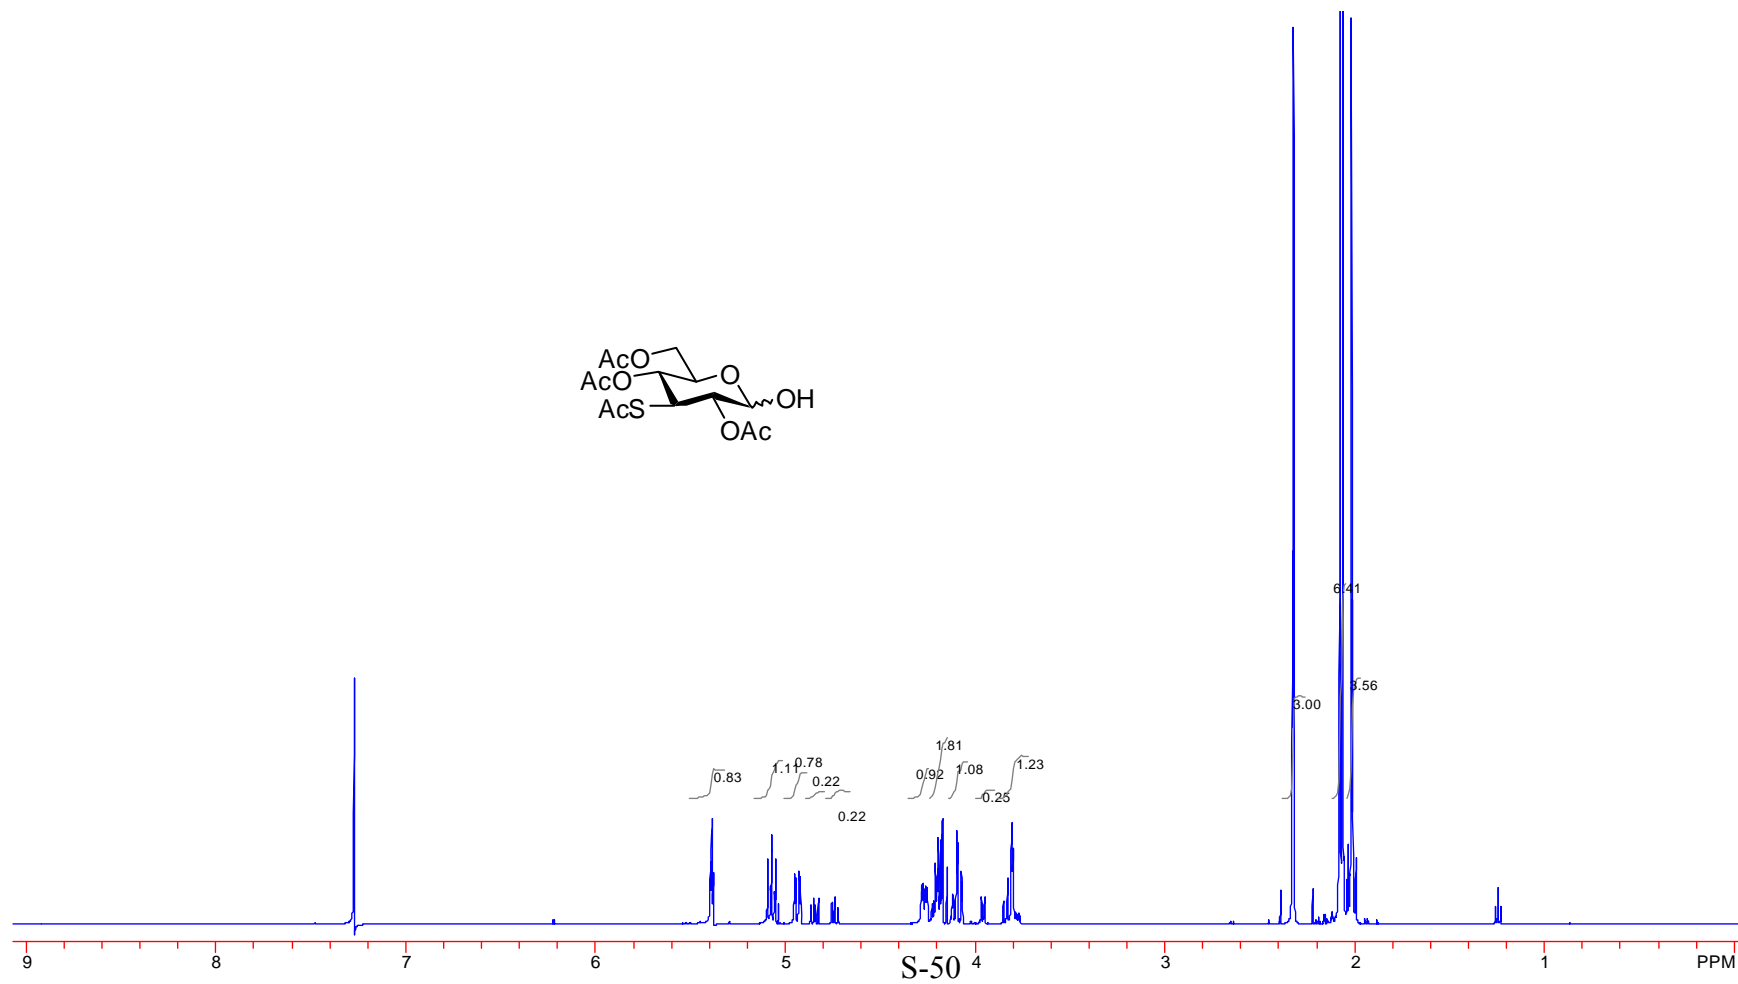

$^{13}\text{C}$ -NMR spectrum ( $\text{CDCl}_3$ , 125 MHz) 2,4,6-Tri-*O*-acetyl-3-acetylthio- $\alpha,\beta$ -D-glucopyranose (**35**).

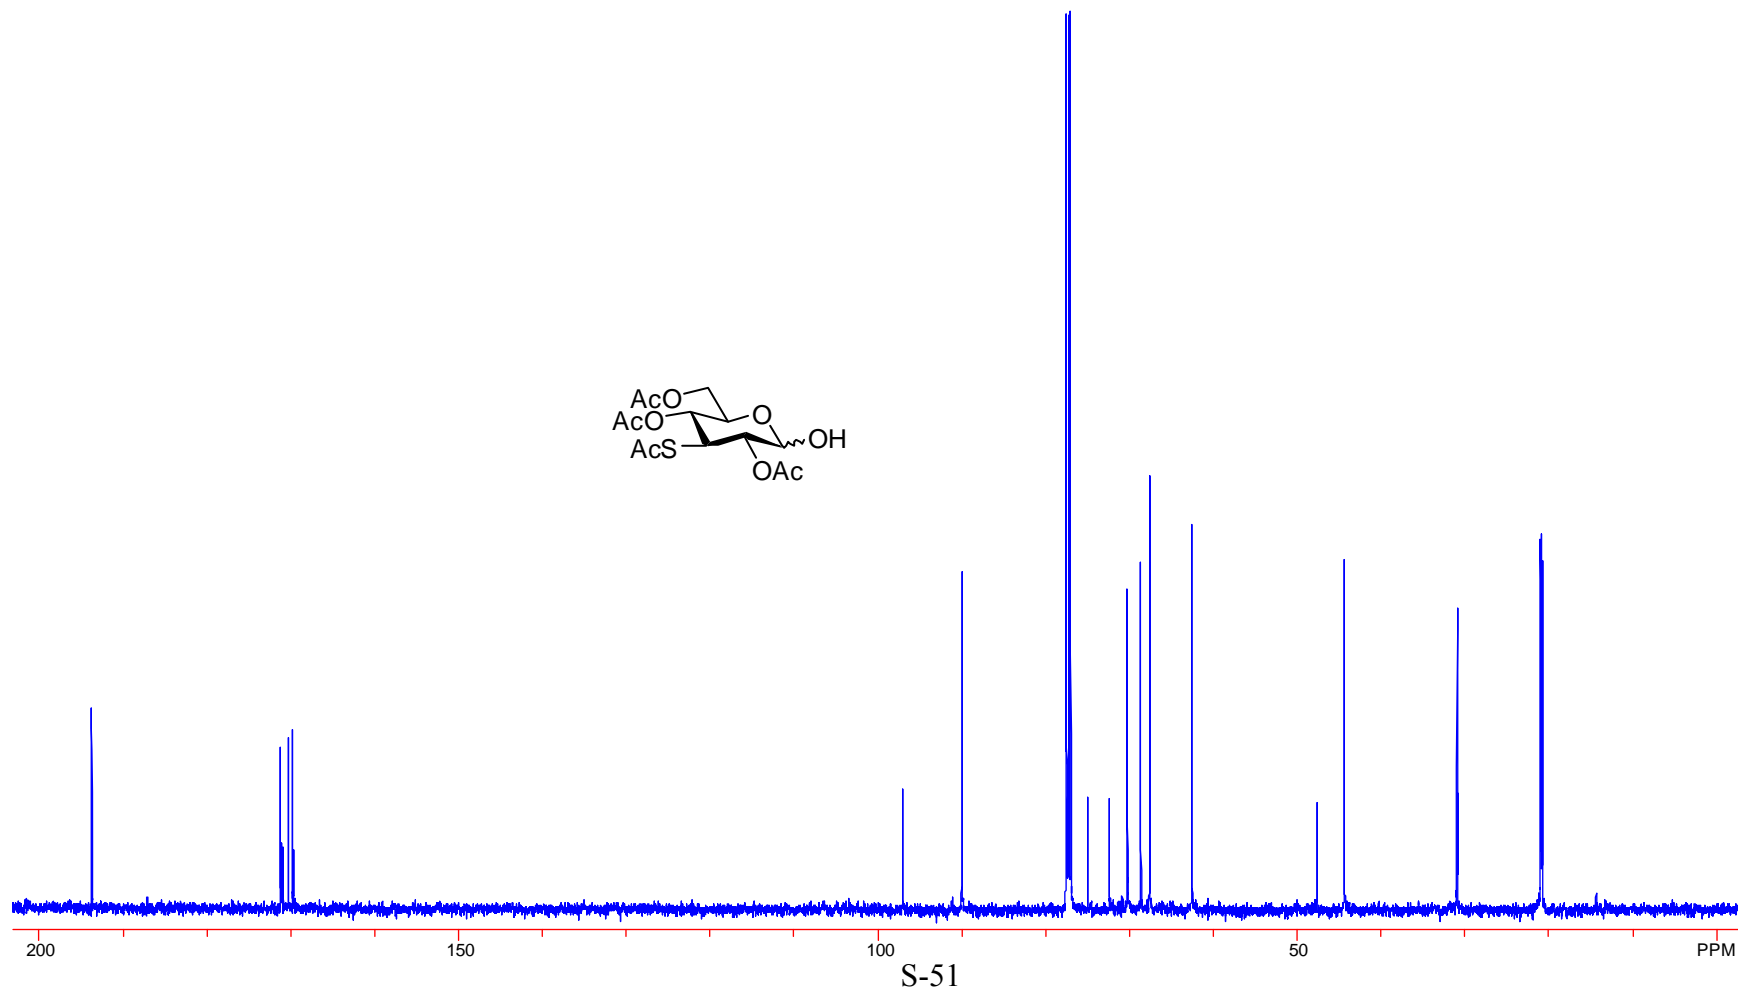

$^1\text{H-NMR}$  spectrum ( $\text{CDCl}_3$ , 500 MHz) 2,4,6-Tri-*O*-acetyl-3-acetylthio- $\alpha$ -D-glucopyranosyl trichloroacetimidate (**36**).

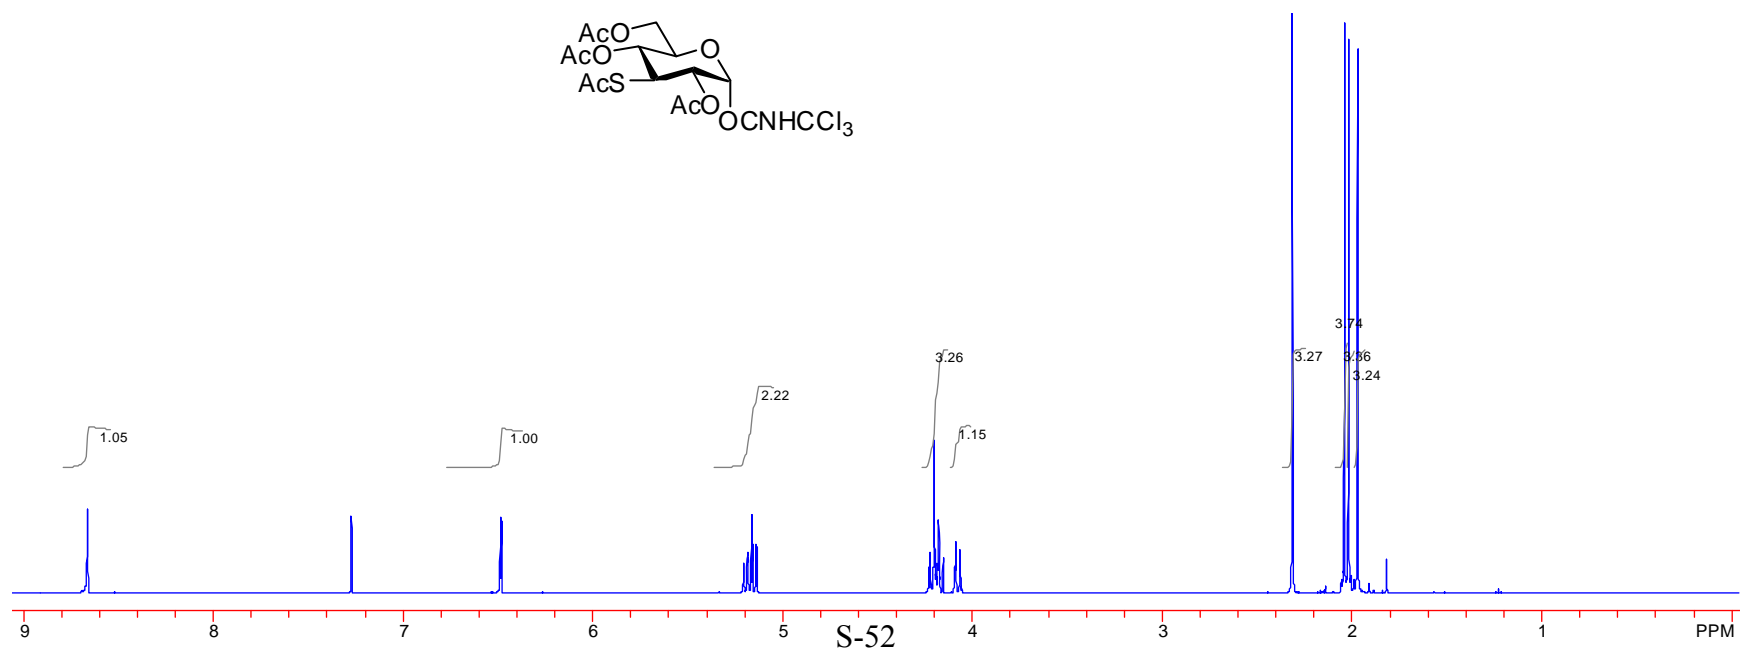

$^{13}\text{C}$ -NMR spectrum ( $\text{CDCl}_3$ , 125 MHz) 2,4,6-Tri-*O*-acetyl-3-acetylthio- $\alpha$ -D-glucopyranosyl trichloroacetimidate (**36**).

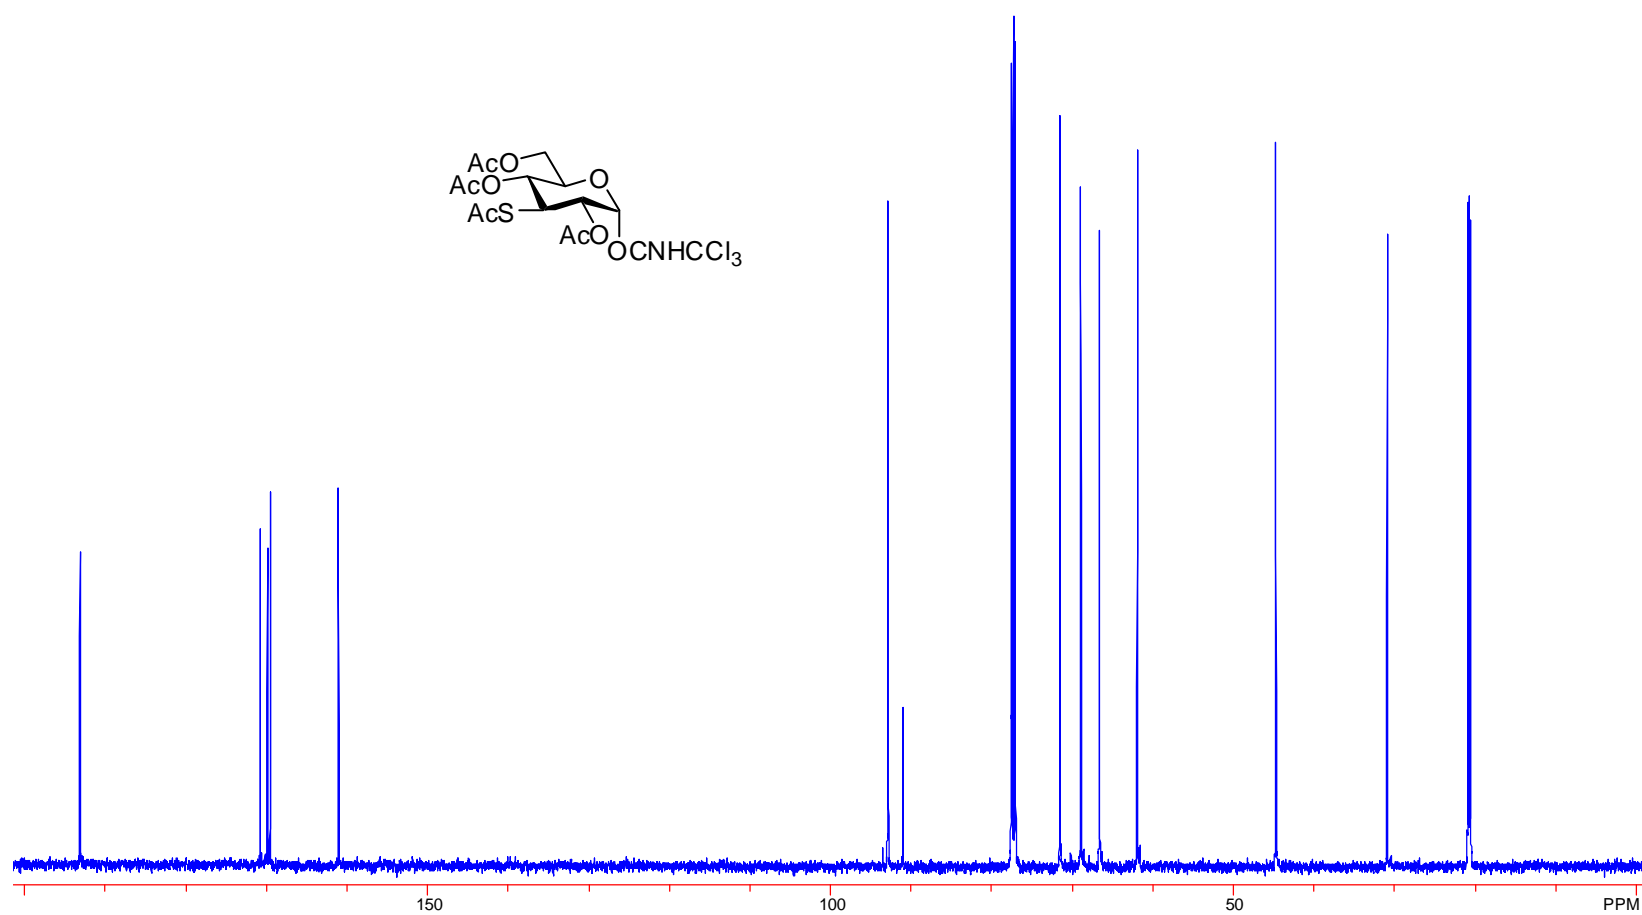

S-53

$^1\text{H-NMR}$  spectrum ( $\text{CDCl}_3$ , 500 MHz) Methyl 2,4,6-tri-*O*-acetyl-3-acetylthio- $\beta$ -D-glucopyranoside (**37**).

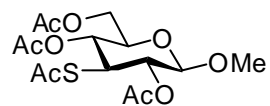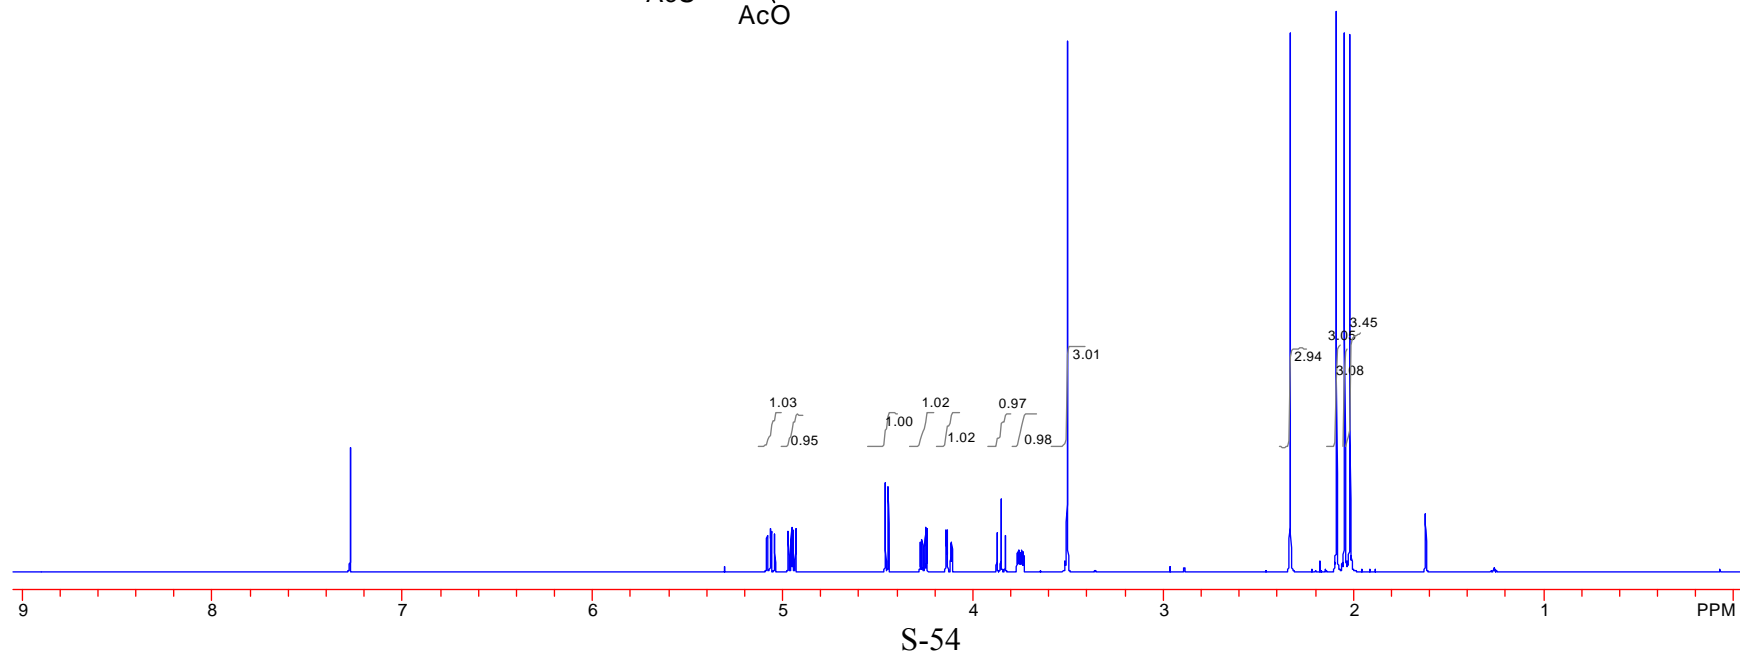

$^{13}\text{C}$ -NMR spectrum ( $\text{CDCl}_3$ , 125 MHz) Methyl 2,4,6-tri-*O*-acetyl-3-acetylthio- $\beta$ -D-glucopyranoside (**37**).

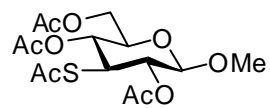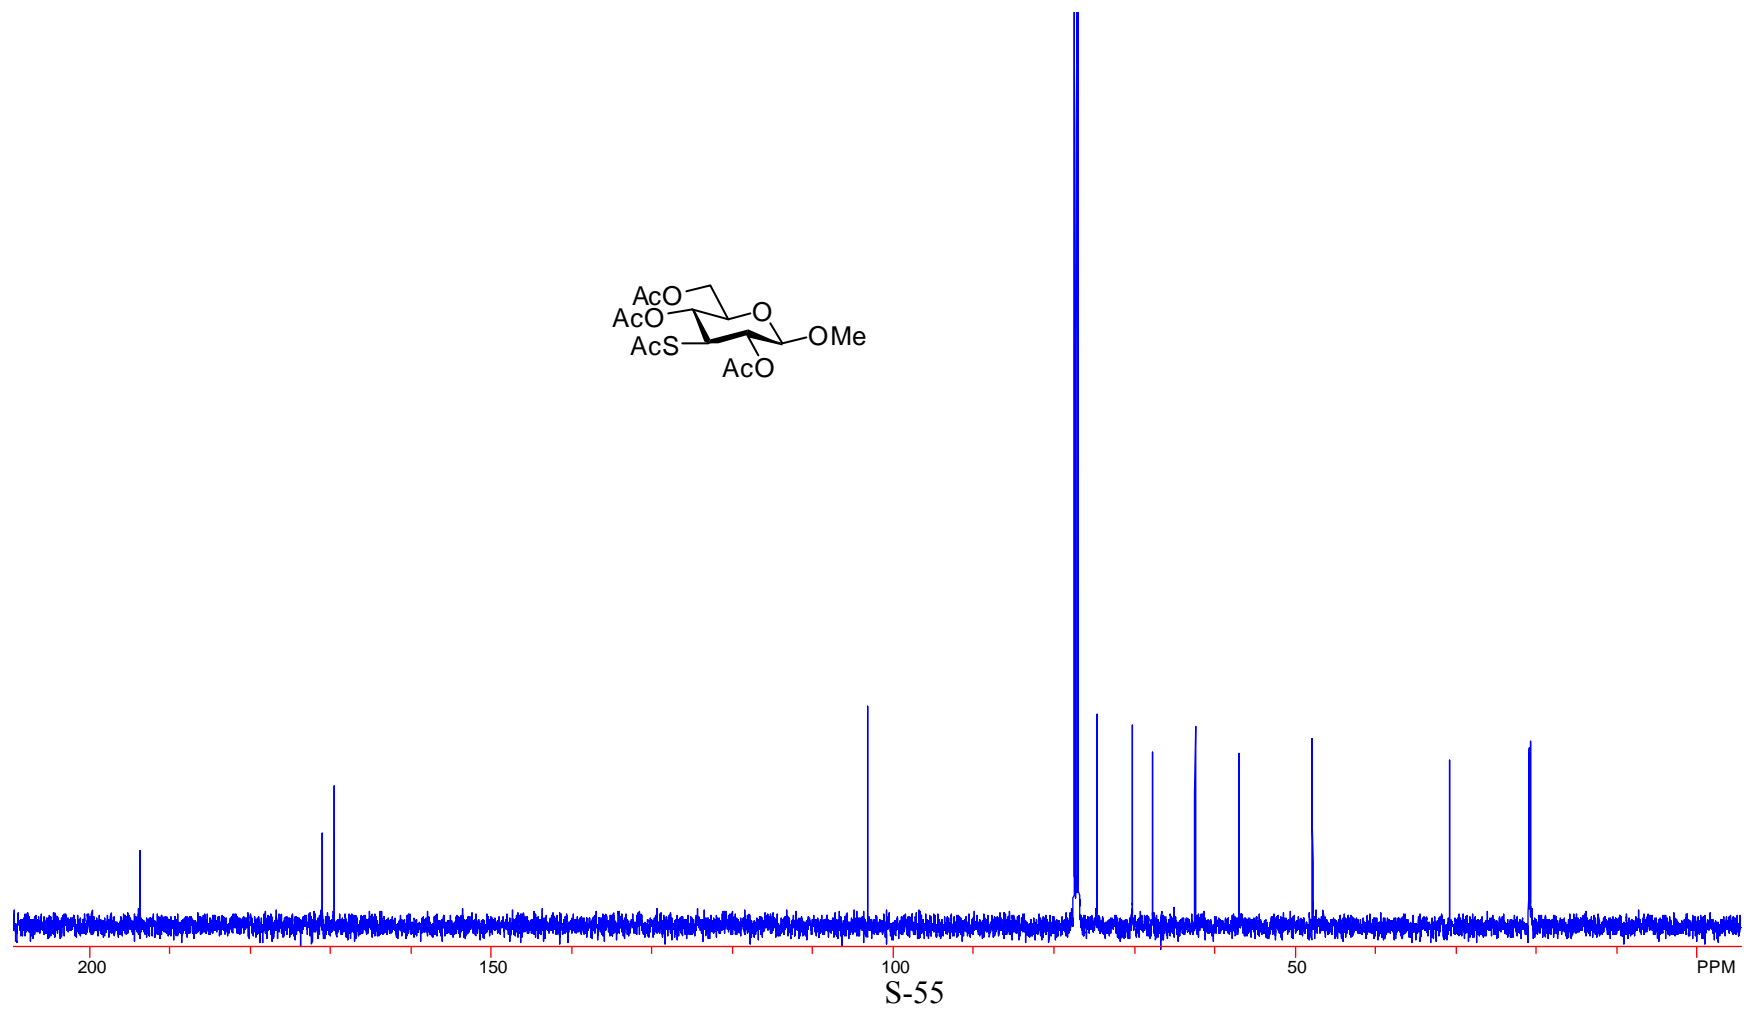

$^1\text{H-NMR}$  spectrum ( $\text{CD}_3\text{OD}$ , 500 MHz) Methyl 6-[4-( $\beta$ -D-glucopyranosyloxy)-2*E*-butenyl]-thio- $\alpha$ -D-glucopyranoside (**40**)

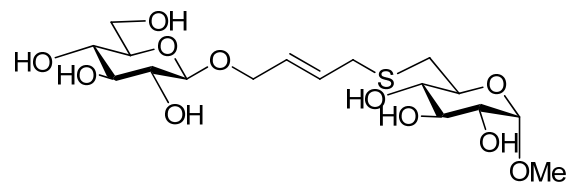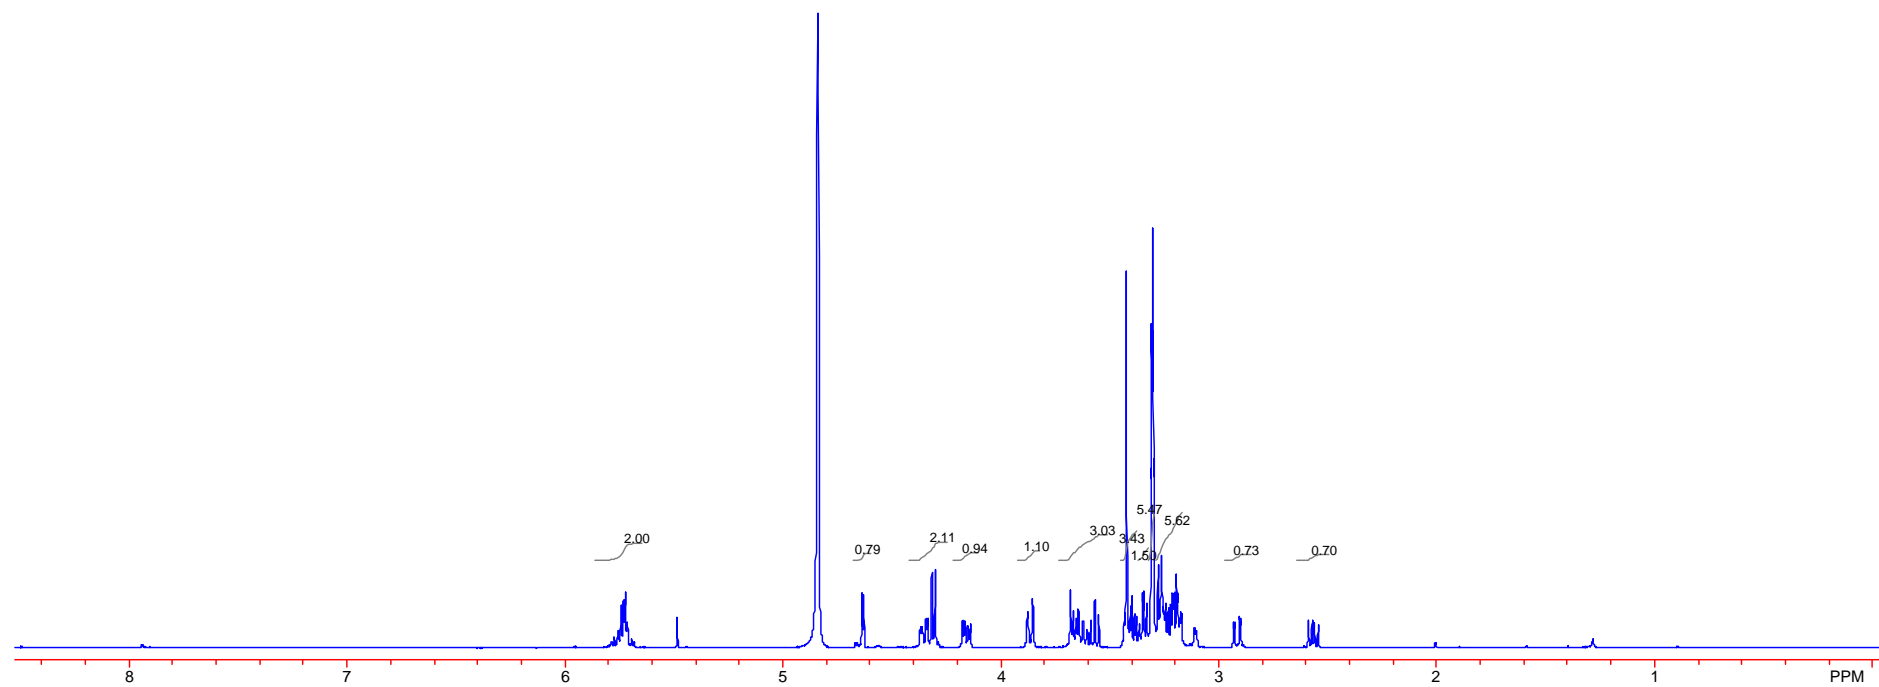

S-56



$^{13}\text{C}$ -NMR spectrum ( $\text{CD}_3\text{OD}$ , 125 MHz) Methyl 6-[4-( $\beta$ -D-glucopyranosyloxy)-2*E*-butenyl]-thio- $\alpha$ -D-glucopyranoside (**40**)

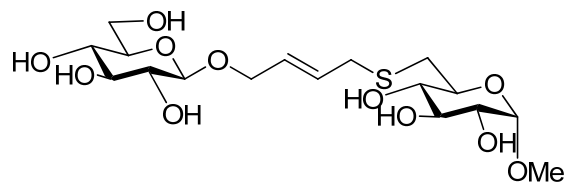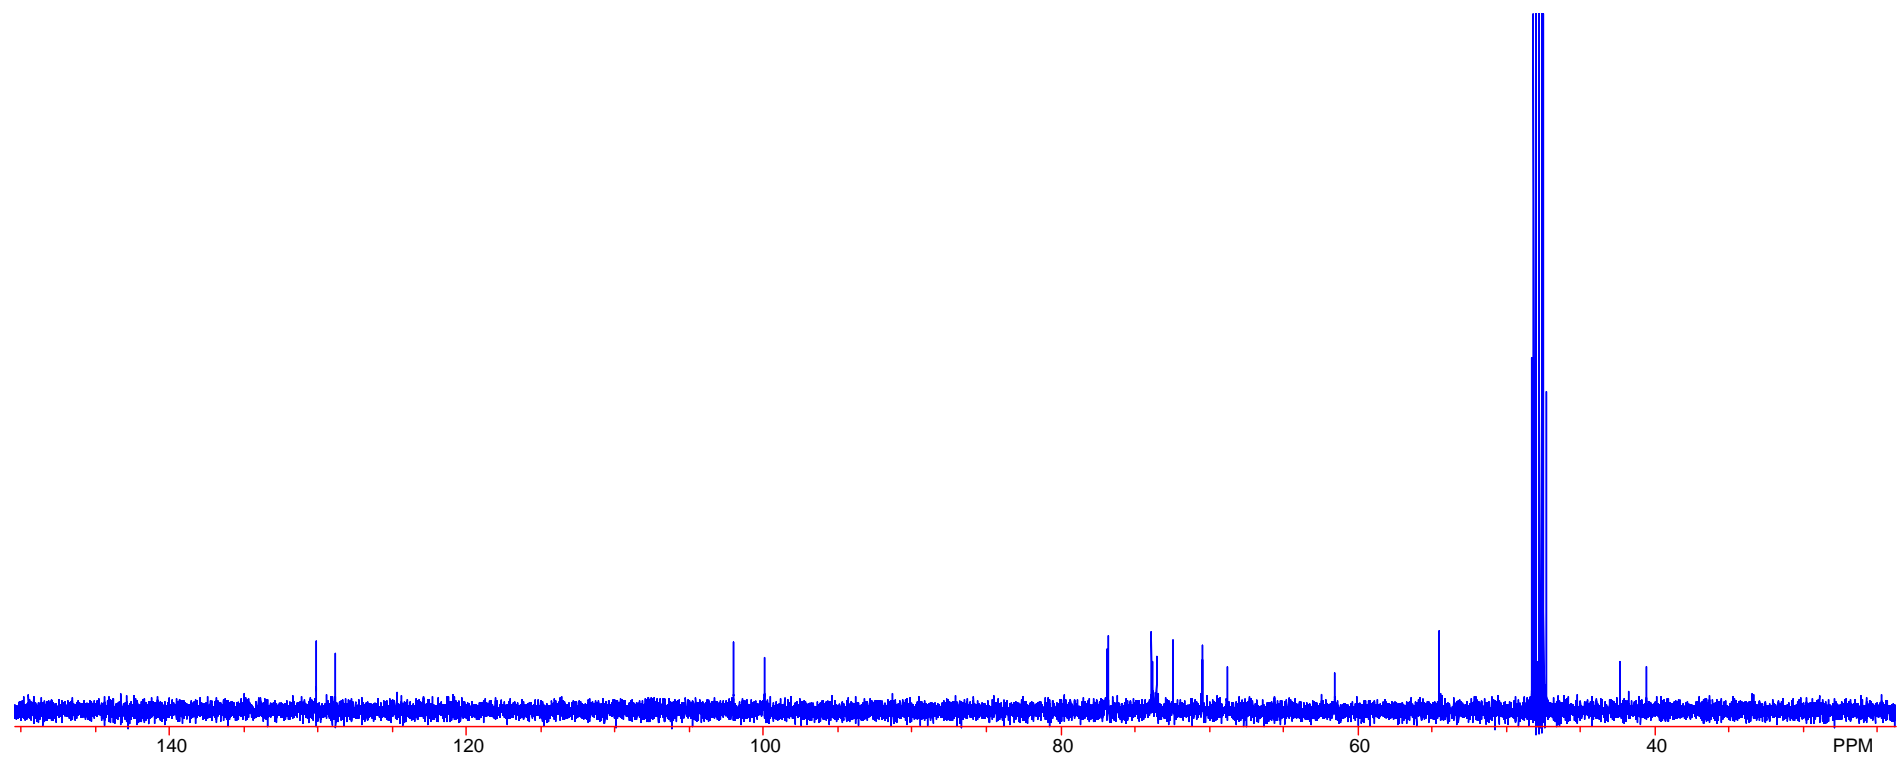

$^1\text{H-NMR}$  spectrum ( $\text{CD}_3\text{OD}$ , 400 MHz) Methyl 6-[4-(2-acetamido-2-deoxy- $\beta$ -D-glucopyranosyloxy)-2*E*-buteny]-thio-2-deoxy- $\beta$ -D-glucopyranoside (**41**).

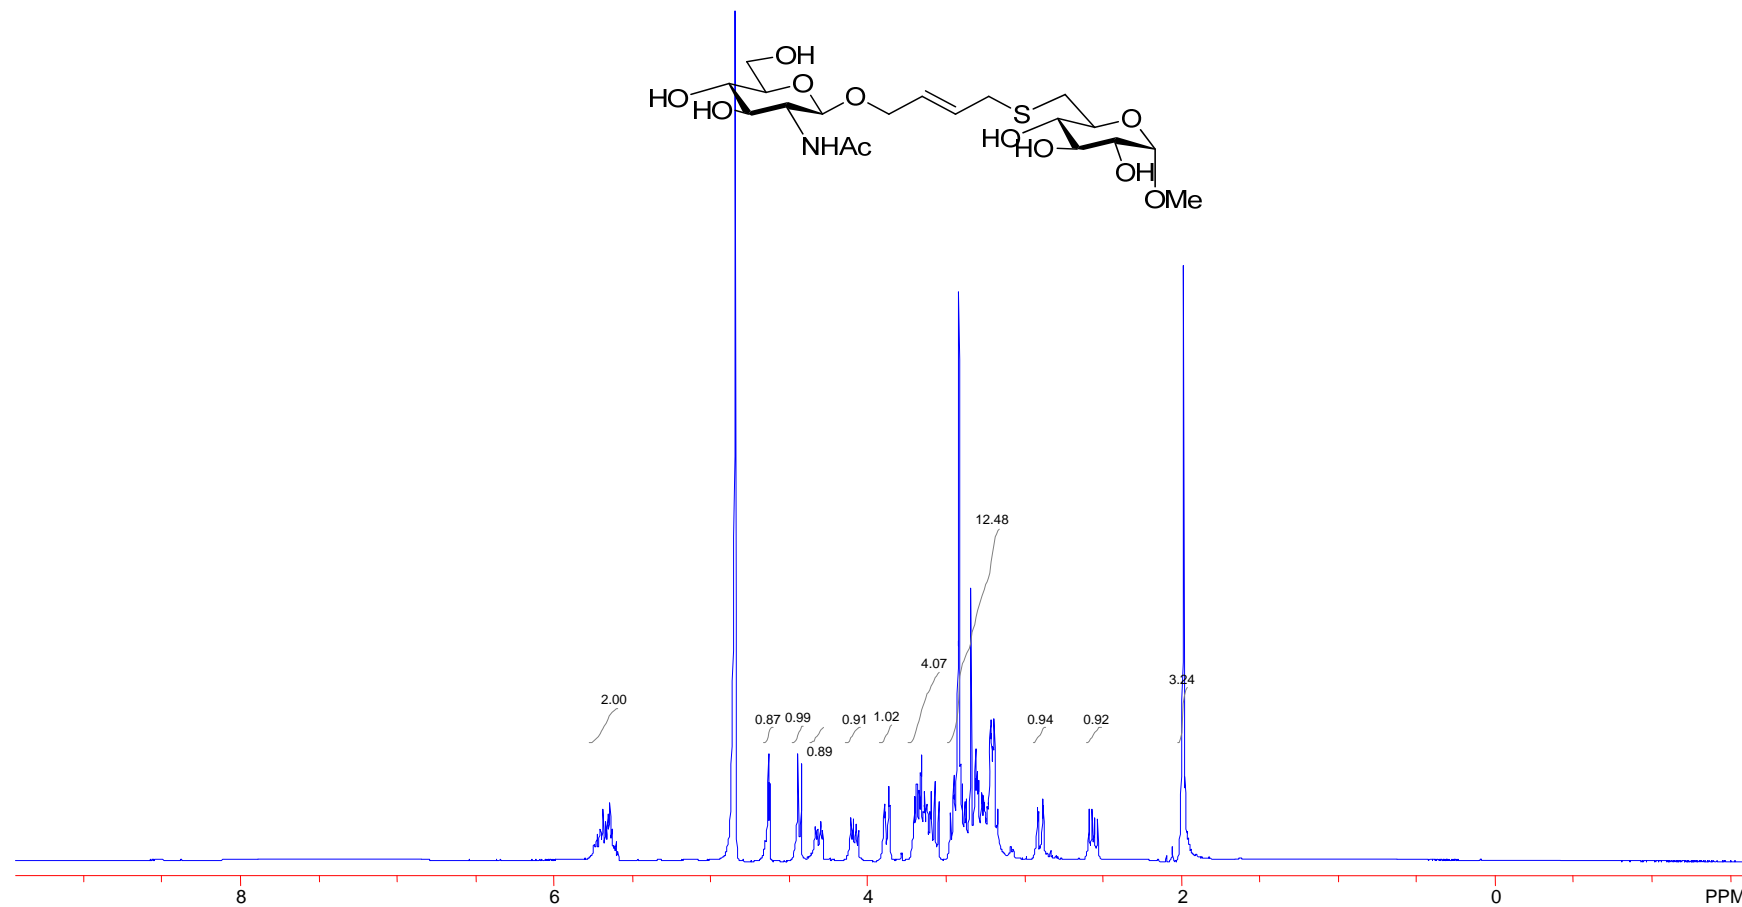

$^{13}\text{C}$ -NMR spectrum ( $\text{CD}_3\text{OD}$ , 100 MHz) Methyl 6-[4-(2-acetamido-2-deoxy- $\beta$ -D-glucopyranosyloxy)-2*E*-butenyl]-thio-2-deoxy- $\beta$ -D-glucopyranoside (**41**).

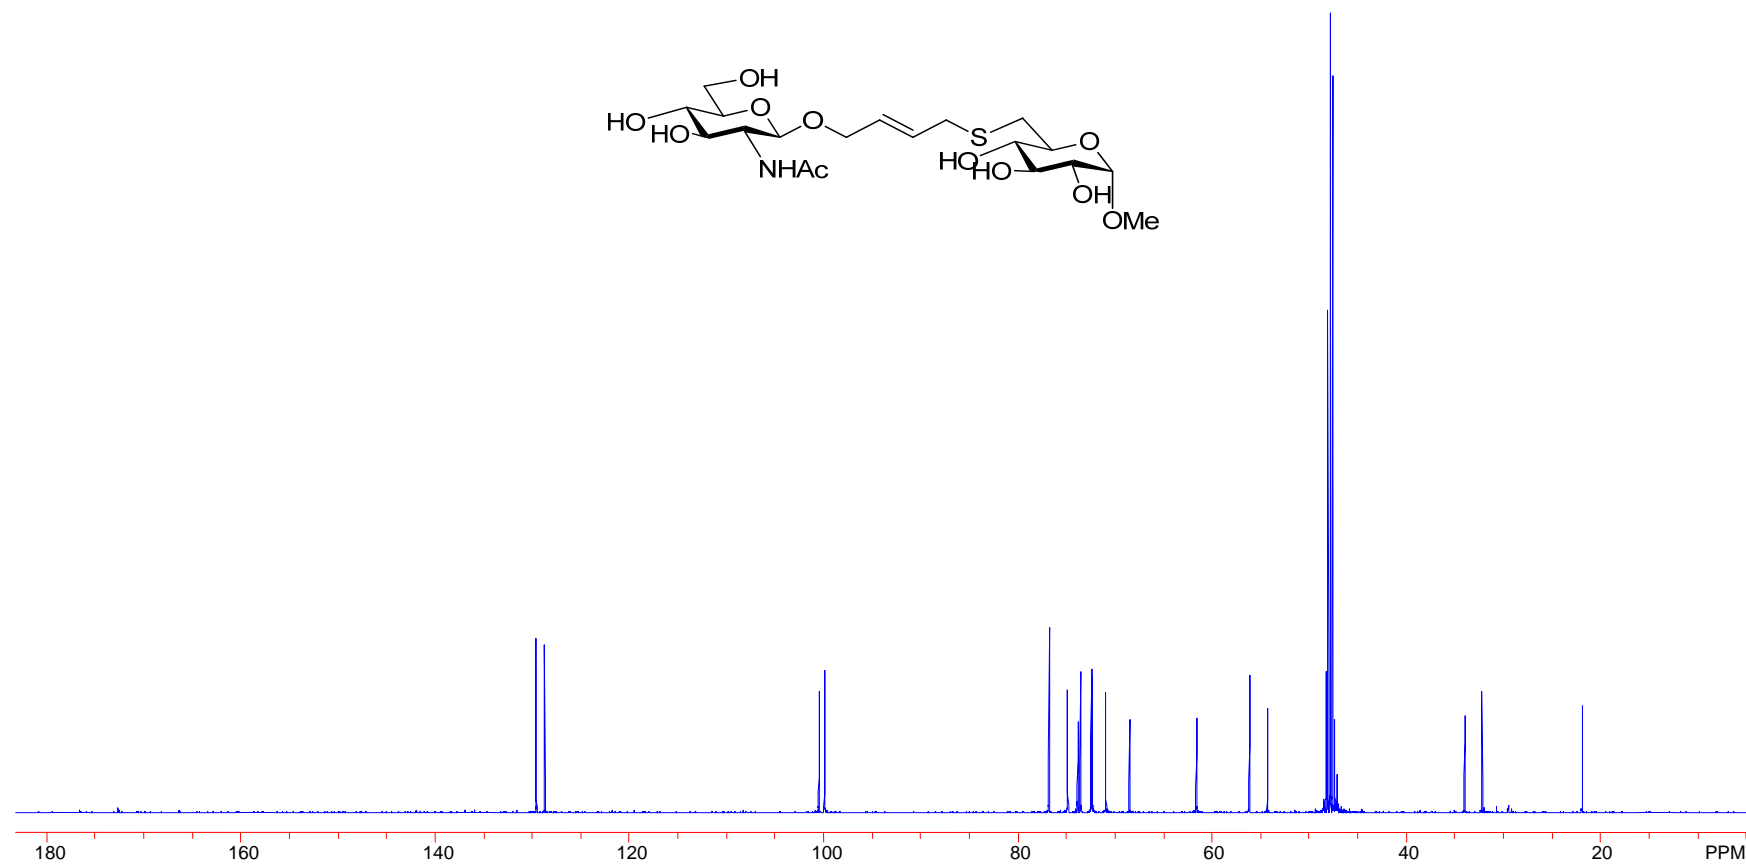

<sup>1</sup>H-NMR spectrum (CD<sub>3</sub>OD, 400 MHz) Methyl 6-[4-(2-acetamido-2-deoxy-β-D-glucopyranosyloxy)-2*E*-butenyl]-thio-2-acetamido-2-deoxy-β-D-glucopyranoside (**42**).

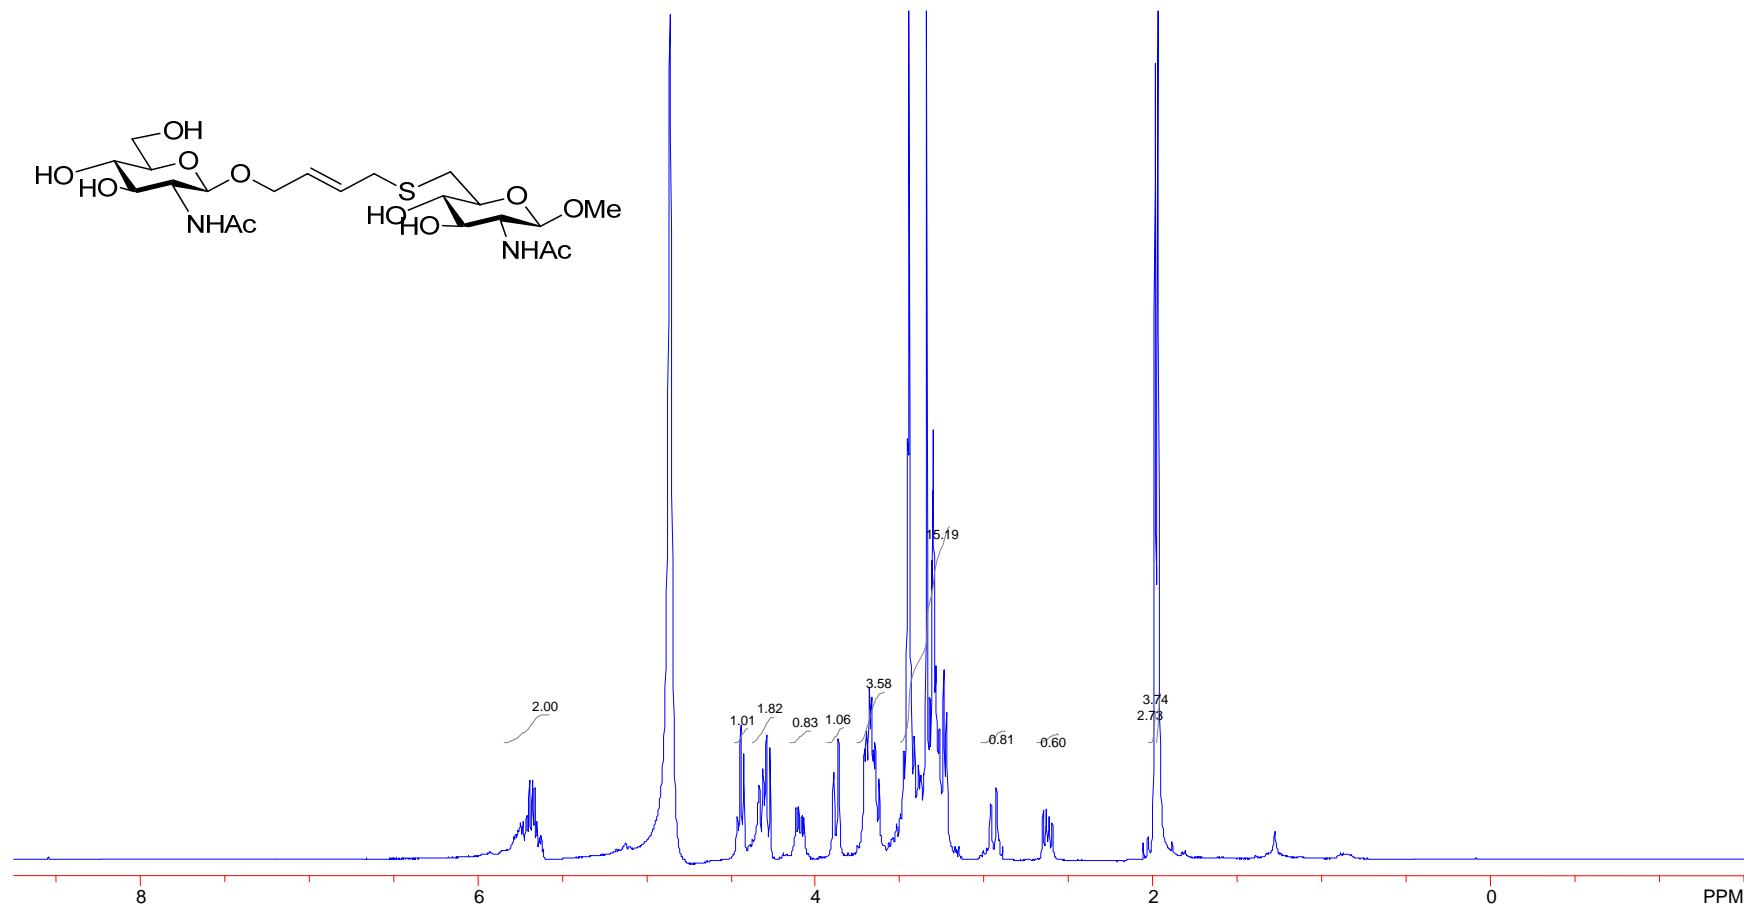

S-60

$^{13}\text{C}$ -NMR spectrum ( $\text{CD}_3\text{OD}$ , 100 MHz) Methyl 6-[4-(2-acetamido-2-deoxy- $\beta$ -D-glucopyranosyloxy)-2*E*-butenyl]-thio-2-acetamido-2-deoxy- $\beta$ -D-glucopyranoside (**42**).

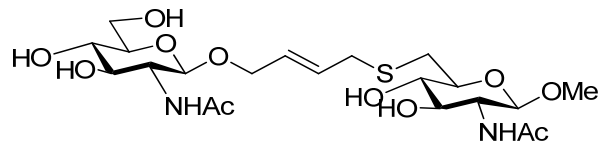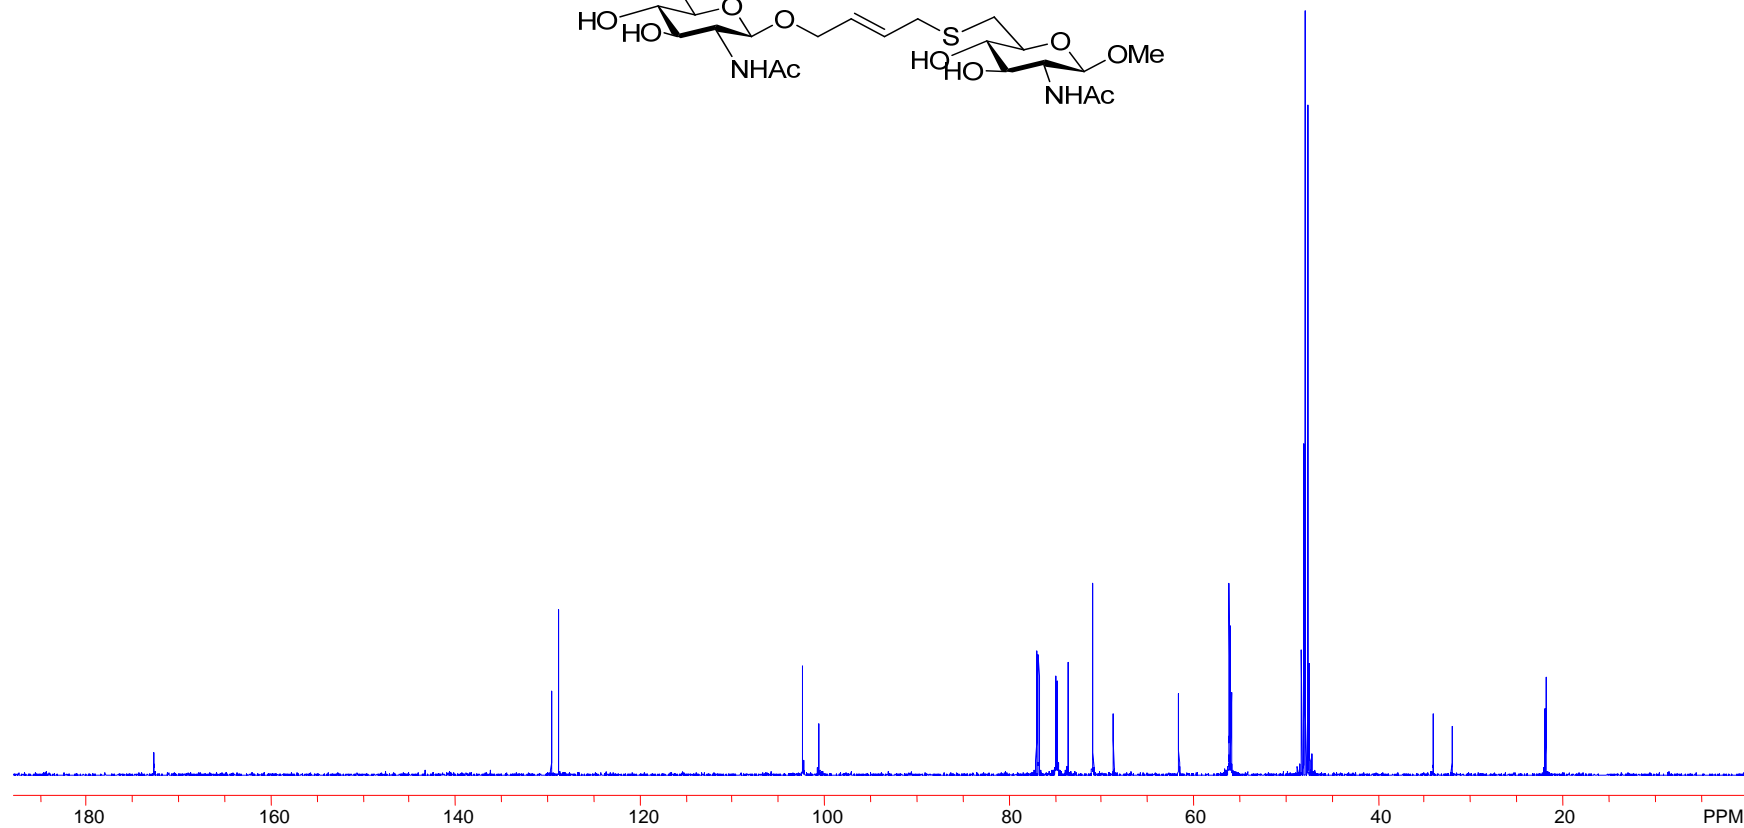

<sup>1</sup>H-NMR spectrum (CD<sub>3</sub>OD, 500 MHz) Methyl 3-deoxy-3-[4-(β-D-glucopyranosyloxy)but-2*E*-enylthio]-β-D-glucopyranoside (**43**).

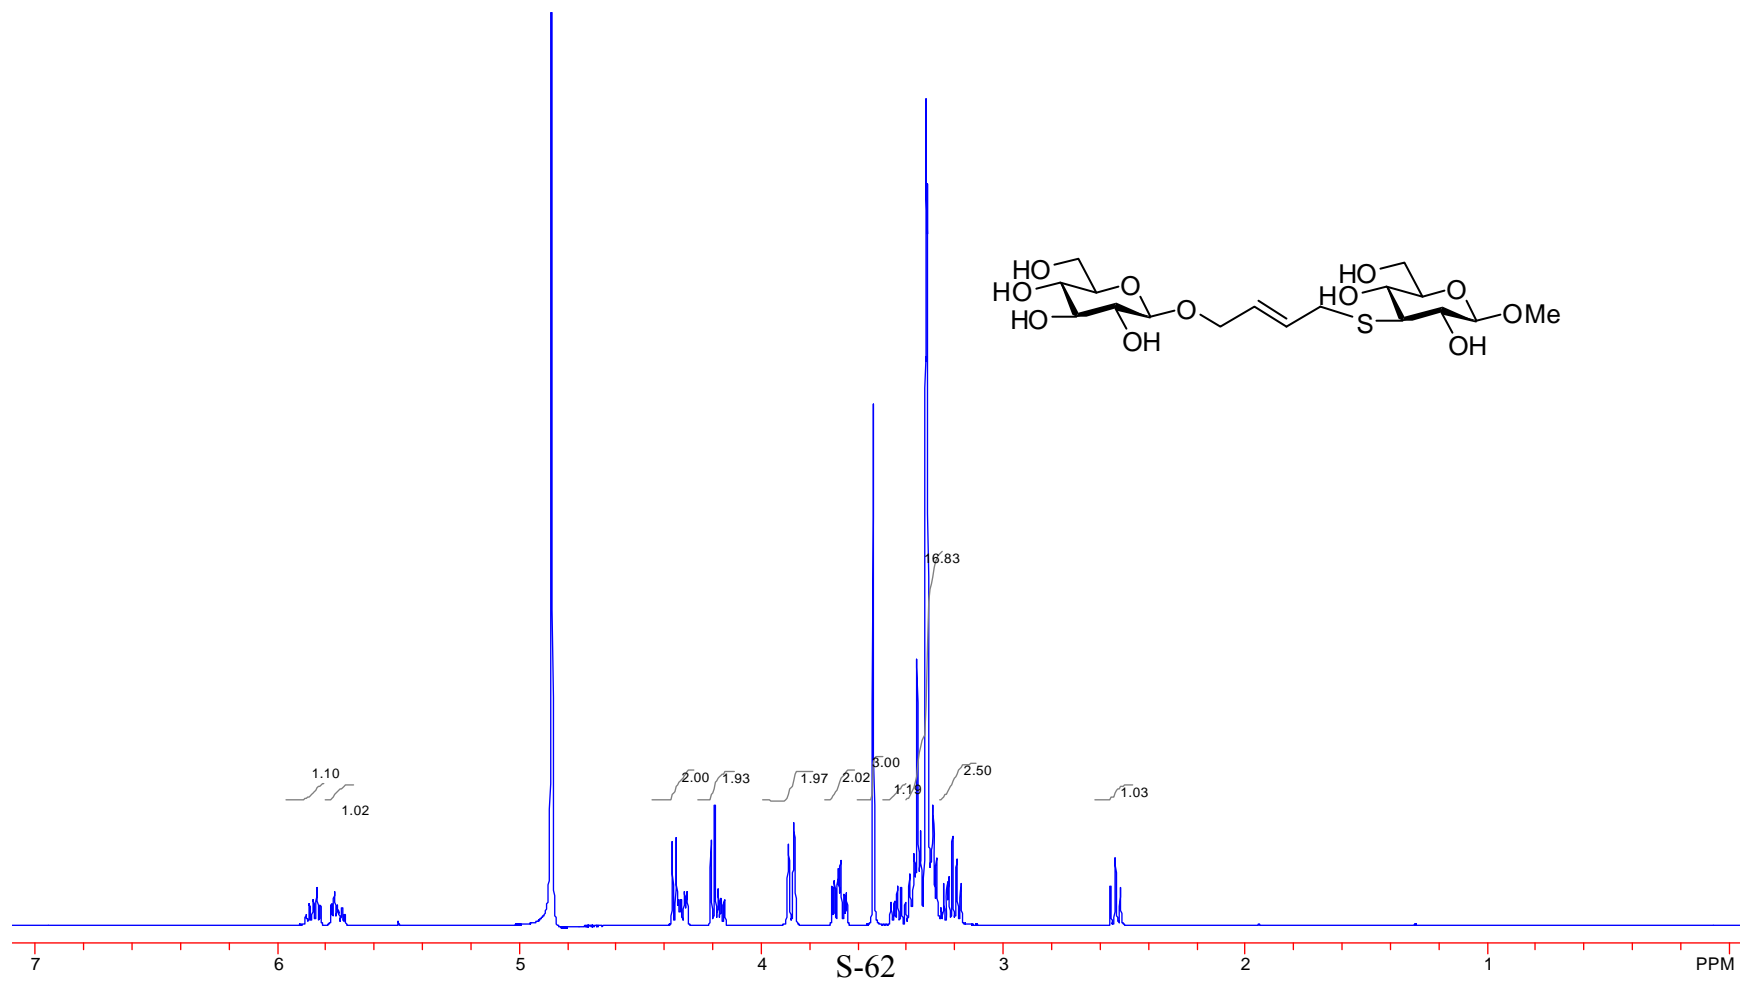

$^{13}\text{C}$ -NMR spectrum ( $\text{CD}_3\text{OD}$ , 125 MHz) Methyl 3-deoxy-3-[4-( $\beta$ -D-glucopyranosyloxy)but-2*E*-enylthio]- $\beta$ -D-glucopyranoside (**43**).

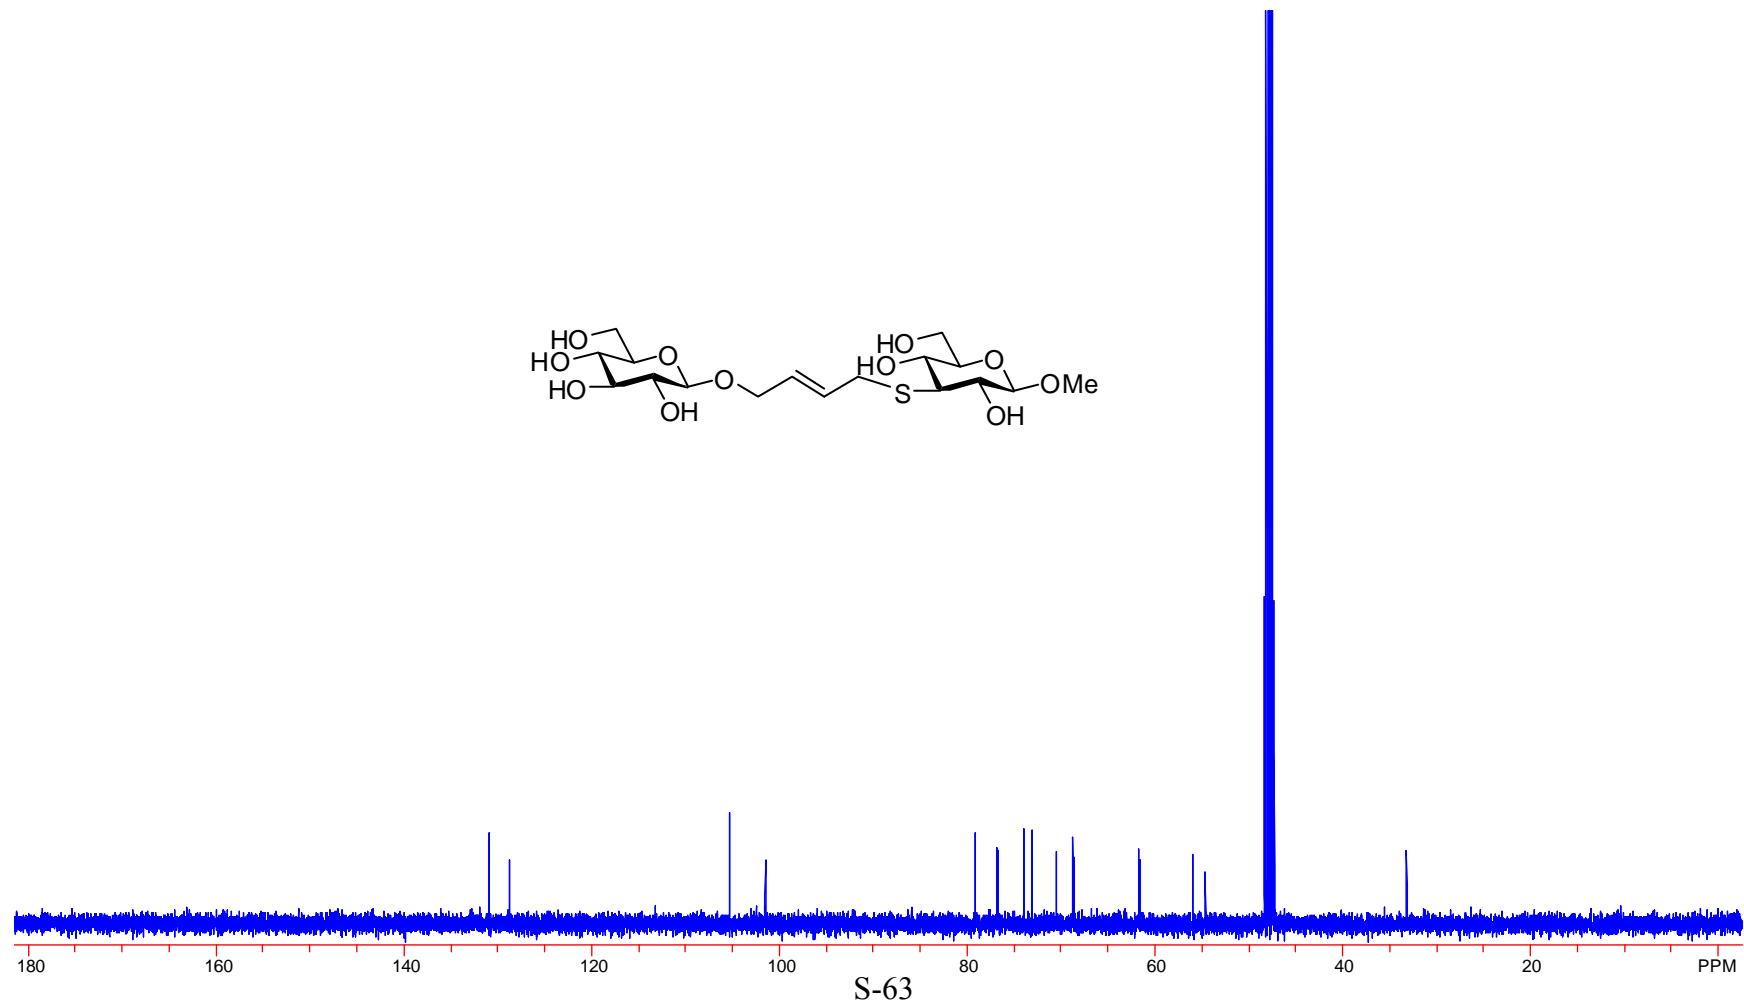

$^1\text{H-NMR}$  spectrum ( $\text{CD}_3\text{OD}$ , 500 MHz) Methyl 3-*O*-[4-(1-thio- $\beta$ -D-glucopyranosyl)-2*E*-butenyl]- $\beta$ -D-glucopyranoside (**44**).

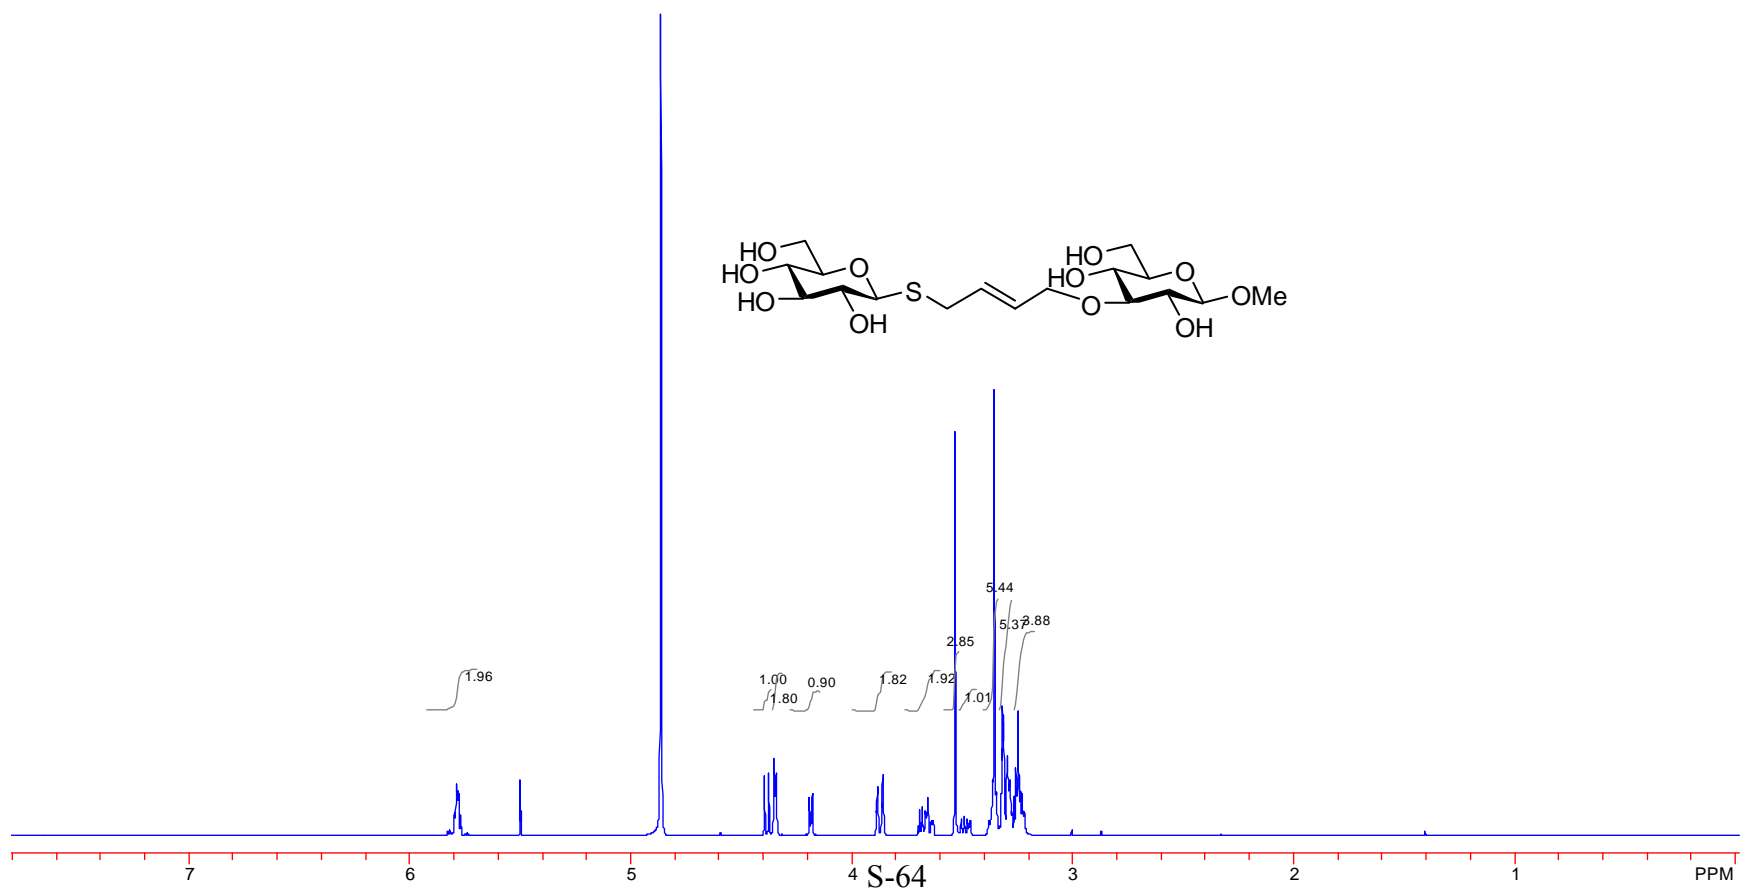



$^{13}\text{C}$ -NMR spectrum ( $\text{CD}_3\text{OD}$ , 125 MHz) Methyl 3-*O*-[4-(1-thio- $\beta$ -D-glucopyranosyl)-2*E*-butenyl]- $\beta$ -D-glucopyranoside (**44**).

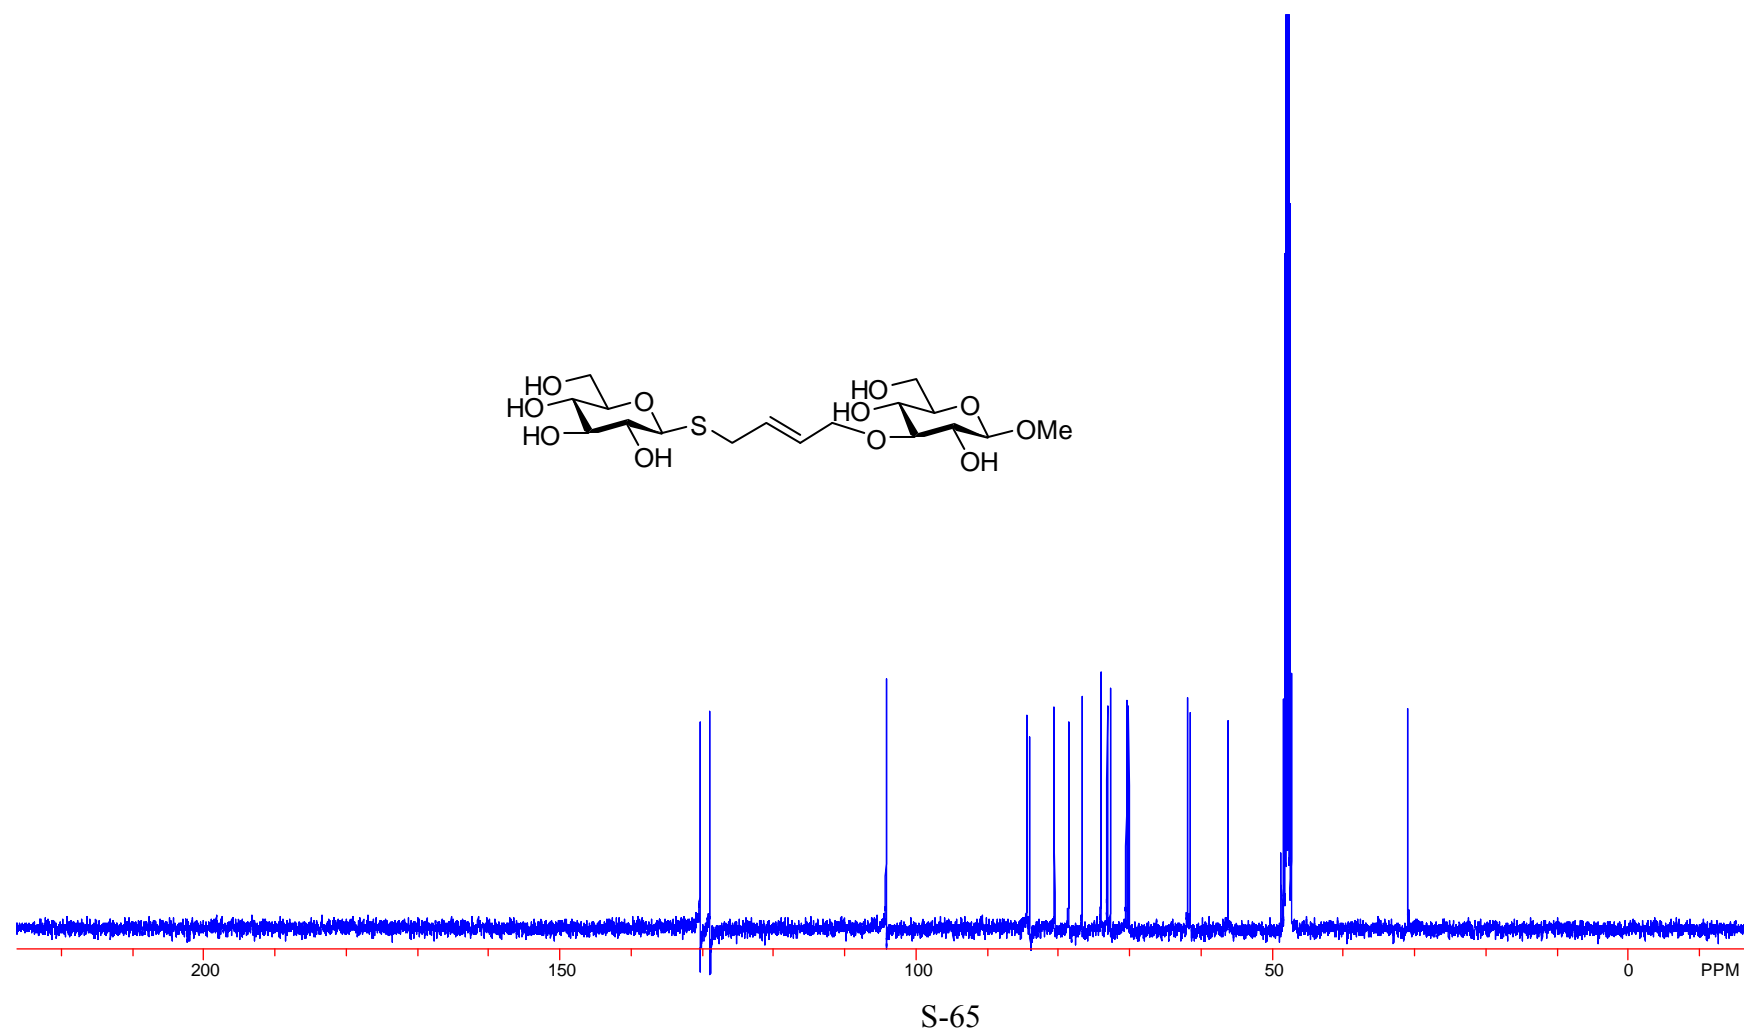

$^1\text{H-NMR}$  spectrum ( $\text{CD}_3\text{OD}$ , 500 MHz) Methyl 3-*O*-[4-(methyl  $\alpha$ -D-glucopyranosid-6-thio)but-2*E*-enyl]- $\beta$ -D-glucopyranoside (**45**).

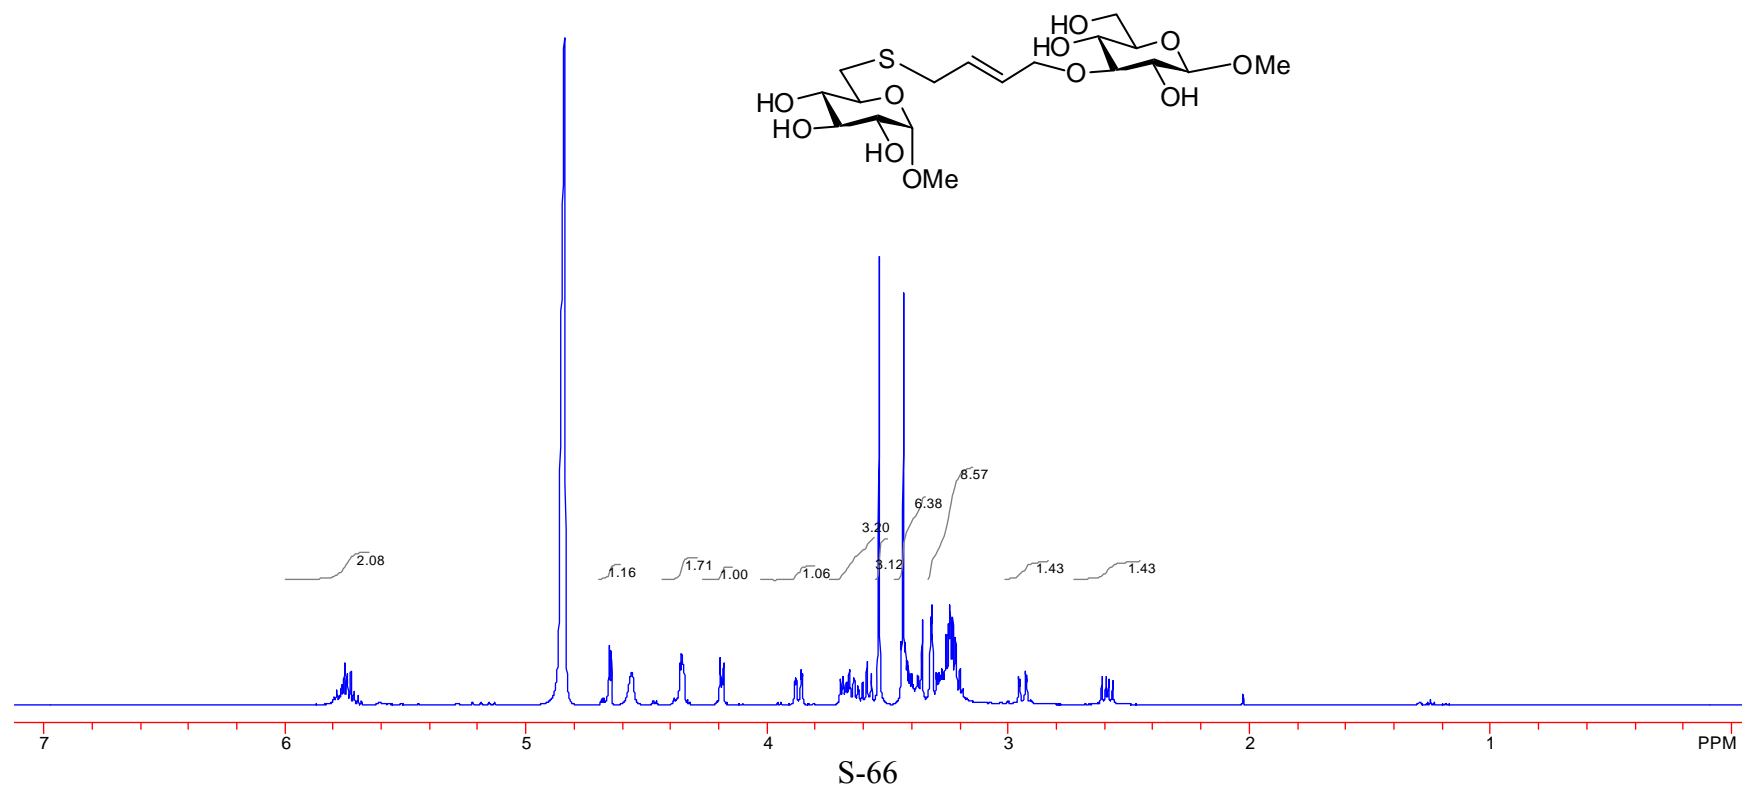

$^{13}\text{C}$ -NMR spectrum ( $\text{CD}_3\text{OD}$ , 125 MHz) Methyl 3-*O*-[4-(methyl  $\alpha$ -D-glucopyranosid-6-thio)but-2*E*-enyl]- $\beta$ -D-glucopyranoside (**45**).

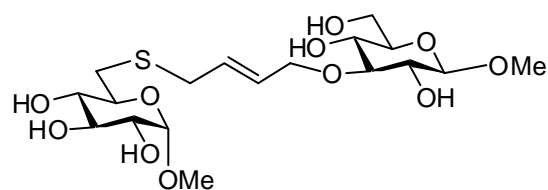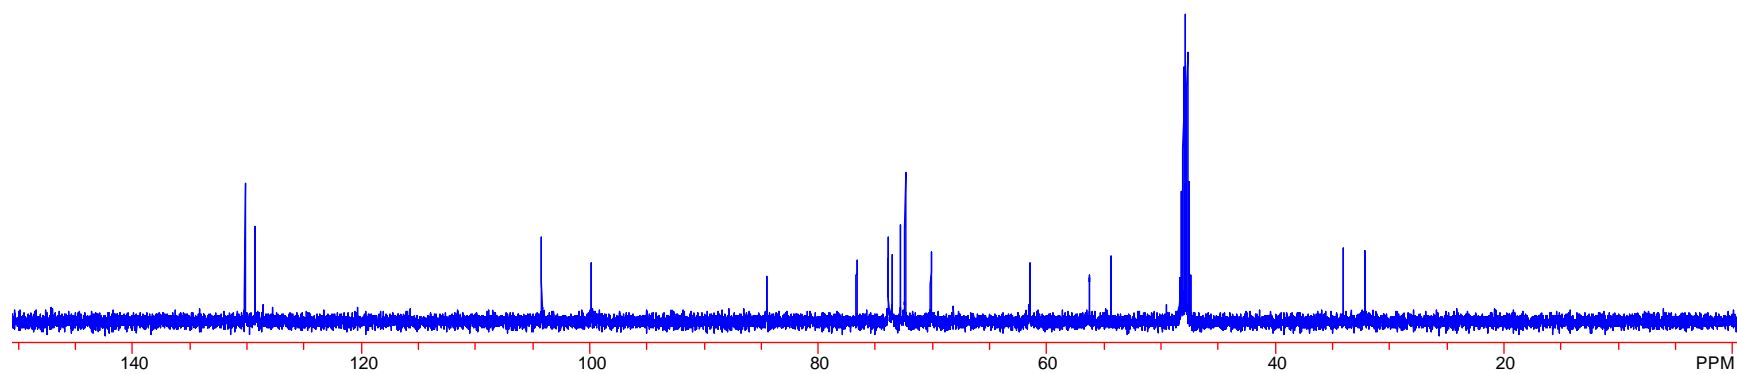

S-67

$^1\text{H-NMR}$  spectrum ( $\text{CD}_3\text{OD}$ , 500 MHz) Phenyl 3-deoxy-3-[4-( $\beta$ -D-glucopyranosyloxy)but-2*E*-enylthio]-1-thio- $\beta$ -D-glucopyranoside (**46**).

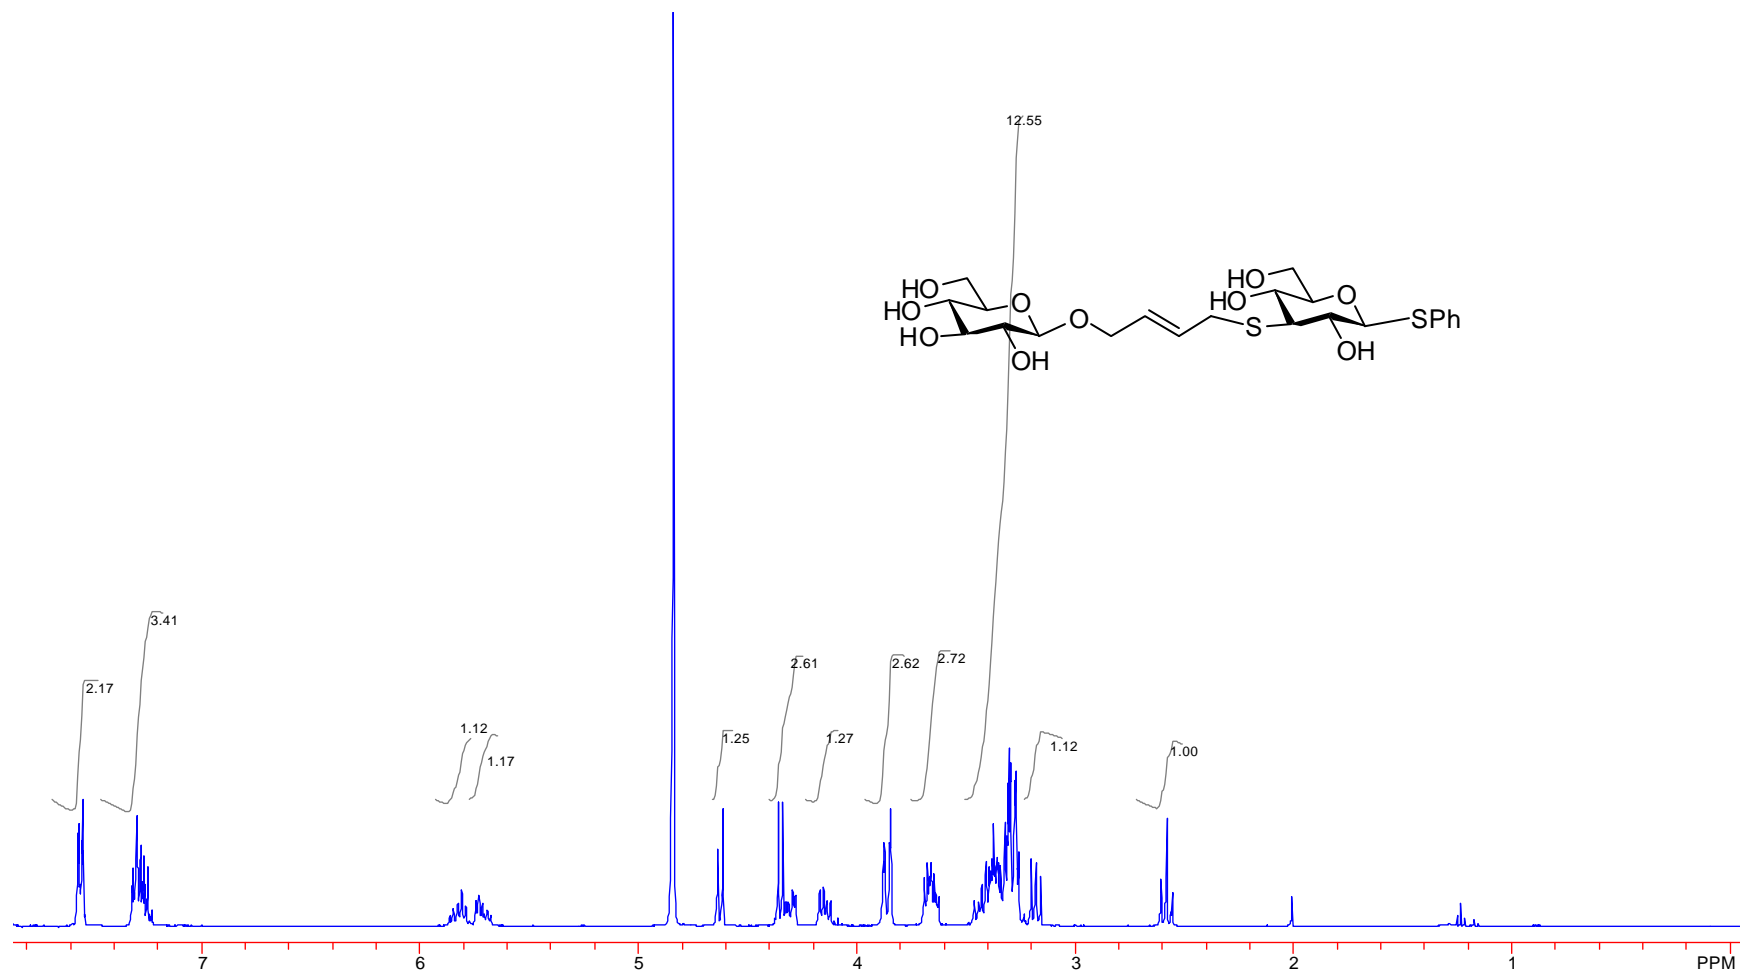

S-68

$^{13}\text{C}$ -NMR spectrum ( $\text{CD}_3\text{OD}$ , 125 MHz) Phenyl 3-deoxy-3-[4-( $\beta$ -D-glucopyranosyloxy)but-2*E*-enylthio]-1-thio- $\beta$ -D-glucopyranoside (**46**).

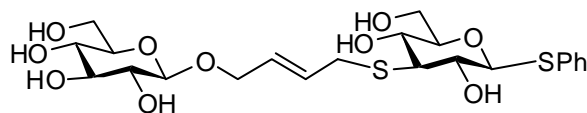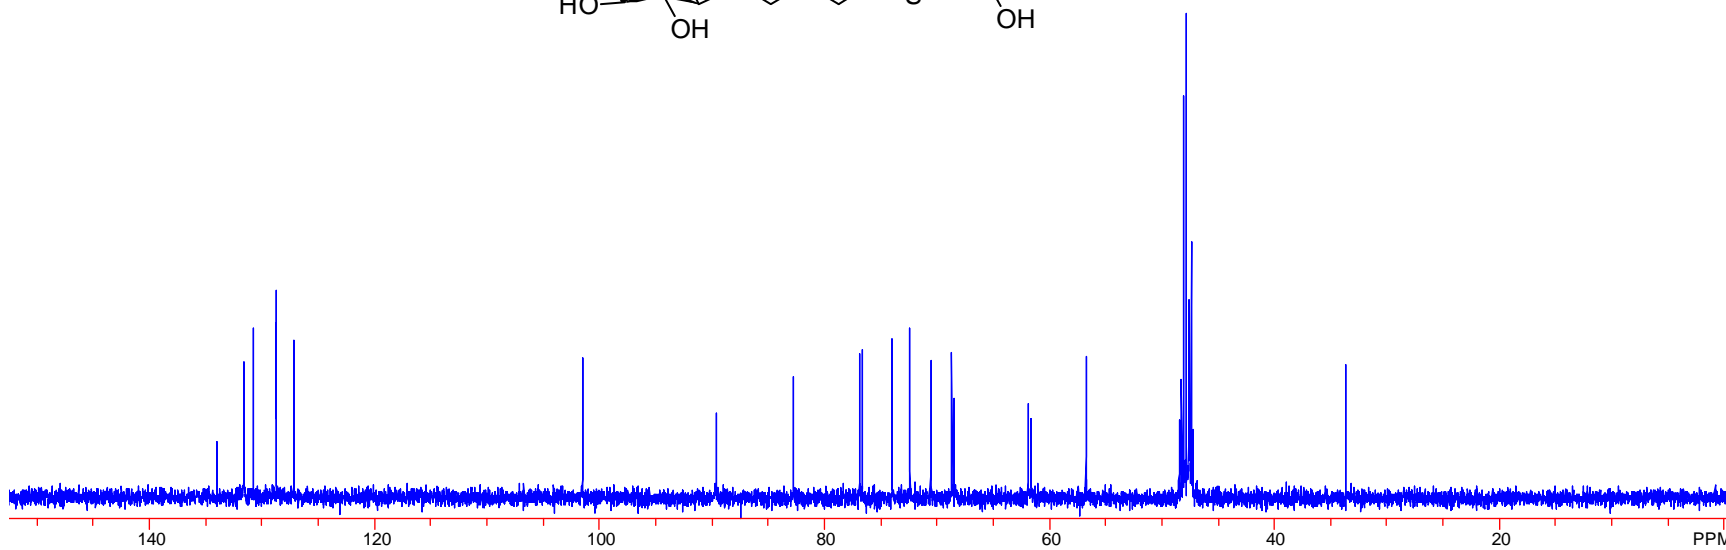

S-69

<sup>1</sup>H-NMR spectrum (CDCl<sub>3</sub>, 400 MHz) Phenyl 2-azido-2-deoxy-3,4-*O*-(2,3-dimethoxybutane-2,3-diyl)-1-thio-β-D-glucopyranoside (**48**).

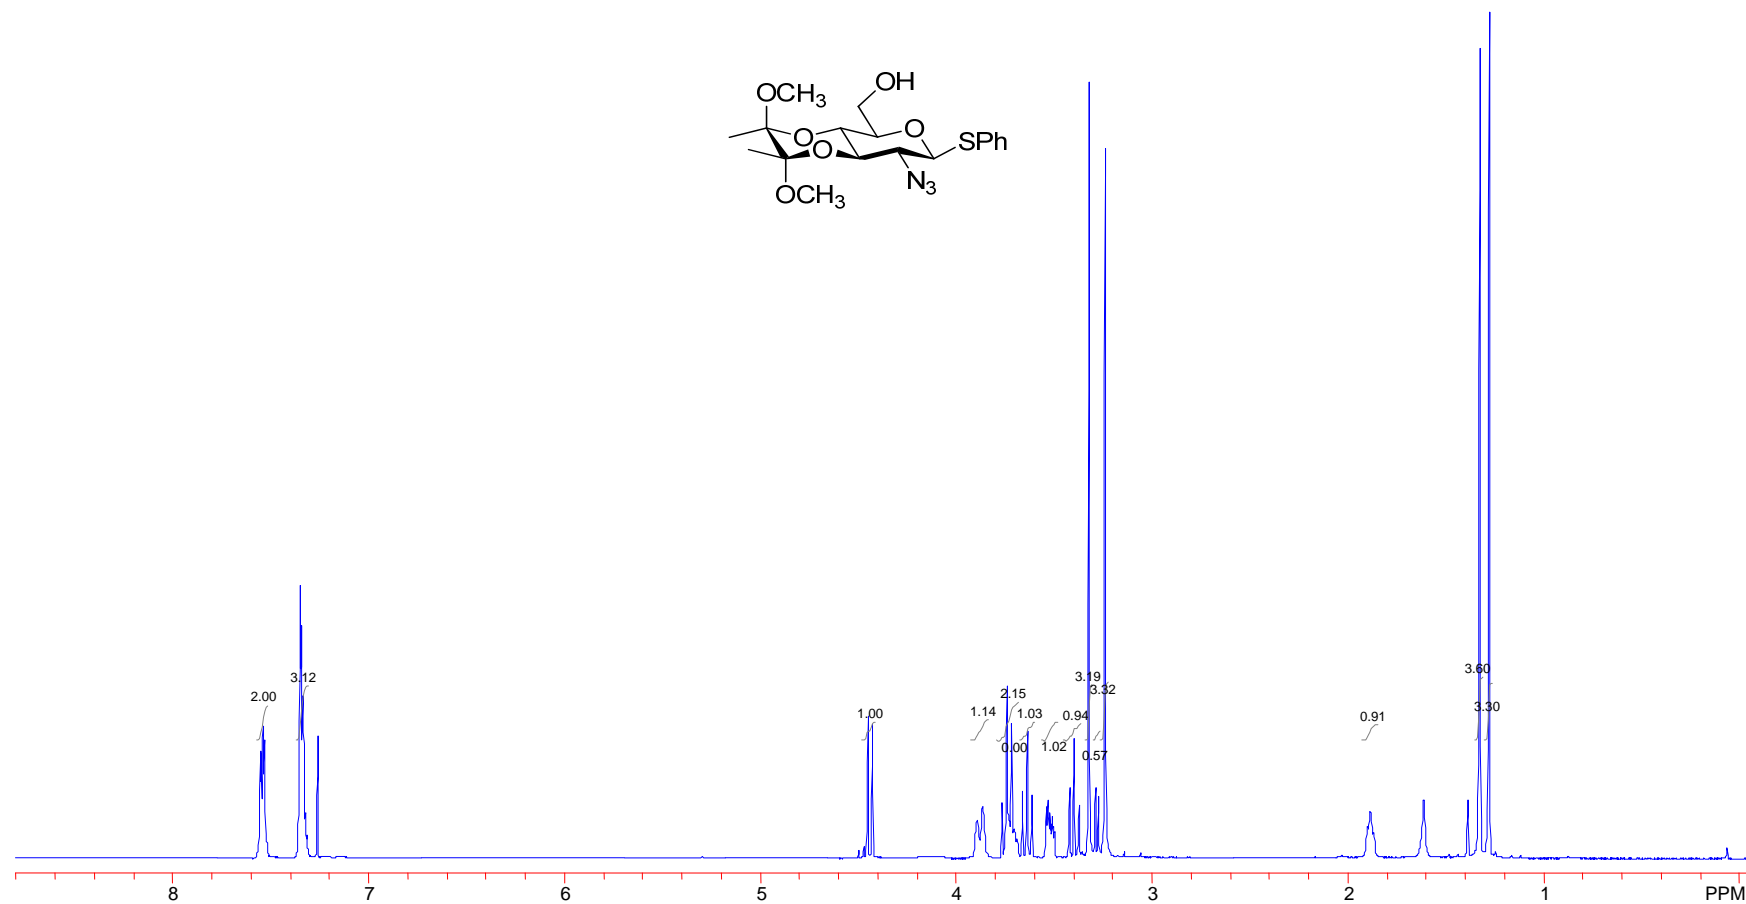

$^{13}\text{C}$ -NMR spectrum ( $\text{CDCl}_3$ , 100 MHz) Phenyl 2-azido-2-deoxy-3,4-*O*-(2,3-dimethoxybutane-2,3-diyl)-1-thio- $\beta$ -D-glucopyranoside (**48**).

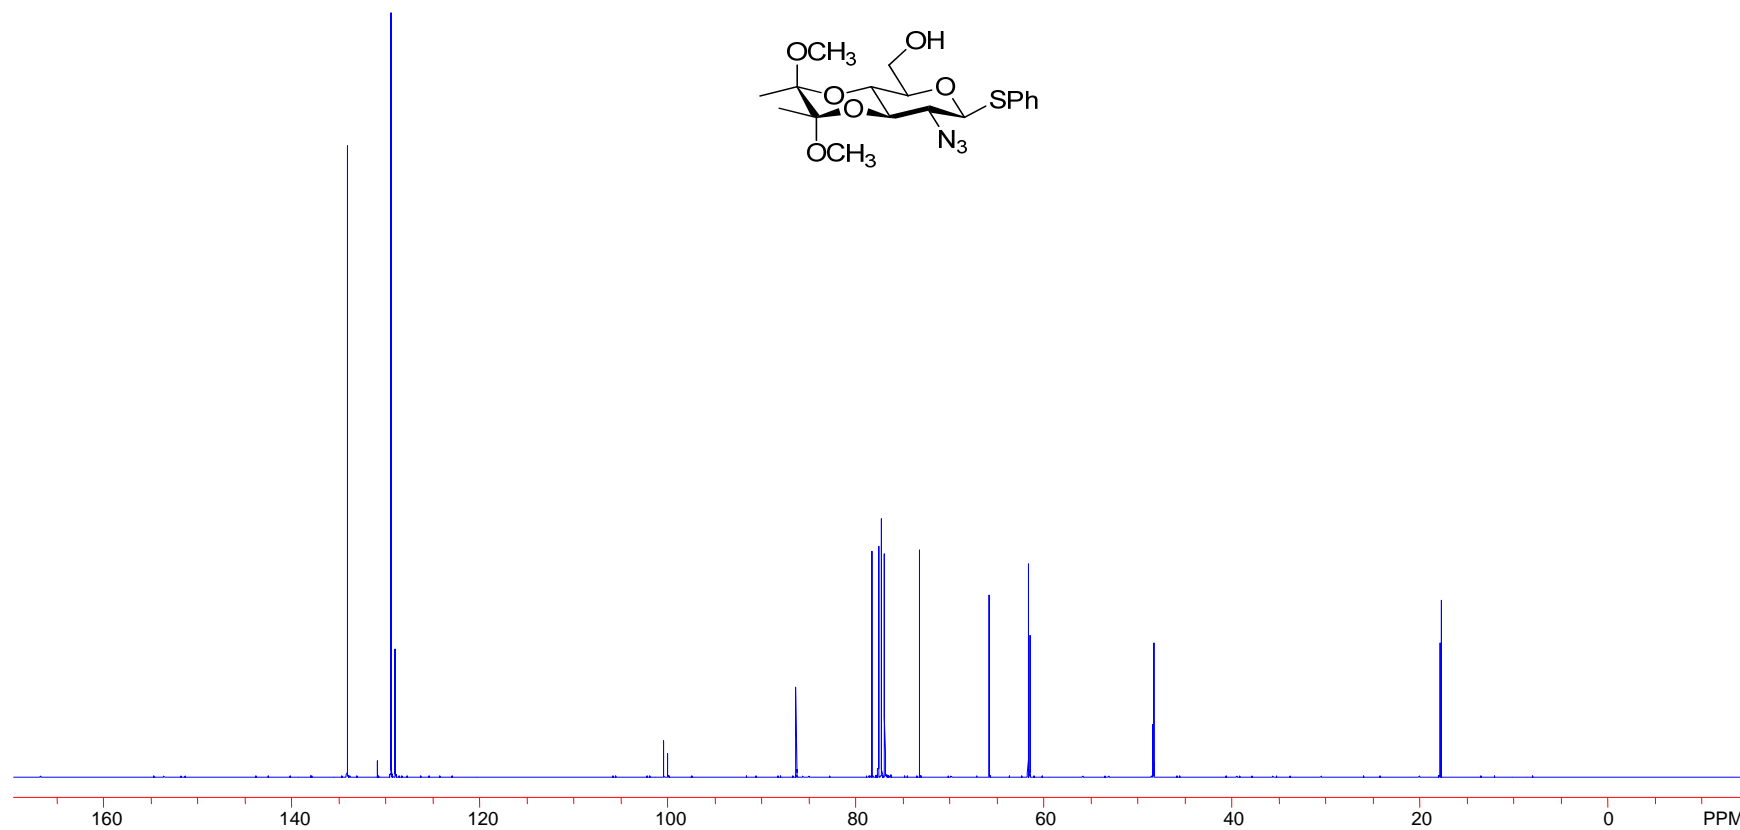

<sup>1</sup>H-NMR spectrum (CDCl<sub>3</sub>, 400 MHz) Methyl 2-azido-2-deoxy-3,4-*O*-(2,3-dimethoxybutane-2,3-diyl)-β-D-glucopyranoside (**55**).

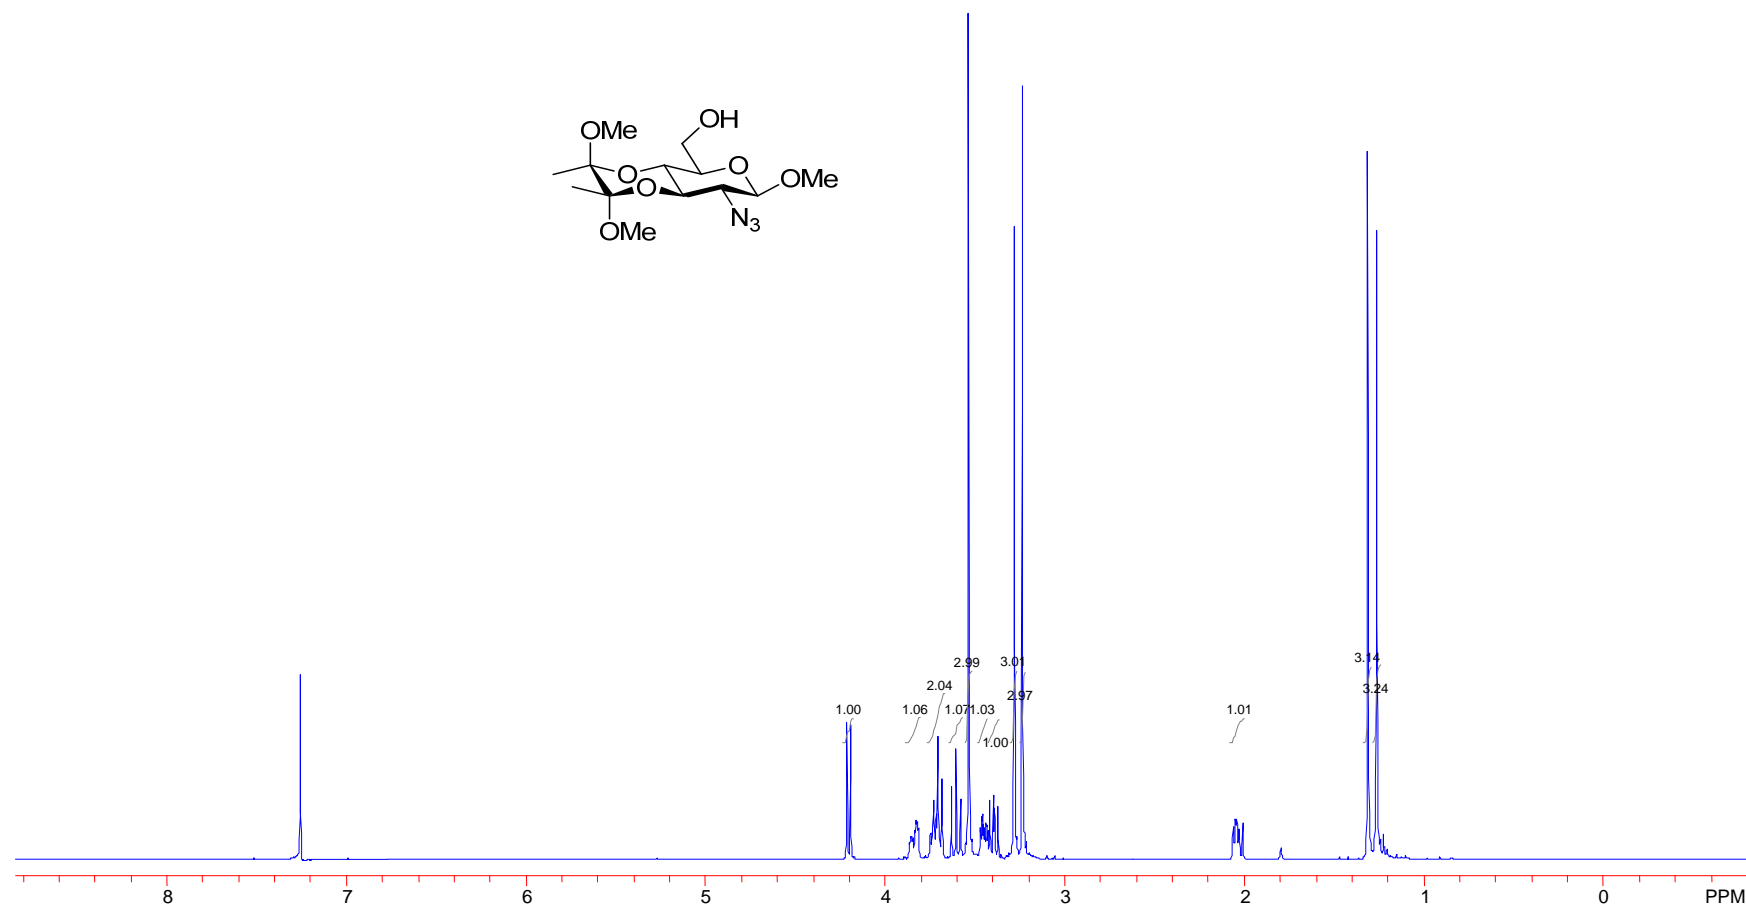



$^{13}\text{C}$ -NMR spectrum ( $\text{CDCl}_3$ , 100 MHz) Methyl 2-azido-2-deoxy-3,4-*O*-(2,3-dimethoxybutane-2,3-diyl)- $\beta$ -D-glucopyranoside (**55**).

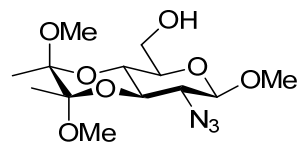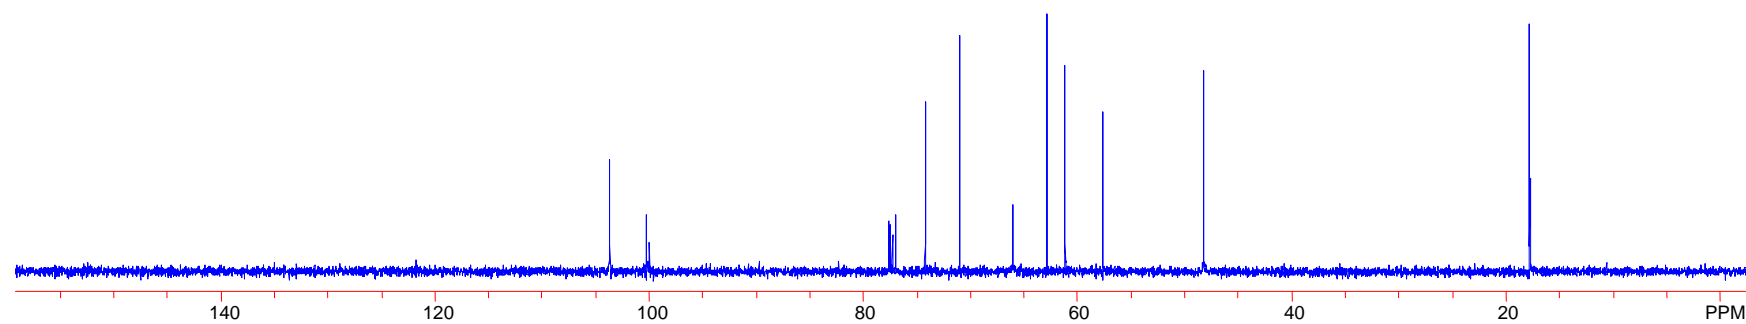

<sup>1</sup>H-NMR spectrum (CDCl<sub>3</sub>, 400 MHz) Phenyl 2-azido-2-deoxy-3,4-O-(2,3-dimethoxybutane-2,3-diyl)-1-thio-6-O-p-toluenesulfonyl-β-D-glucopyranoside (**73**).

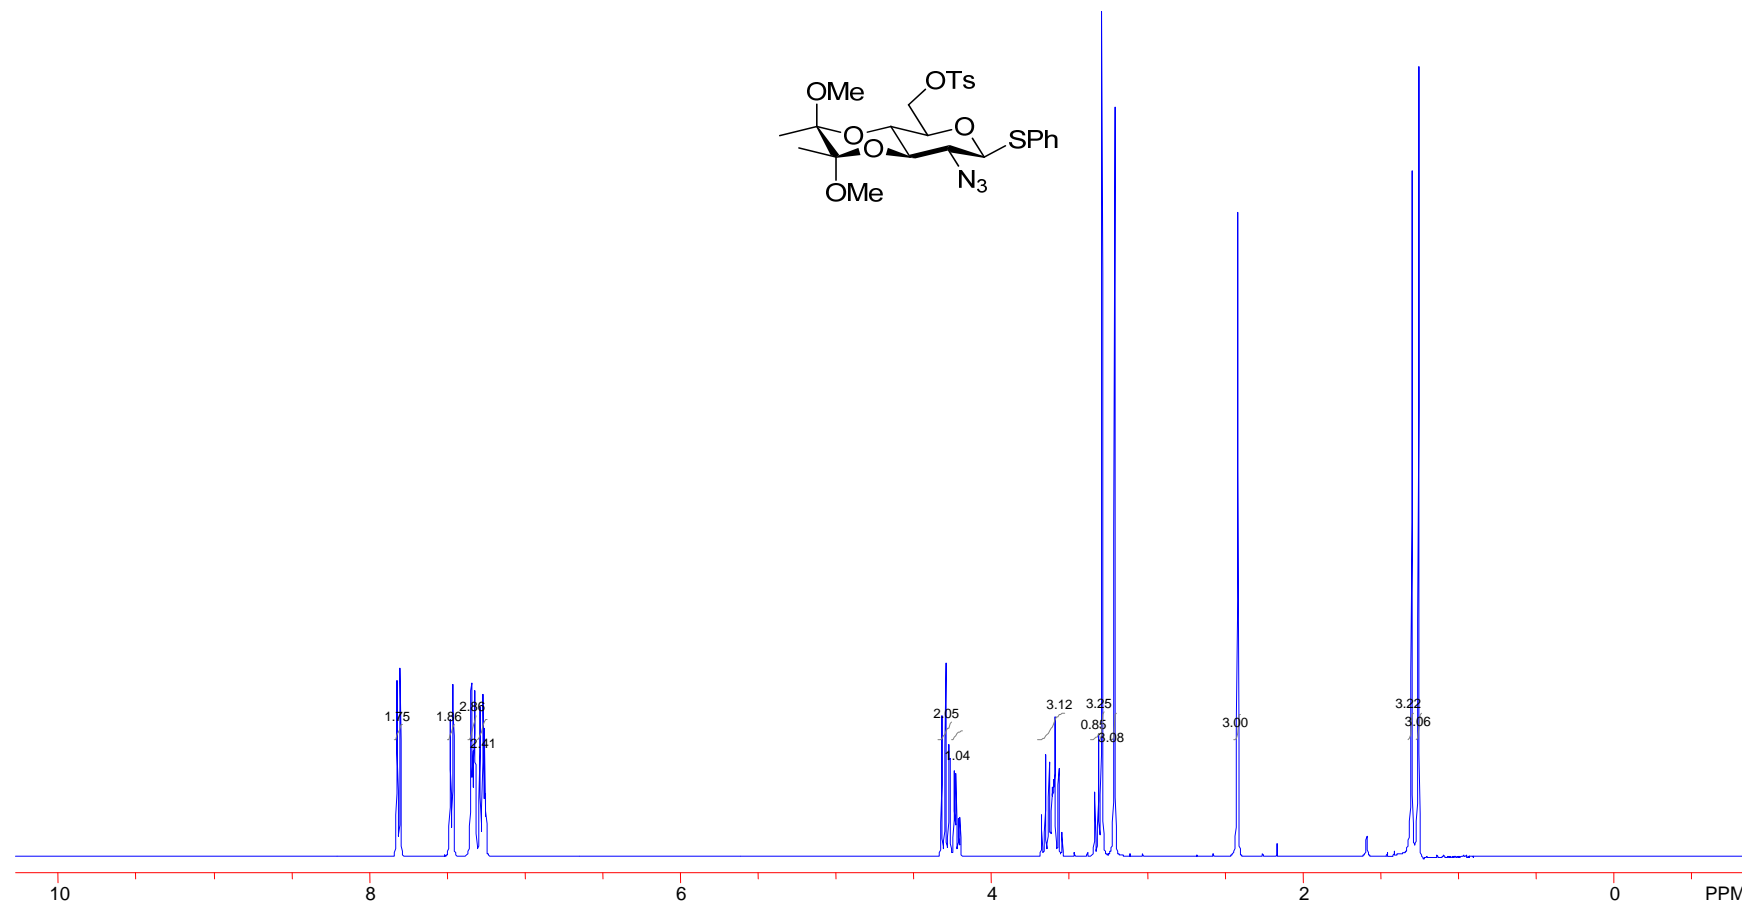

$^{13}\text{C}$ -NMR spectrum ( $\text{CDCl}_3$ , 100 MHz) Phenyl 2-azido-2-deoxy-3,4-O-(2,3-dimethoxybutane-2,3-diyl)-1-thio-6-O-p-toluenesulfonyl- $\beta$ -D-glucopyranoside (**73**).

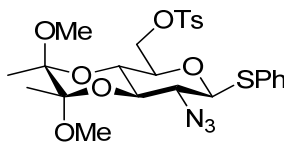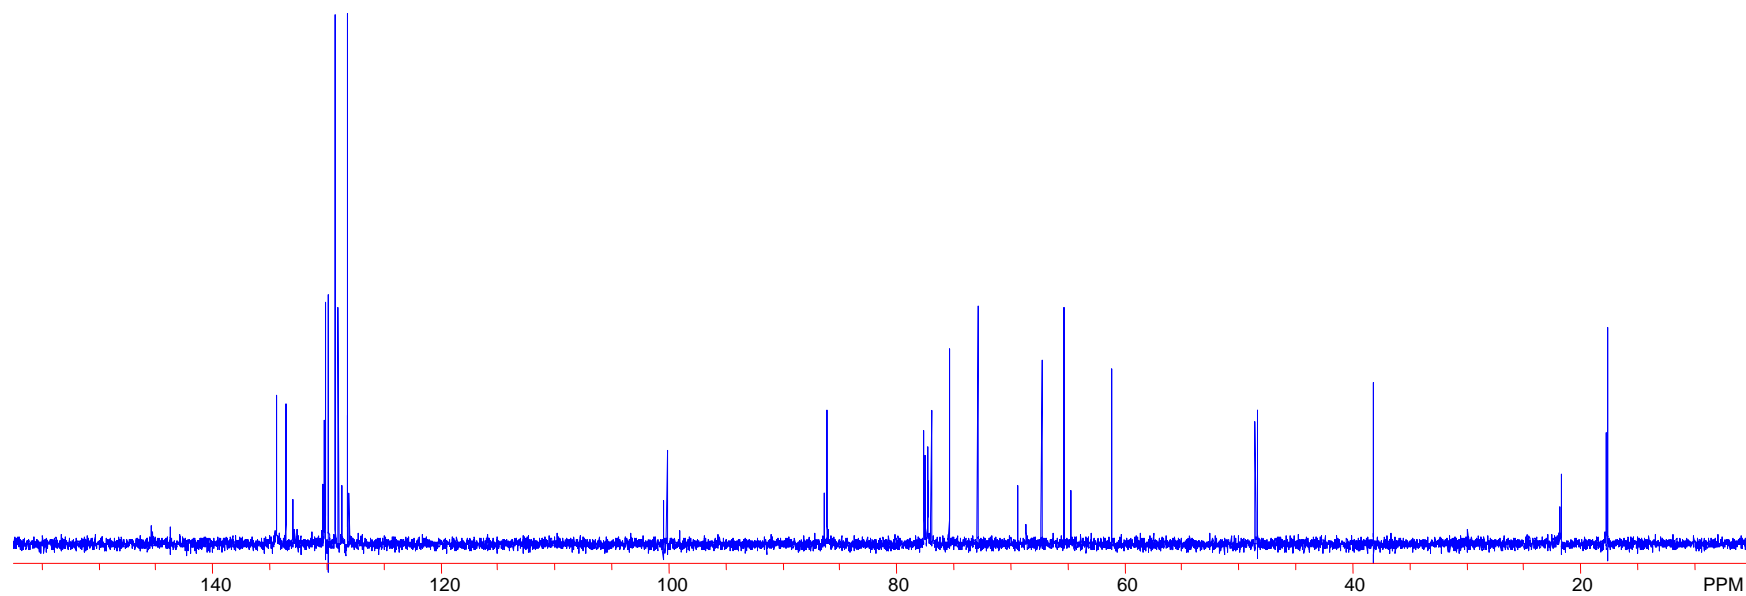

<sup>1</sup>H-NMR spectrum (CDCl<sub>3</sub>, 400 MHz) Phenyl 2-azido-2-deoxy-6-acetylthio-3,4-*O*-(2,3-dimethoxybutane-2,3-diyl)-1-thio-β-D-glucopyranoside (74).

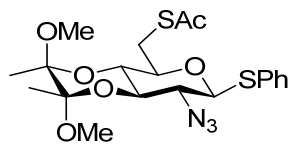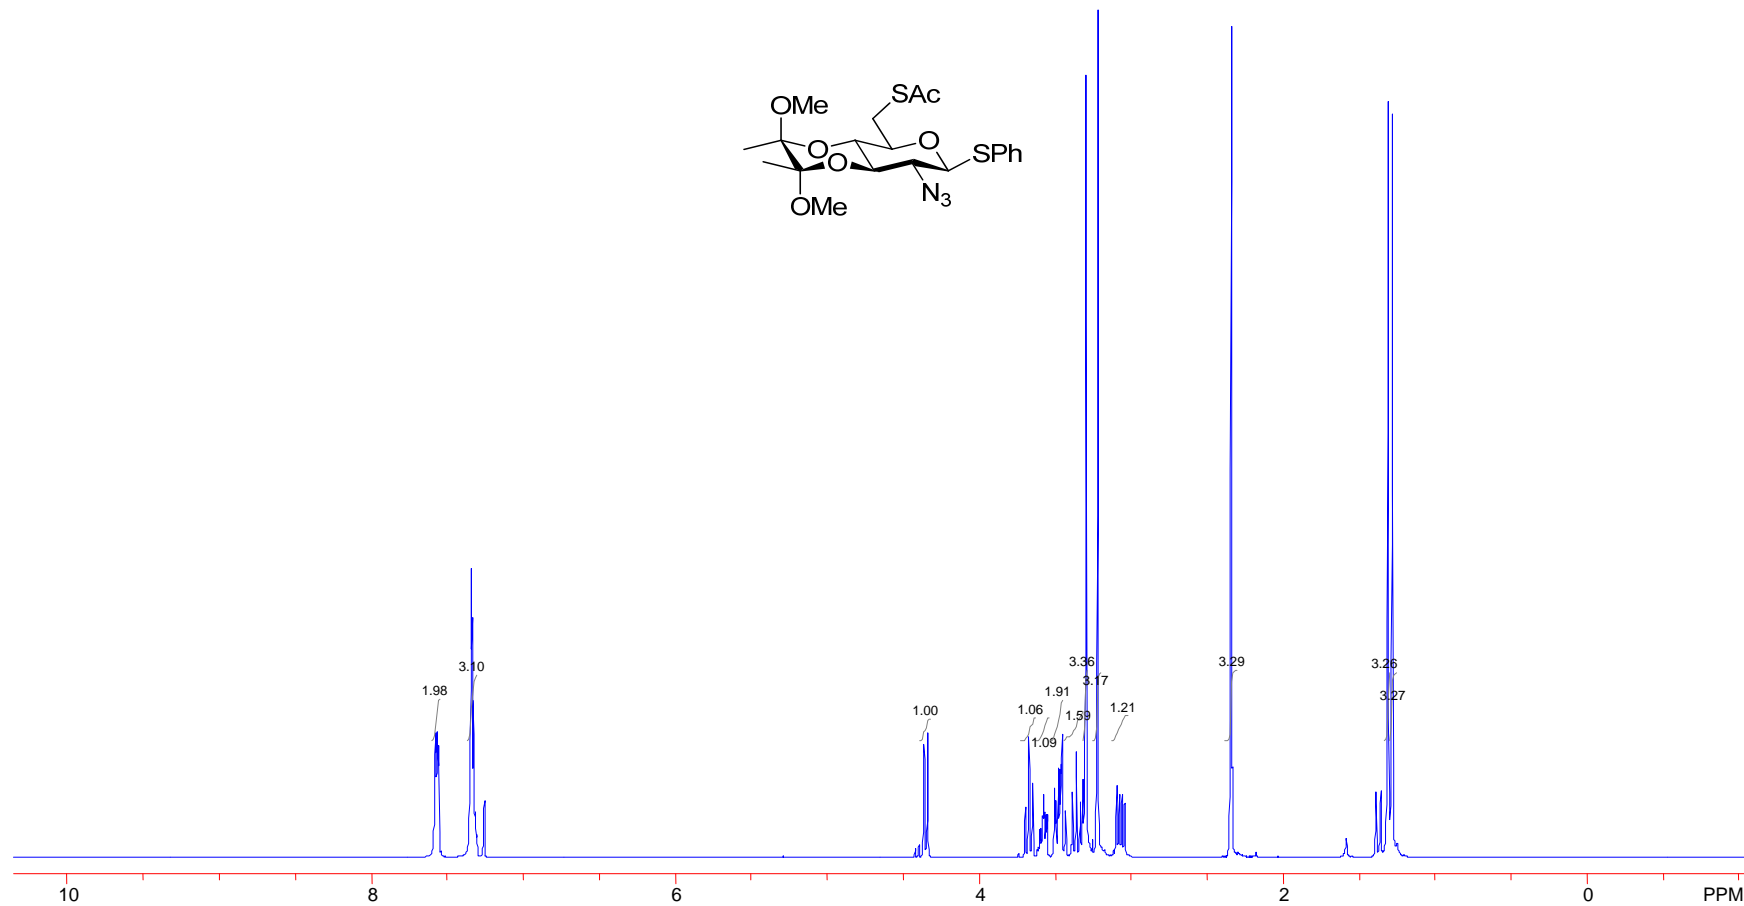

S-76

$^{13}\text{C}$ -NMR spectrum ( $\text{CDCl}_3$ , 100 MHz) Phenyl 2-azido-2-deoxy-6-acetylthio-3,4-*O*-(2,3-dimethoxybutane-2,3-diyl)-1-thio- $\beta$ -D-glucopyranoside (74).

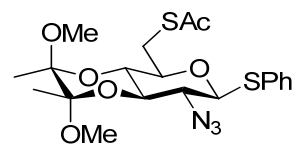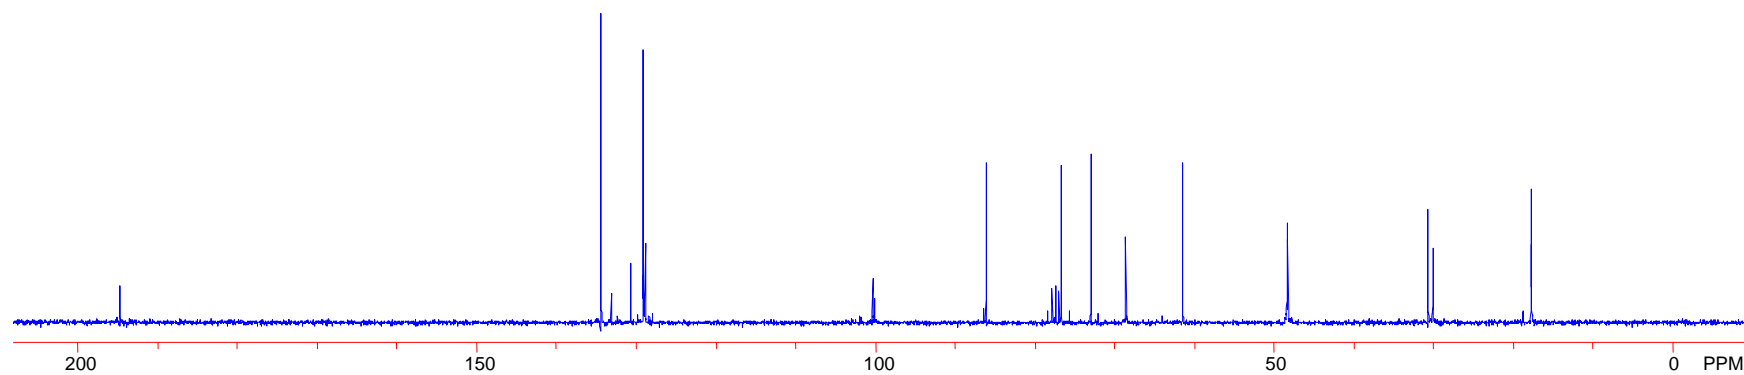

<sup>1</sup>H-NMR spectrum (CDCl<sub>3</sub>, 400 MHz) Phenyl 6-acetylthio-2-azido-2-deoxy-3,4-*O*-(2,3-dimethoxybutane-2,3-diyl)-1-thio-β-D-glucopyranoside *S*-Oxide (**54**).

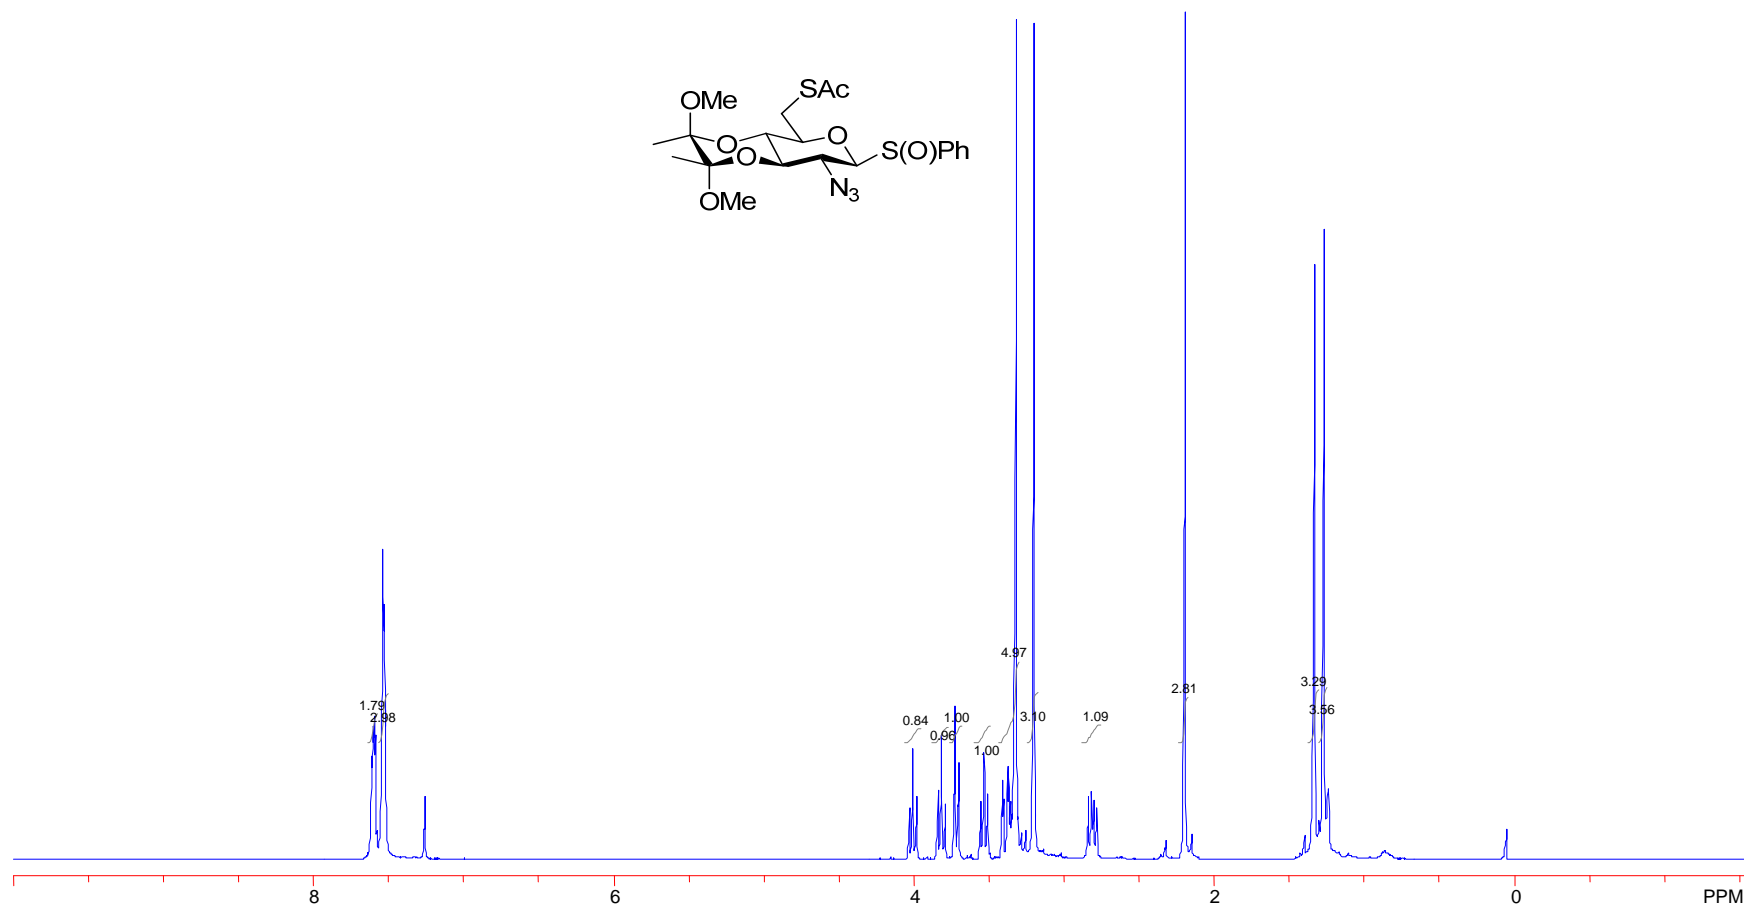

$^{13}\text{C}$ -NMR spectrum ( $\text{CDCl}_3$ , 100 MHz) Phenyl 6-acetylthio-2-azido-2-deoxy-3,4-*O*-(2,3-dimethoxybutane-2,3-diyl)-1-thio- $\beta$ -D-glucopyranoside *S*-Oxide (**54**).

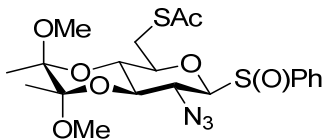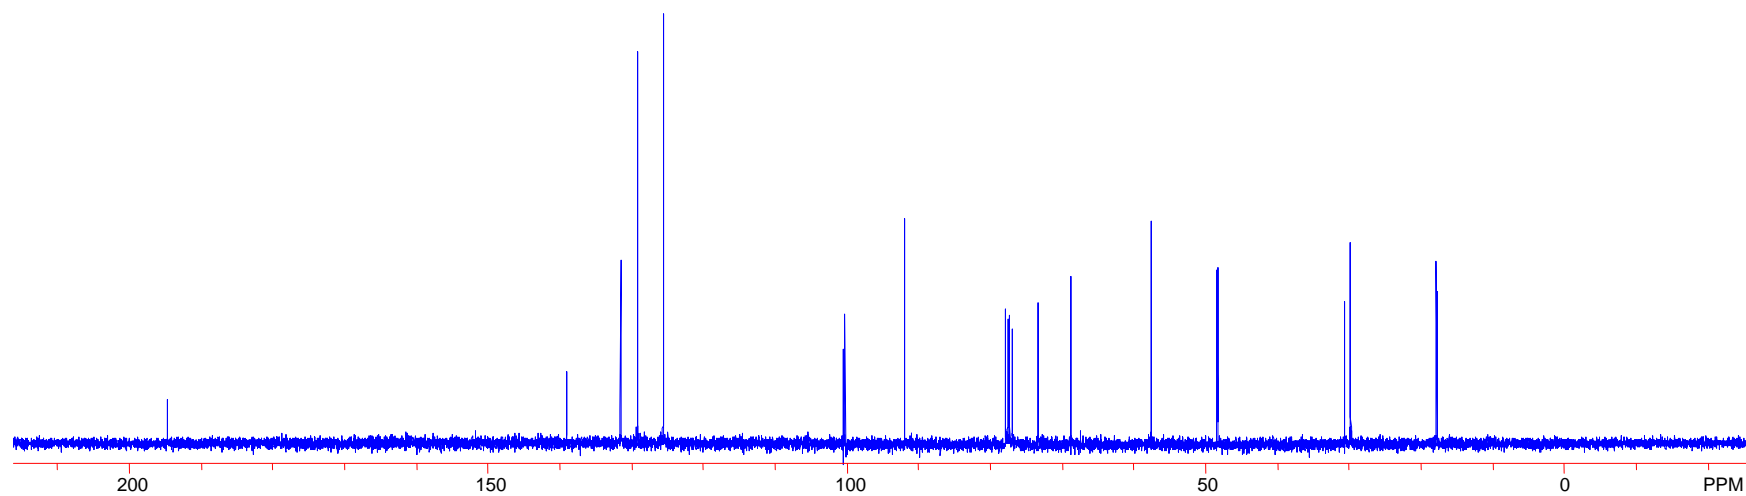

$^1\text{H-NMR}$  spectrum ( $\text{CDCl}_3$ , 400 MHz) Phenyl 2-azido-2-deoxy-3,4,6-tri-*O*-(*p*-methoxybenzyl)-1-thio- $\beta$ -D-glucopyranoside (**75**).

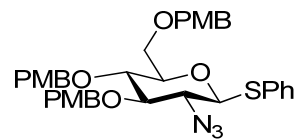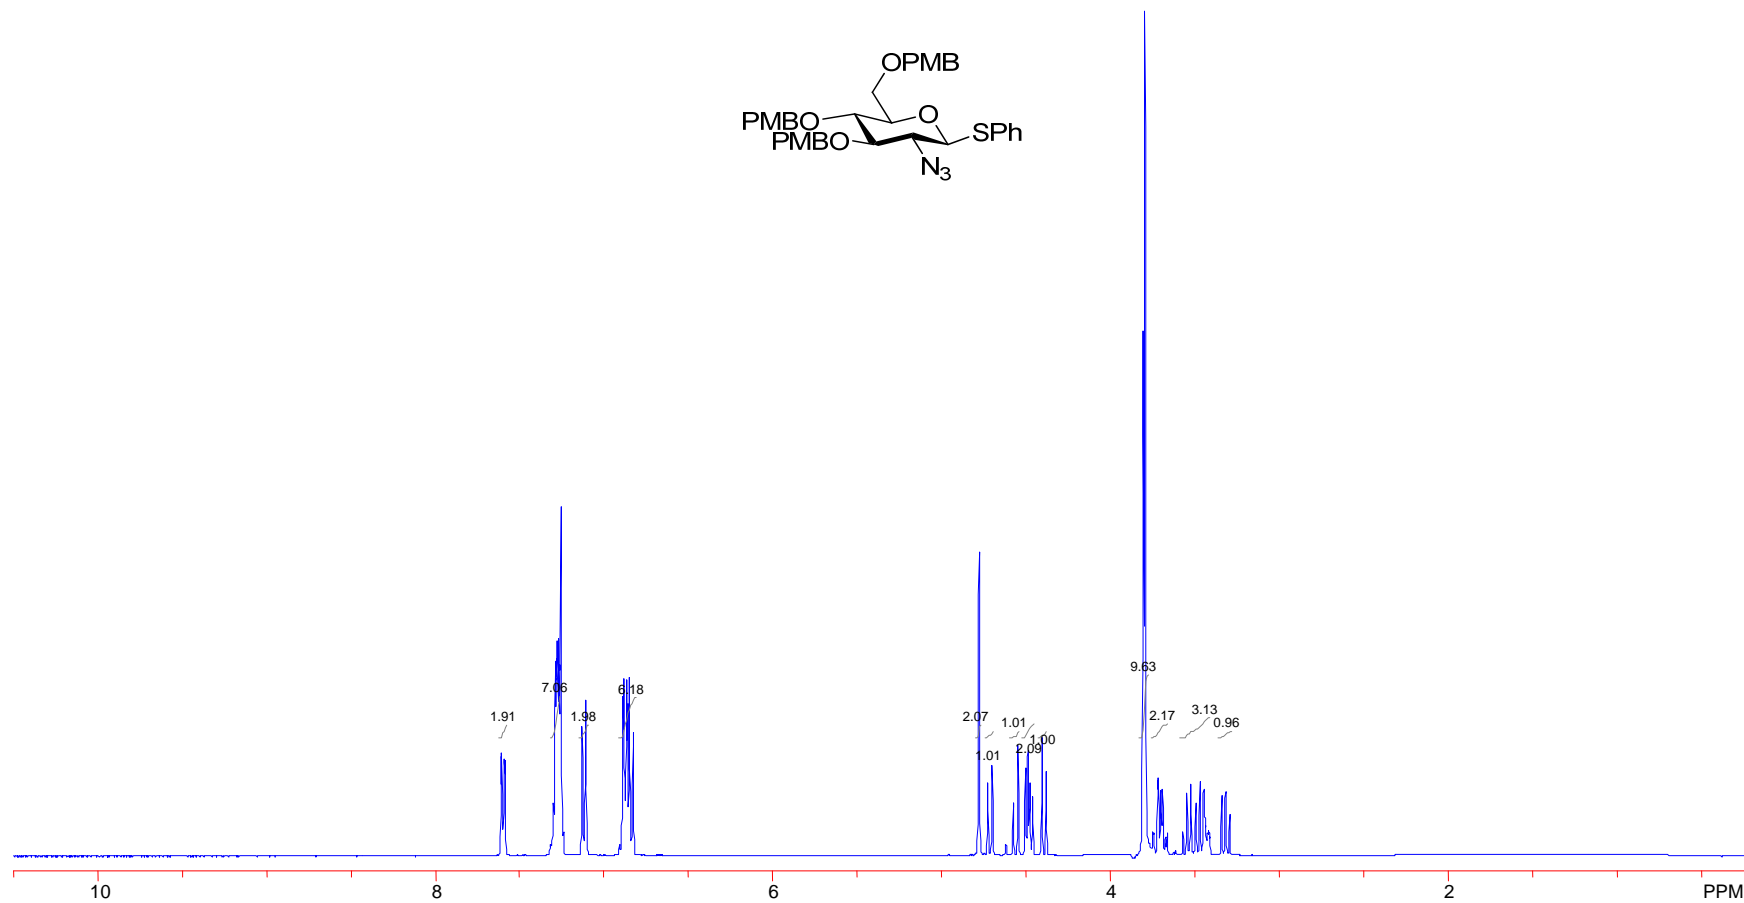



$^{13}\text{C}$ -NMR spectrum ( $\text{CDCl}_3$ , 100 MHz) Phenyl 2-azido-2-deoxy-3,4,6-tri-*O*-(*p*-methoxybenzyl)-1-thio- $\beta$ -D-glucopyranoside (**75**).

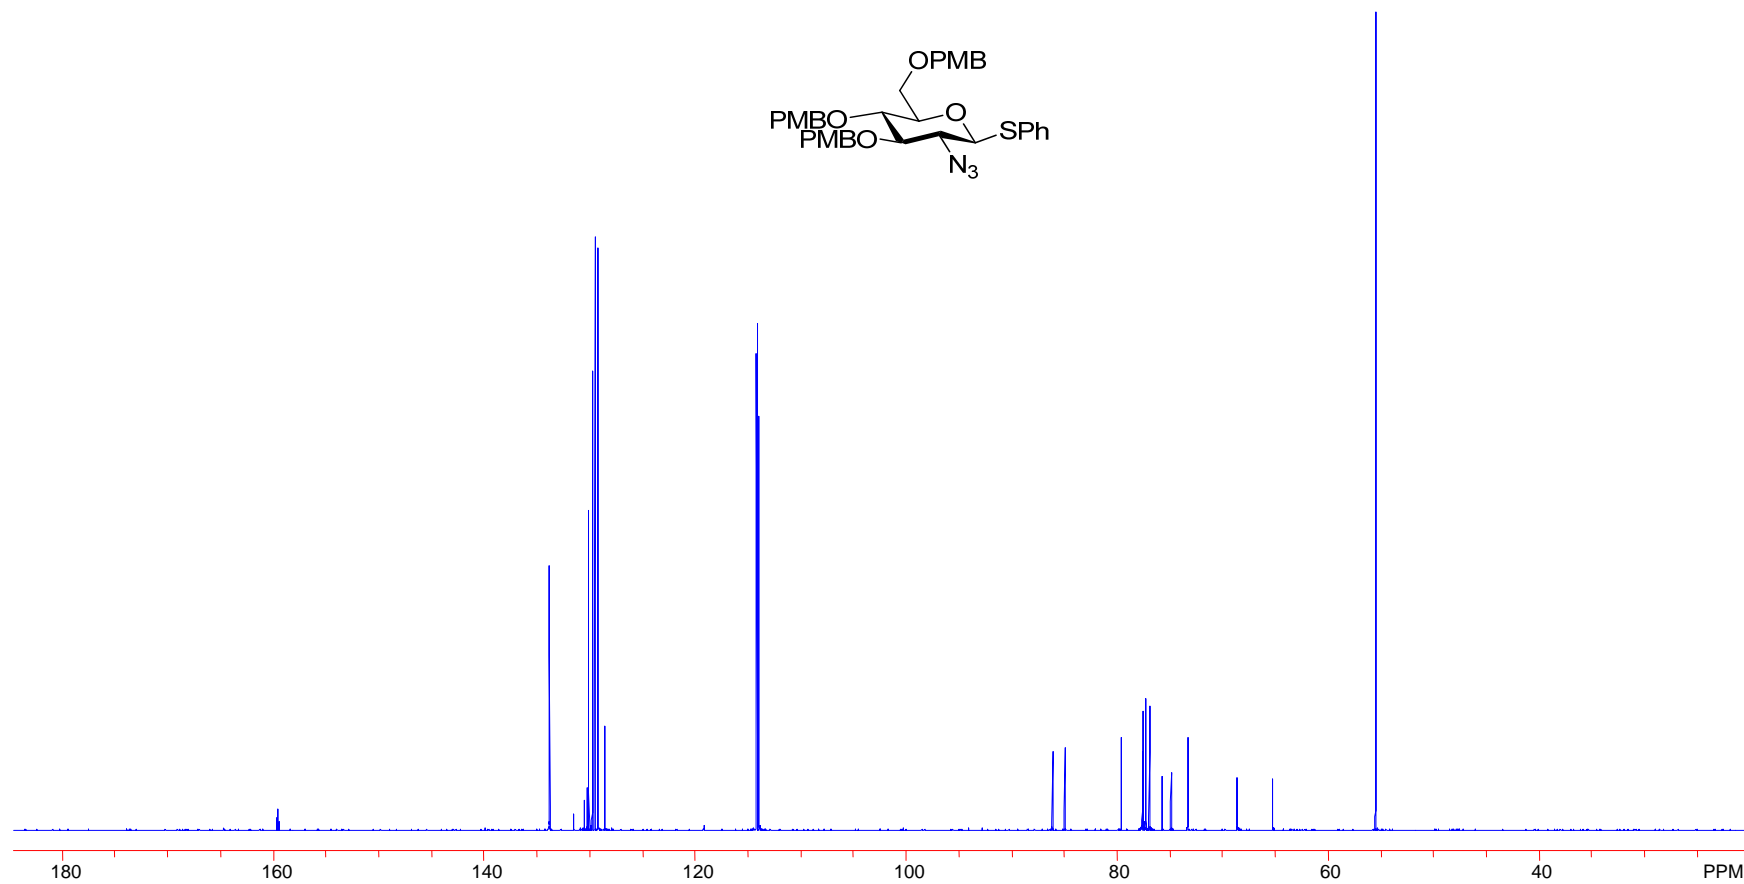

<sup>1</sup>H-NMR spectrum (CDCl<sub>3</sub>, 400 MHz) Phenyl 2-azido-2-deoxy-3,4,6-tri-*O*-(*p*-methoxybenzyl)-1-thio-β-D-glucopyranoside *S*-Oxide (**47**).

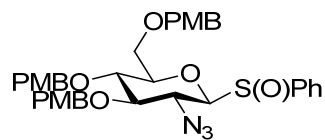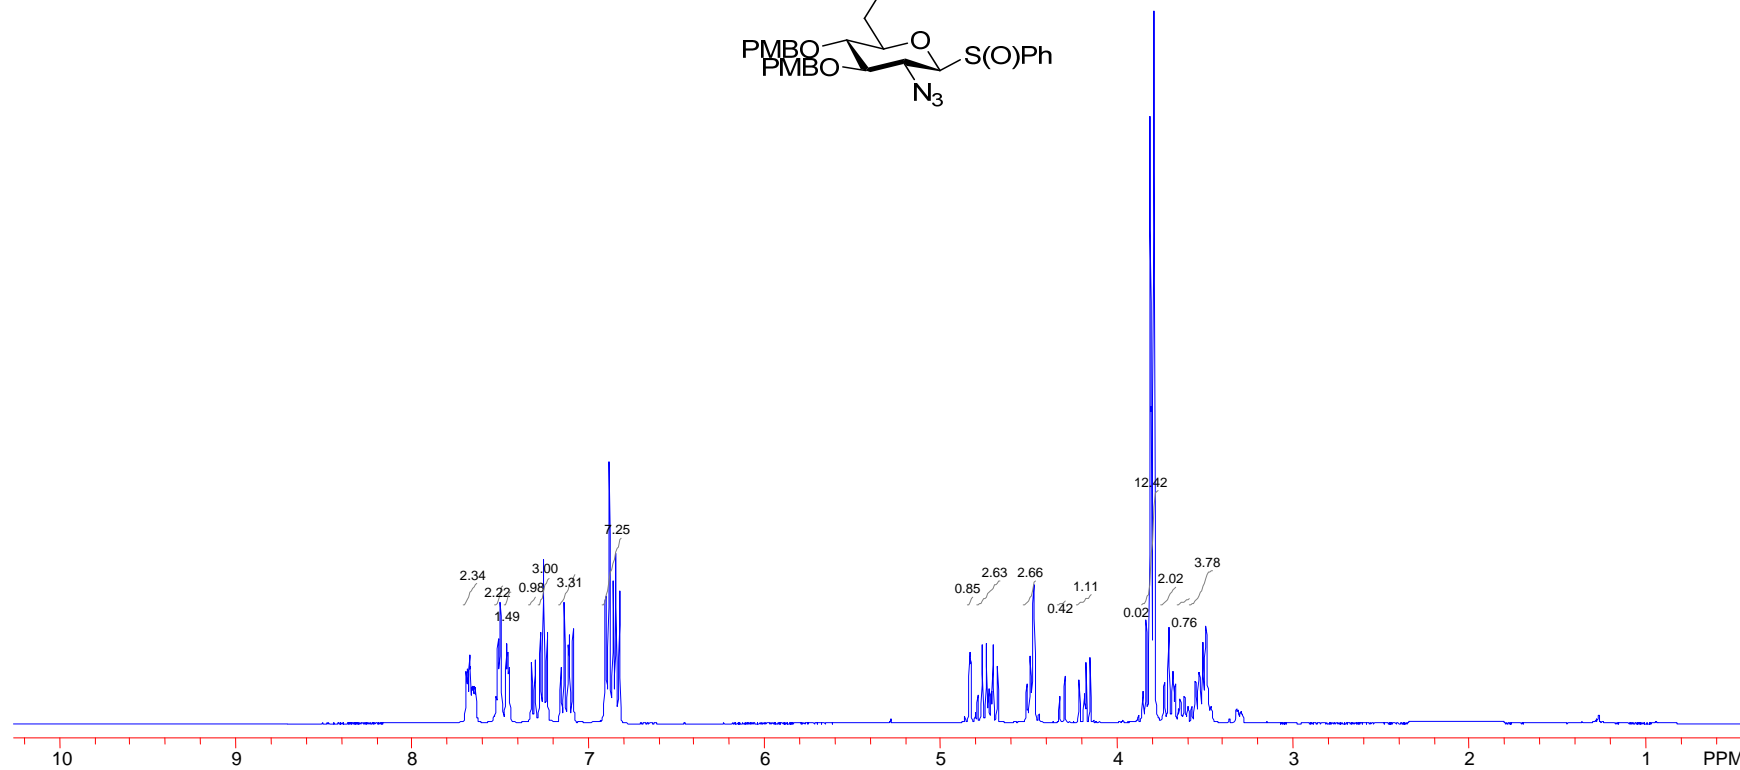

$^{13}\text{C}$ -NMR spectrum ( $\text{CDCl}_3$ , 100 MHz) Phenyl 2-azido-2-deoxy-3,4,6-tri-*O*-(*p*-methoxybenzyl)-1-thio- $\beta$ -D-glucopyranoside *S*-Oxide (**47**).

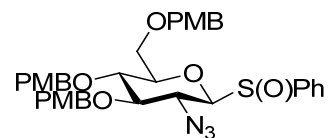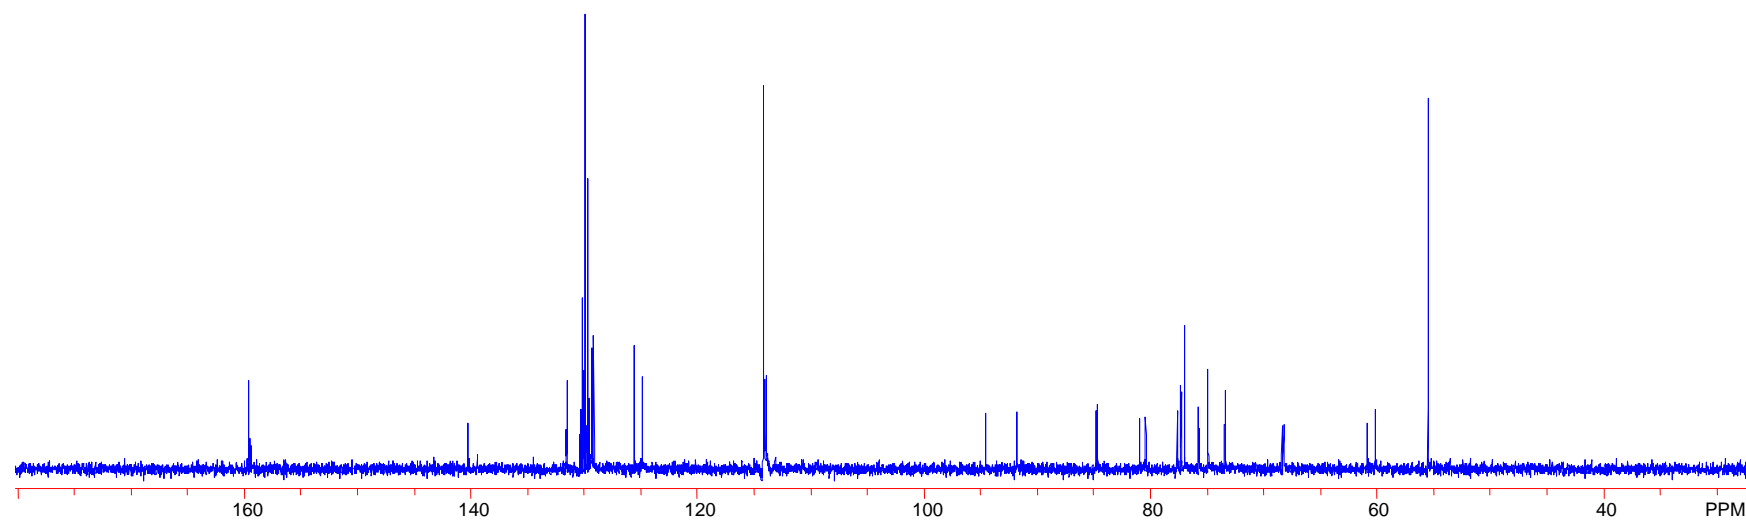

<sup>1</sup>H-NMR spectrum (CDCl<sub>3</sub>, 400 MHz) Phenyl 3,4,6-tri-*O*-acetyl-2-deoxy-1-thio-2-(2,2,2-trichloroethoxycarbonylamino)-β-D-glucopyranoside (77).

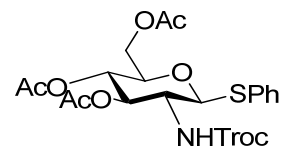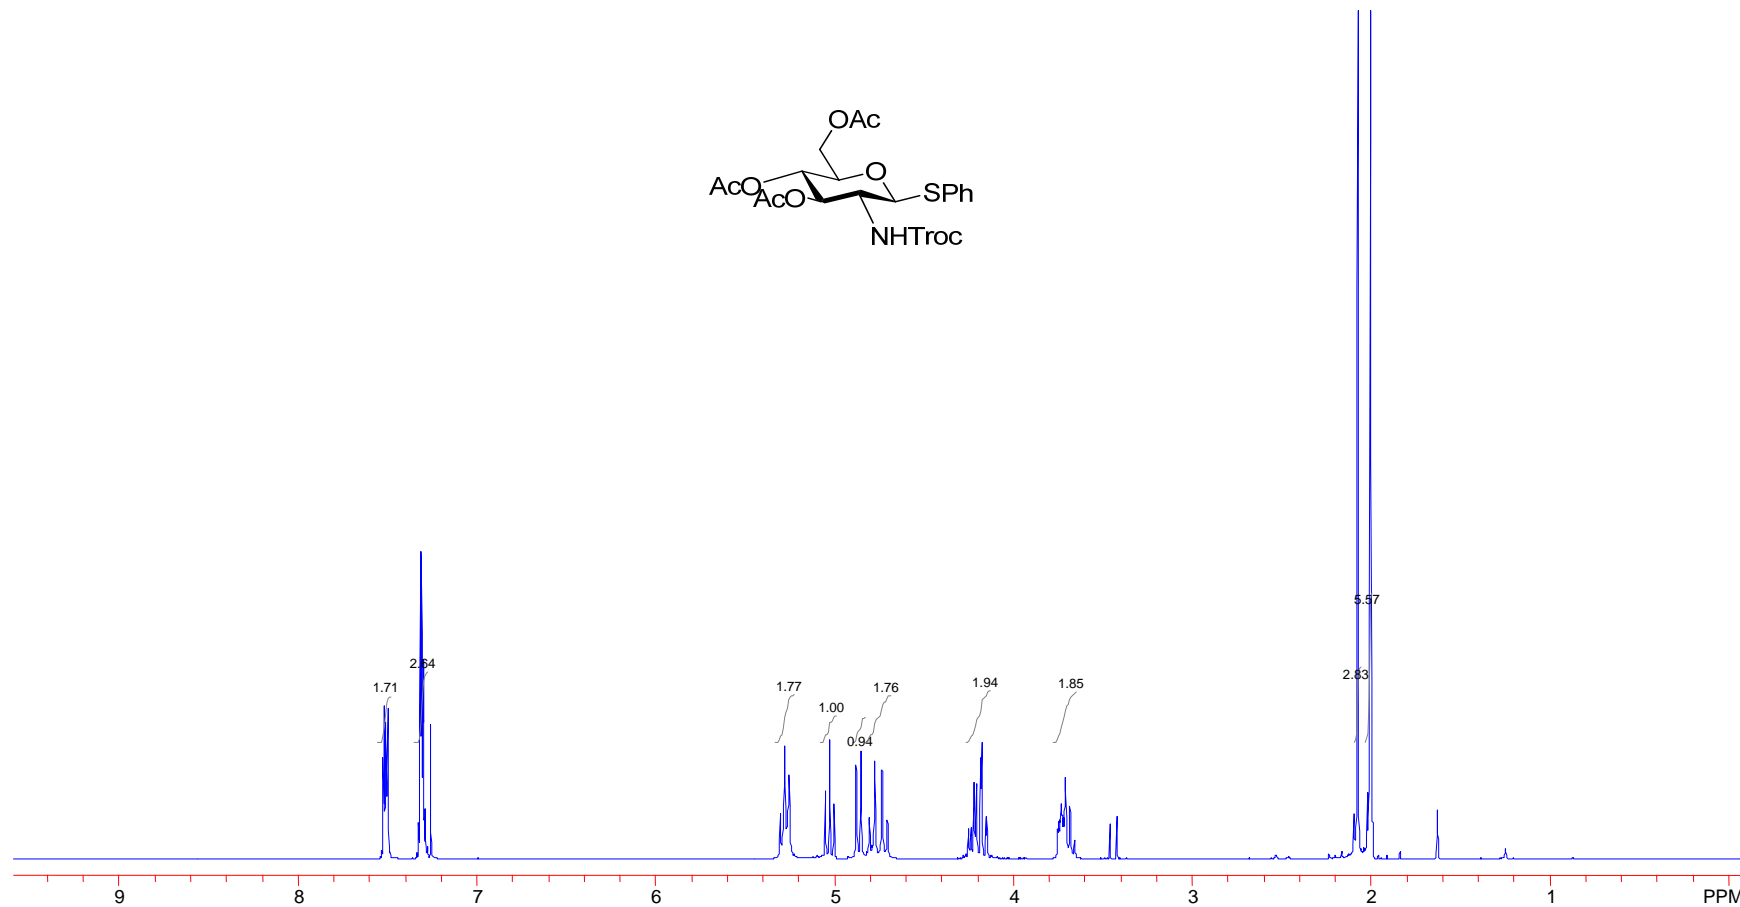

$^{13}\text{C}$ -NMR spectrum ( $\text{CDCl}_3$ , 100 MHz) Phenyl 3,4,6-tri-*O*-acetyl-2-deoxy-1-thio-2-(2,2,2-trichloroethoxycarbonylamino)- $\beta$ -D-glucopyranoside (77).

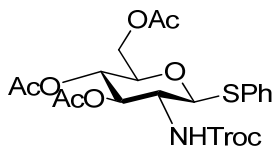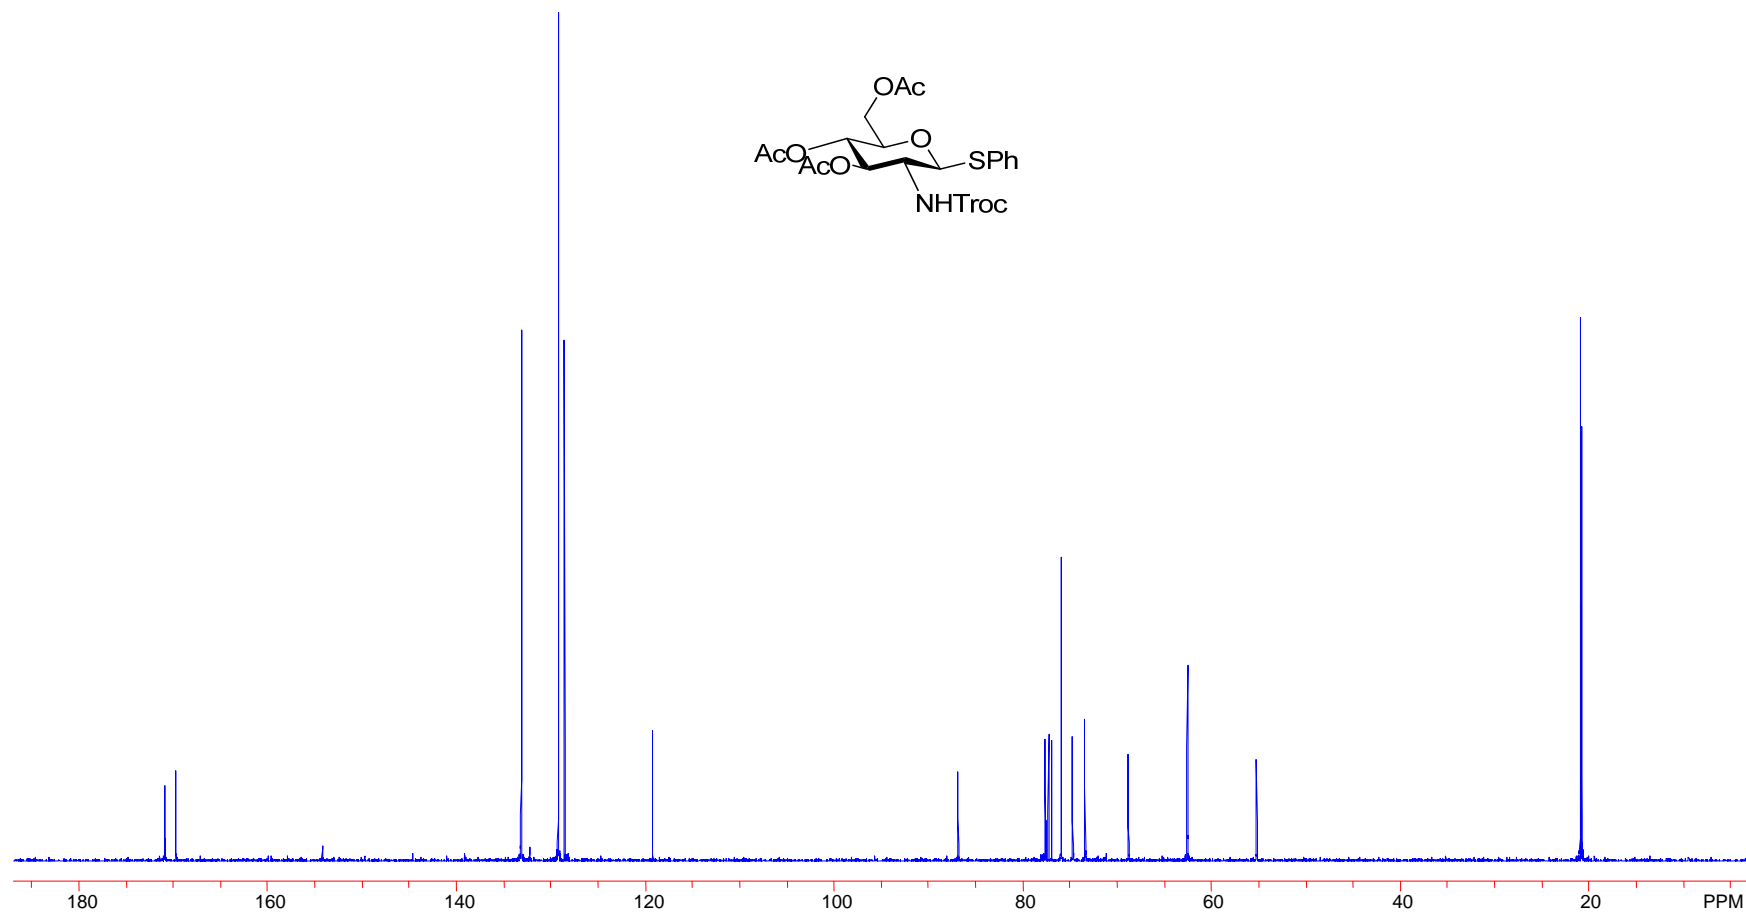

<sup>1</sup>H-NMR spectrum (CDCl<sub>3</sub>, 400 MHz) Methyl 3,4,6-tri-*O*-acetyl-2-(2,2,2-trichloroethoxycarbonylamino)-2-deoxy-β-D-glucopyranoside (**79**).

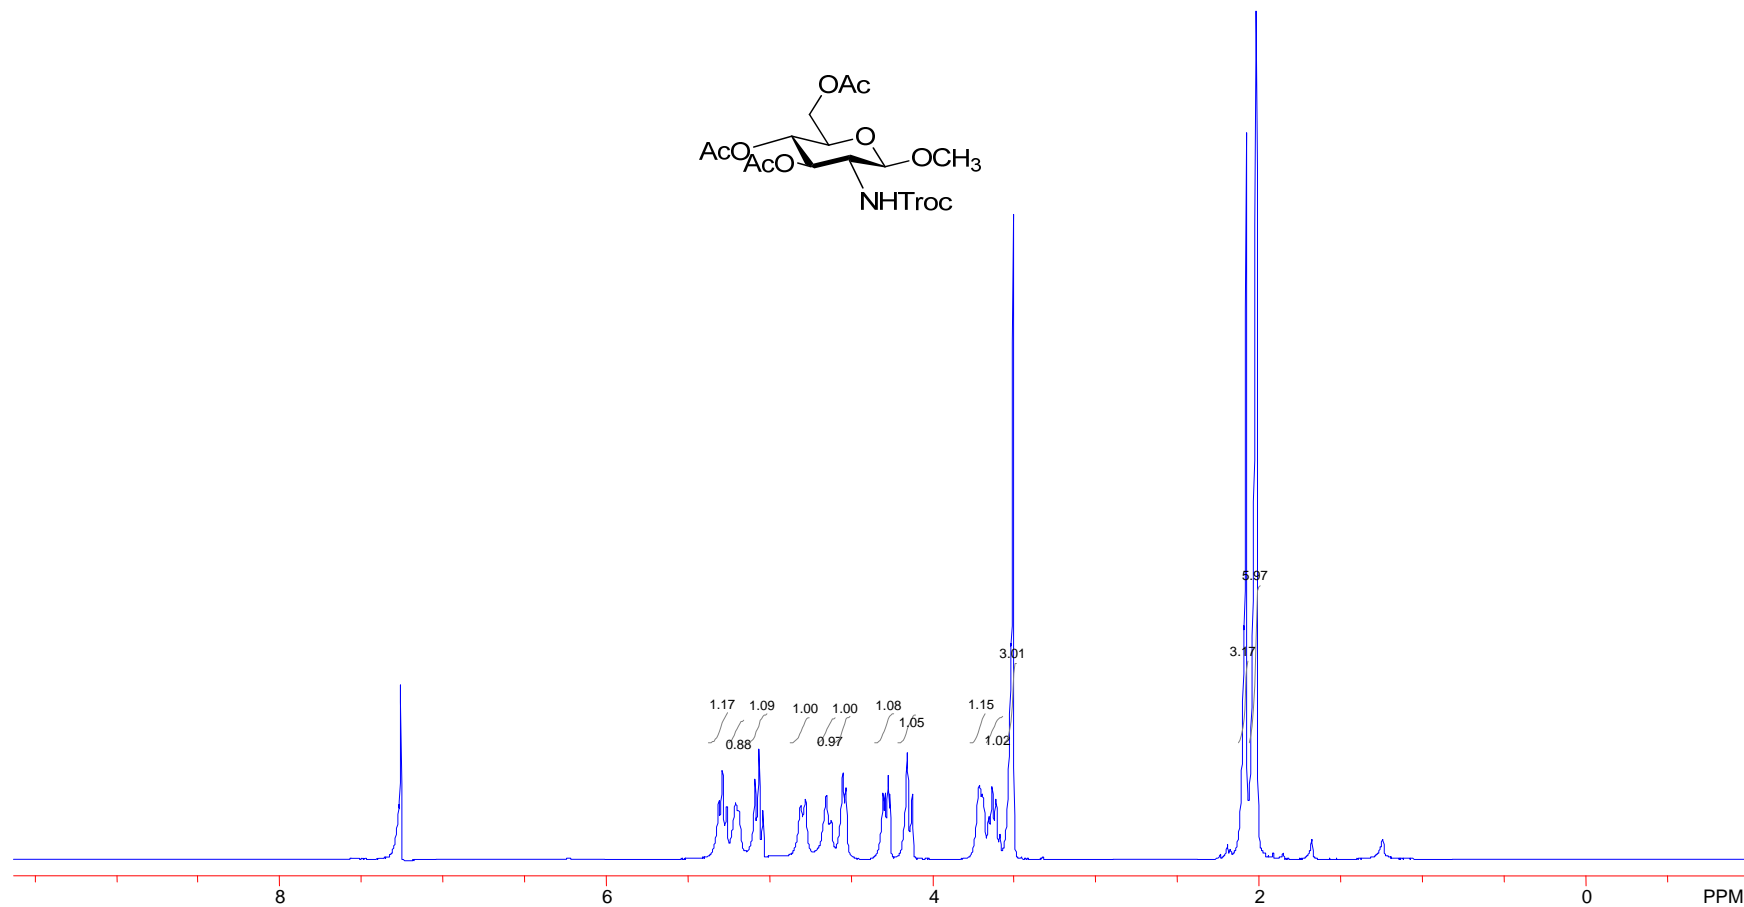

$^{13}\text{C}$ -NMR spectrum ( $\text{CDCl}_3$ , 100 MHz) Methyl 3,4,6-tri-*O*-acetyl-2-(2,2,2-trichloroethoxycarbonylamino)-2-deoxy- $\beta$ -D-glucopyranoside (**79**).

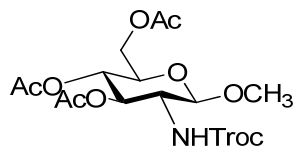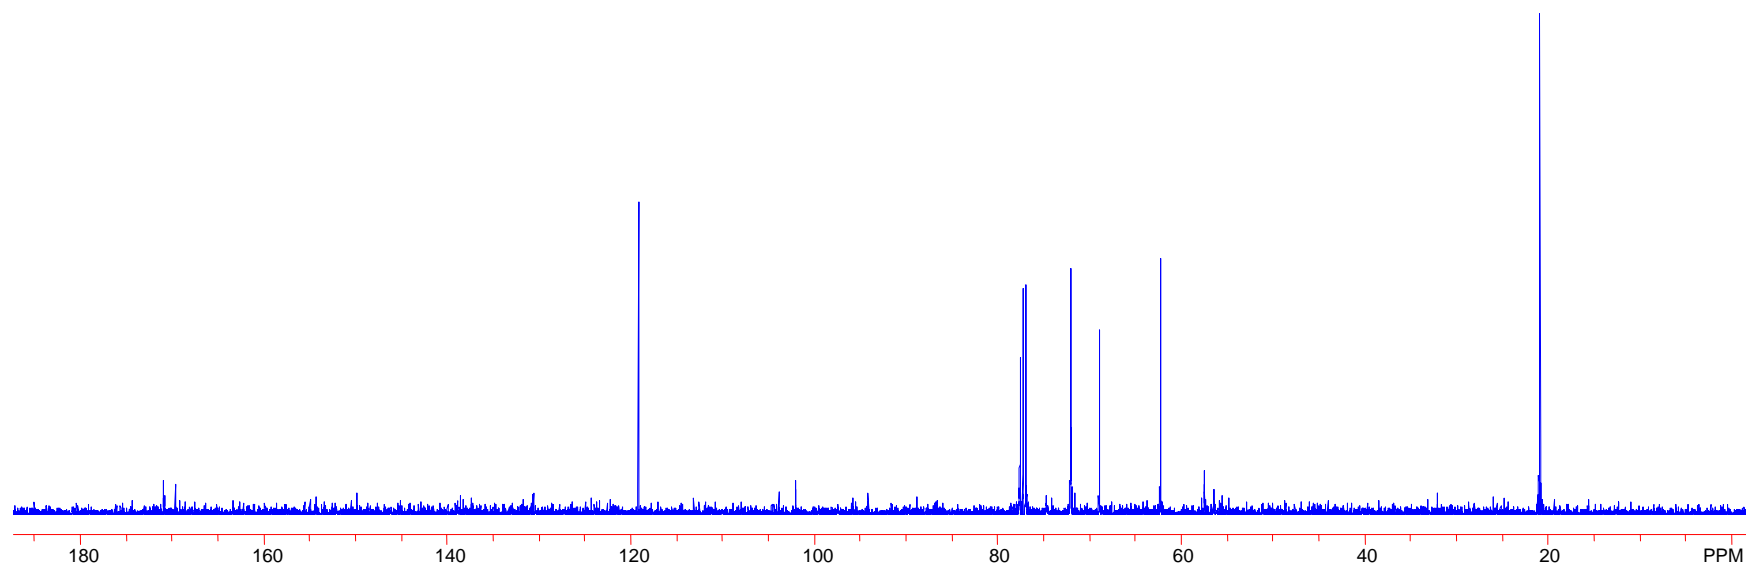

$^1\text{H-NMR}$  spectrum ( $\text{CDCl}_3$ , 400 MHz) Methyl 3,4-*O*-(2,3-dimethoxybutane-2,3-diyl)-2-(2,2,2-trichloroethoxycarbonylamino)-2-deoxy- $\beta$ -D-glucopyranoside (**81**).

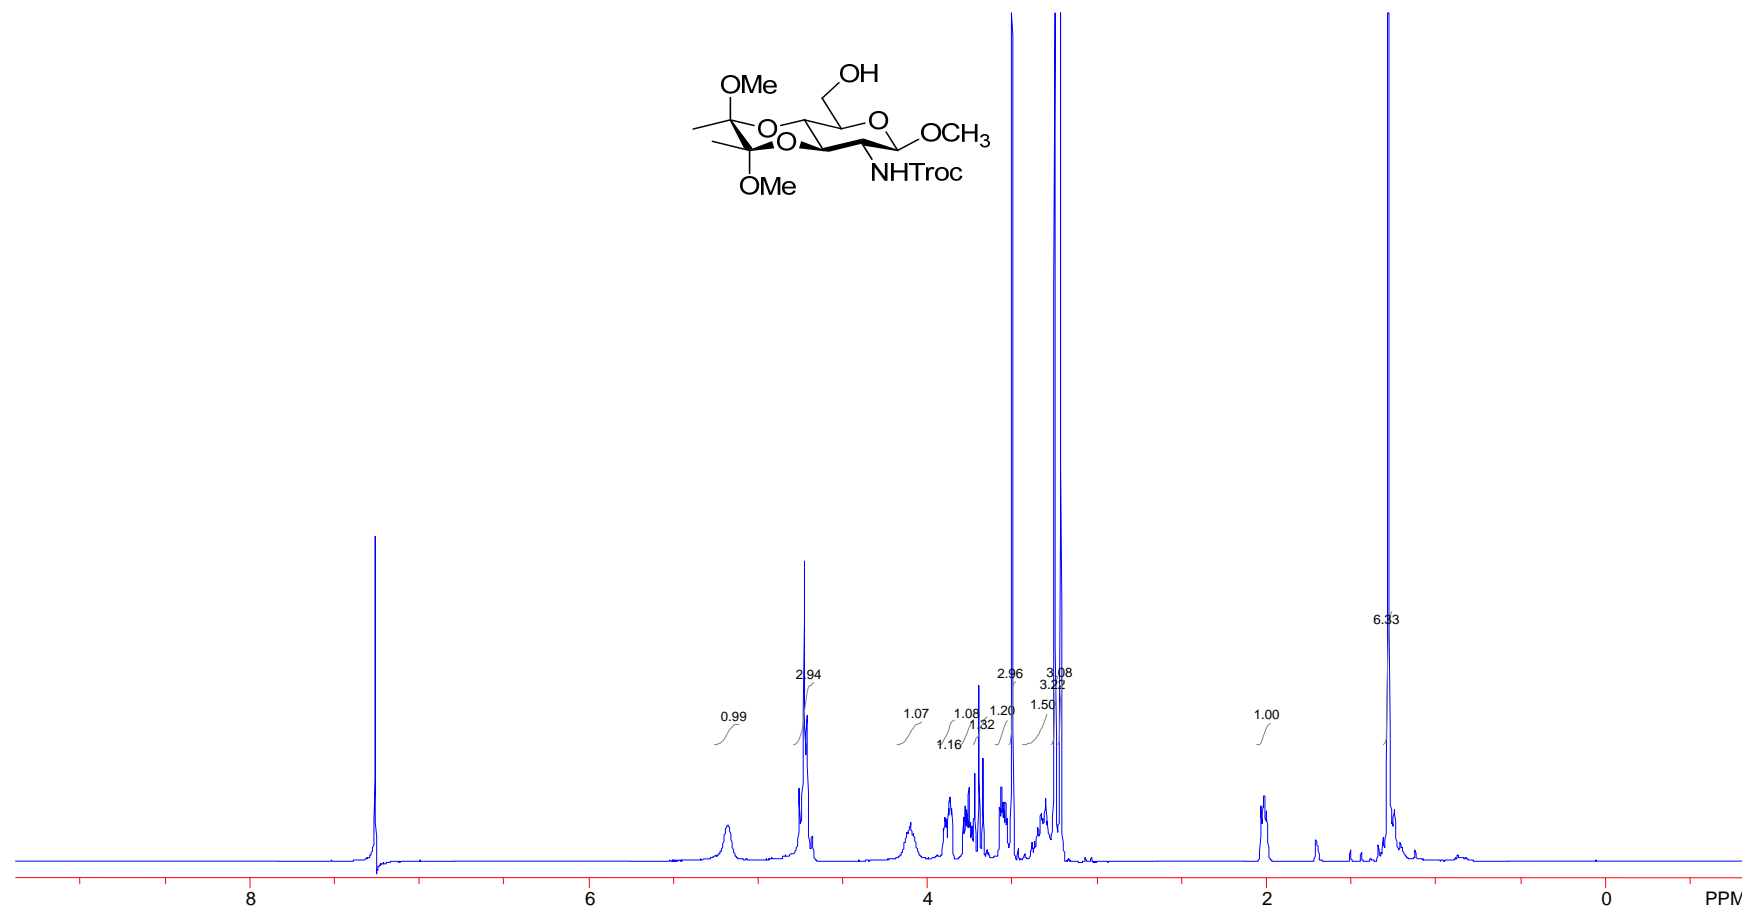

S-88



$^{13}\text{C}$ -NMR spectrum ( $\text{CDCl}_3$ , 100 MHz) Methyl 3,4-*O*-(2,3-dimethoxybutane-2,3-diyl)-2-(2,2,2-trichloroethoxycarbonylamino)-2-deoxy- $\beta$ -D-glucopyranoside (**81**).

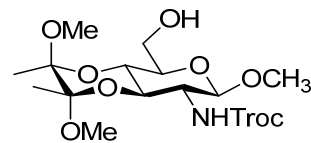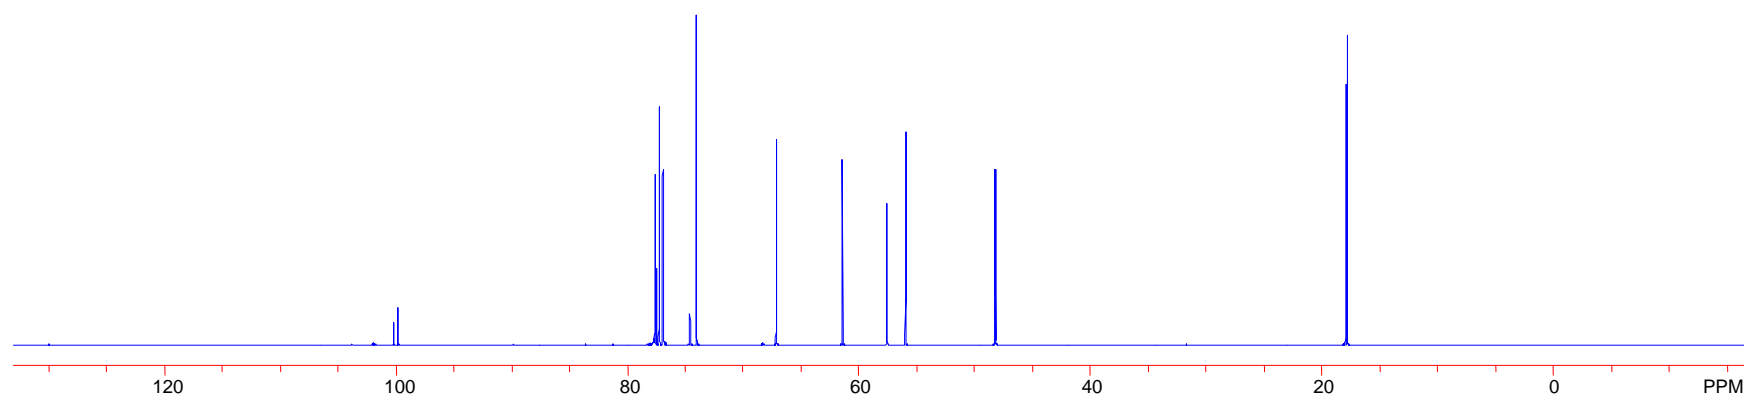

<sup>1</sup>H-NMR spectrum (CDCl<sub>3</sub>, 400 MHz) Phenyl 3,4,6-*O*-acetyl-2-deoxy-1-thio-2-(2,2,2-trichloroethoxycarbonylamino)-β-D-glucopyranoside *S*-Oxide (**78**).

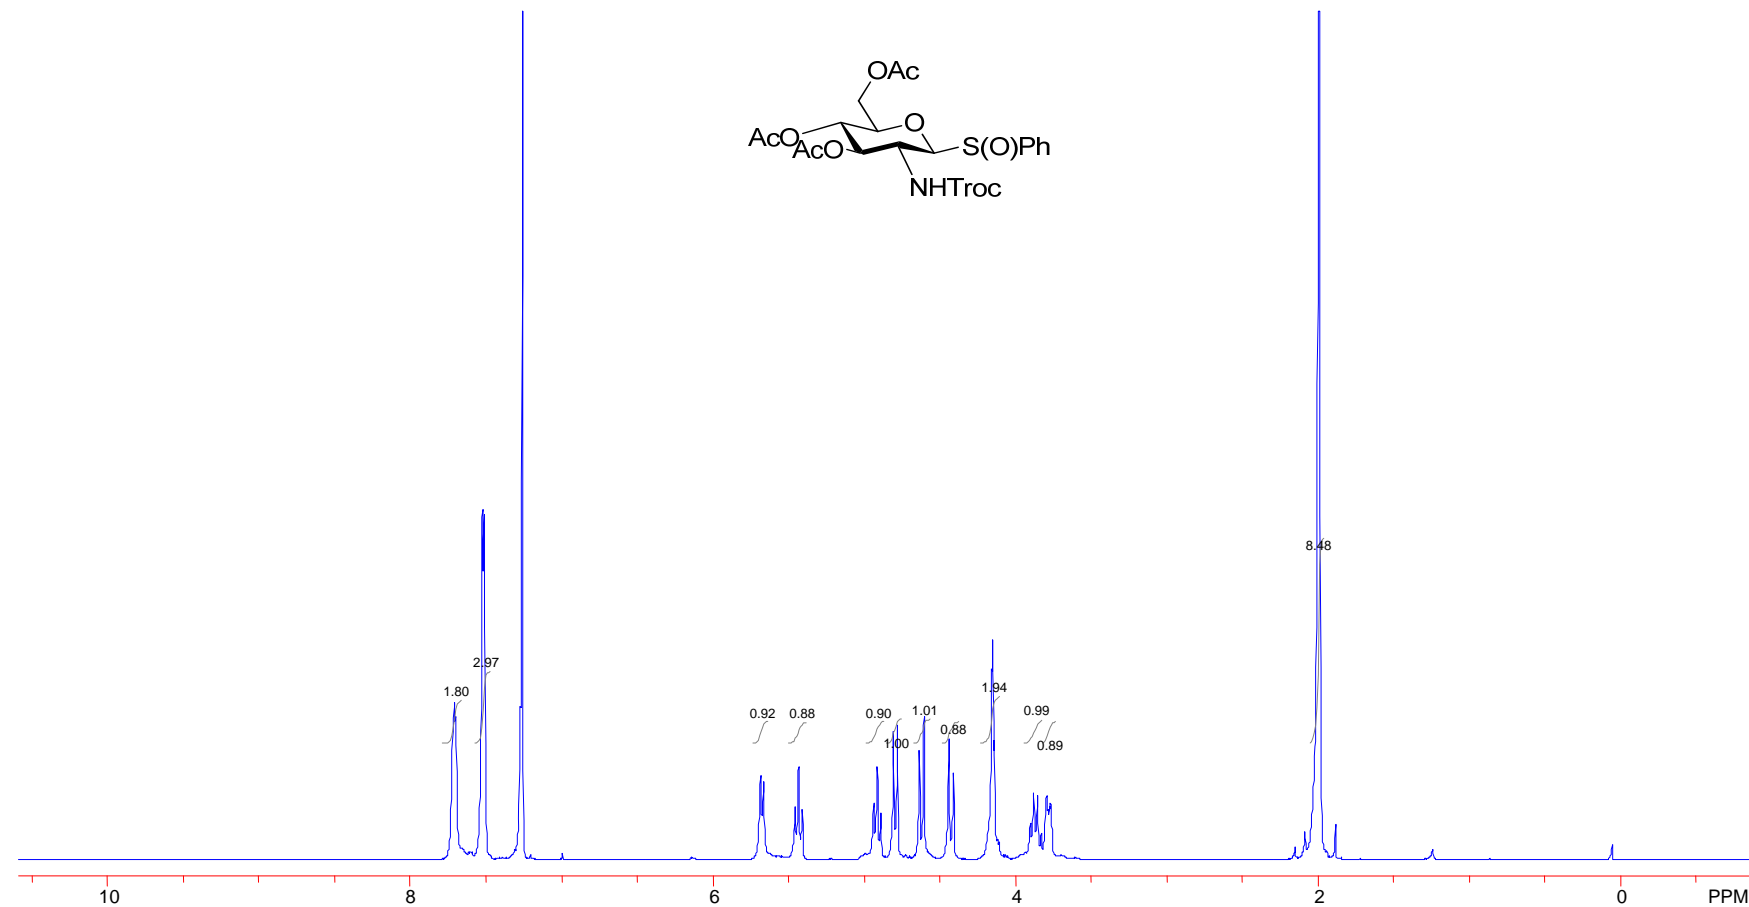

S-90

$^{13}\text{C}$ -NMR spectrum ( $\text{CDCl}_3$ , 100 MHz) Phenyl 3,4,6-*O*-acetyl-2-deoxy-1-thio-2-(2,2,2-trichloroethoxycarbonylamino)- $\beta$ -D-glucopyranoside *S*-Oxide (**78**).

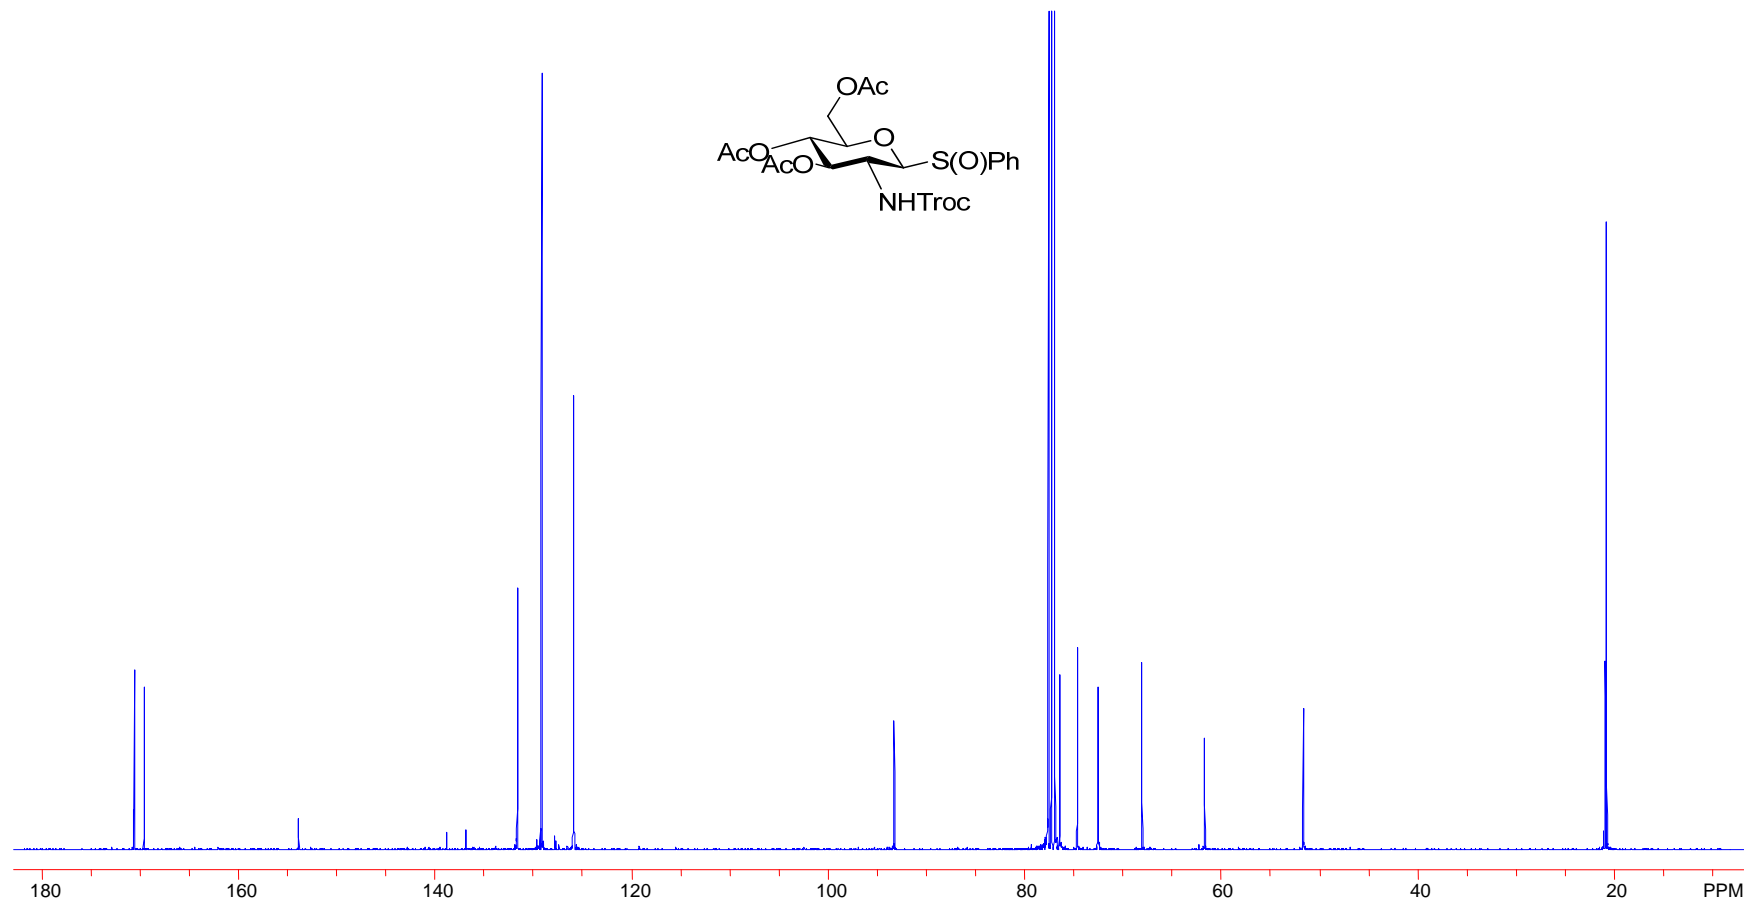

<sup>1</sup>H-NMR spectrum (CDCl<sub>3</sub>, 400 MHz) Phenyl 2-deoxy-3,4-*O*-(2,3-dimethoxybutane-2,3-diyl)-1-thio-2-(2,2,2-trichloroethoxycarbonylamino)-β-D-glucopyranoside (**83**).

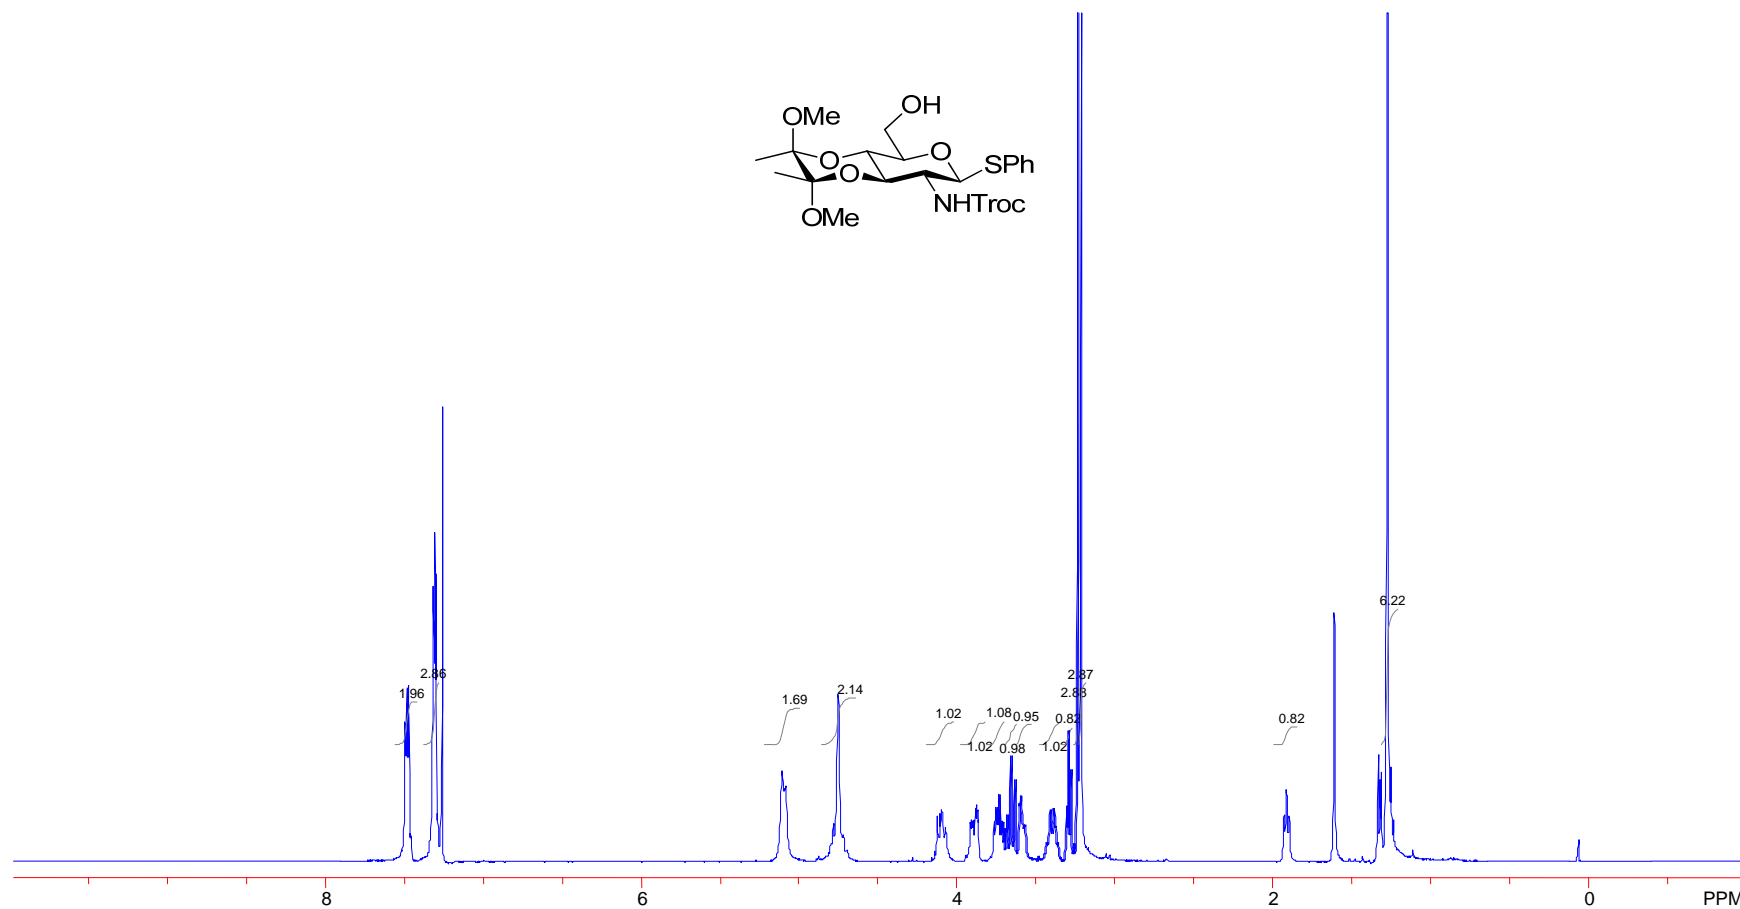

$^{13}\text{C}$ -NMR spectrum ( $\text{CDCl}_3$ , 100 MHz) Phenyl 2-deoxy-3,4-*O*-(2,3-dimethoxybutane-2,3-diyl)-1-thio-2-(2,2,2-trichloroethoxycarbonylamino)- $\beta$ -D-glucopyranoside (**83**).

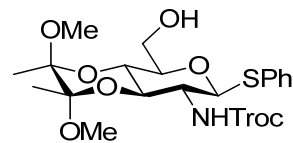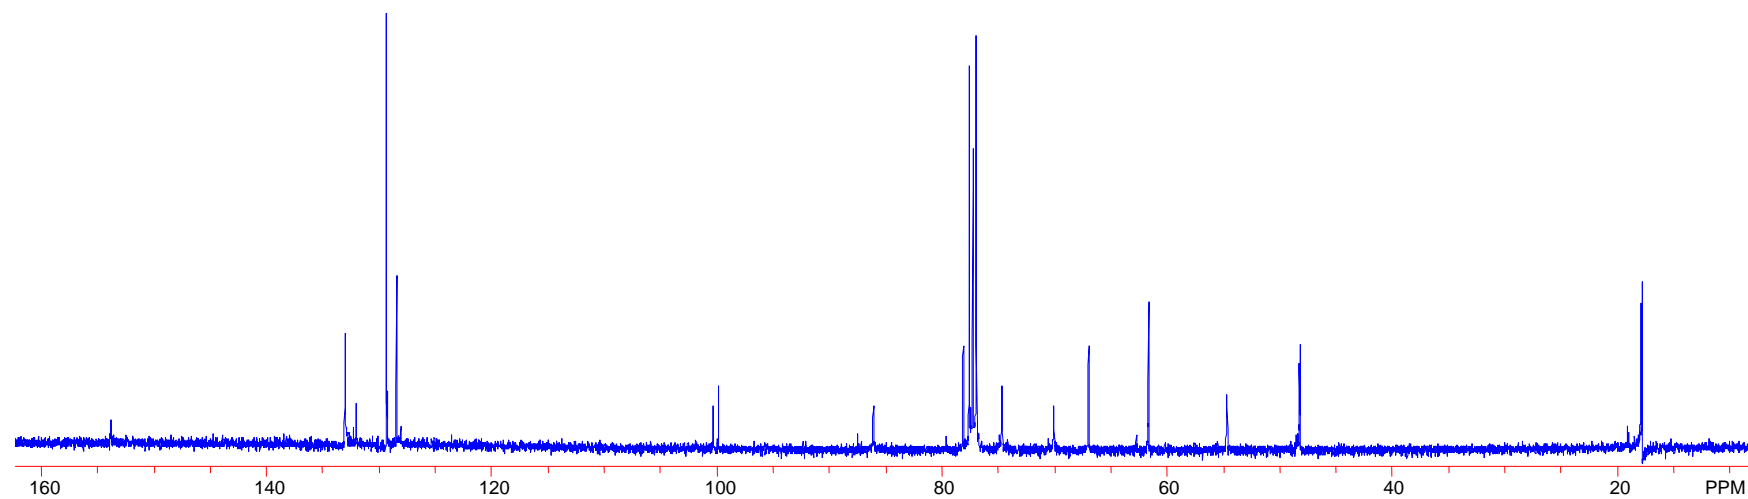

<sup>1</sup>H-NMR spectrum (CDCl<sub>3</sub>, 400 MHz) Phenyl 2-deoxy-3,4-*O*-(2,3-dimethoxybutane-2,3-diyl)-1-thio-6-*O*-*p*-toluenesulfonyl-2-(2,2,2-trichloroethoxycarbonylamino)-β-D-glucopyranoside (**57**).

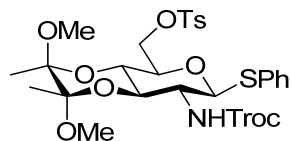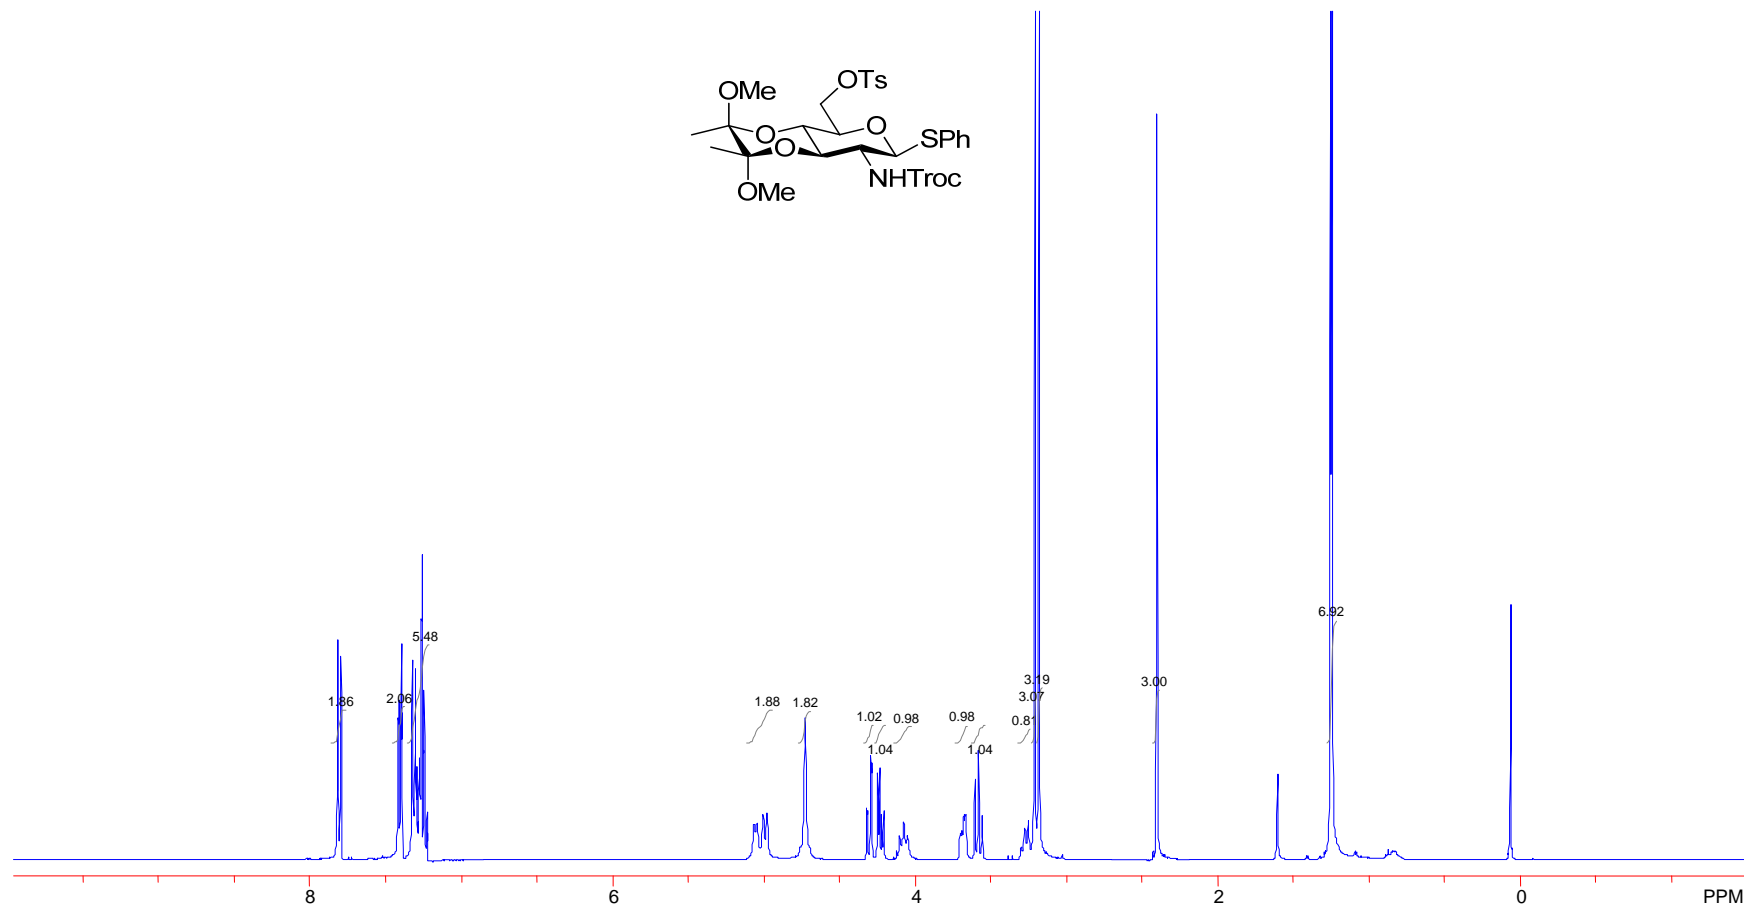

$^1\text{H-NMR}$  spectrum ( $\text{CDCl}_3$ , 400 MHz) Phenyl 2-deoxy-3,4-*O*-(2,3-dimethoxybutane-2,3-diyl)-1-thio-6-*O*-*p*-toluenesulfonyl-2-(2,2,2-trichloroethoxycarbonylamino)- $\beta$ -D-glucopyranoside (**57**).

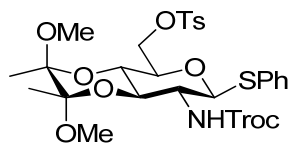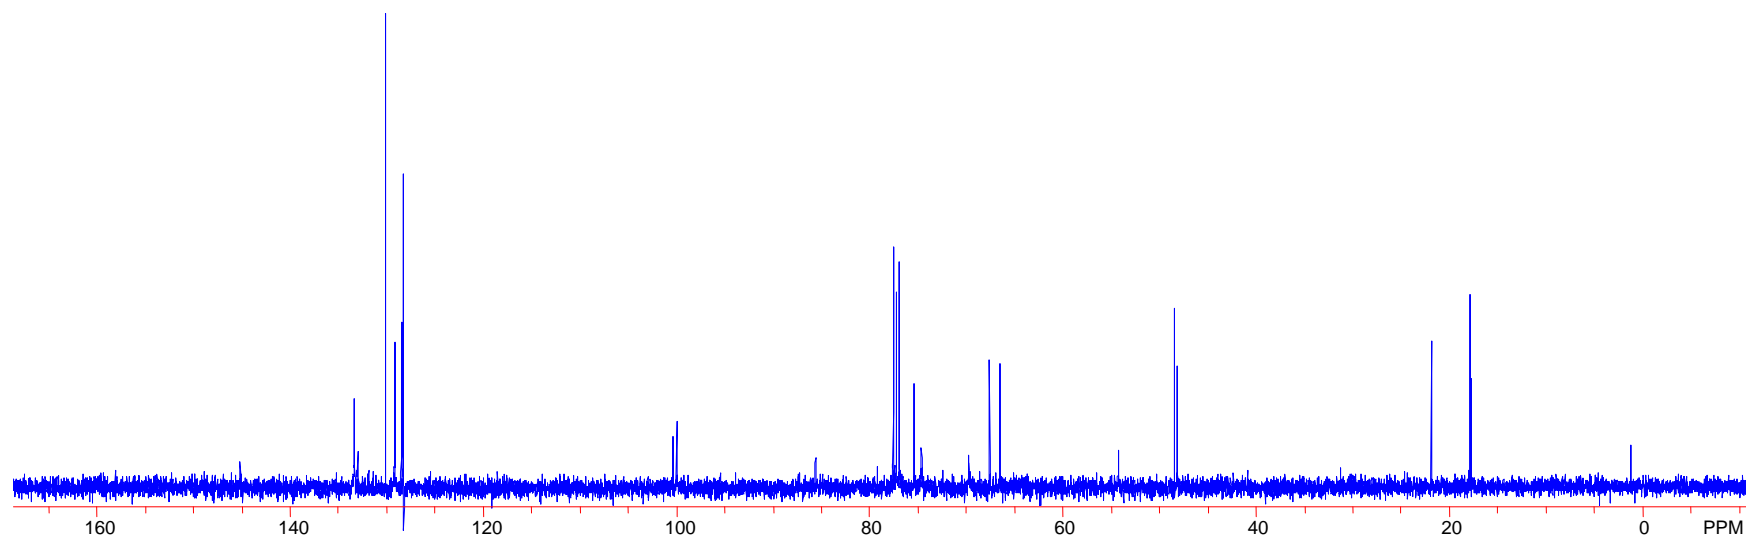

$^1\text{H-NMR}$  spectrum ( $\text{CDCl}_3$ , 400 MHz) Phenyl 2-azido-2-deoxy-3,4-*O*-(2,3-dimethoxybutane-2,3-diyl)-1-thio-2'-azido-2'-deoxy-3',4',6'-tri-*O*-(*p*-methoxybenzyl)]- $\beta$ -D-gentiobioside (**49**).

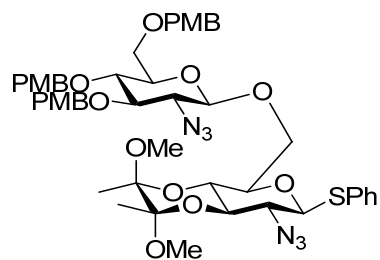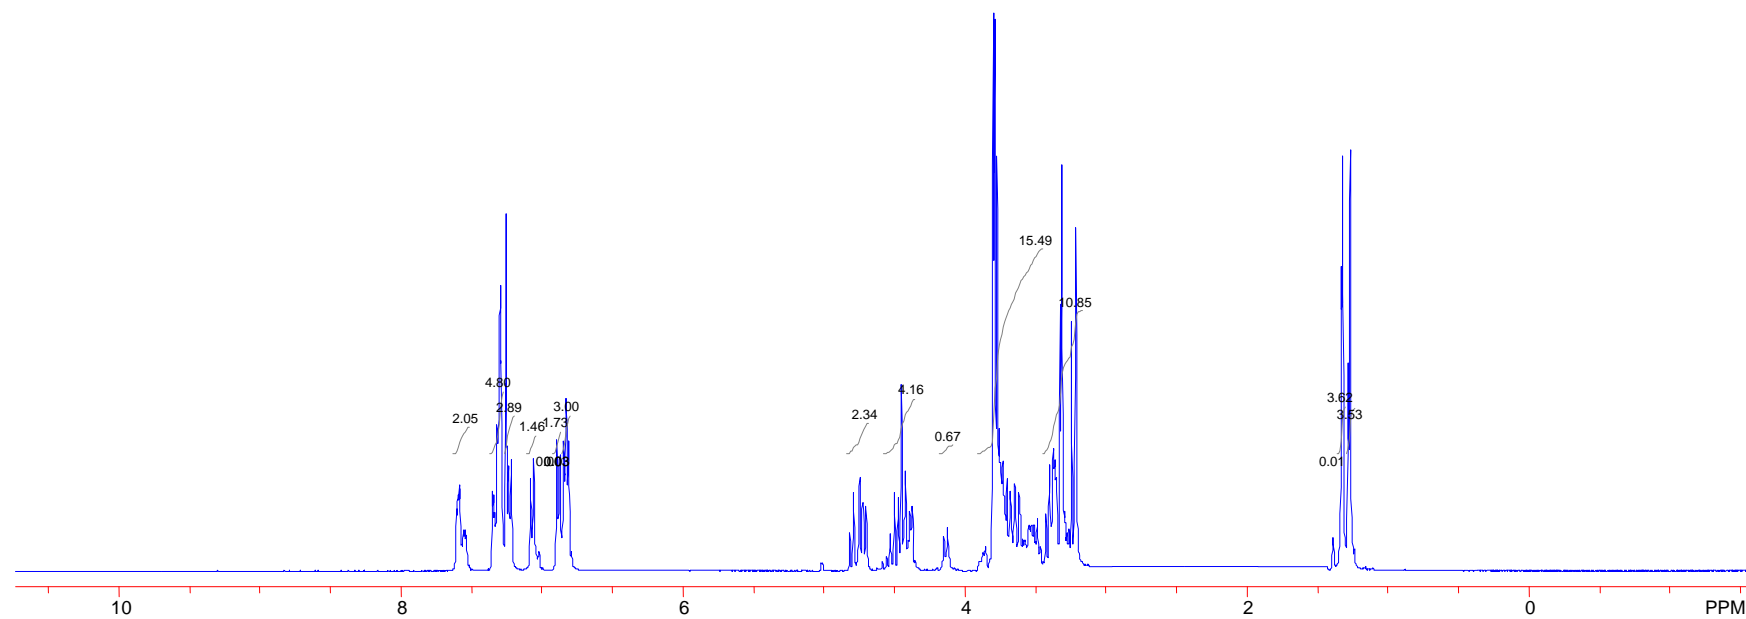



$^{13}\text{C}$ -NMR spectrum ( $\text{CDCl}_3$ , 100 MHz) Phenyl 2-azido-2-deoxy-3,4-*O*-(2,3-dimethoxybutane-2,3-diyl)-1-thio-2'-azido-2'-deoxy-3',4',6'-tri-*O*-(*p*-methoxybenzyl)]- $\beta$ -D-gentiobioside (**49**).

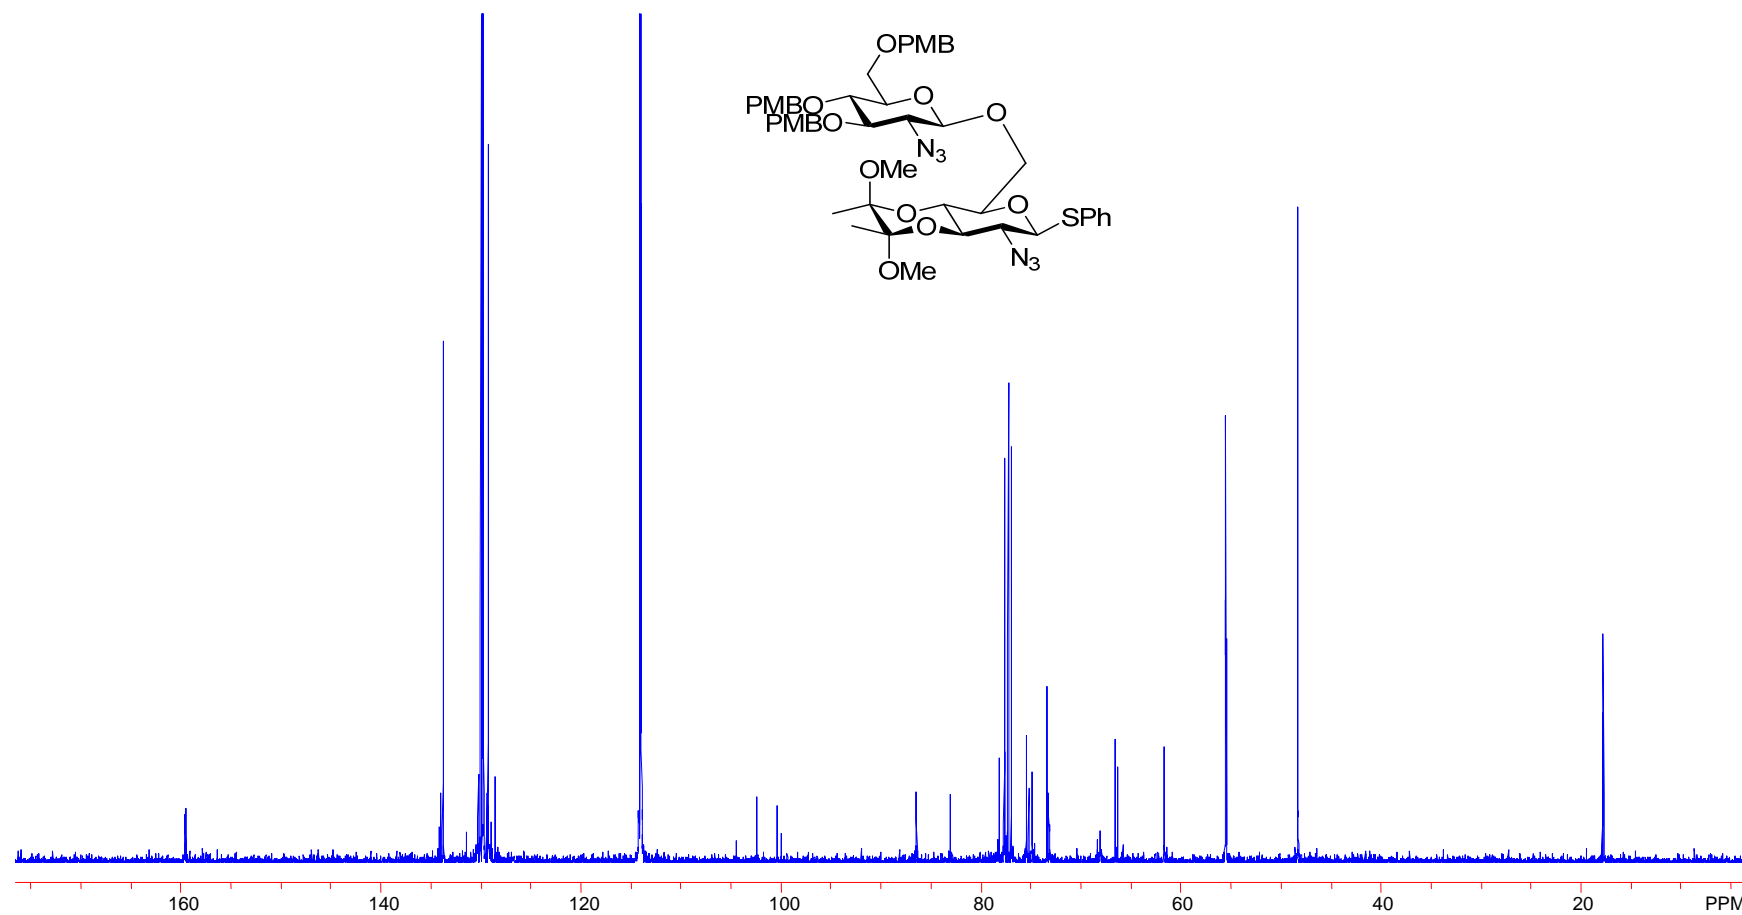

<sup>1</sup>H-NMR spectrum (CDCl<sub>3</sub>, 400 MHz) Phenyl 2-azido-2-deoxy-3,4-*O*-(2,3-dimethoxybutane-2,3-diyl)-1-thio-[2'-azido-2'-deoxy-3',4',6'-tri-*O*-(*p*-methoxybenzyl)]-β-D-gentiobioside *S*-Oxide (**50**).

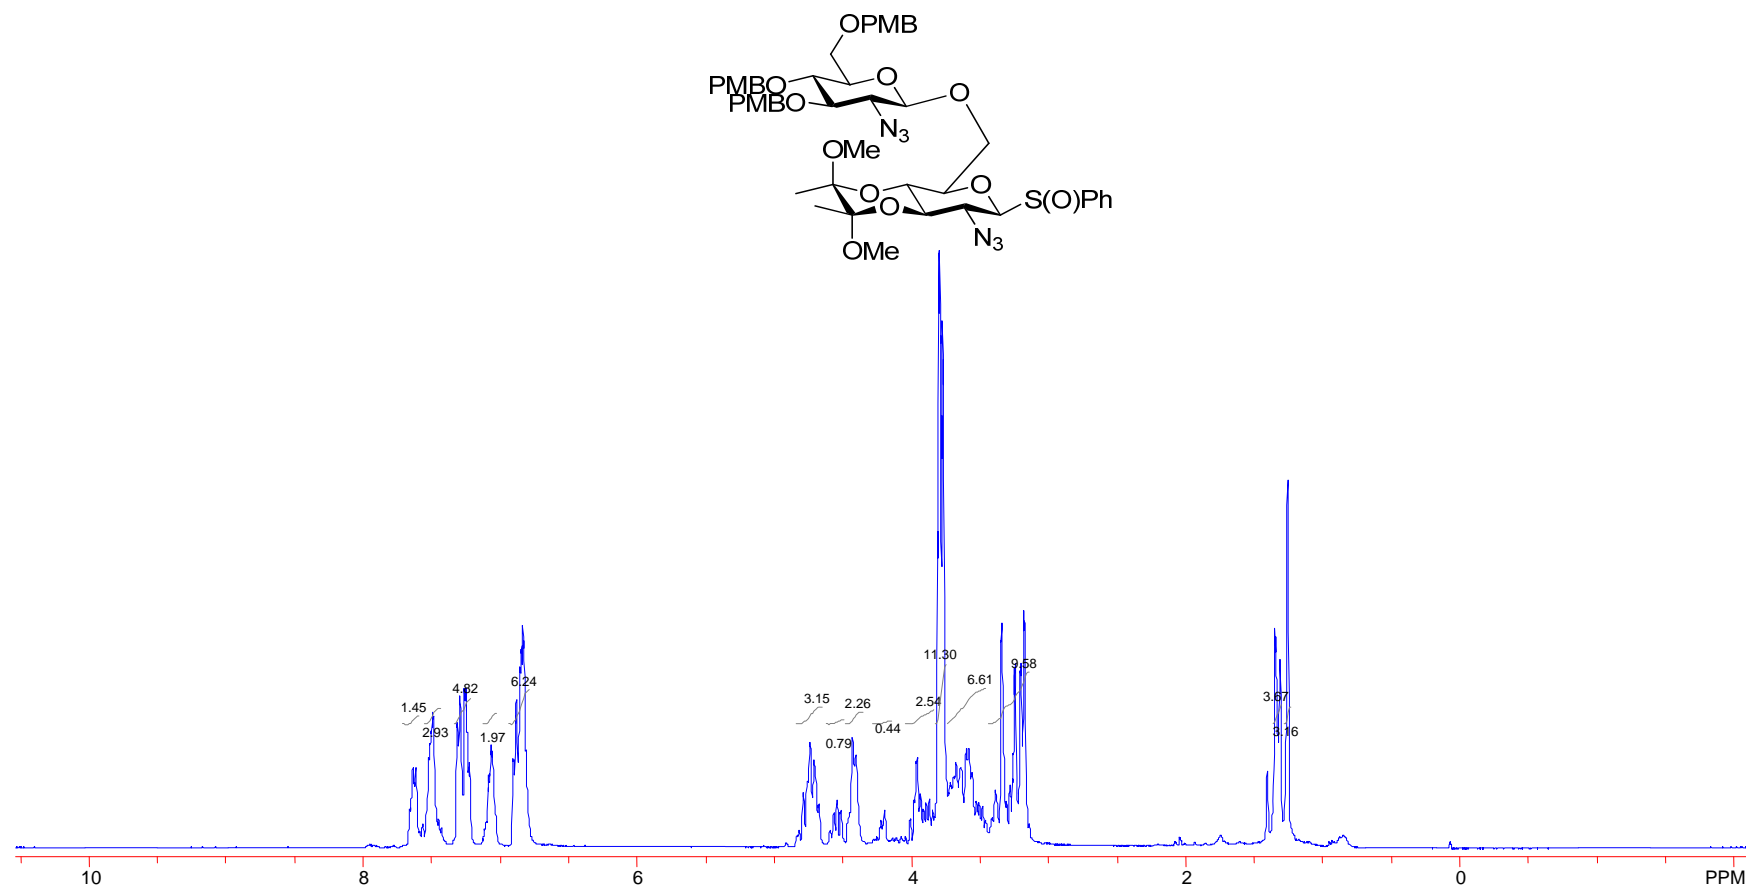

S-98

$^{13}\text{C}$ -NMR spectrum ( $\text{CDCl}_3$ , 100 MHz) Phenyl 2-azido-2-deoxy-3,4-*O*-(2,3-dimethoxybutane-2,3-diyl)-1-thio-[2'-azido-2'-deoxy-3',4',6'-tri-*O*-(*p*-methoxybenzyl)]- $\beta$ -D-gentiobioside *S*-Oxide (**50**).

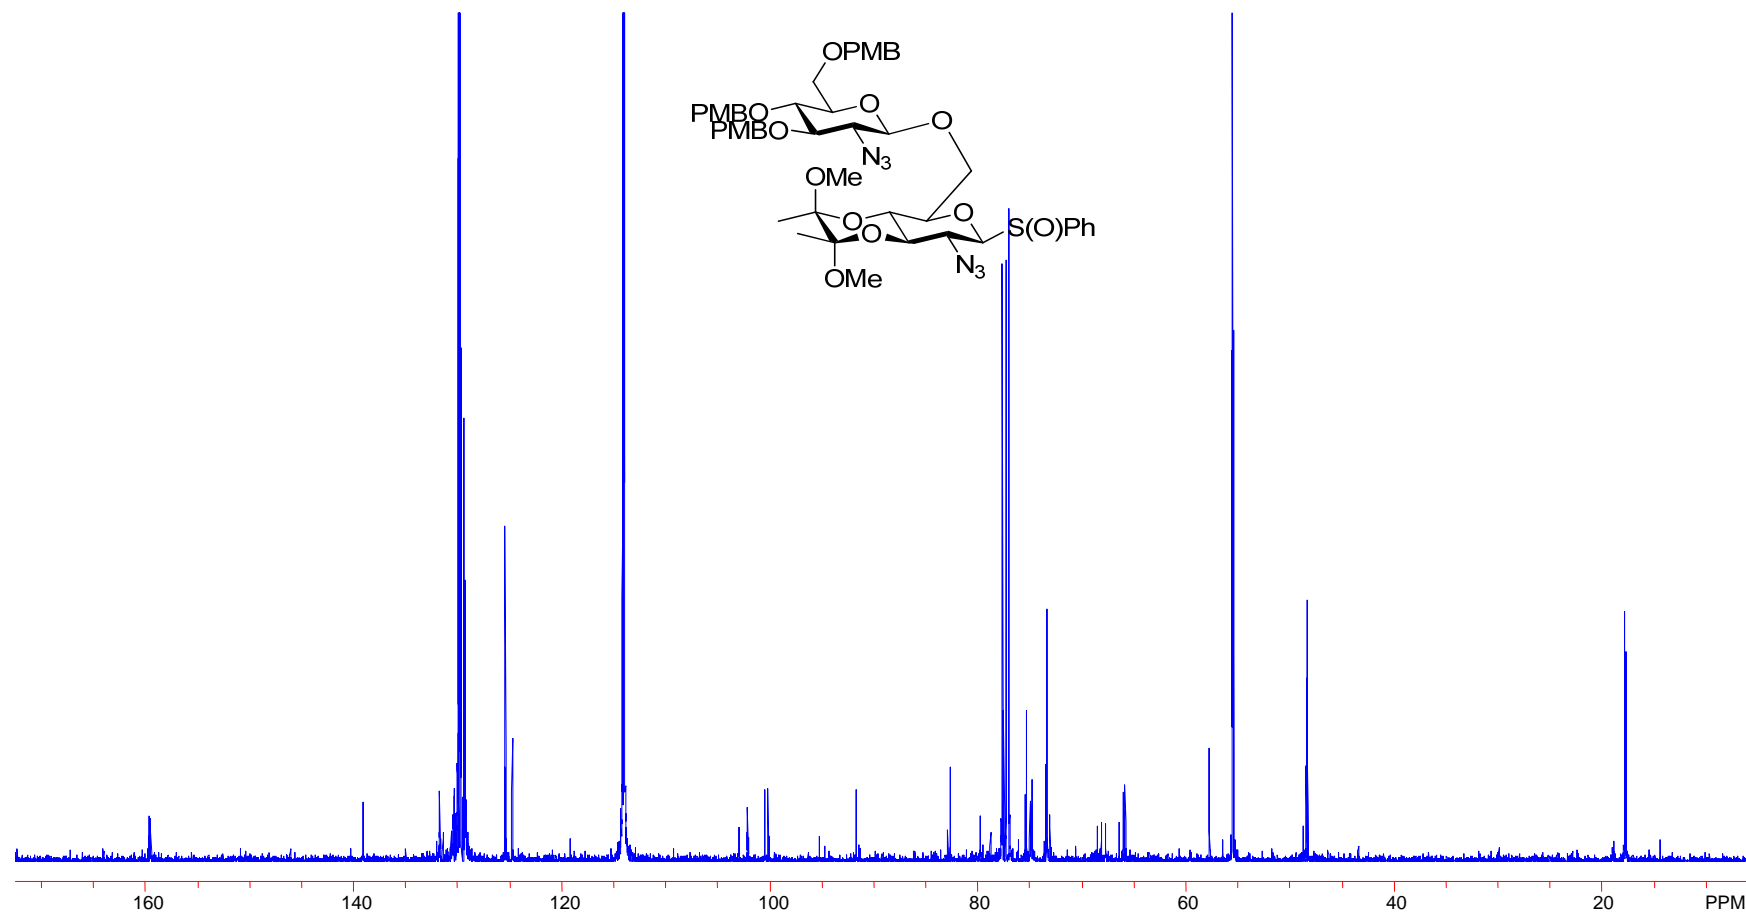

$^1\text{H-NMR}$  spectrum ( $\text{CDCl}_3$ , 400 MHz) 2-(Phenyloxycarbonylthioxy-but-3-enyl 2-azido-2-deoxy-3,4-*O*-(2,3-dimethoxybutane-2,3-diyl)-[2'-azido-2'-deoxy-3',4',6'-tri-*O*-(*p*-methoxybenzyl)]- $\beta$ -D-gentiobioside (**51**).

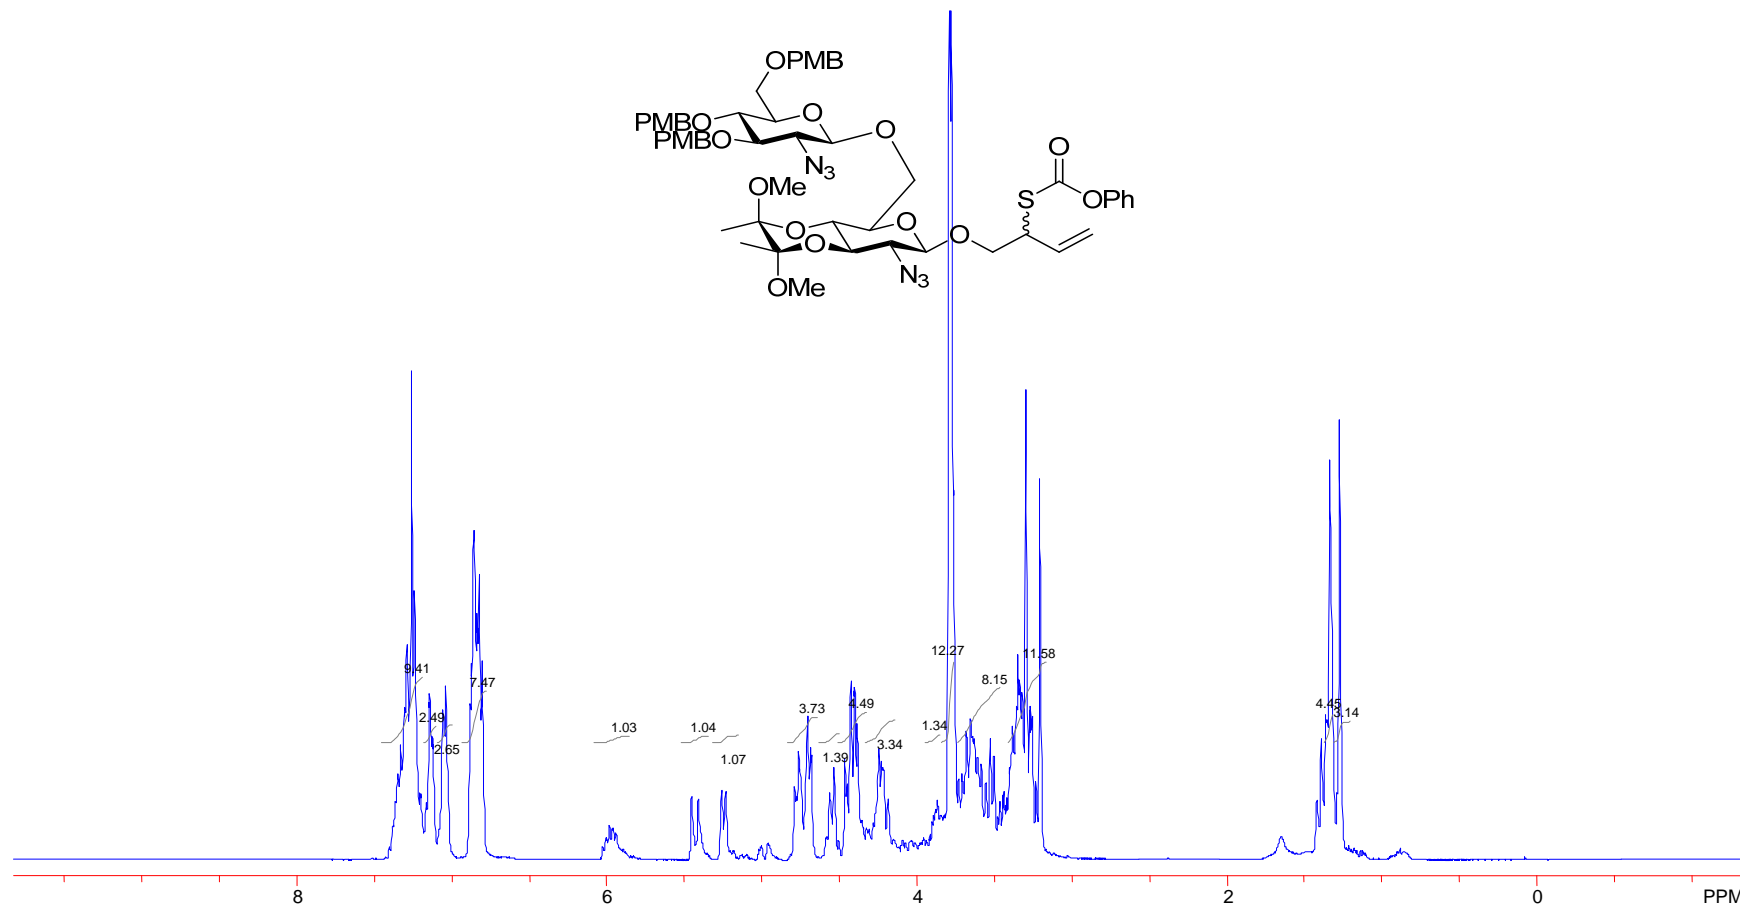

$^{13}\text{C}$ -NMR spectrum ( $\text{CDCl}_3$ , 125 MHz) 2-(Phenyloxycarbonylthioxy-but-3-enyl 2-azido-2-deoxy-3,4-*O*-(2,3-dimethoxybutane-2,3-diyl)-[2'-azido-2'-deoxy-3',4',6'-tri-*O*-(*p*-methoxybenzyl)]- $\beta$ -D-gentiobioside (**51**).

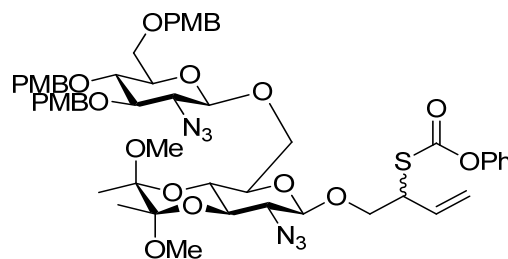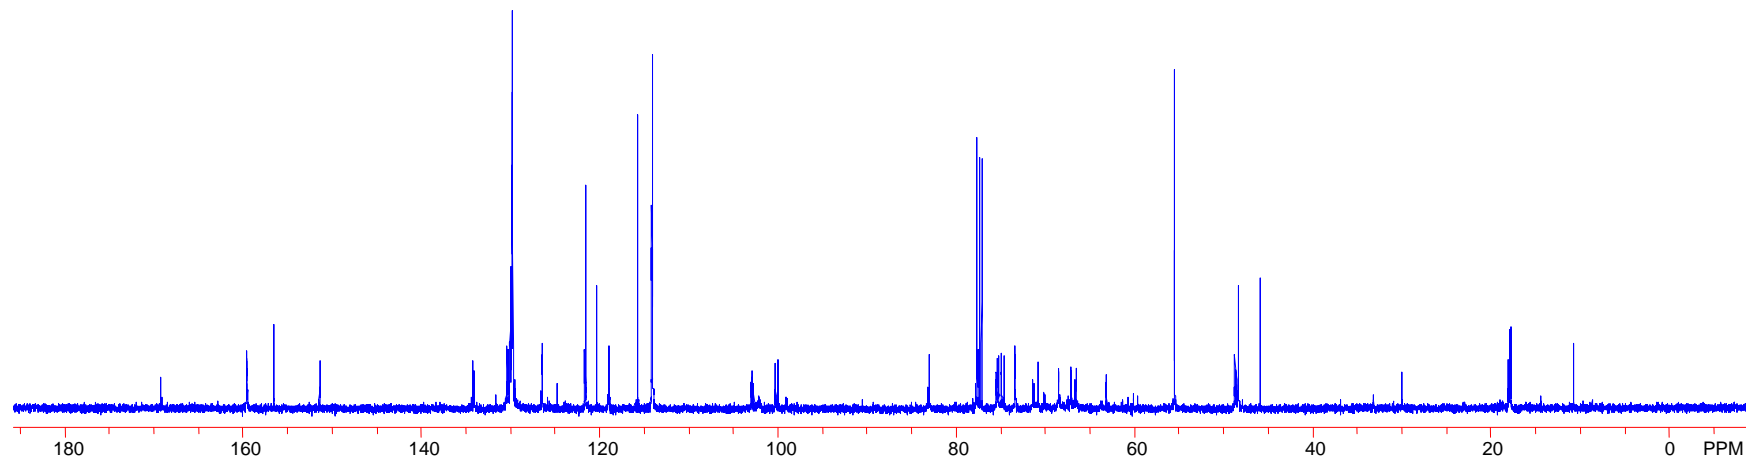

$^1\text{H-NMR}$  spectrum ( $\text{CD}_3\text{OD}$ , 400 MHz) 2-(Phenyloxycarbonylthioxy)but-3-enyl 2,2'-diazido-2,2'-dideoxy- $\beta$ -D-gentiobioside (**52**).

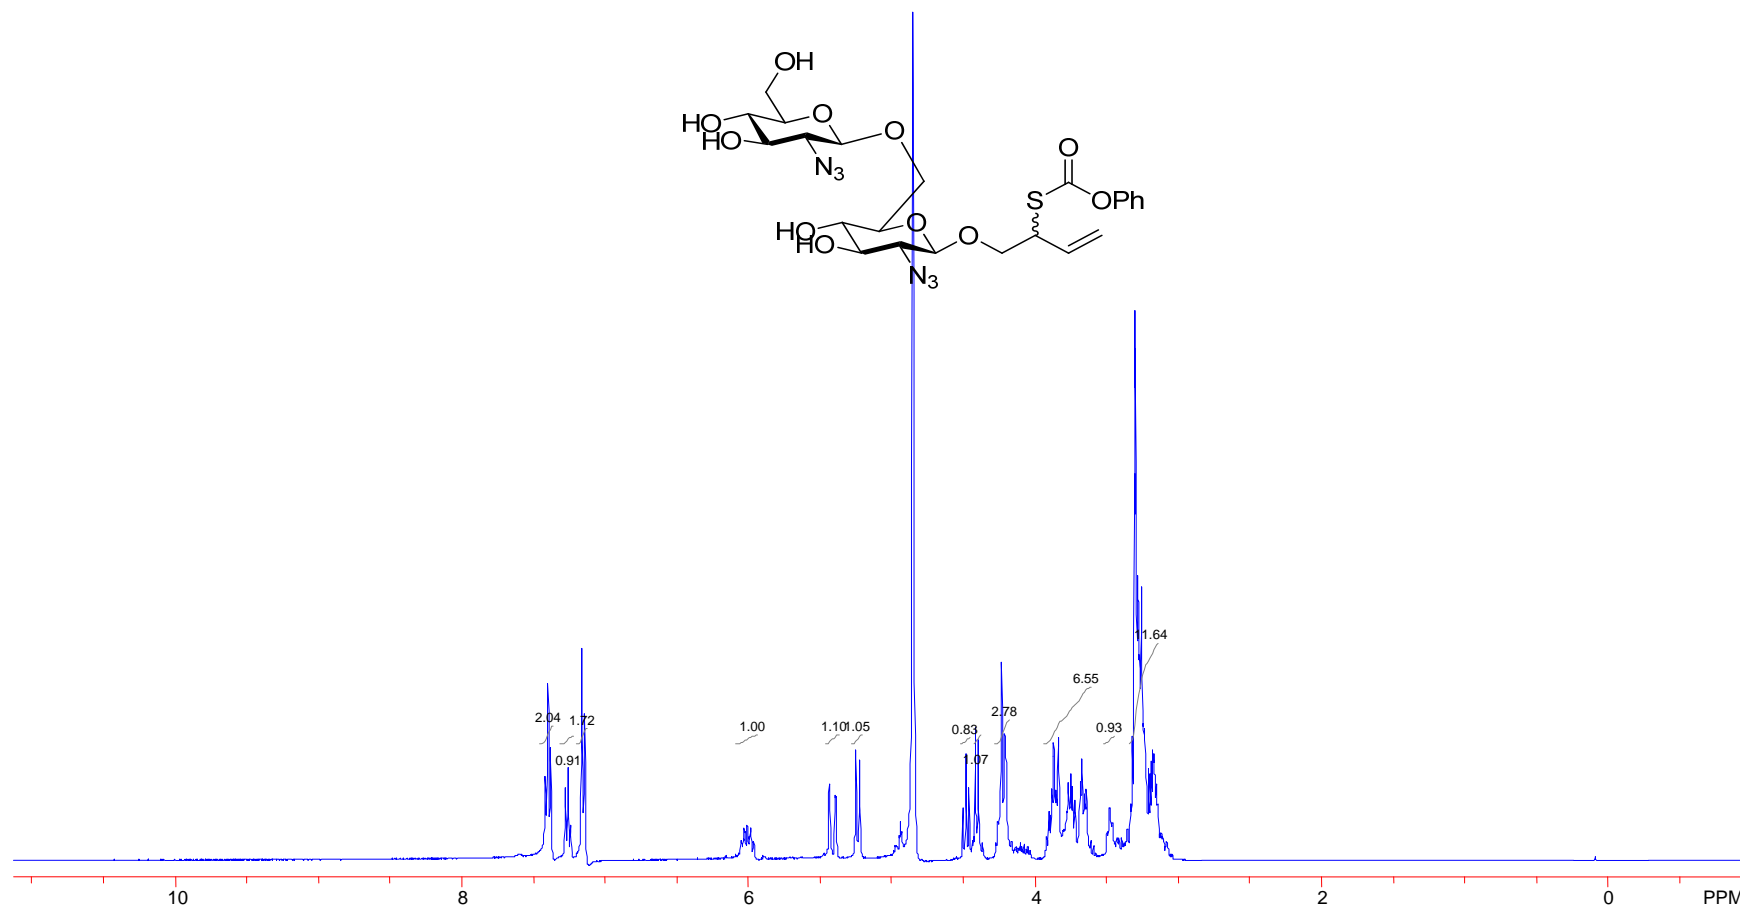

S-102

$^{13}\text{C}$ -NMR spectrum ( $\text{CD}_3\text{OD}$ , 100 MHz) 2-(Phenyloxycarbonylthioxy)but-3-enyl 2,2'-diazido-2,2'-dideoxy- $\beta$ -D-gentiobioside (**52**).

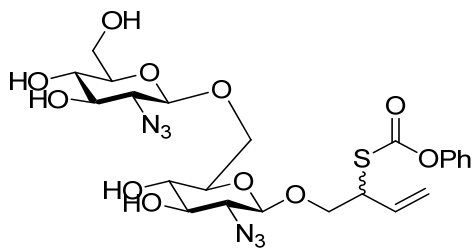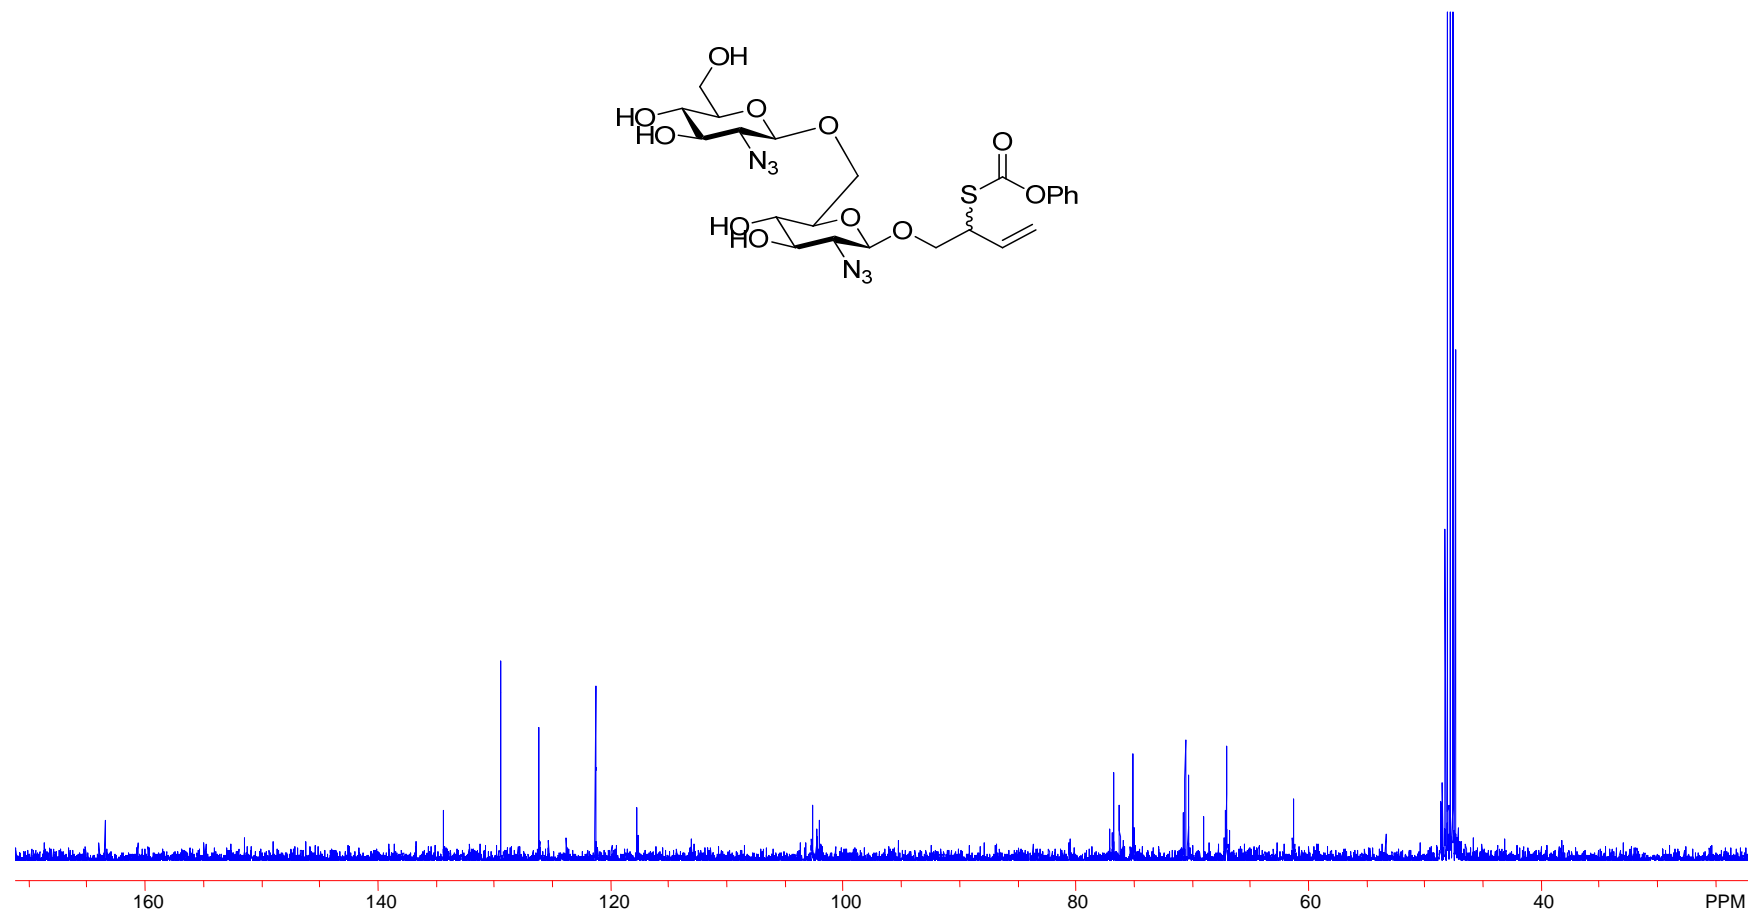

<sup>1</sup>H-NMR spectrum (CD<sub>3</sub>OD, 400 MHz) 2-(Pyridyldithio)but-3-enyl 2,2'-diazido-2,2'-dideoxy-β-D-gentiobioside (**53**).

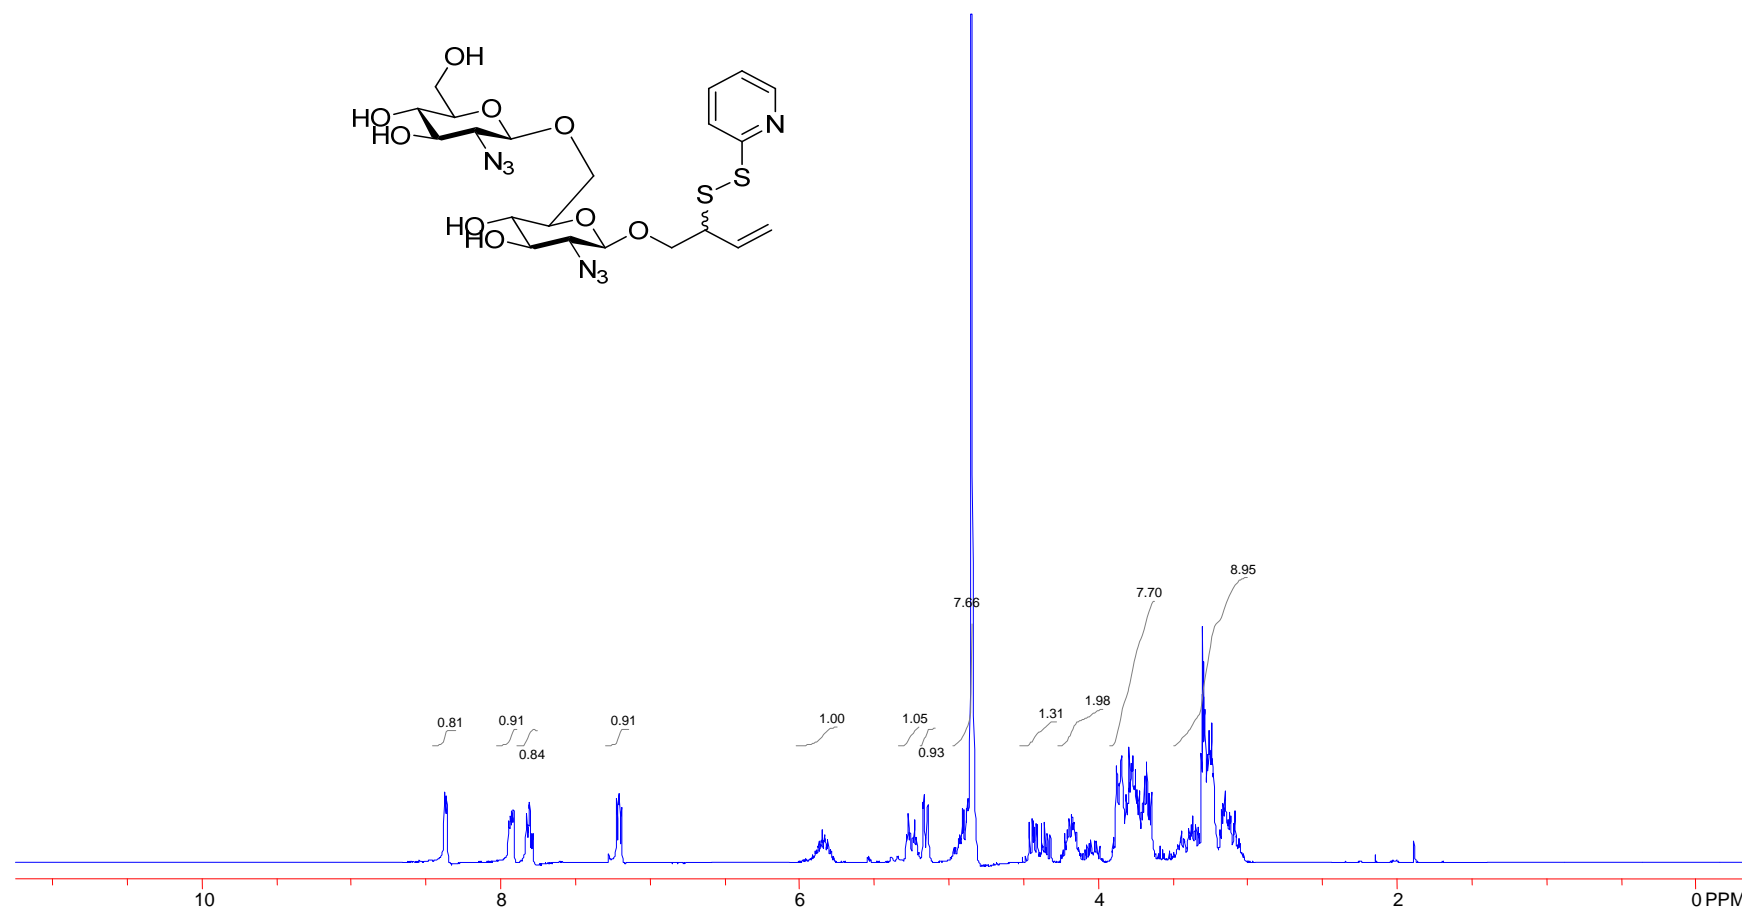



$^{13}\text{C}$ -NMR spectrum ( $\text{CD}_3\text{OD}$ , 100 MHz) 2-(Pyridyldithio)but-3-enyl 2,2'-diazido-2,2'-dideoxy- $\beta$ -D-gentiobioside (**53**).

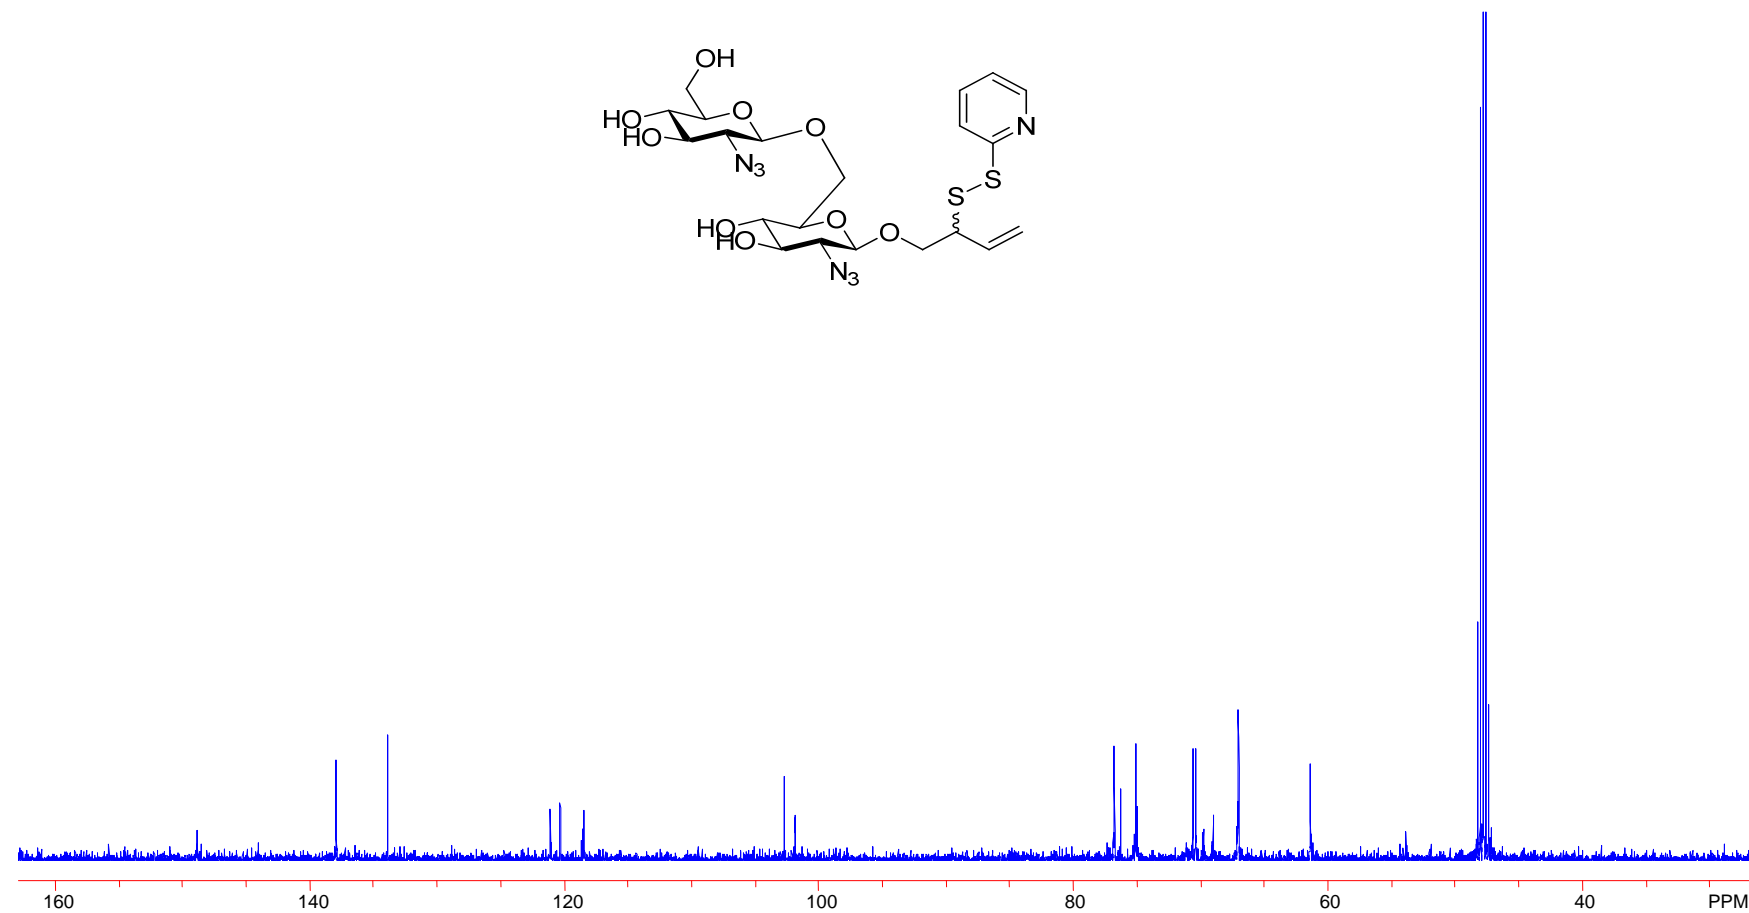

$^1\text{H-NMR}$  spectrum ( $\text{CD}_3\text{OD}$ , 400 MHz) Methyl 2,2'-diazido-2,2'-dideoxy-6'-acetylthio- $\beta$ -D-gentiobioside (**56**).

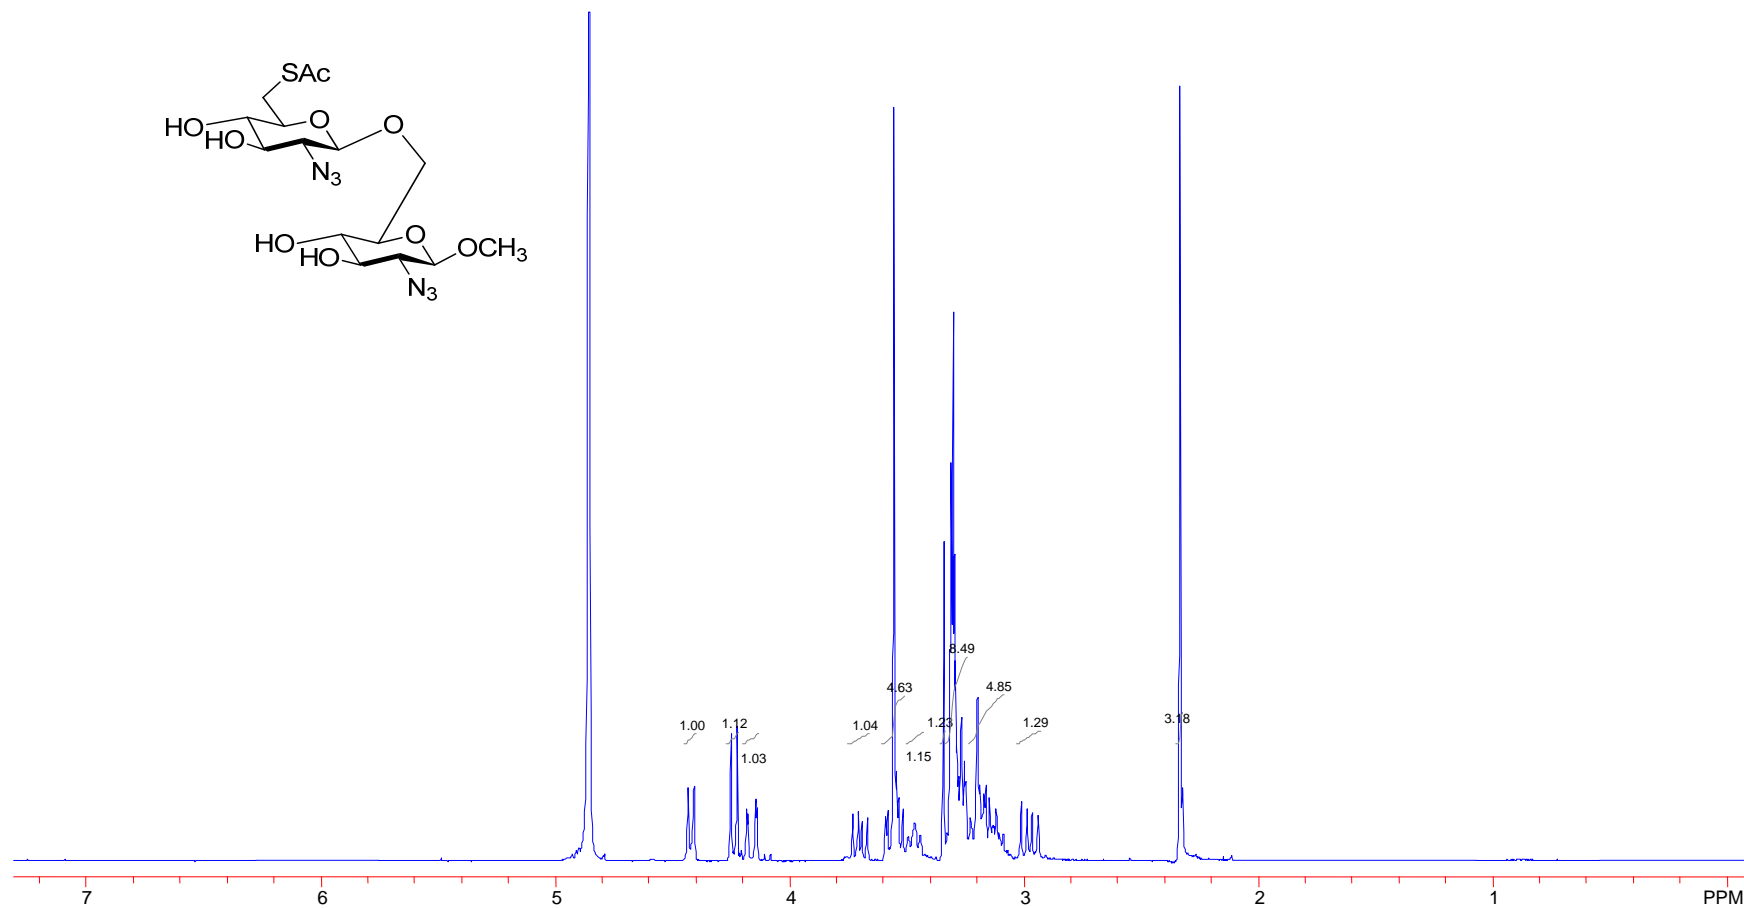

$^{13}\text{C}$ -NMR spectrum ( $\text{CD}_3\text{OD}$ , 100 MHz) Methyl 2,2'-diazido-2,2'-dideoxy-6'-acetylthio- $\beta$ -D-gentiobioside (**56**).

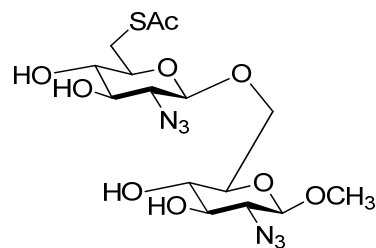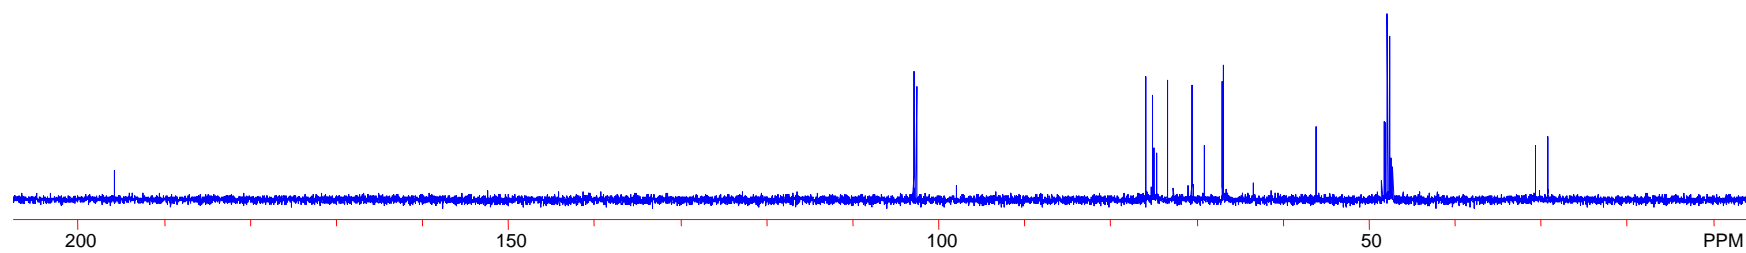

$^1\text{H-NMR}$  spectrum ( $\text{CDCl}_3$ , 400 MHz) Phenyl 3',4',6'-tri-*O*-acetyl-2,2'-dideoxy-3,4-*O*-(2,3-dimethoxybutan-2,3-diyl)-1-thio-2,2'-bis(2,2,2-trichloroethoxycarbonylamino)- $\beta$ -D-gentiobioside (**84**).

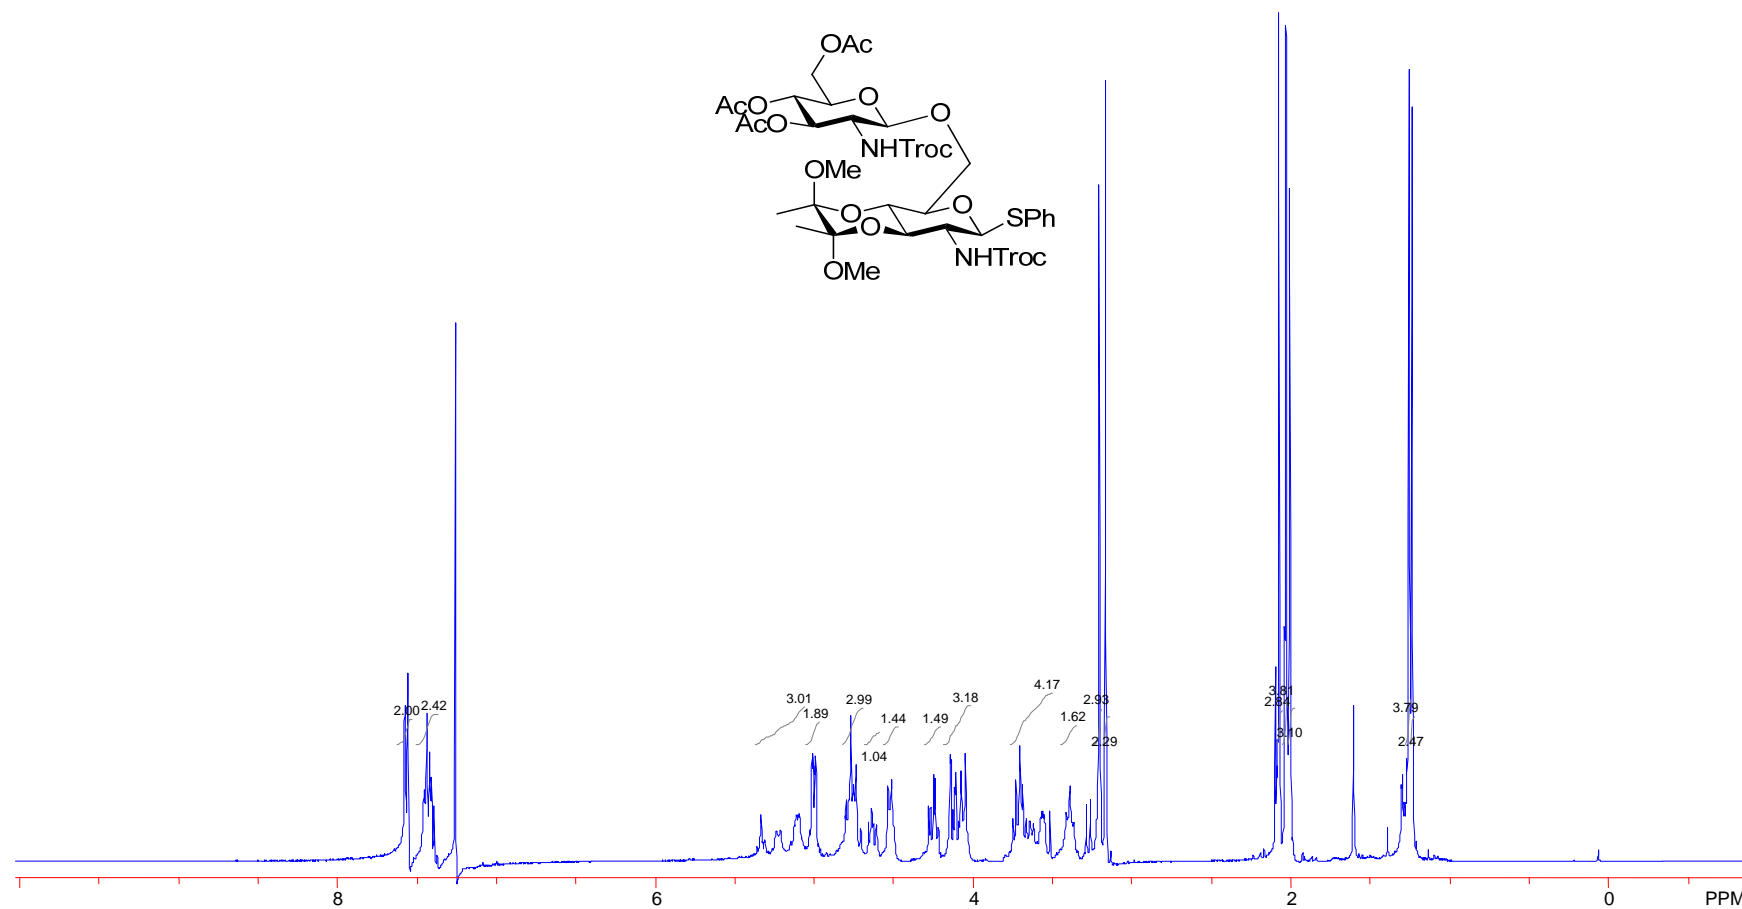

$^{13}\text{C}$ -NMR spectrum ( $\text{CDCl}_3$ , 100 MHz) Phenyl 3',4',6'-tri-*O*-acetyl-2,2'-dideoxy-3,4-*O*-(2,3-dimethoxybutan-2,3-diyl)-1-thio-2,2'-bis(2,2,2-trichloroethoxycarbonylamino)- $\beta$ -D-gentiobioside (**84**).

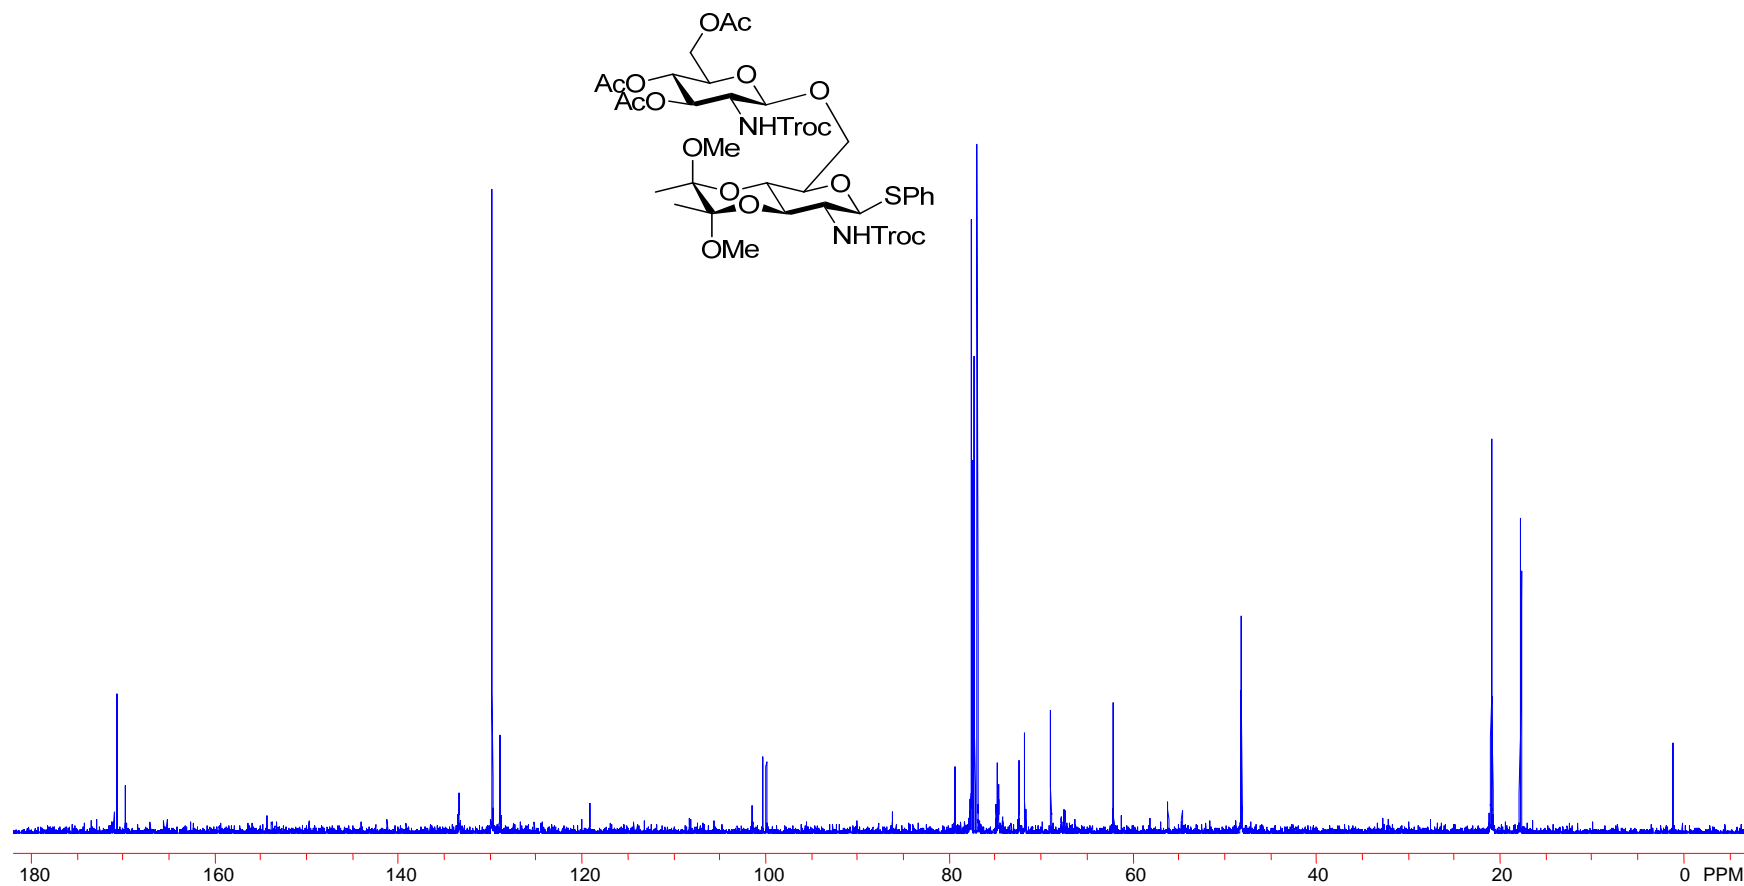

<sup>1</sup>H-NMR spectrum (CDCl<sub>3</sub>, 400 MHz) 2-(Phenyloxycarbonylthioxy)but-3-enyl 3',4',6'-tri-*O*-acetyl-2,2'-dideoxy-3,4-*O*-(2,3-dimethoxybutan-2,3-diyl)-2,2'-bis(2,2,2-trichloroethoxycarbonylamino)-β-D-gentiobioside (**85**)

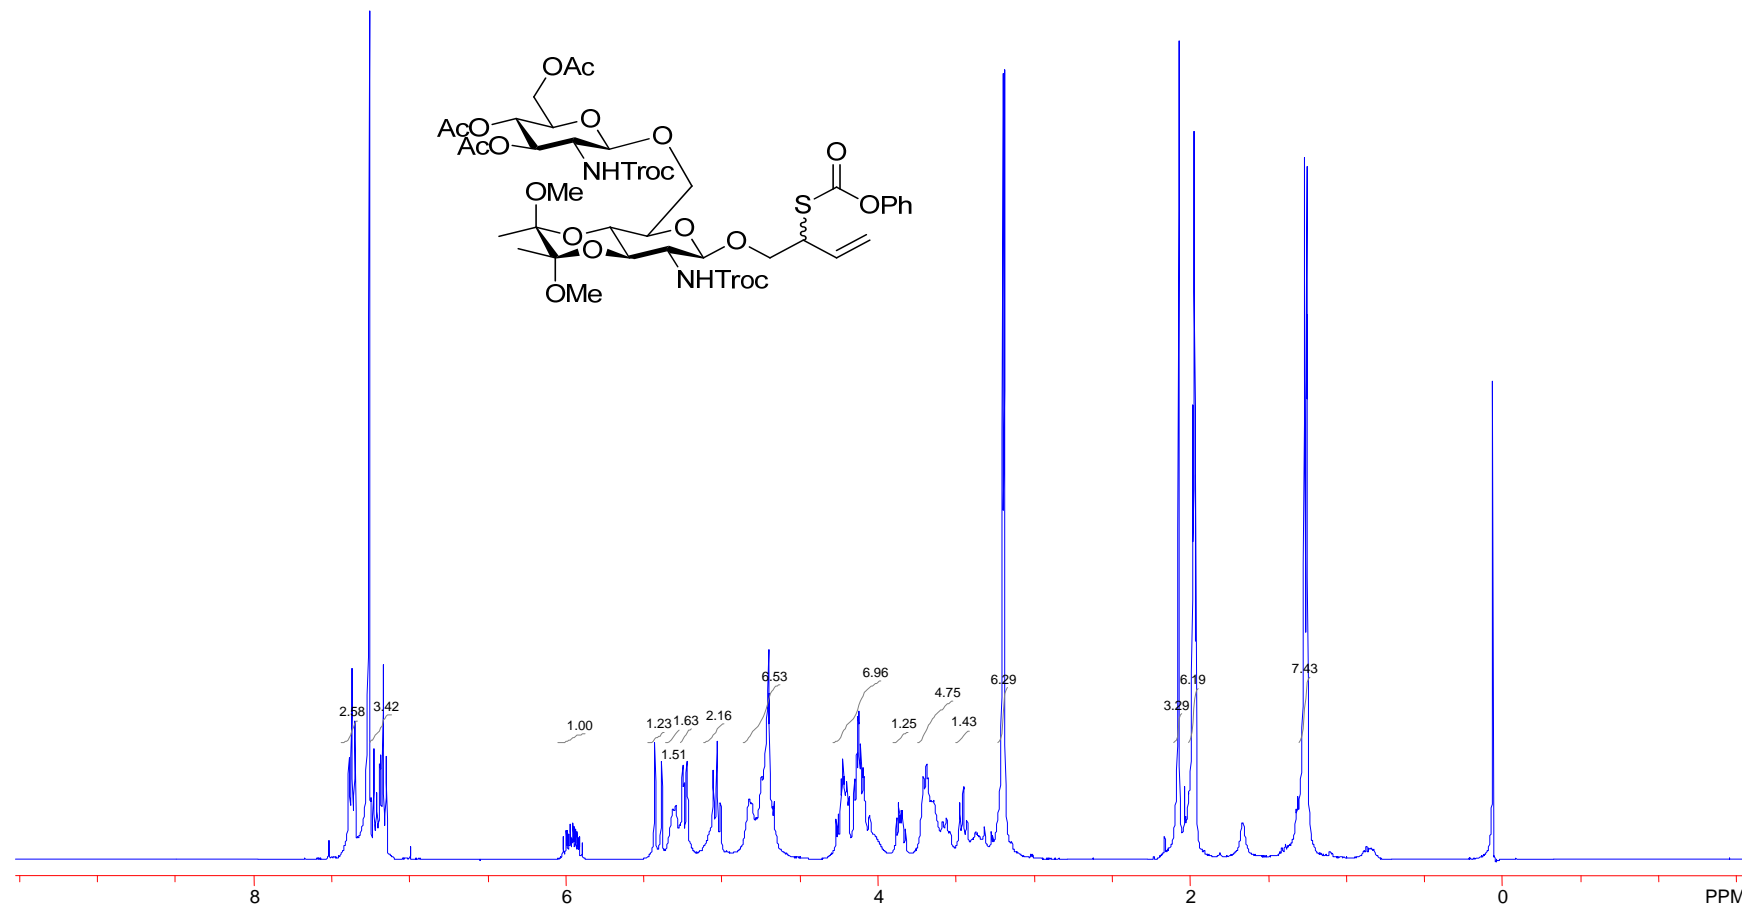

S-110

$^{13}\text{C}$ -NMR spectrum ( $\text{CDCl}_3$ , 100 MHz) 2-(Phenyloxycarbonylthioxy)but-3-enyl 3',4',6'-tri-*O*-acetyl-2,2'-dideoxy-3,4-*O*-(2,3-dimethoxybutan-2,3-diyl)-2,2'-bis(2,2,2-trichloroethoxycarbonylamino)- $\beta$ -D-gentiobioside (**85**)

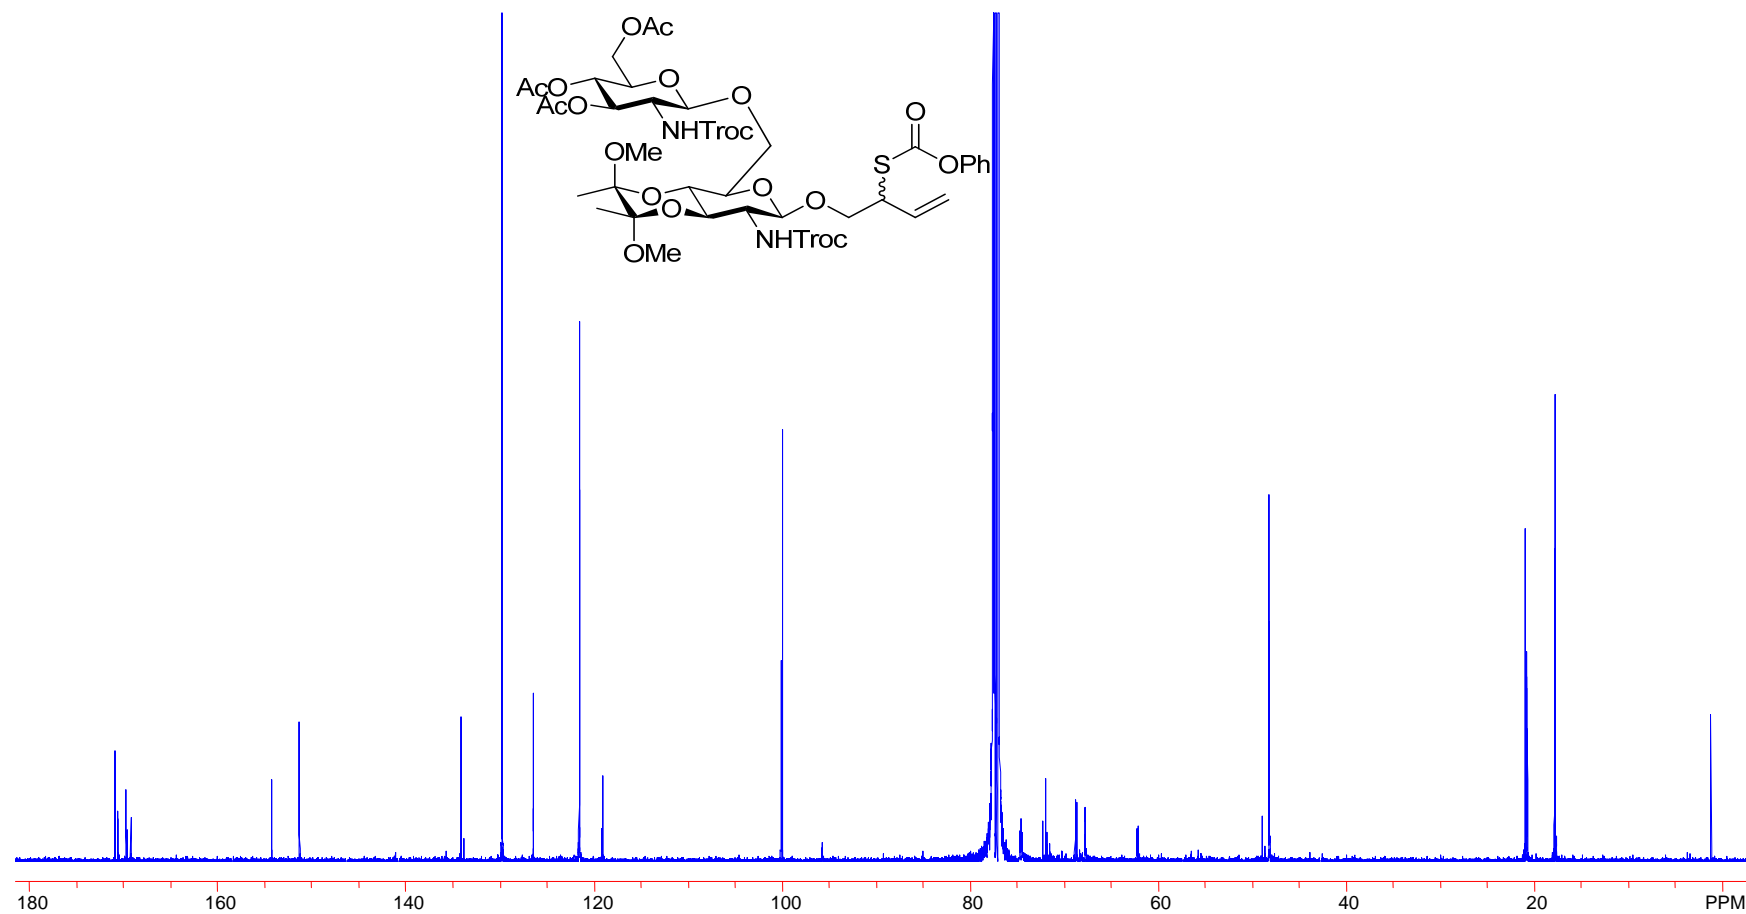

$^1\text{H-NMR}$  spectrum ( $\text{CDCl}_3$ , 400 MHz) 2-(Phenyloxycarbonylthioxy)but-3-enyl 3',4',6'-tri-*O*-acetyl-2,2'-dideoxy-2,2'-bis(2,2,2-trichloroethoxycarbonylamino)- $\beta$ -D-gentiobioside (**86**)

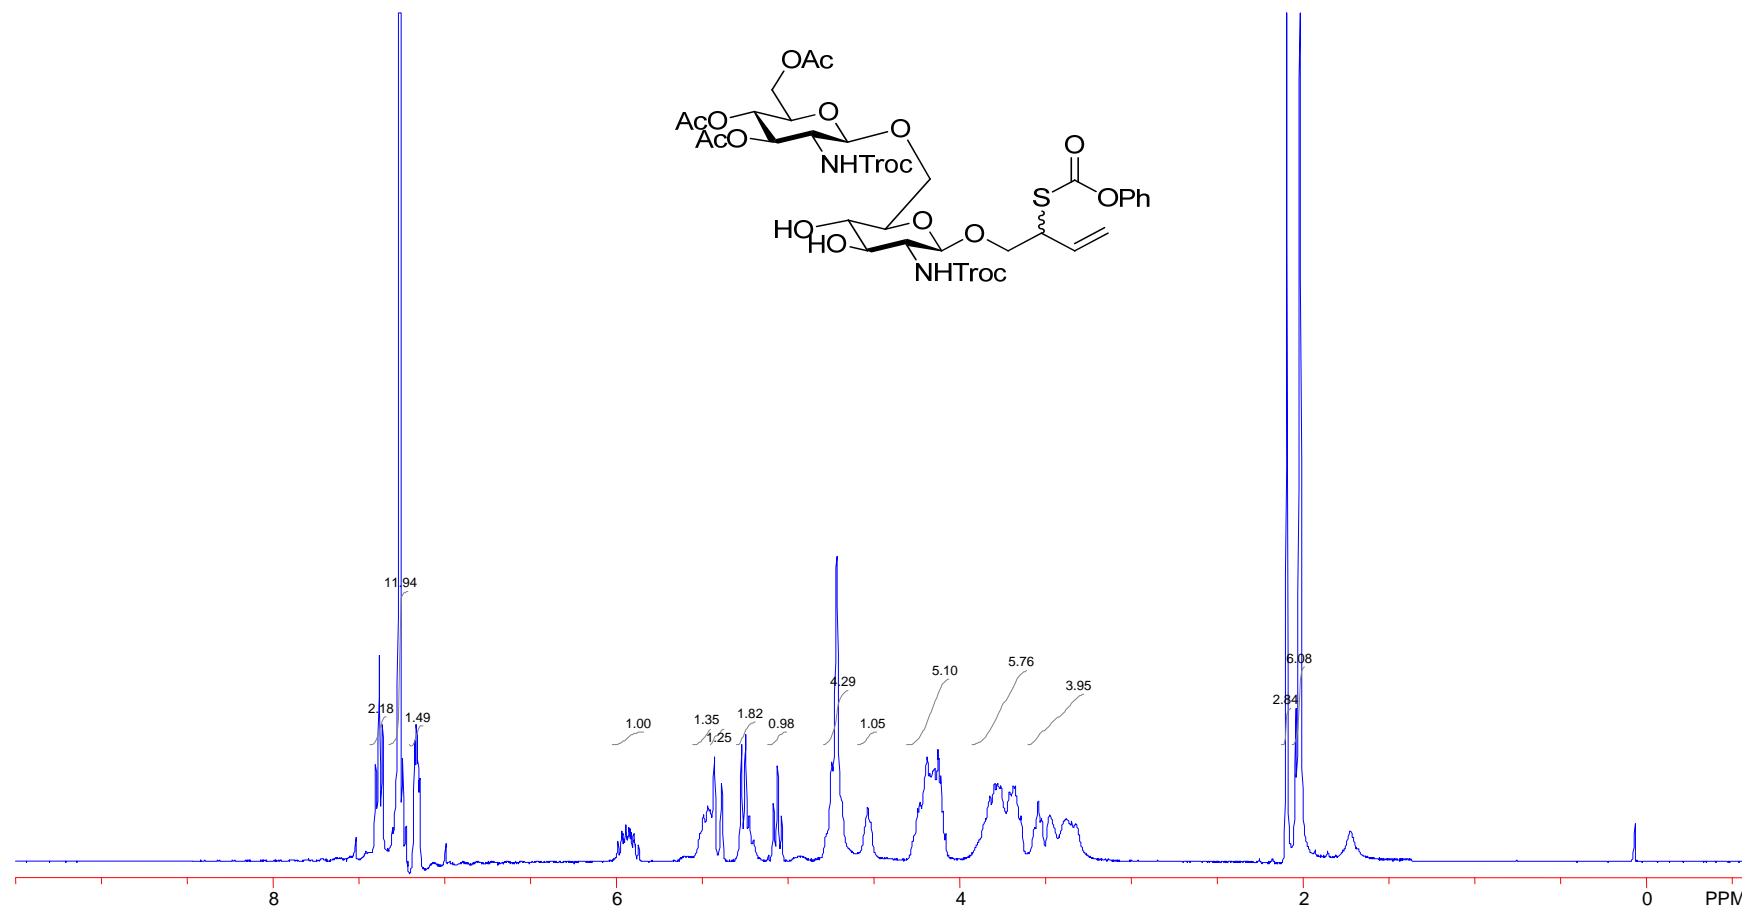

S-112



$^{13}\text{C}$ -NMR spectrum ( $\text{CDCl}_3$ , 125 MHz) 2-(Phenyloxycarbonylthioxy)but-3-enyl 3',4',6'-tri-*O*-acetyl-2,2'-dideoxy-2,2'-bis(2,2,2-trichloroethoxycarbonylamino)- $\beta$ -D-gentiobioside (**86**)

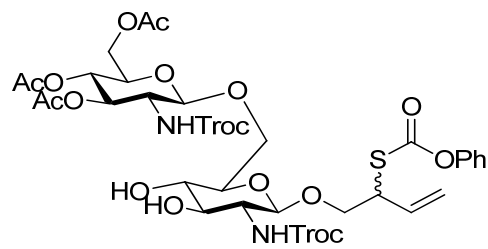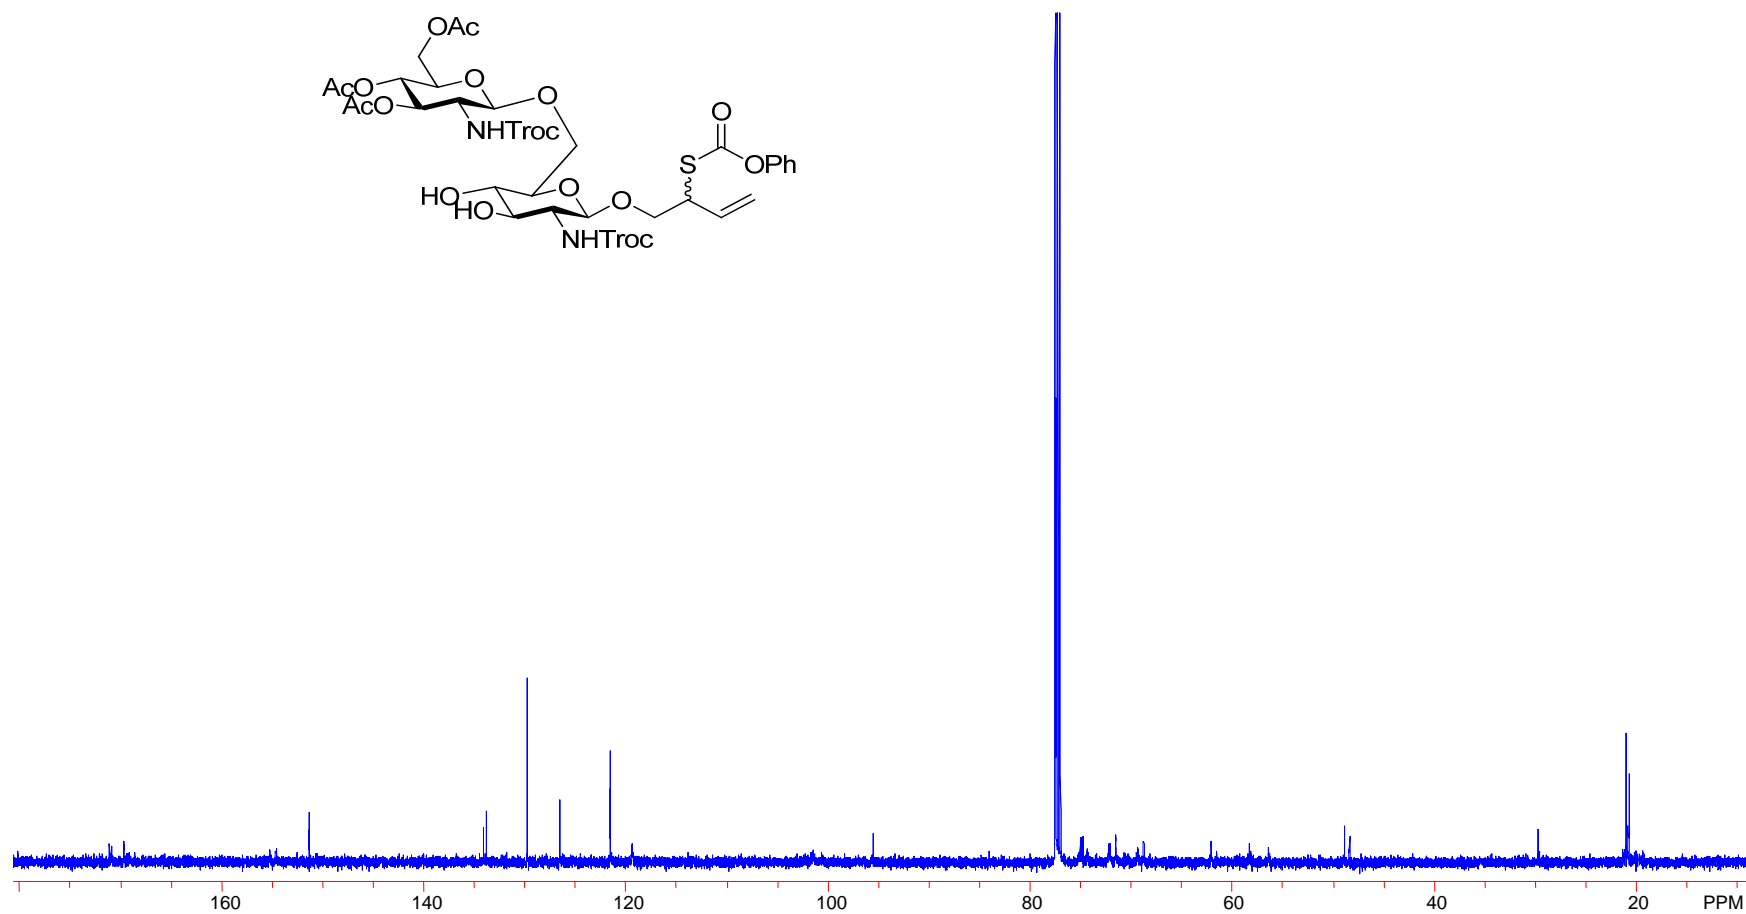

$^1\text{H-NMR}$  spectrum ( $\text{CD}_3\text{OD}$ , 400 MHz) 2-(2-Pyridyldithio)but-3-enyl 2,2'-dideoxy-2,2'-bis(2,2,2-trichloroethoxycarbonylamino)- $\beta$ -D-gentiobioside (**62**).

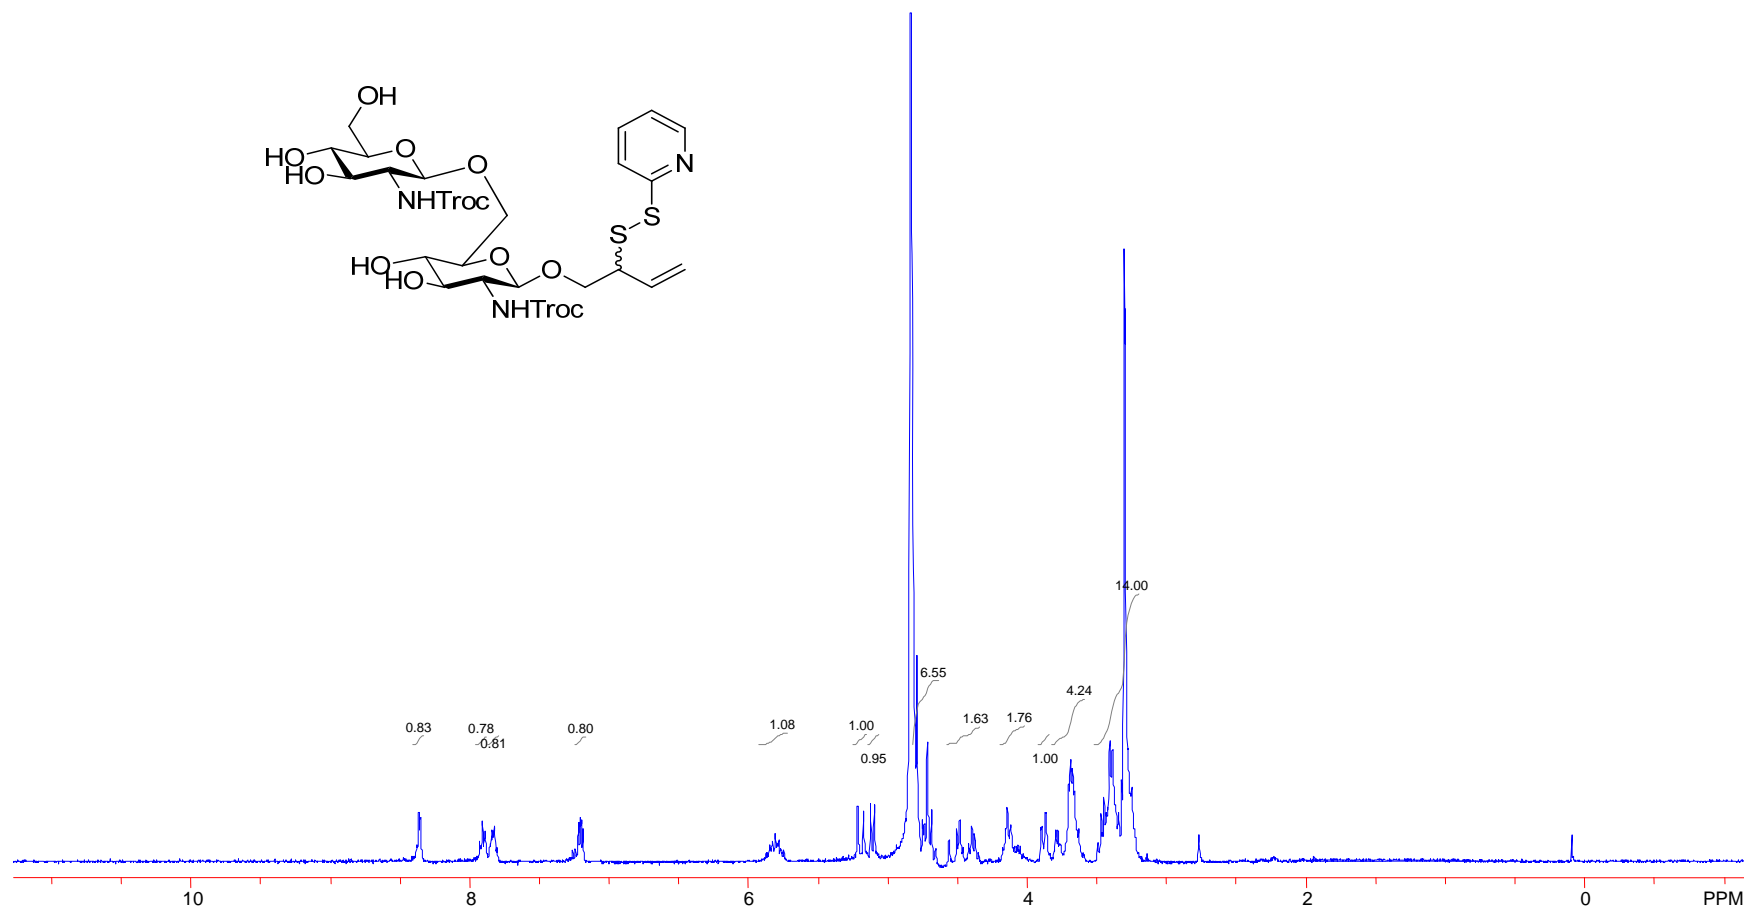

$^{13}\text{C}$ -NMR spectrum ( $\text{CD}_3\text{OD}$ , 100 MHz) 2-(2-Pyridyldithio)but-3-enyl 2,2'-dideoxy-2,2'-bis(2,2,2-trichloroethoxycarbonylamino)- $\beta$ -D-gentiobioside (**62**).

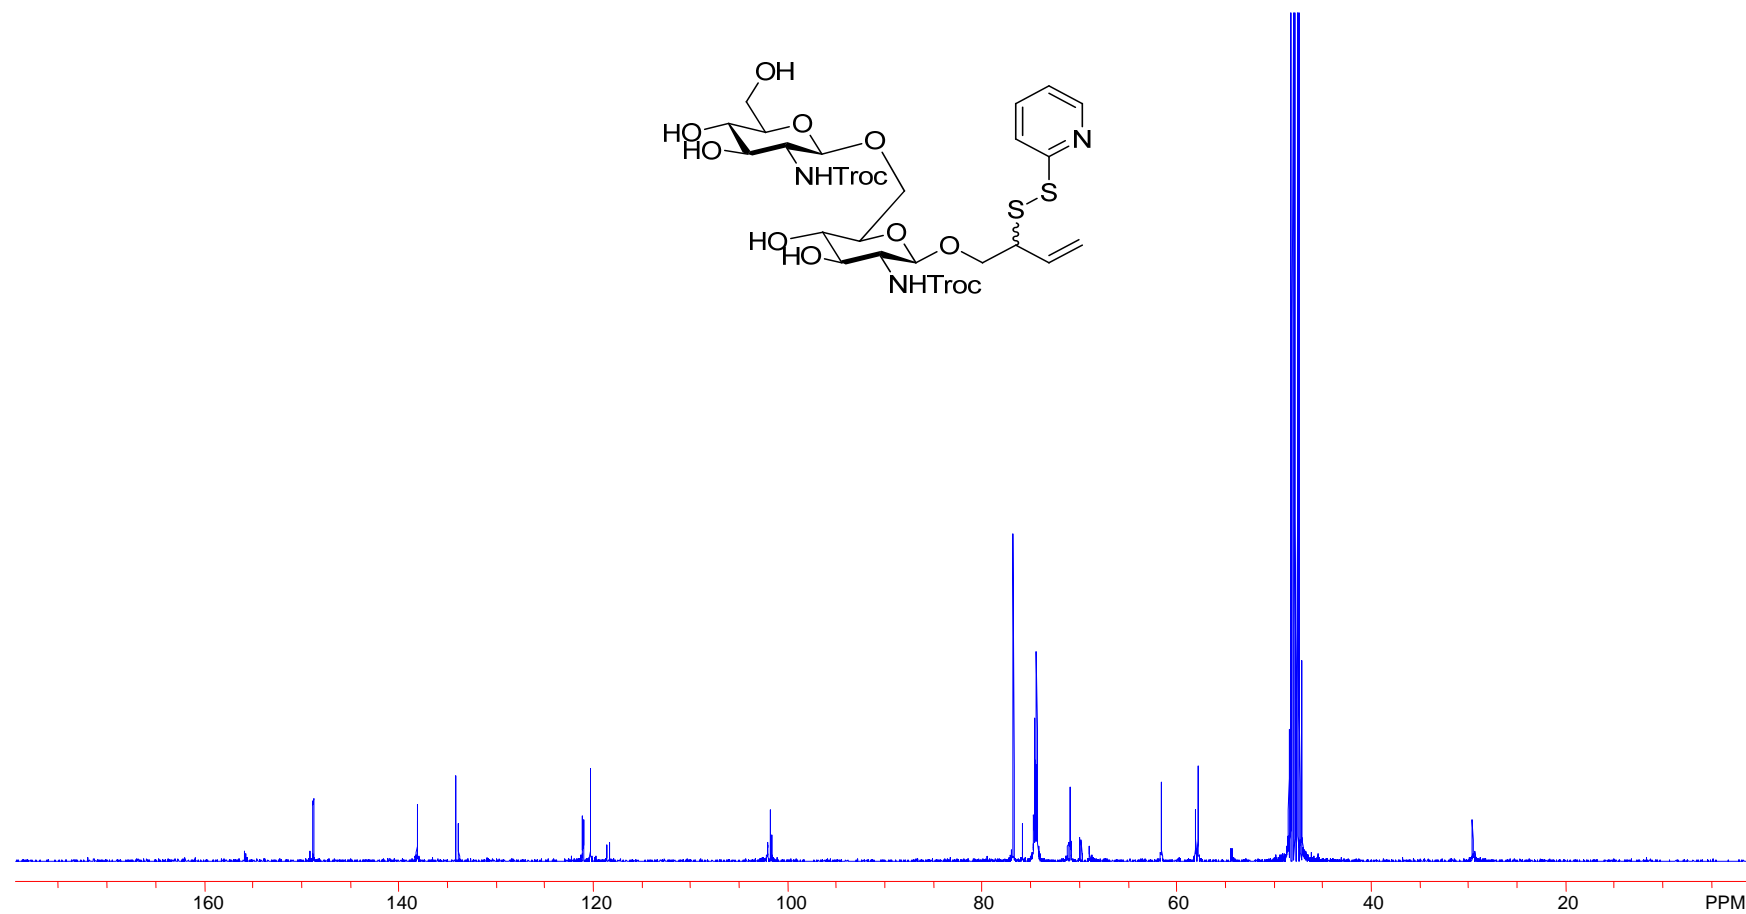

S-115

<sup>1</sup>H-NMR spectrum (CDCl<sub>3</sub>, 400 MHz) Methyl 2,2'-dideoxy-3,4;3',4'-di-*O*-(2,3-dimethoxybutan-2,3-diyl)-2,2'-bis(2,2,2-trichloroethoxycarbonylamino)-6'-*O*-*p*-toluenesulfonyl-β-D-gentiobioside (**59**)

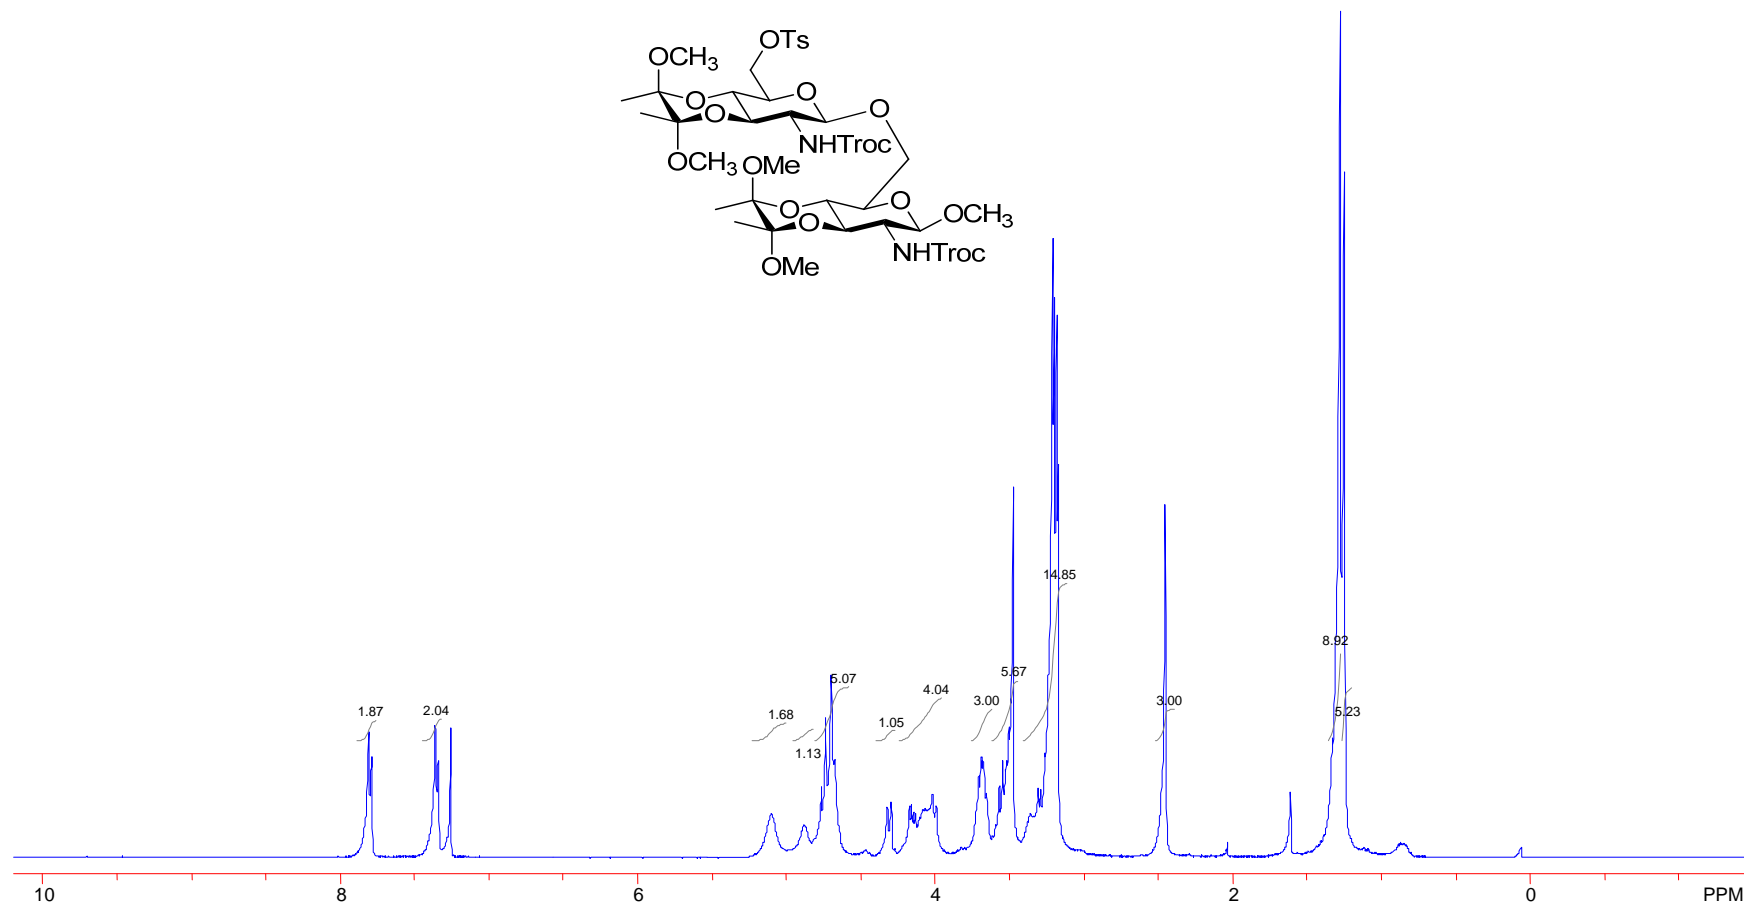

S-116

$^{13}\text{C}$ -NMR spectrum ( $\text{CDCl}_3$ , 100 MHz) Methyl 2,2'-dideoxy-3,4;3',4'-di-*O*-(2,3-dimethoxybutan-2,3-diyl)-2,2'-bis(2,2,2-trichloroethoxycarbonylamino)-6'-*O*-*p*-toluenesulfonyl- $\beta$ -D-gentiobioside (**59**)

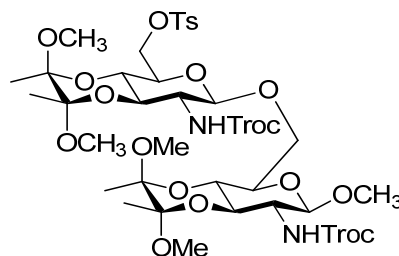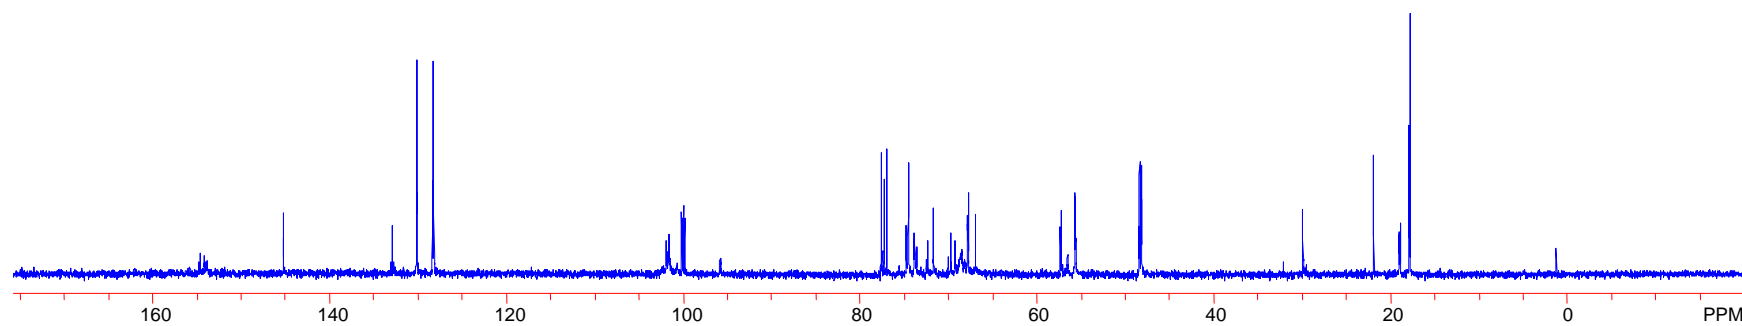

S-117

<sup>1</sup>H-NMR spectrum (CDCl<sub>3</sub>, 400 MHz) Methyl 6'-acetylthio-2,2'-dideoxy-3,4;3',4'-di-O-(2,3-dimethoxybutan-2,3-diyl)-2,2'-bis(2,2,2-trichloroethoxycarbonylamino)-β-D-gentiobioside (**60**).

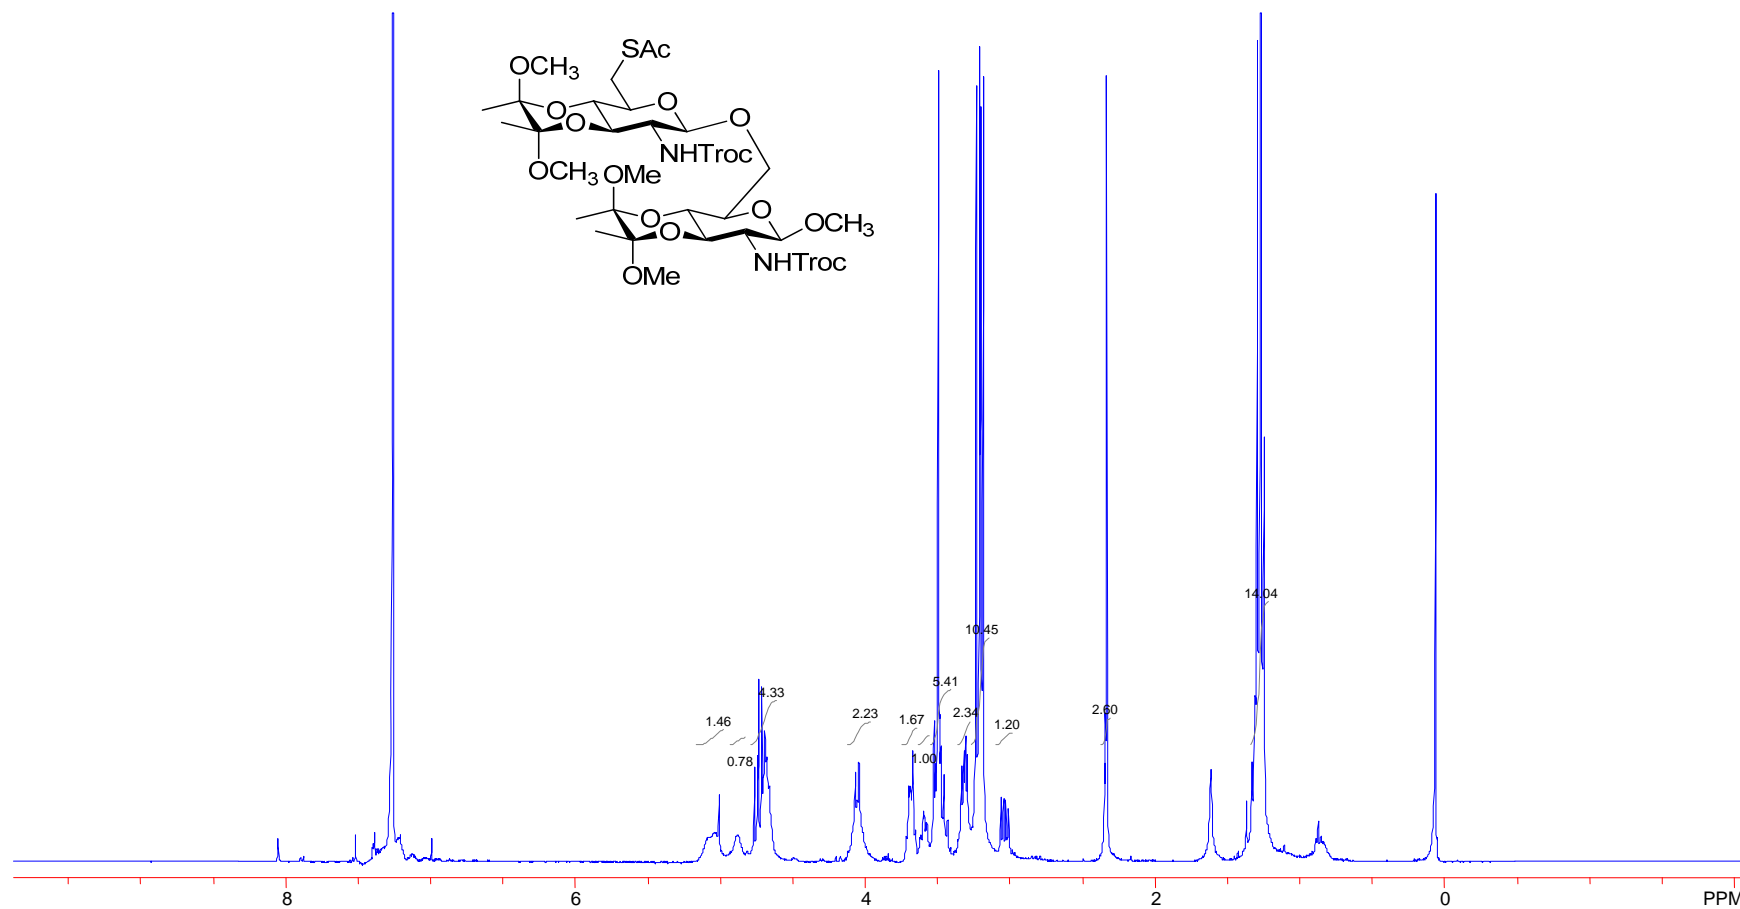

$^{13}\text{C}$ -NMR spectrum ( $\text{CDCl}_3$ , 100 MHz) Methyl 6'-acetylthio-2,2'-dideoxy-3,4;3',4'-di-*O*-(2,3-dimethoxybutan-2,3-diyl)-2,2'-bis(2,2,2-trichloroethoxycarbonylamino)- $\beta$ -D-gentiobioside (**60**).

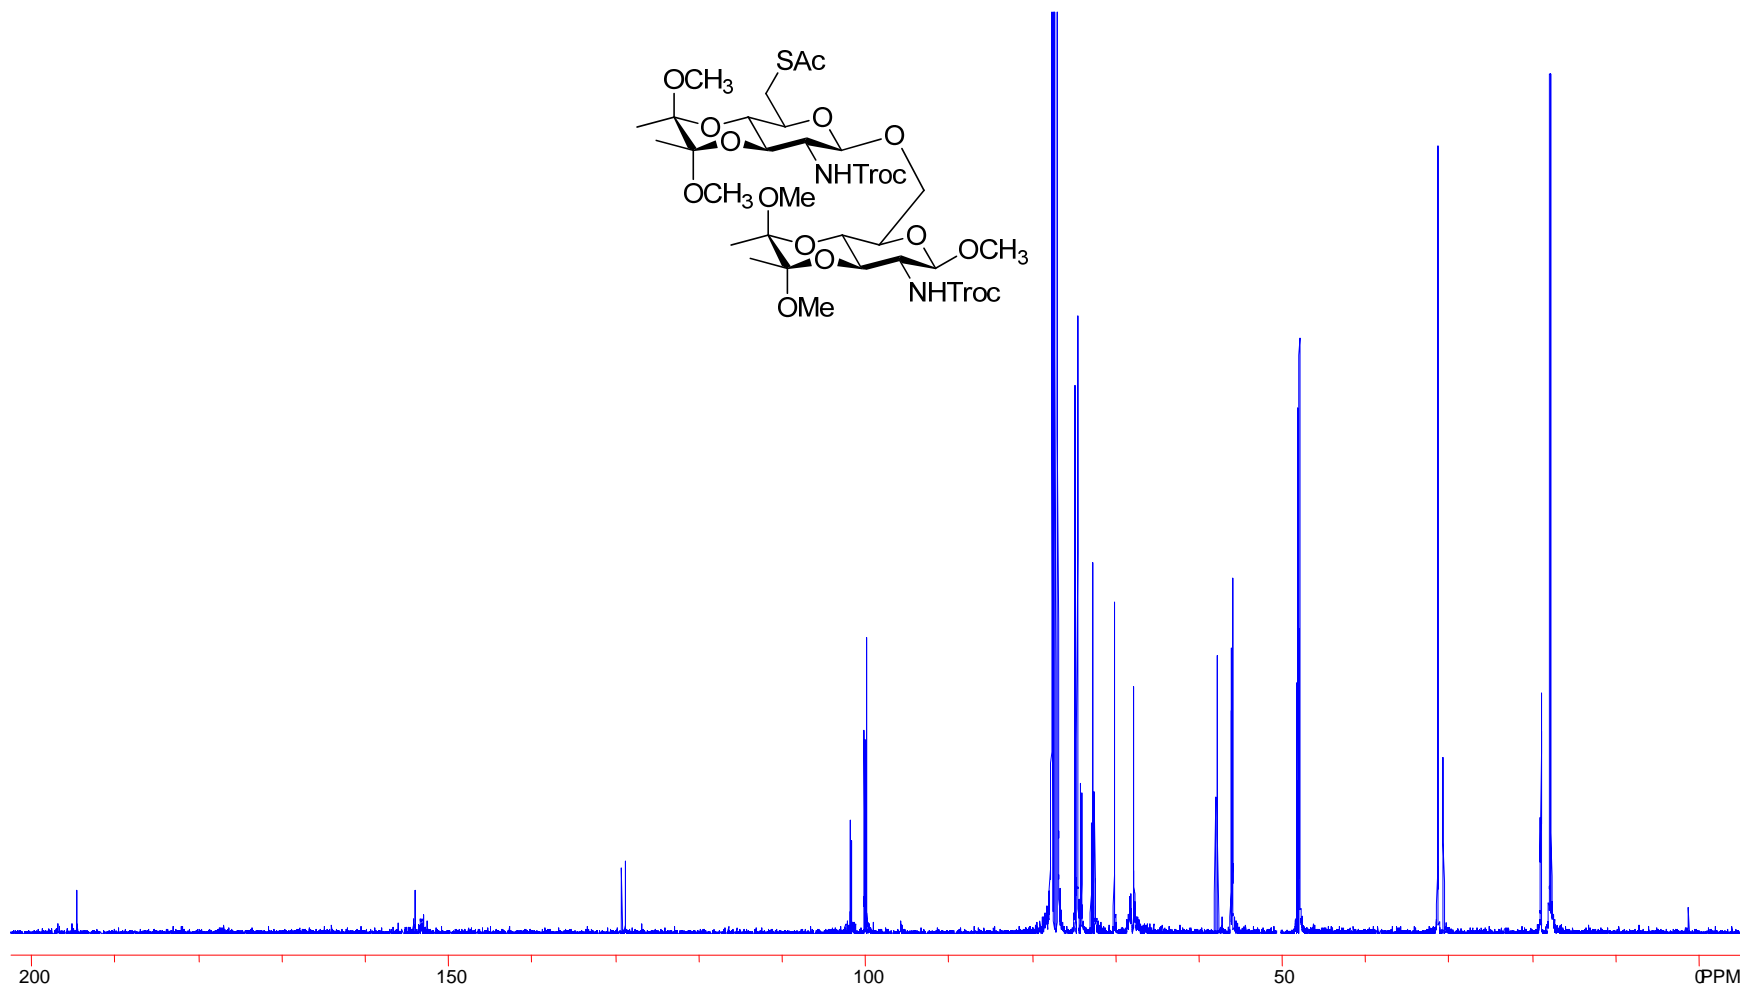

S-119

$^1\text{H-NMR}$  spectrum ( $\text{CD}_3\text{OD}$ , 400 MHz) Methyl 2,2'-dideoxy-2,2'-bis(2,2,2-trichloroethoxycarbonylamino)-6'-acetylthio- $\beta$ -D-gentiobioside (**61**).

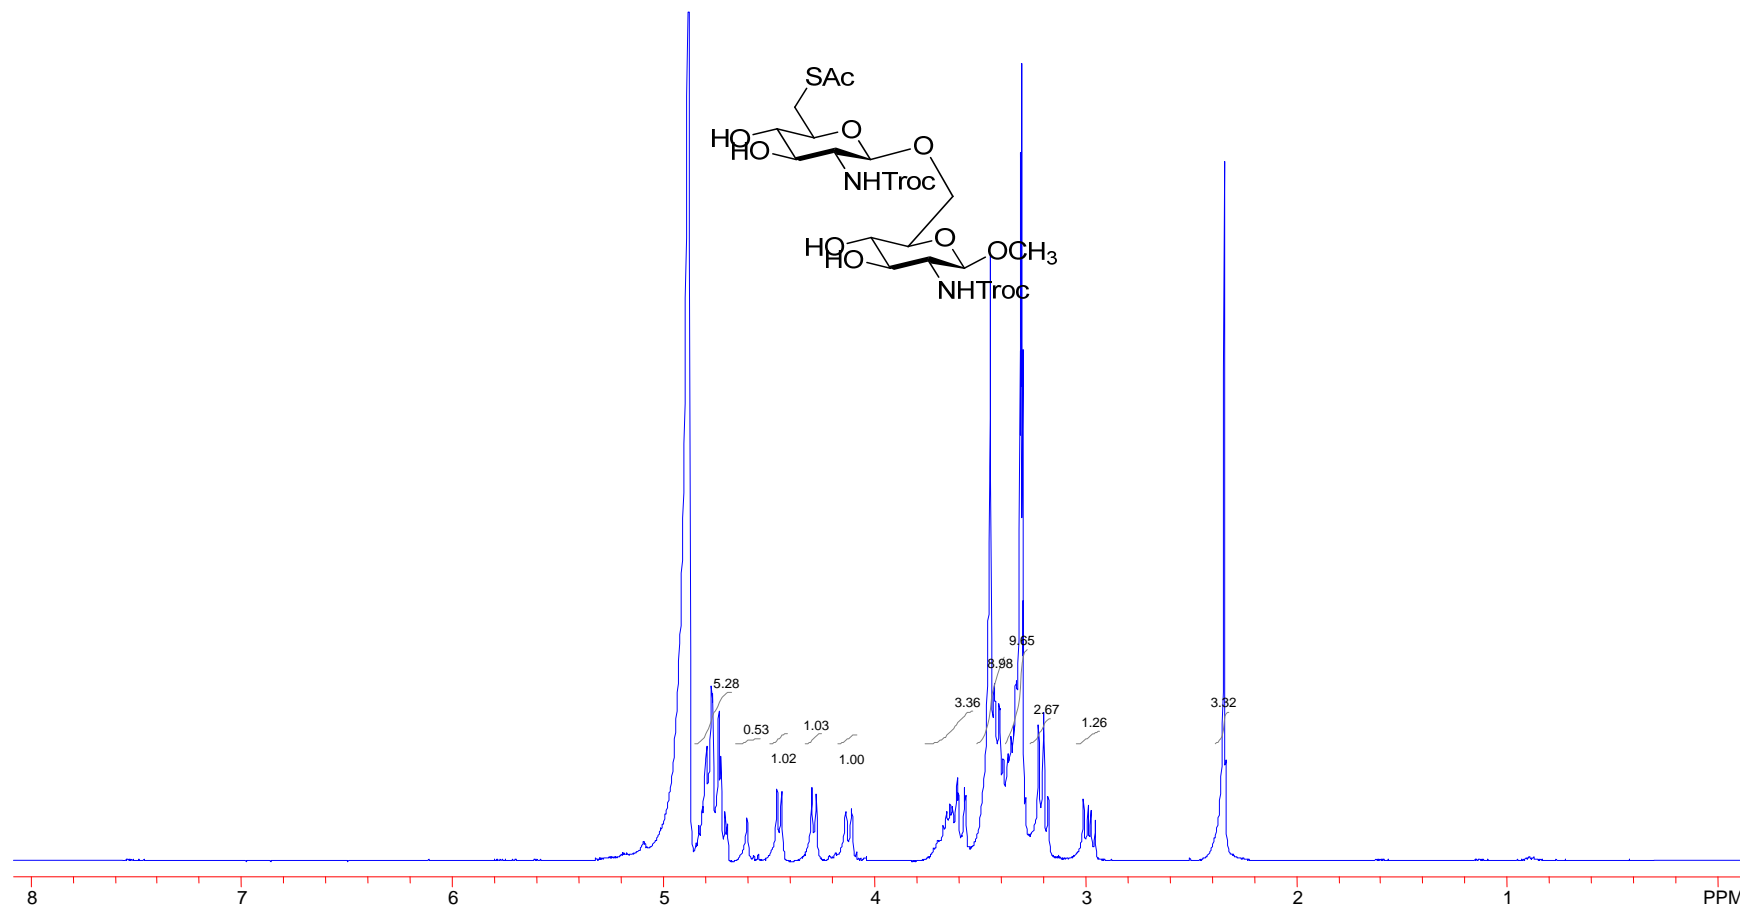



$^{13}\text{C}$ -NMR spectrum ( $\text{CD}_3\text{OD}$ , 100 MHz) Methyl 2,2'-dideoxy-2,2'-bis(2,2,2-trichloroethoxycarbonylamino)-6'-acetylthio- $\beta$ -D-gentiobioside (61).

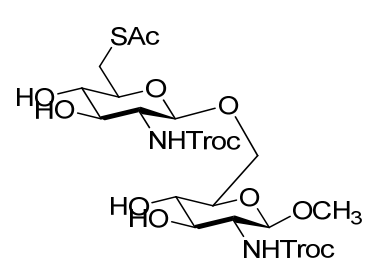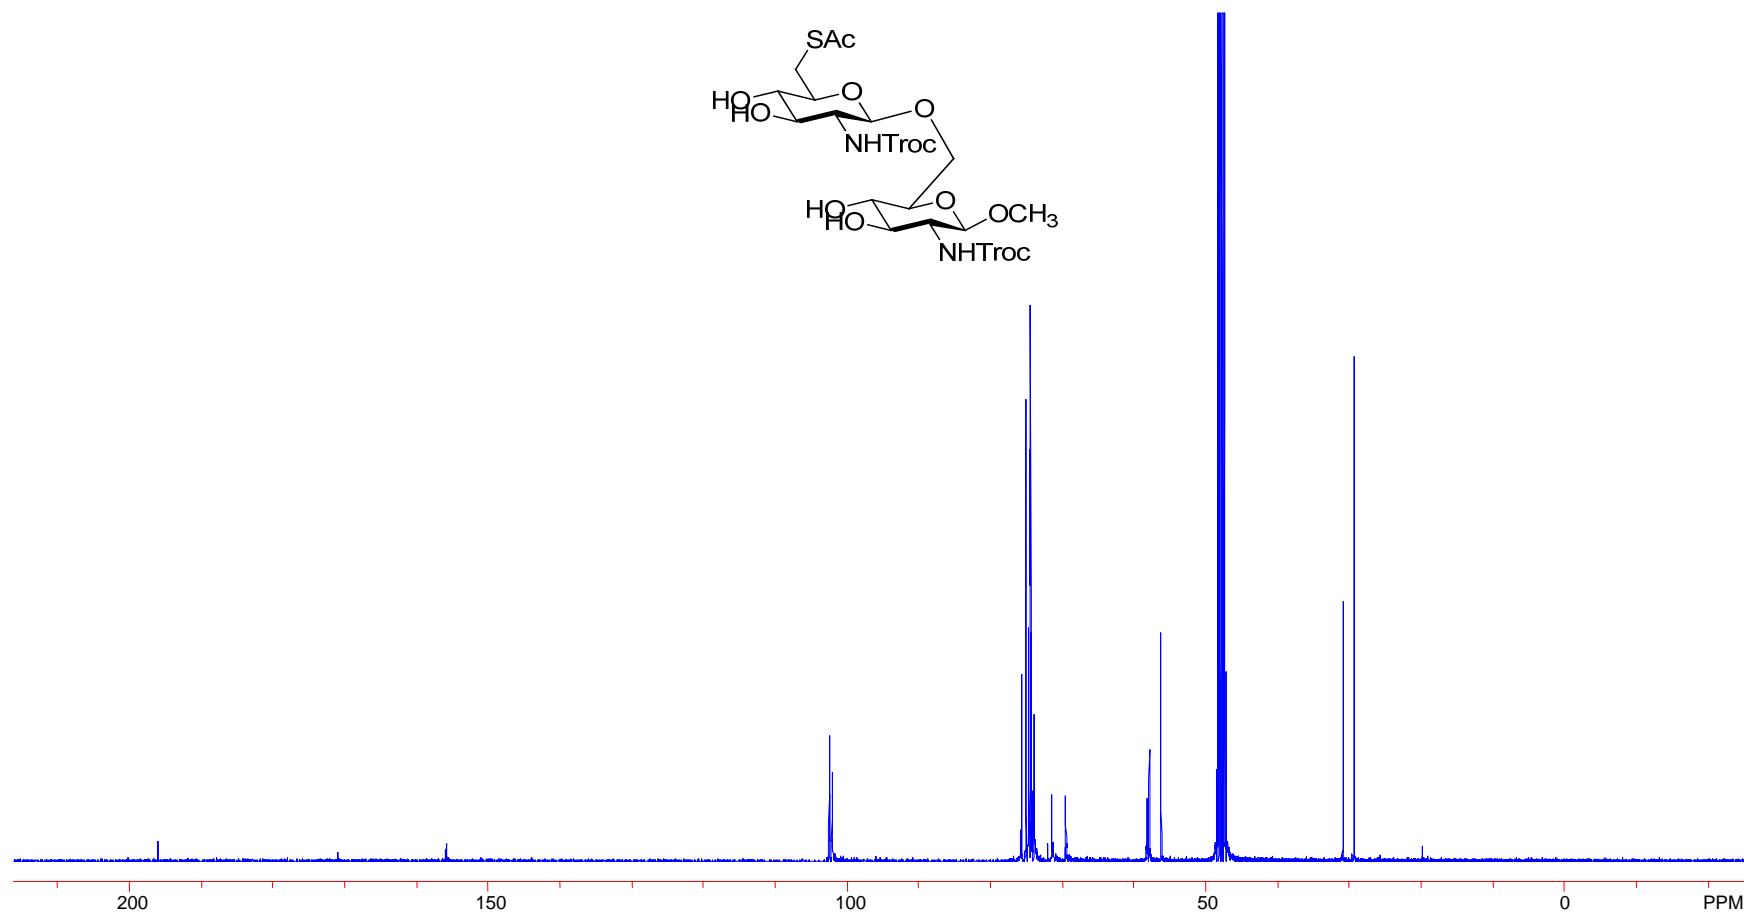

$^1\text{H-NMR}$  spectrum ( $\text{CDCl}_3$ , 500 MHz) 3-*O*-{2,4,6-Tri-*O*-acetyl-3-*O*-[4-(2-naphthylmethoxy)but-2-*Z*-enyl]- $\beta$ -D-glycopyranosyl}-1,2:5,6-di-*O*-isopropylidene- $\alpha$ -D-glucofuranose (**87**).

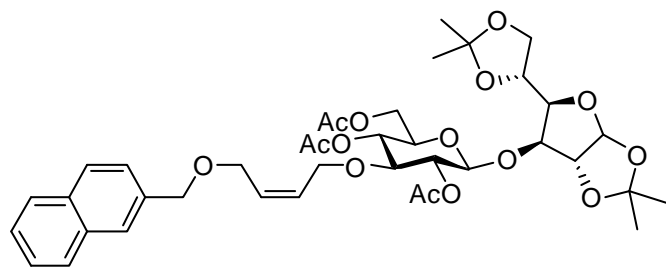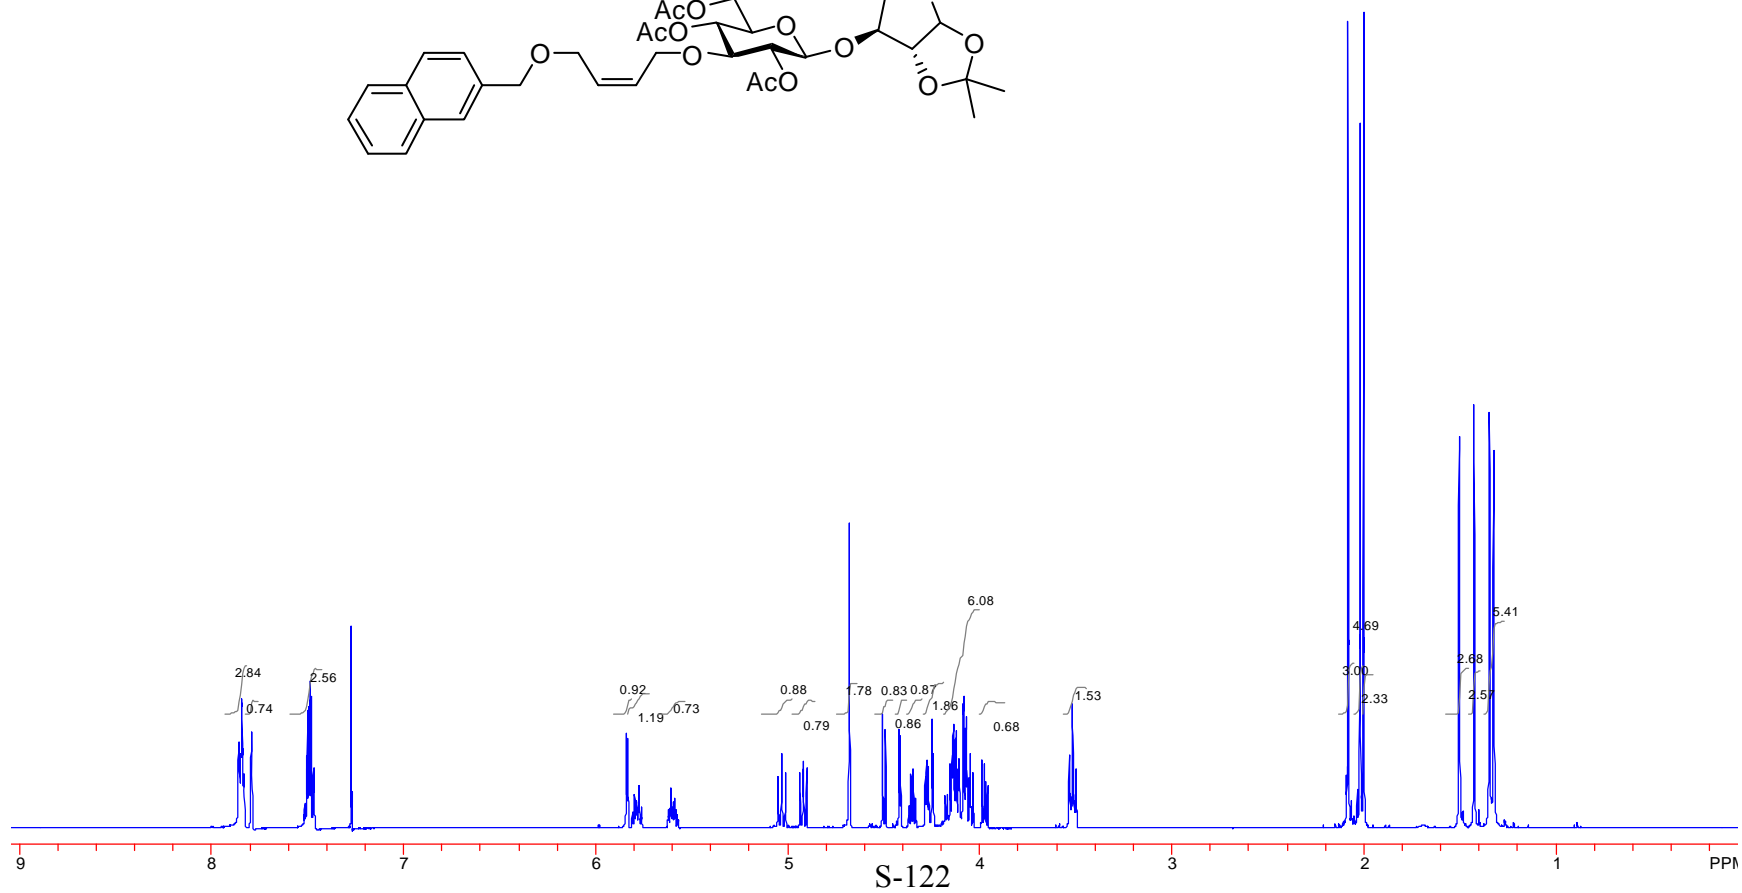

$^{13}\text{C}$ -NMR spectrum ( $\text{CDCl}_3$ , 125 MHz) 3-*O*-{2,4,6-Tri-*O*-acetyl-3-*O*-[4-(2-naphthylmethoxy)but-2-*Z*-enyl]- $\beta$ -D-glycopyranosyl}-1,2:5,6-di-*O*-isopropylidene- $\alpha$ -D-glucofuranose (**87**).

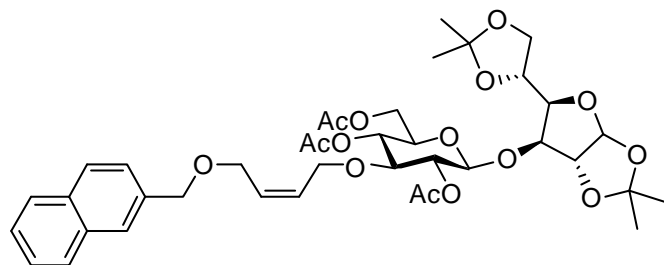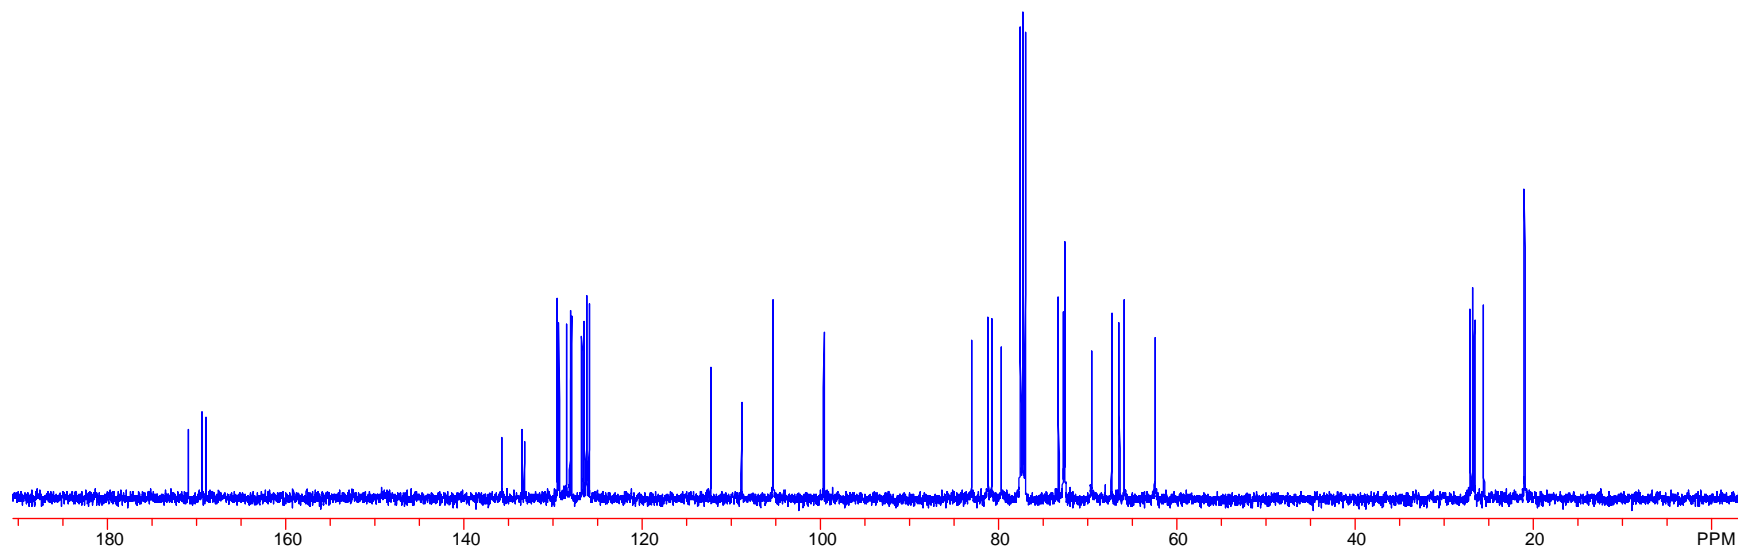

$^1\text{H-NMR}$  spectrum ( $\text{CDCl}_3$ , 500 MHz) 2,2',4,4',6,6'-Hexa-*O*-acetyl-3'-*O*-[4-(2-naphthylmethoxy)but-2-*Z*-enyl]- $\alpha$ -D-lamaribiosyl trichloroacetimidate (**89**).

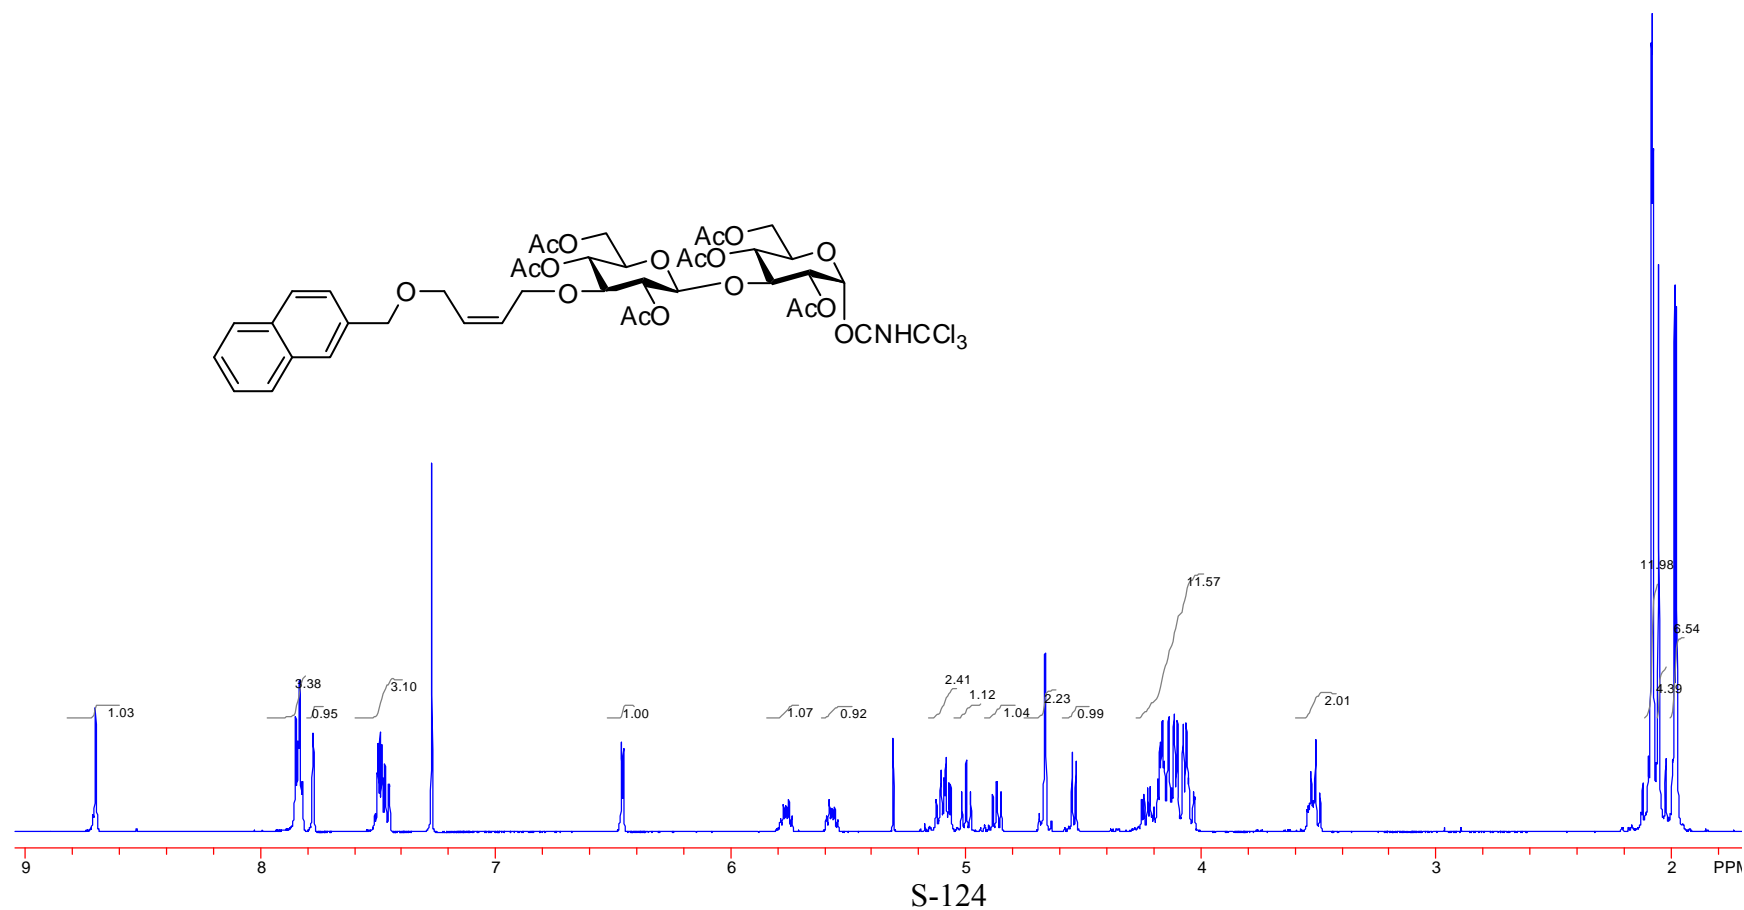

$^{13}\text{C}$ -NMR spectrum ( $\text{CDCl}_3$ , 125 MHz) 2,2',4,4',6,6'-Hexa-*O*-acetyl-3'-*O*-[4-(2-naphthylmethoxy)but-2-*Z*-enyl]- $\alpha$ -D-laminaribiosyl trichloroacetimidate (**89**).

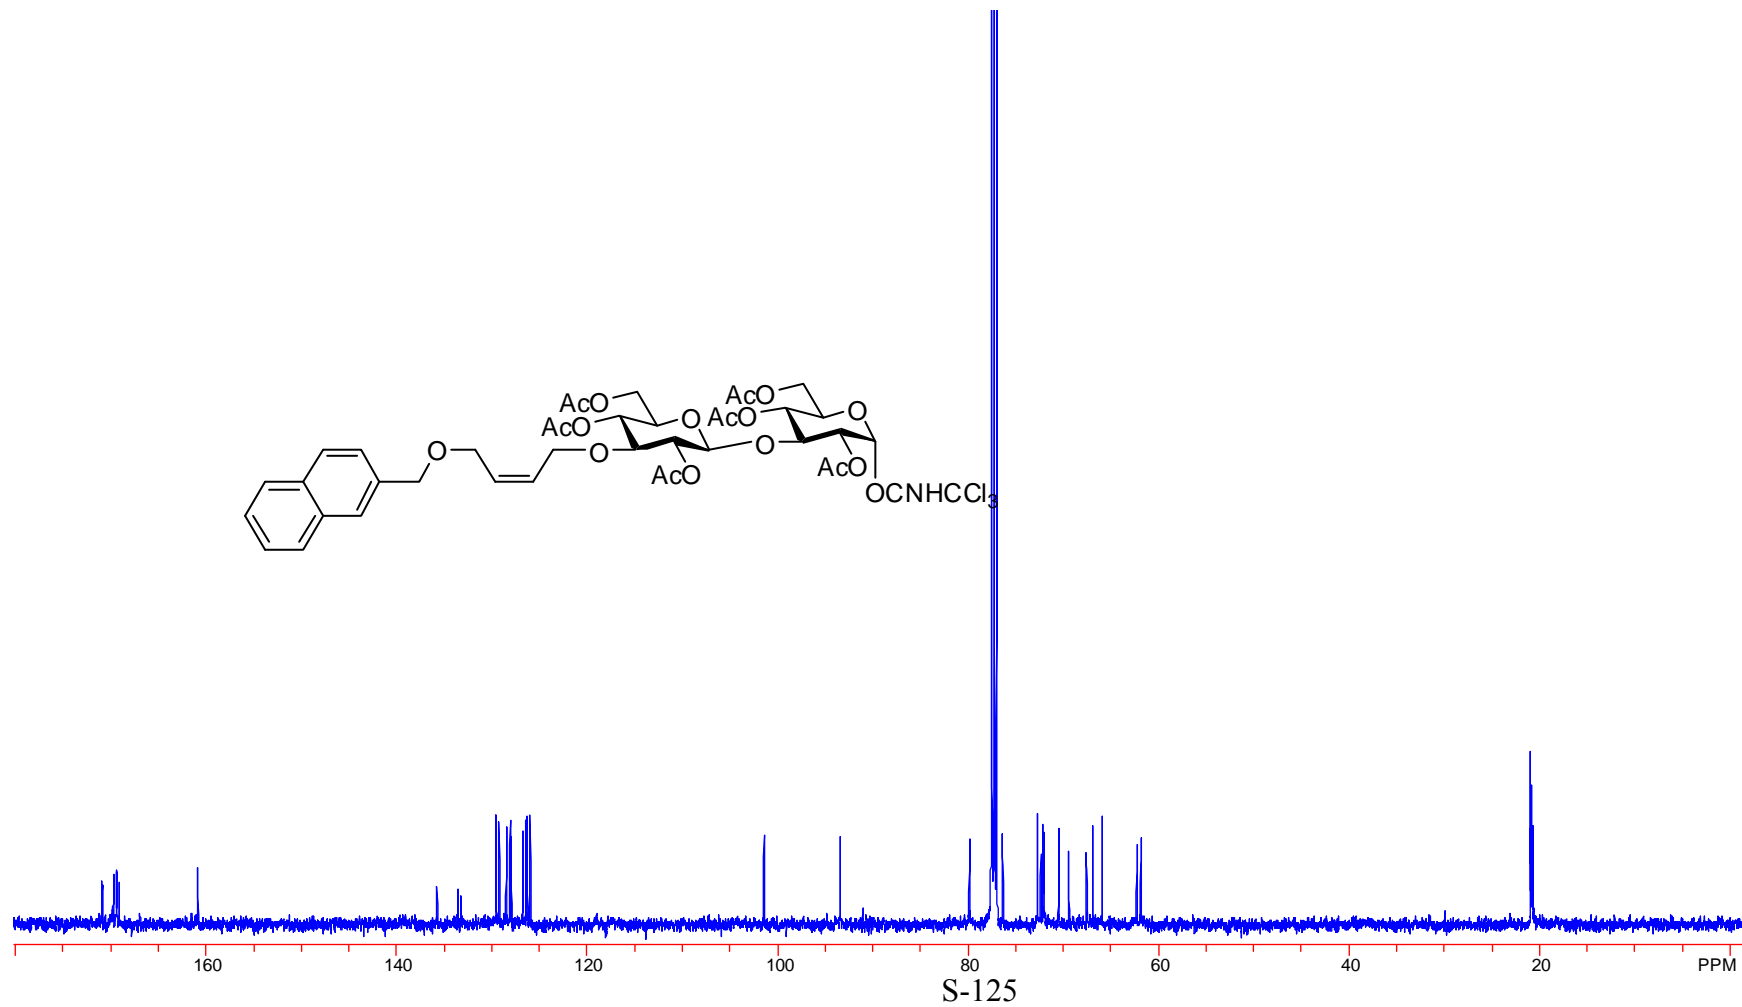

<sup>1</sup>H-NMR spectrum (CDCl<sub>3</sub>, 500 MHz) Methyl 2,2',4,4',6,6'-hexa-*O*-acetyl-3'-*O*-[4-(2-naphthylmethoxy)but-2*Z*-enyl]-β-D-laminaribioside (90).

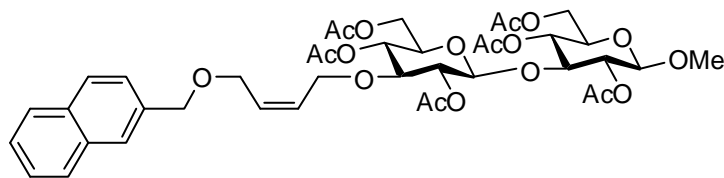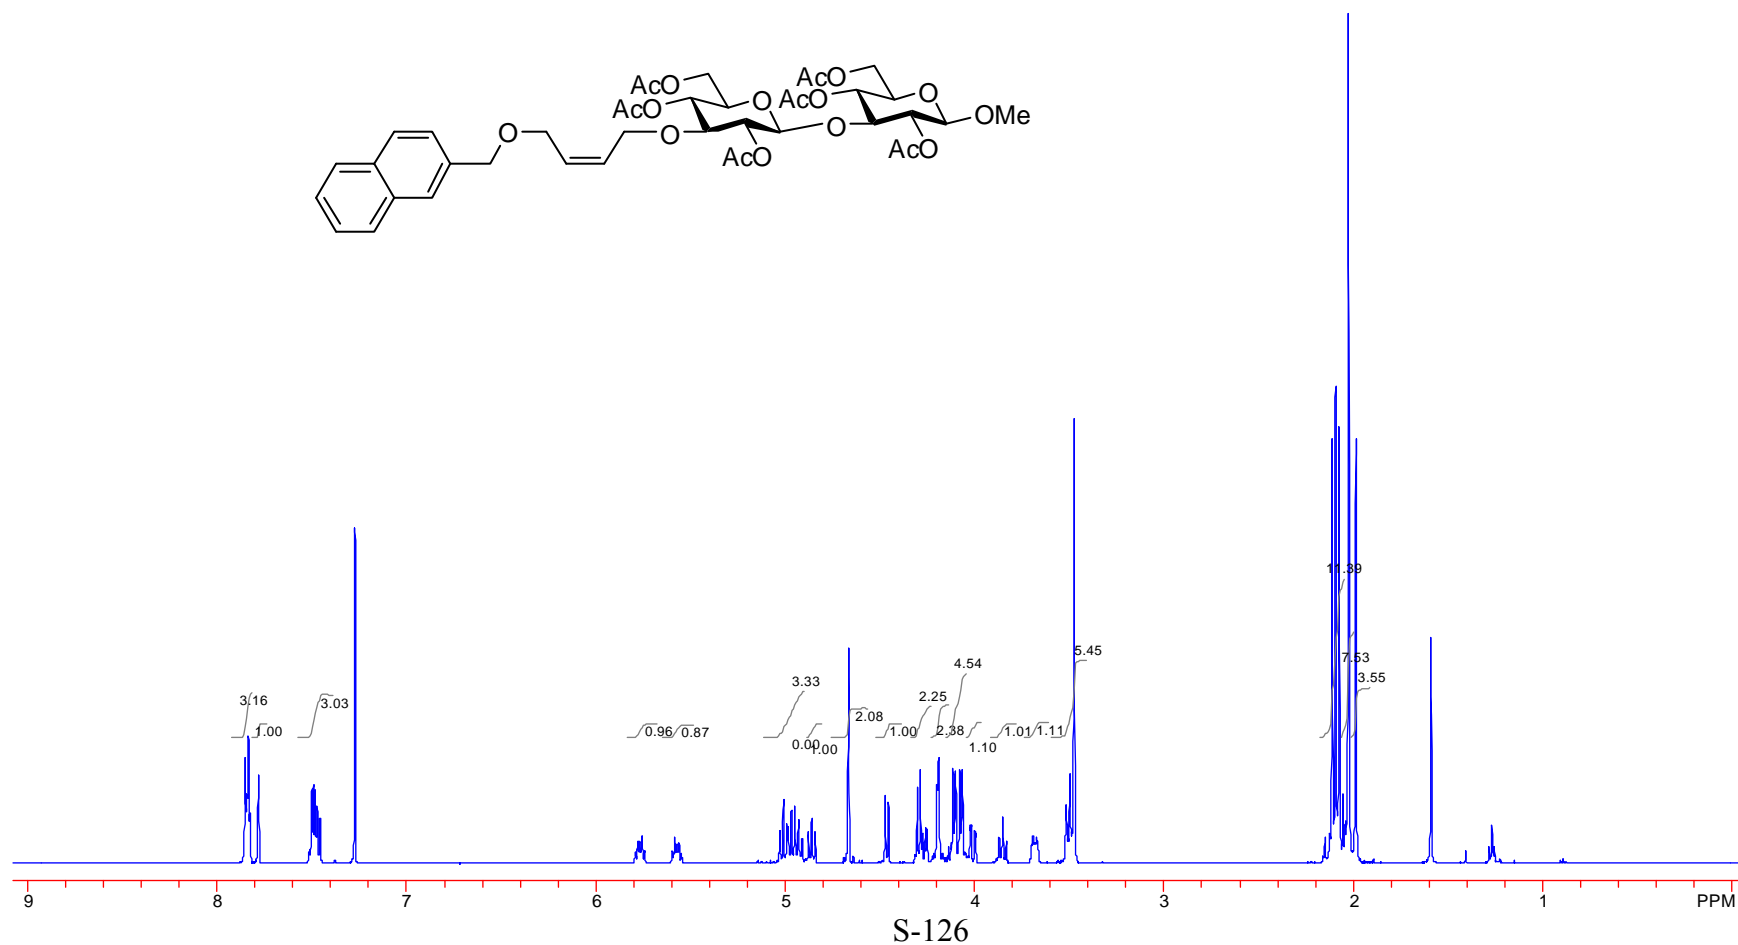

$^{13}\text{C}$ -NMR spectrum ( $\text{CDCl}_3$ , 125 MHz) Methyl 2,2',4,4',6,6'-hexa-*O*-acetyl-3'-*O*-[4-(2-naphthylmethoxy)but-2*Z*-enyl]- $\beta$ -D-laminaribioside (90).

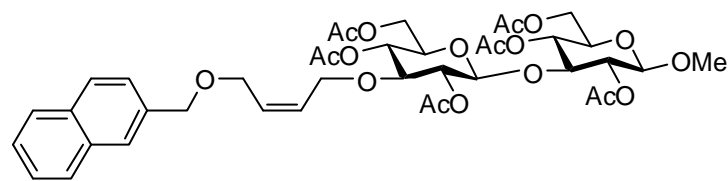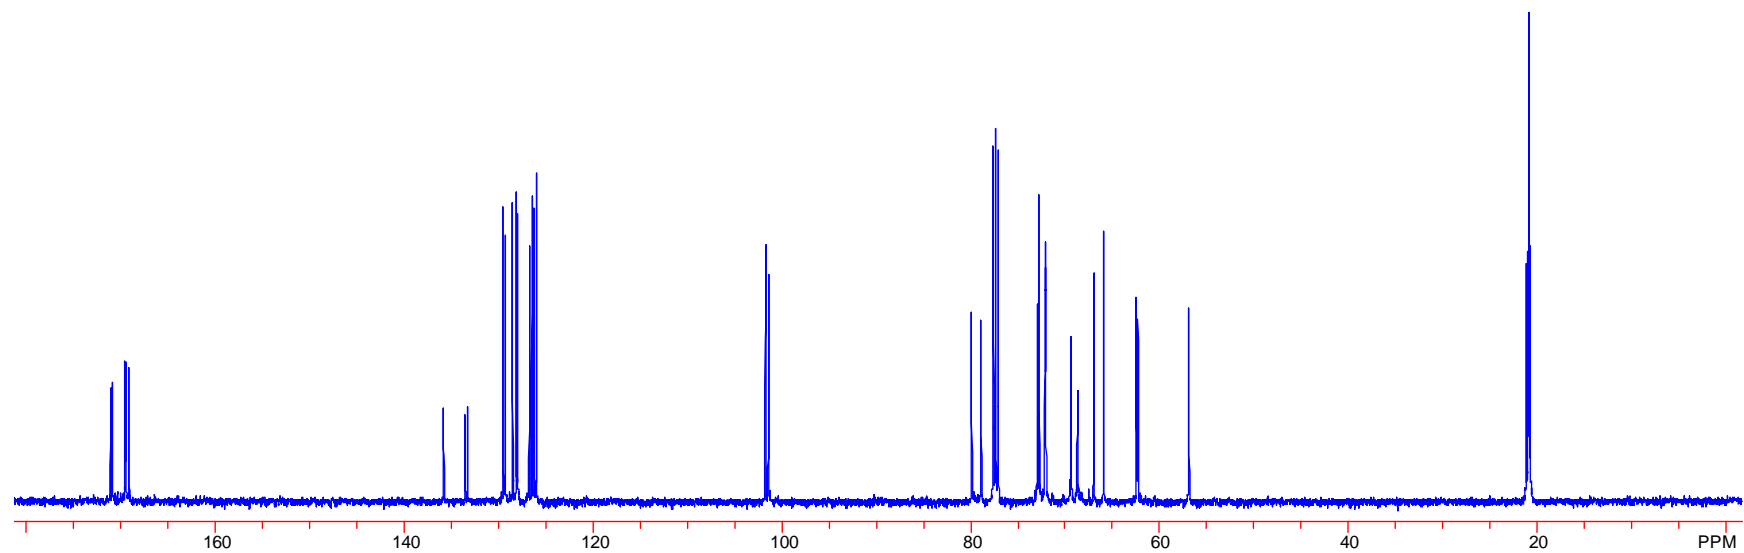

S-127

<sup>1</sup>H-NMR spectrum (CDCl<sub>3</sub>, 500 MHz) Methyl 2,2',4,4',6,6'-hexa-*O*-acetyl-3'-*O*-[4-hydroxybut-2*Z*-enyl]-β-D-laminaribioside (**91**).

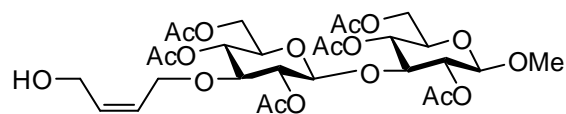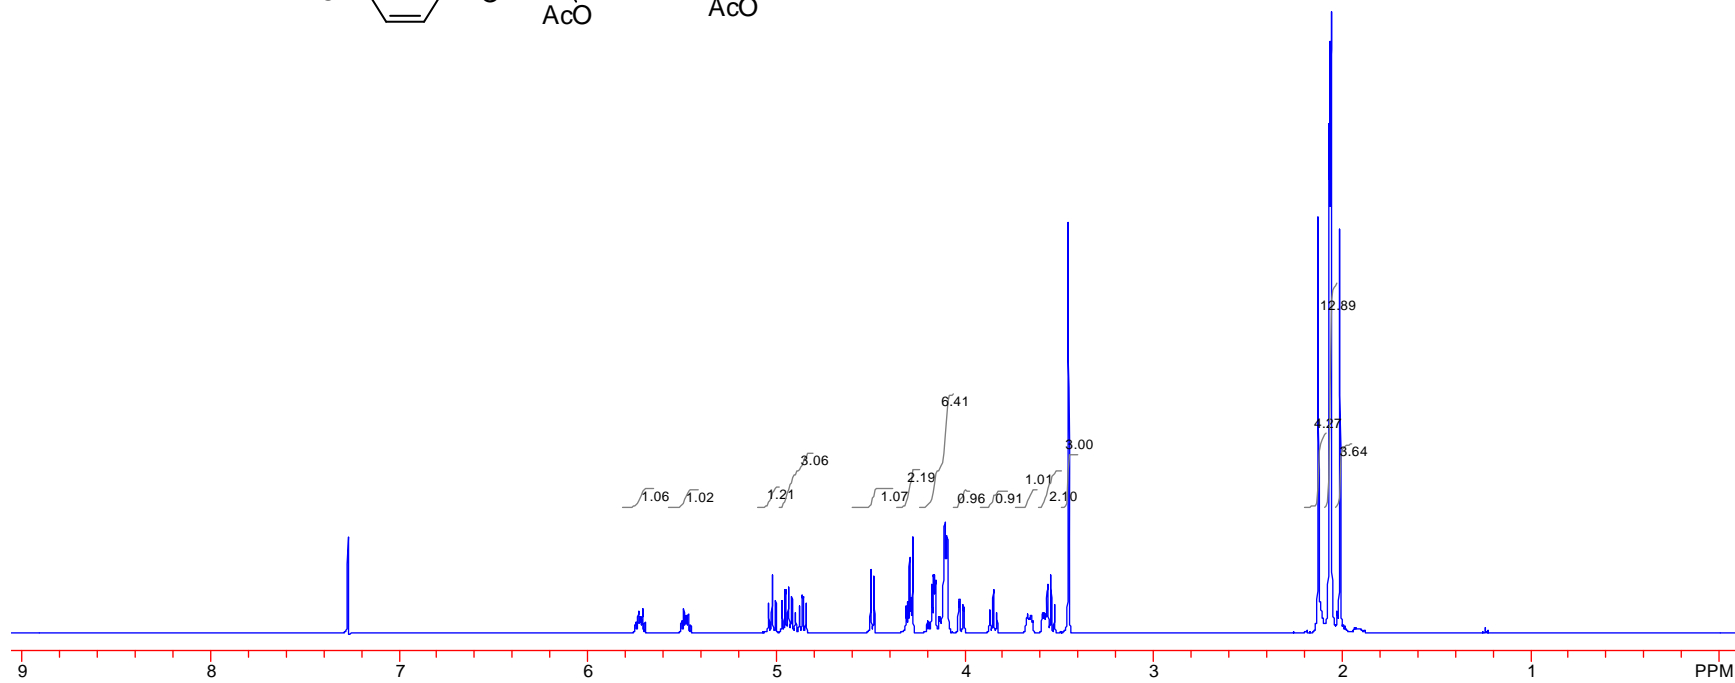

S-128



$^{13}\text{C}$ -NMR spectrum ( $\text{CDCl}_3$ , 125 MHz) Methyl 2,2',4,4',6,6'-hexa-*O*-acetyl-3'-*O*-[4-hydroxybut-2*Z*-enyl]- $\beta$ -D-laminaribioside (**91**).

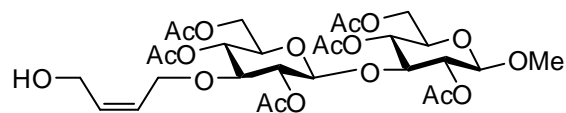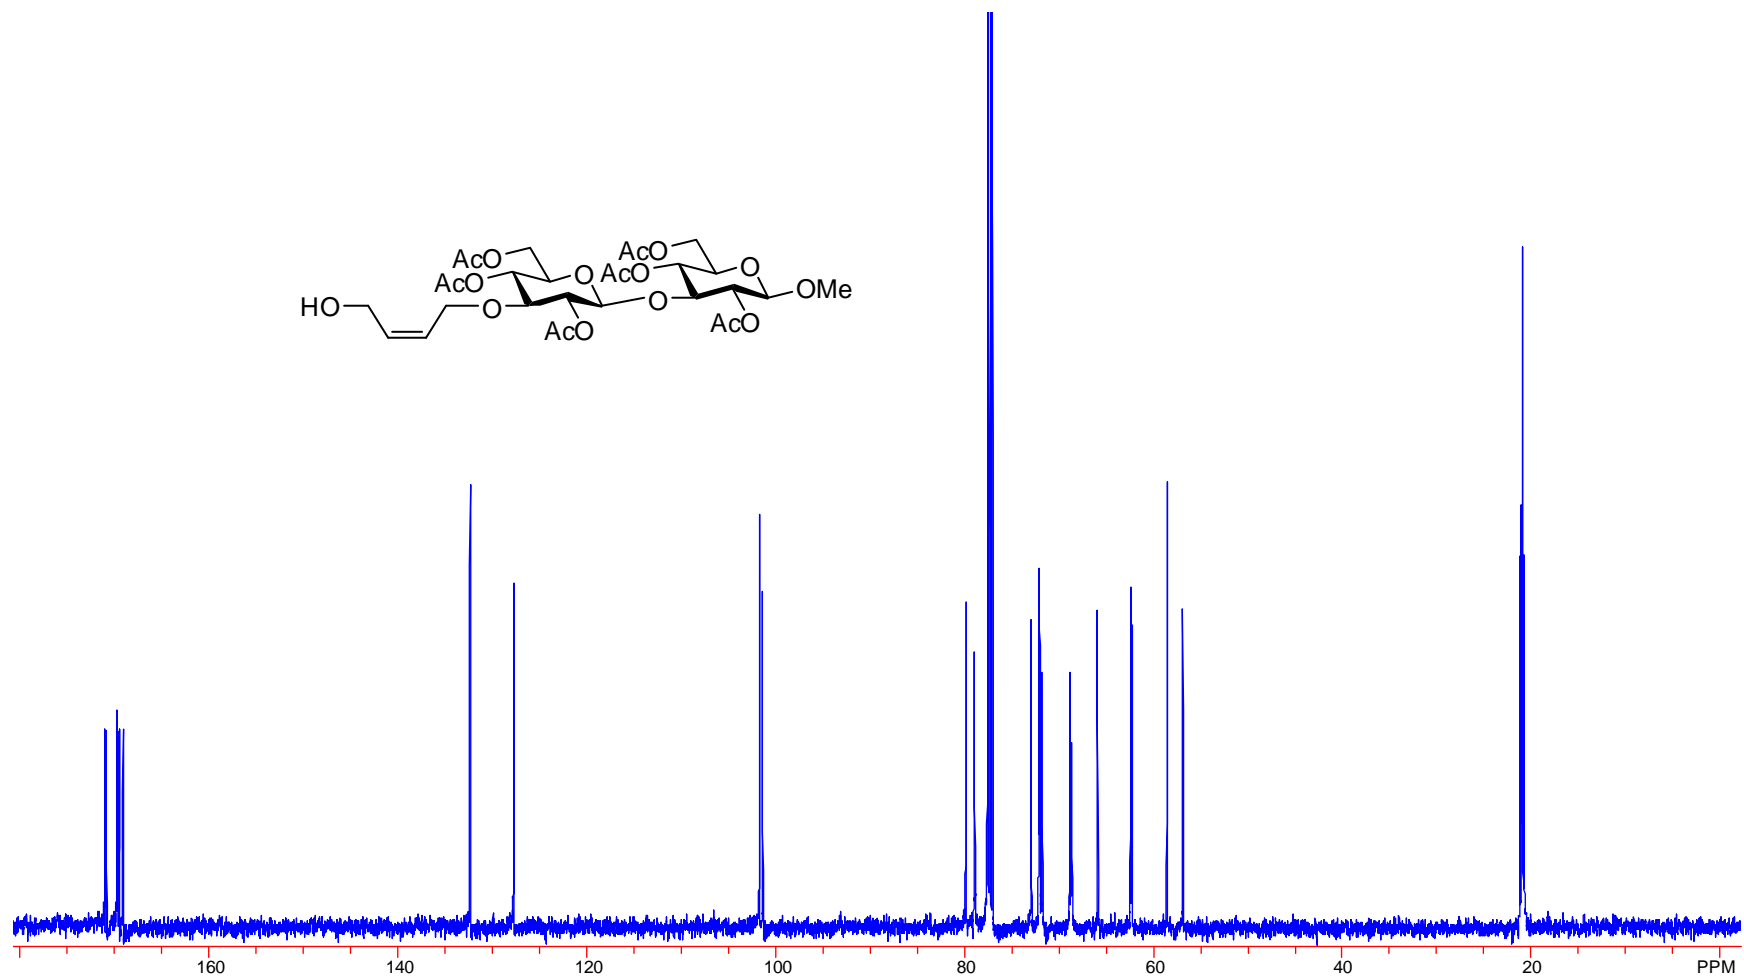

S-129

$^1\text{H-NMR}$  spectrum ( $\text{CDCl}_3$ , 500 MHz) Methyl 2,2',4,4',6,6'-hexa-*O*-acetyl-3'-*O*-[4-(phenylthionocarbonyloxy)but-2*Z*-enyl]- $\beta$ -D-laminaribioside (**92**).

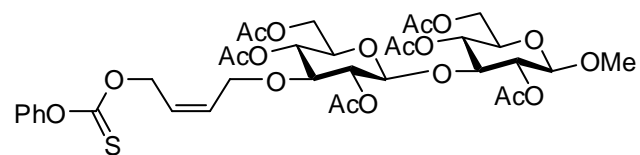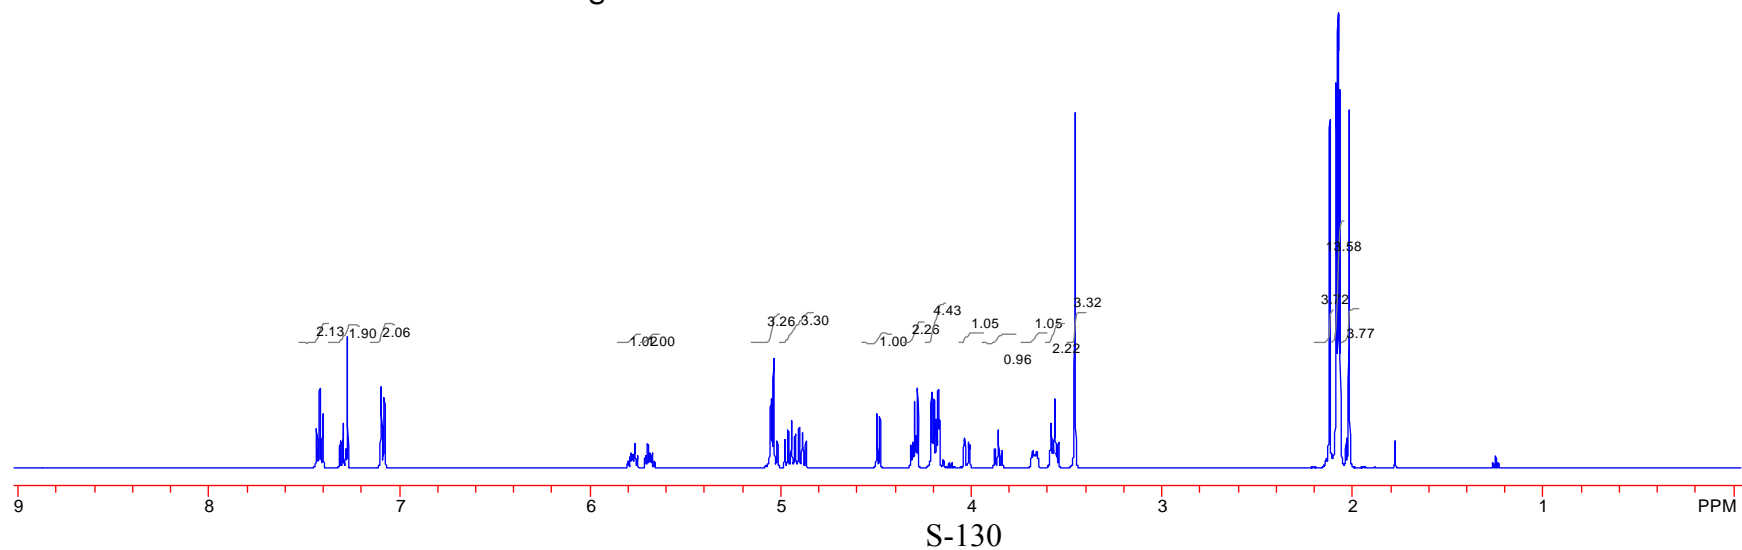

$^{13}\text{C}$ -NMR spectrum ( $\text{CDCl}_3$ , 125 MHz) Methyl 2,2',4,4',6,6'-hexa-*O*-acetyl-3'-*O*-[4-(phenylthionocarbonyloxy)but-2*Z*-enyl]- $\beta$ -D-laminaribioside (**92**).

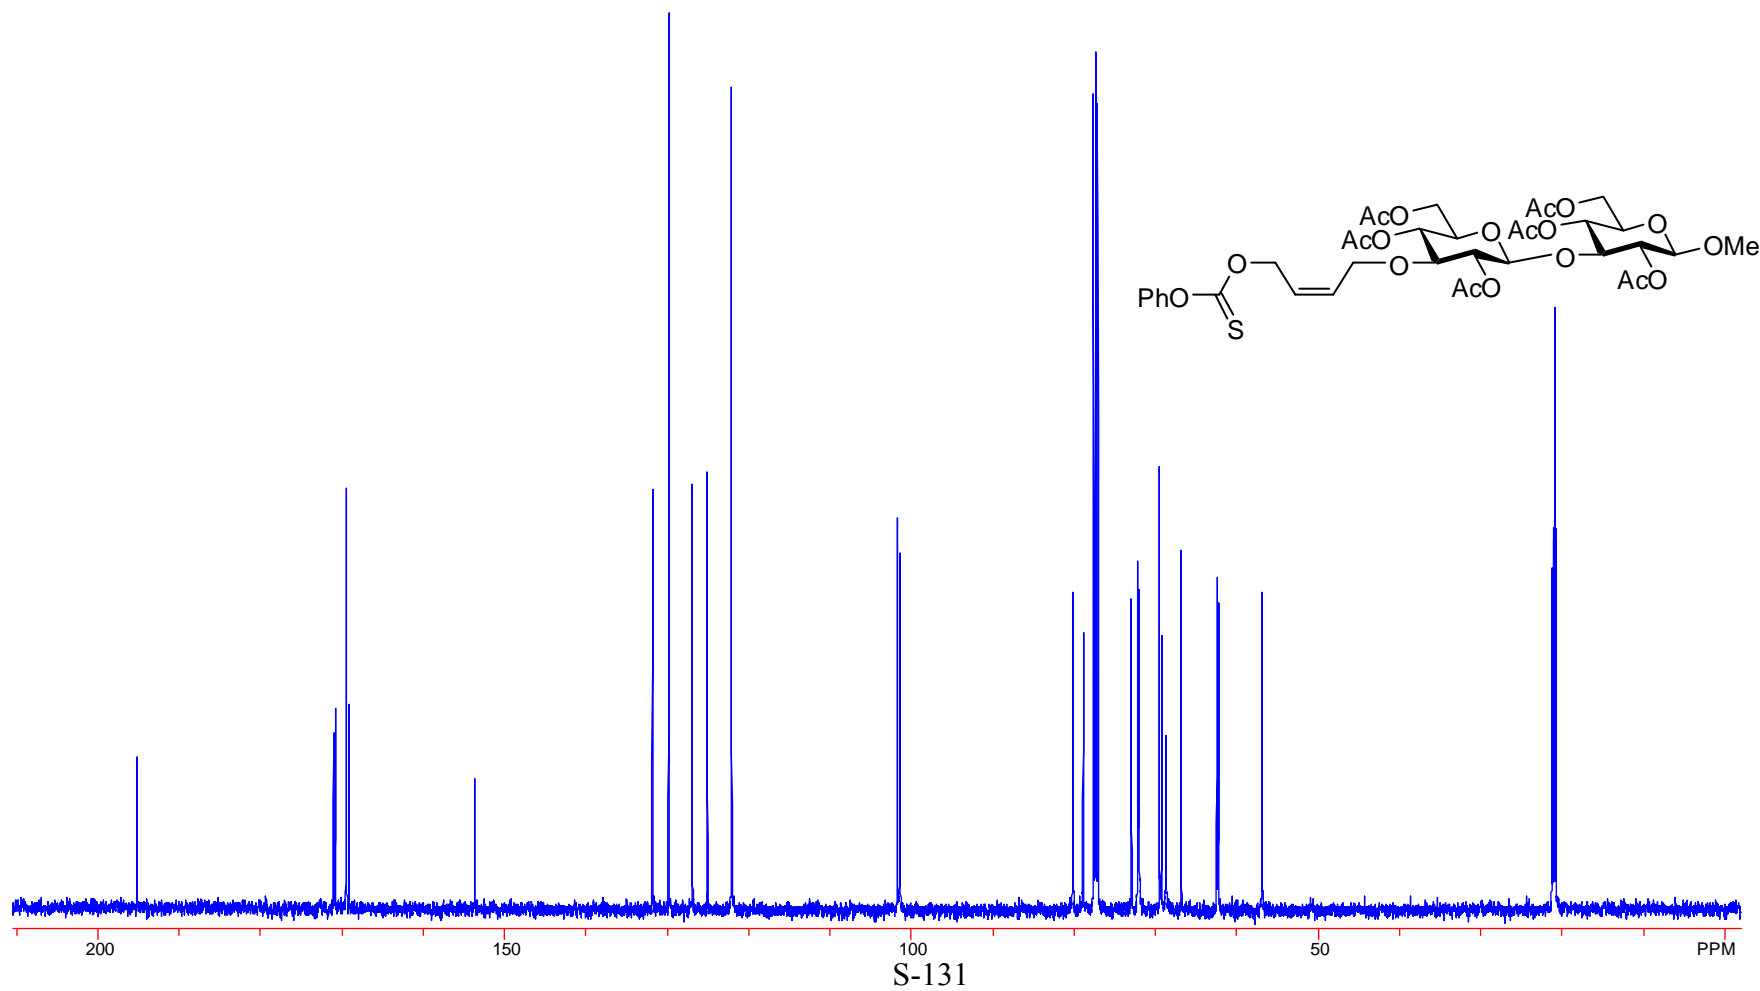

<sup>1</sup>H-NMR spectrum (CDCl<sub>3</sub>, 500 MHz) Methyl 2,2',4,4',6,6'-hexa-*O*-acetyl-3'-*O*-[2-phenyloxycarbonylthioxy]but-3-enyl]-β-D-laminaribioside (93).

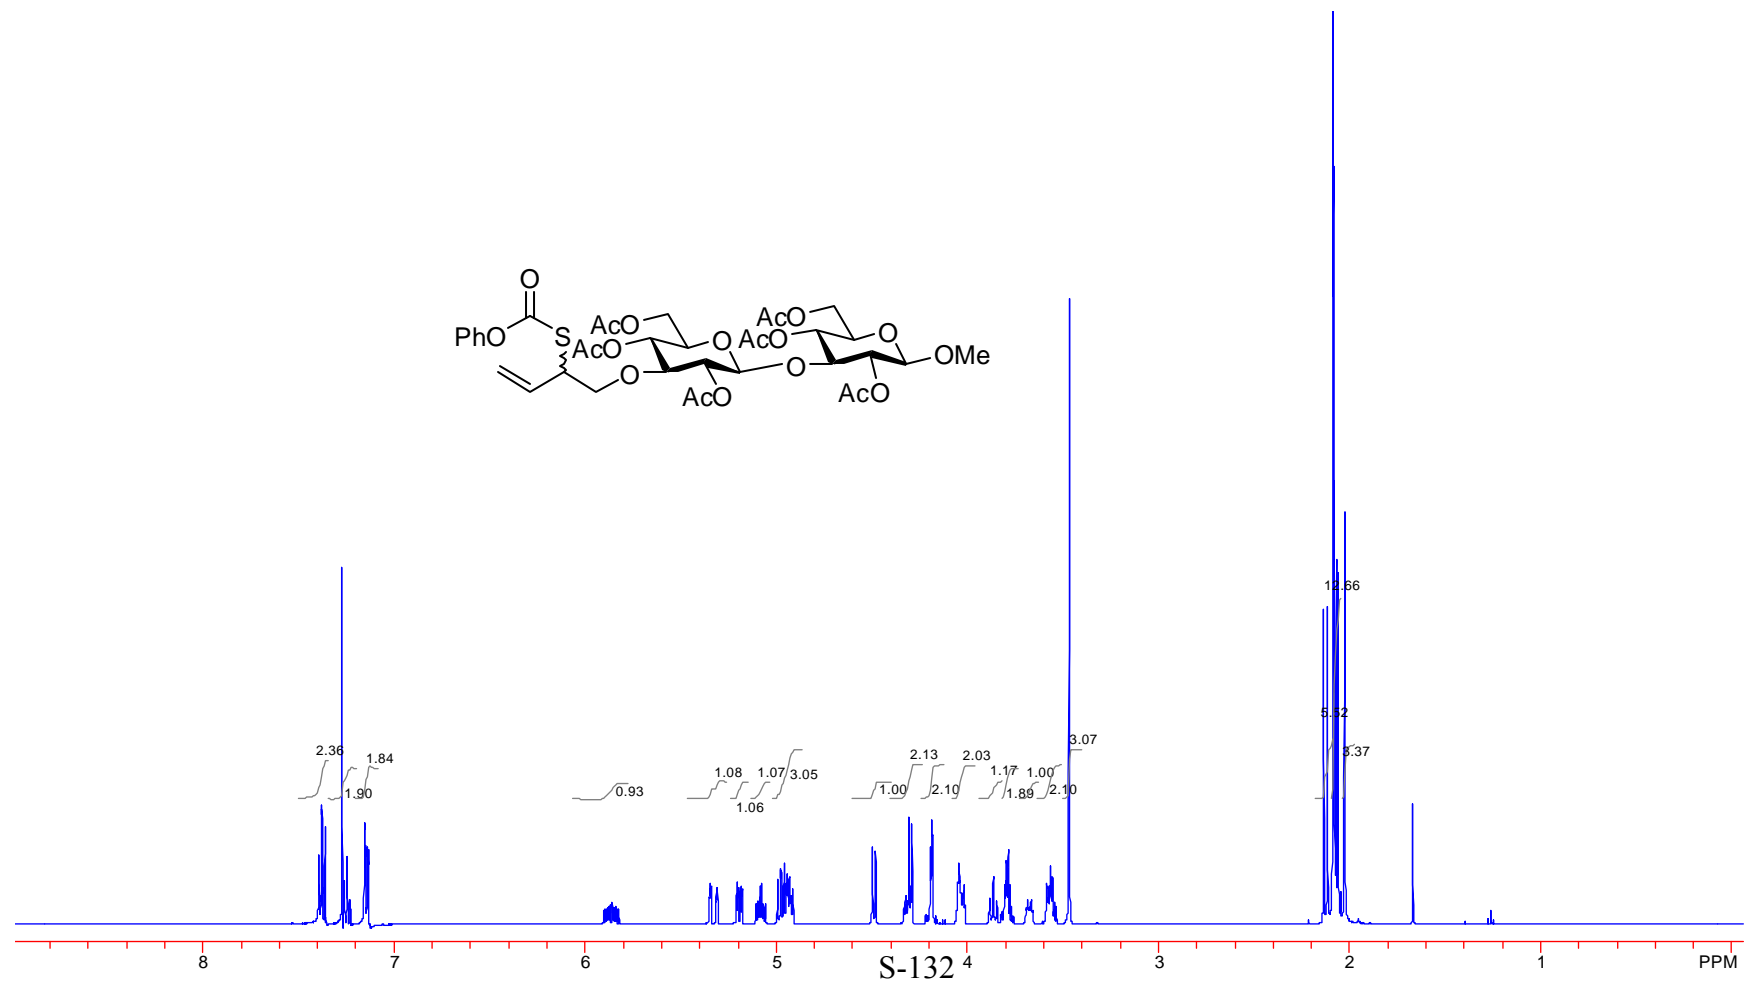

$^{13}\text{C}$ -NMR spectrum ( $\text{CDCl}_3$ , 125 MHz) Methyl 2,2',4,4',6,6'-hexa-*O*-acetyl-3'-*O*-[2-phenyloxycarbonylthioxy]but-3-enyl]- $\beta$ -D-laminaribioside (93).

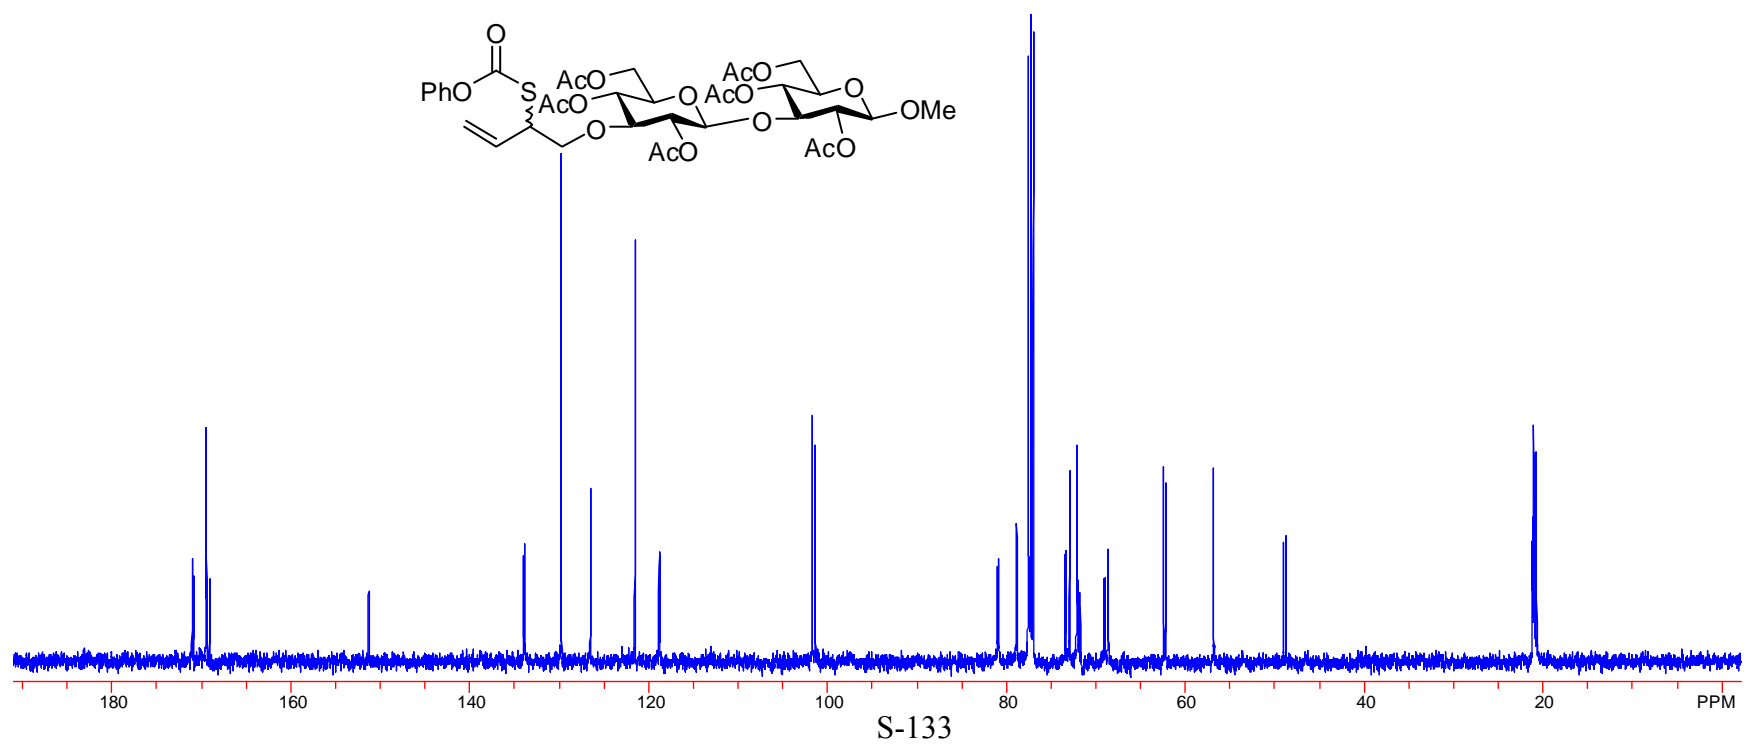

$^1\text{H-NMR}$  spectrum ( $\text{CD}_3\text{OD}$ , 500 MHz) Methyl 3'-*O*-(2-pyridin-2-ylthio)-but-3-enyl- $\beta$ -D-laminaribioside (**63**).

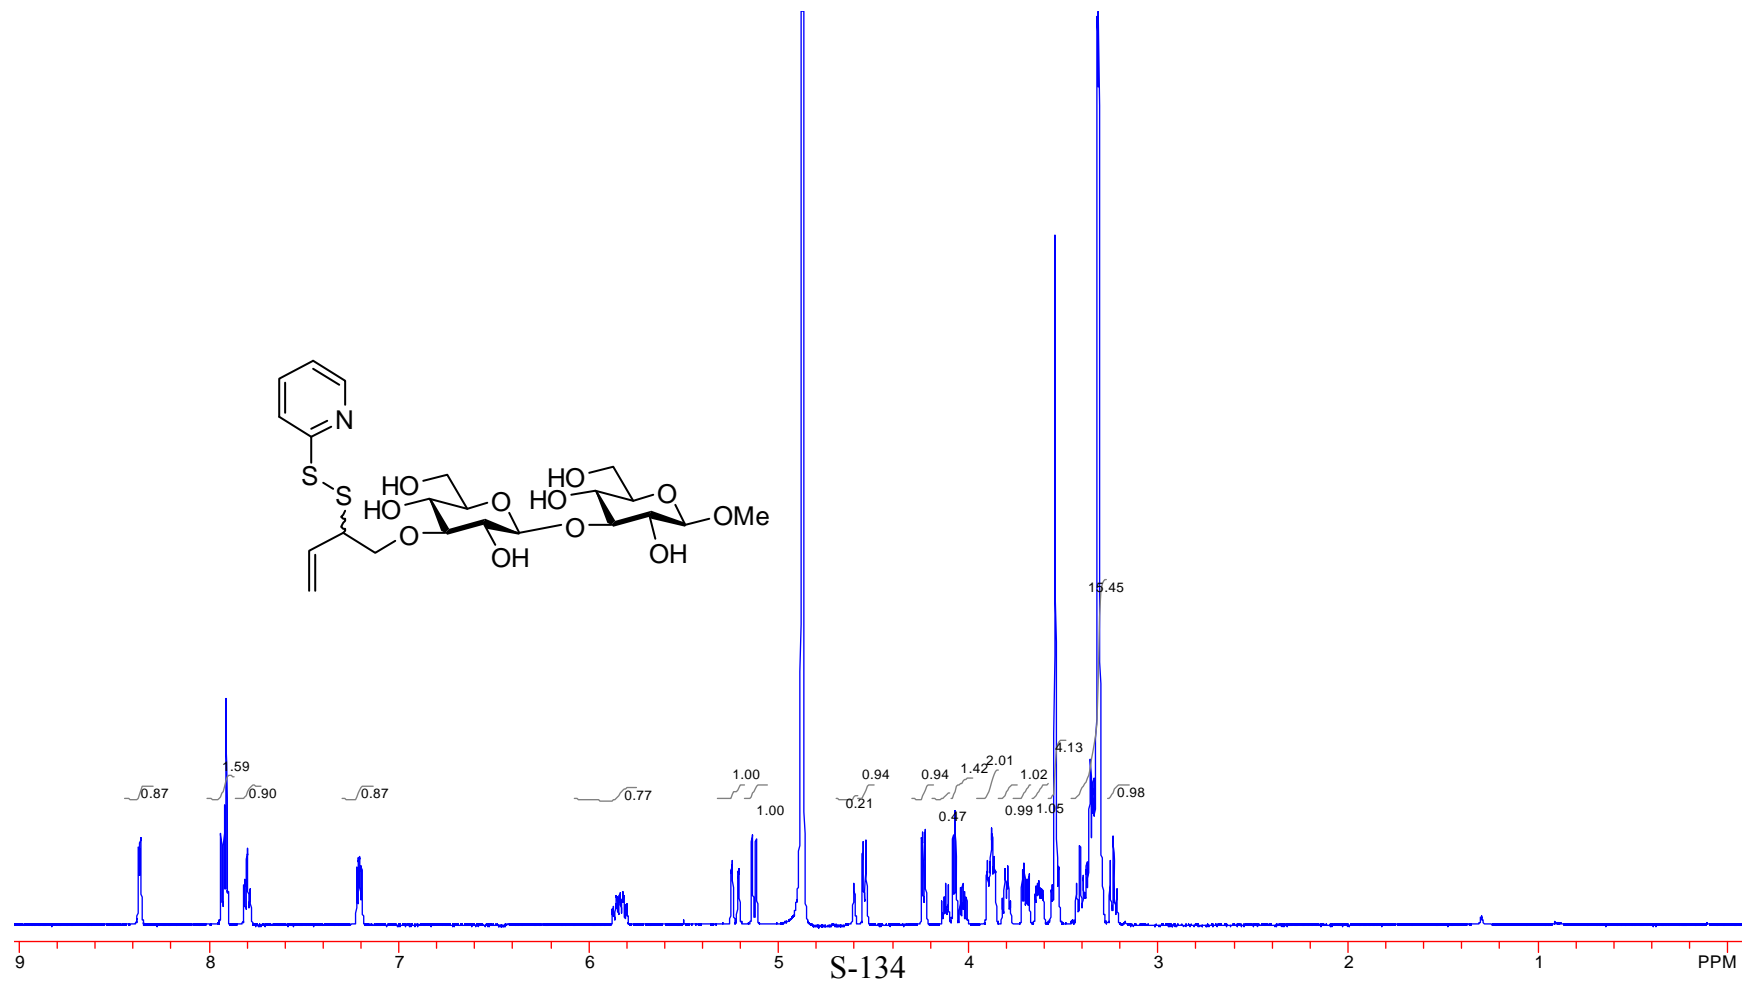

$^{13}\text{C}$ -NMR spectrum ( $\text{CD}_3\text{OD}$ , 125 MHz) Methyl 3'-*O*-(2-pyridin-2-ylthio)-but-3-enyl- $\beta$ -D-laminaribioside (**63**).

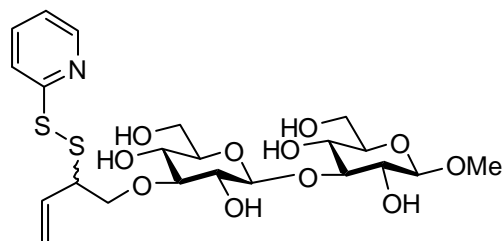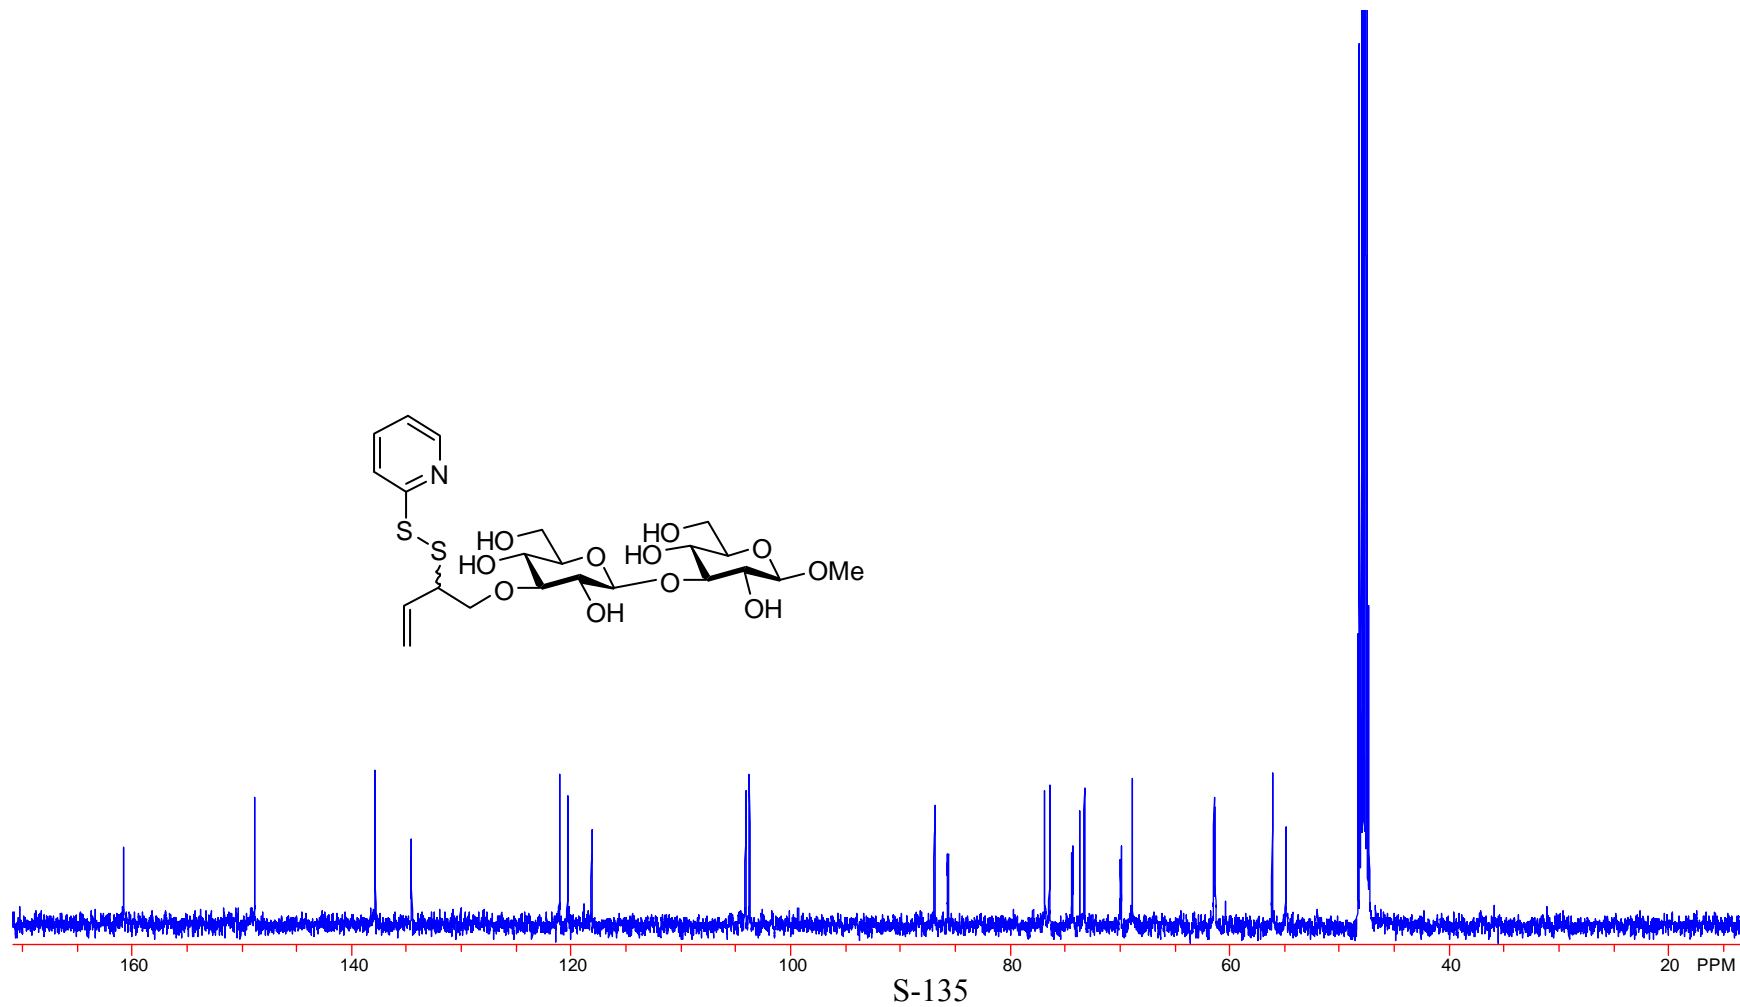

$^1\text{H-NMR}$  spectrum ( $\text{CDCl}_3$ , 500 MHz) 1-Thio-hepta-*O*-acetyl- $\beta$ -D-lamaribiose (**65**).

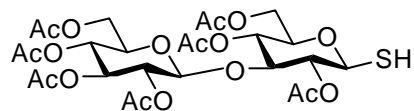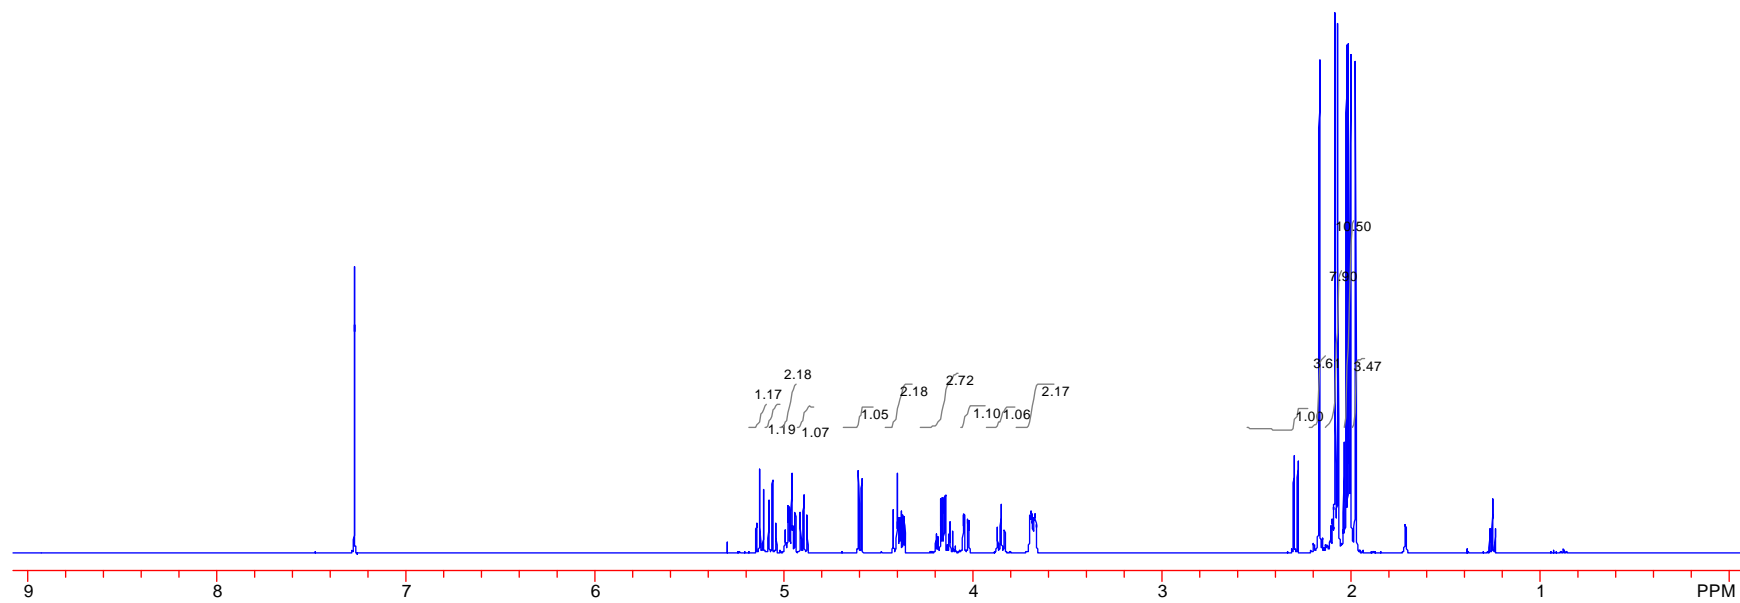

S-136



$^{13}\text{C}$ -NMR spectrum ( $\text{CDCl}_3$ , 125 MHz) 1-Thio-hepta-*O*-acetyl- $\beta$ -D-laminaribiose (**65**).

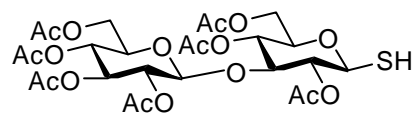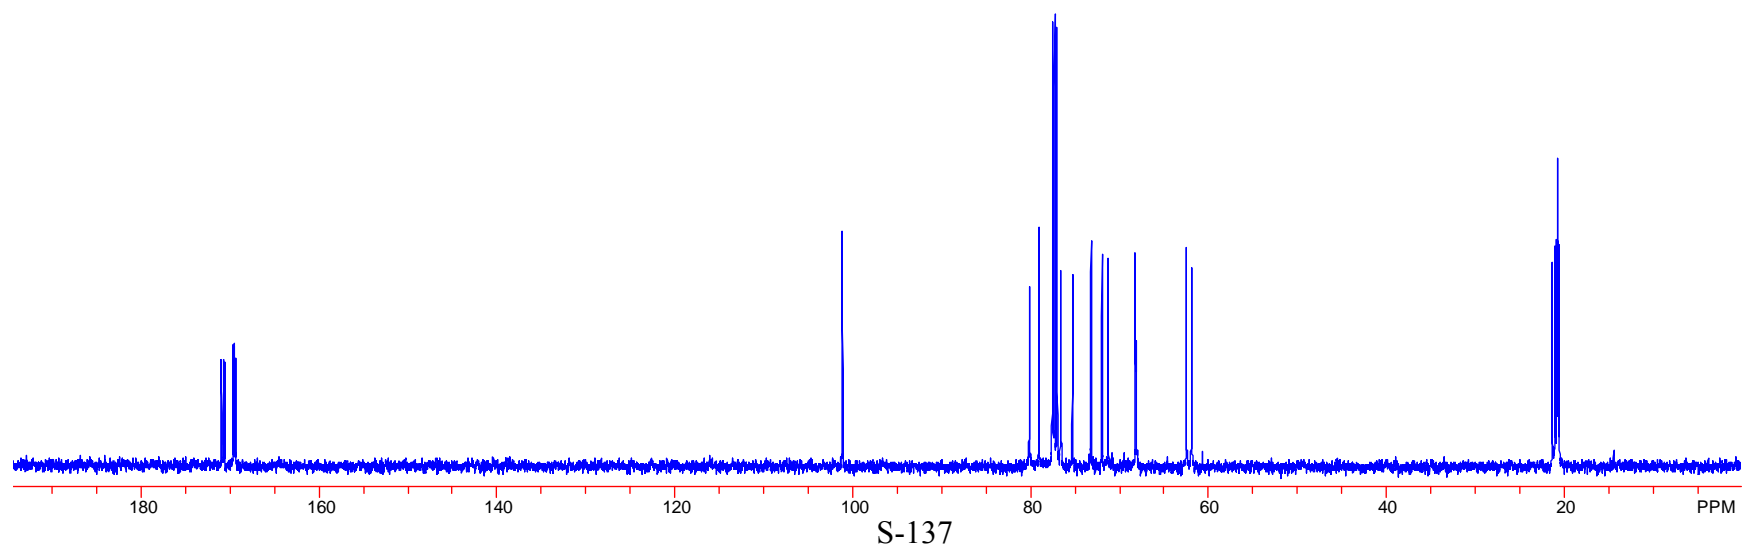

<sup>1</sup>H-NMR spectrum (CDCl<sub>3</sub>, 400 MHz) Benzyl 2-*O*-benzoyl-4,6-*O*-benzylidene-2',4',6'-tri-*O*-acetyl-3'-acetylthio-β-D-laminaribioside (**95**).

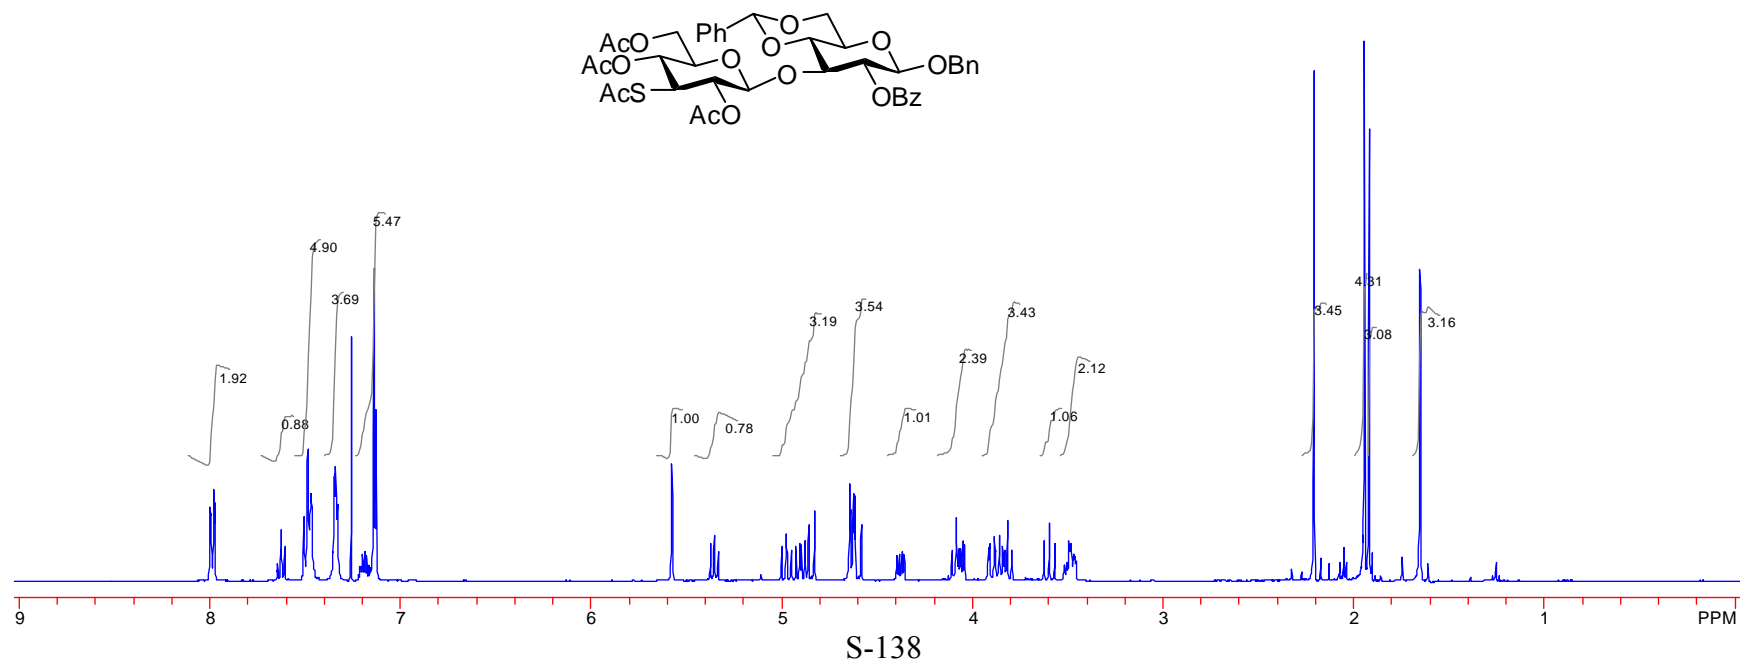

$^{13}\text{C}$ -NMR spectrum ( $\text{CDCl}_3$ , 100 MHz) Benzyl 2-*O*-benzoyl-4,6-*O*-benzylidene-2',4',6'-tri-*O*-acetyl-3'-acetylthio- $\beta$ -D-laminaribioside (**95**).

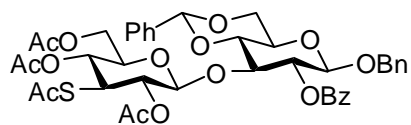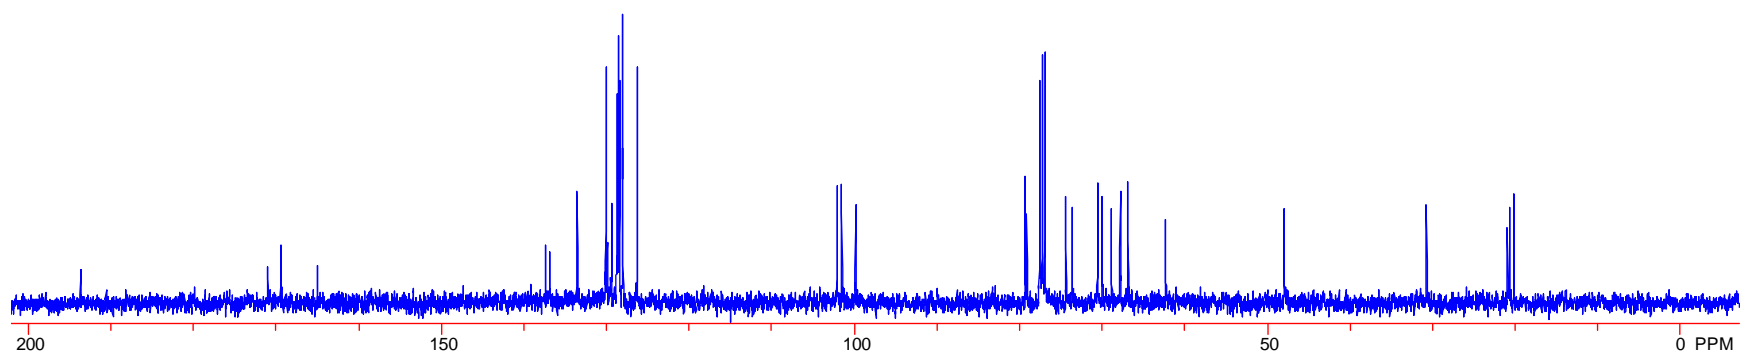

S-139

<sup>1</sup>H-NMR spectrum (CDCl<sub>3</sub>, 400 MHz) Benzyl 2-*O*-benzoyl-2',4',6'-tri-*O*-acetyl-3'-acetylthio-β-D-laminaribioside (**64**).

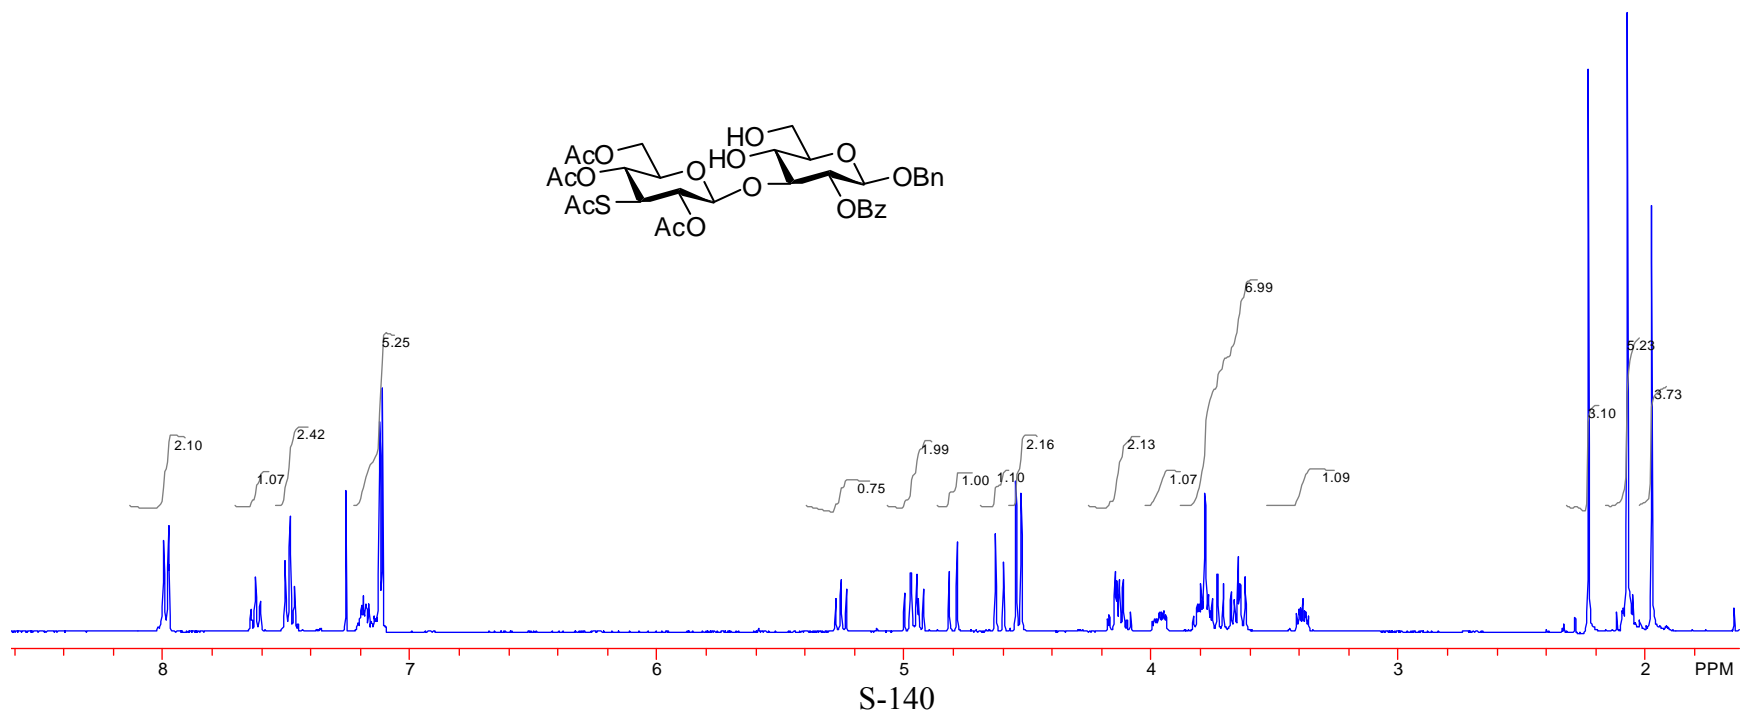

$^{13}\text{C}$ -NMR spectrum ( $\text{CDCl}_3$ , 100 MHz) Benzyl 2-*O*-benzoyl-2',4',6'-tri-*O*-acetyl-3'-acetylthio- $\beta$ -D-laminaribioside (**64**).

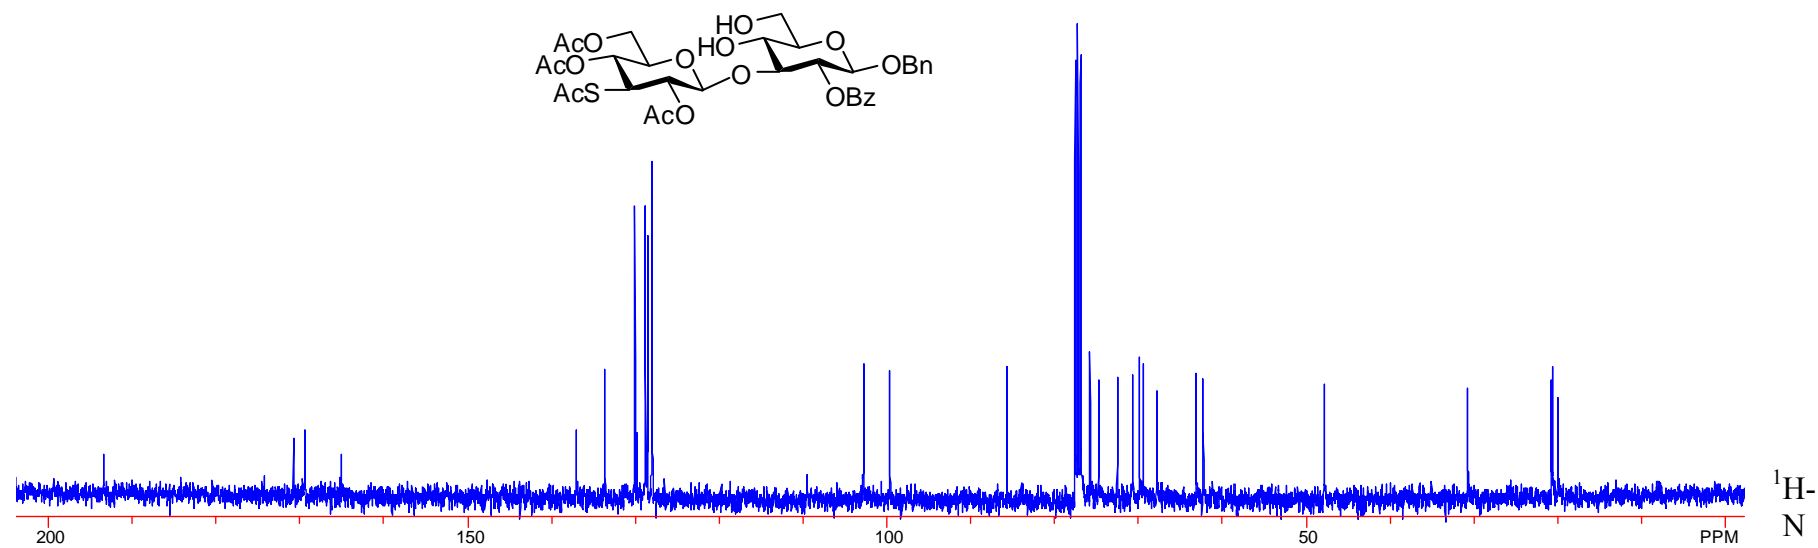

S-141

MR spectrum (CD<sub>3</sub>OD, 400 MHz) Methyl 6-[4-*O*-(2,2'-azido-2,2'-dideoxy- $\beta$ -D-gentiobiosyloxy)but-2-*E*-enyl]thio-2,2'-azido-2,2'-dideoxy- $\alpha$ -D-gentiobioside (**66**).

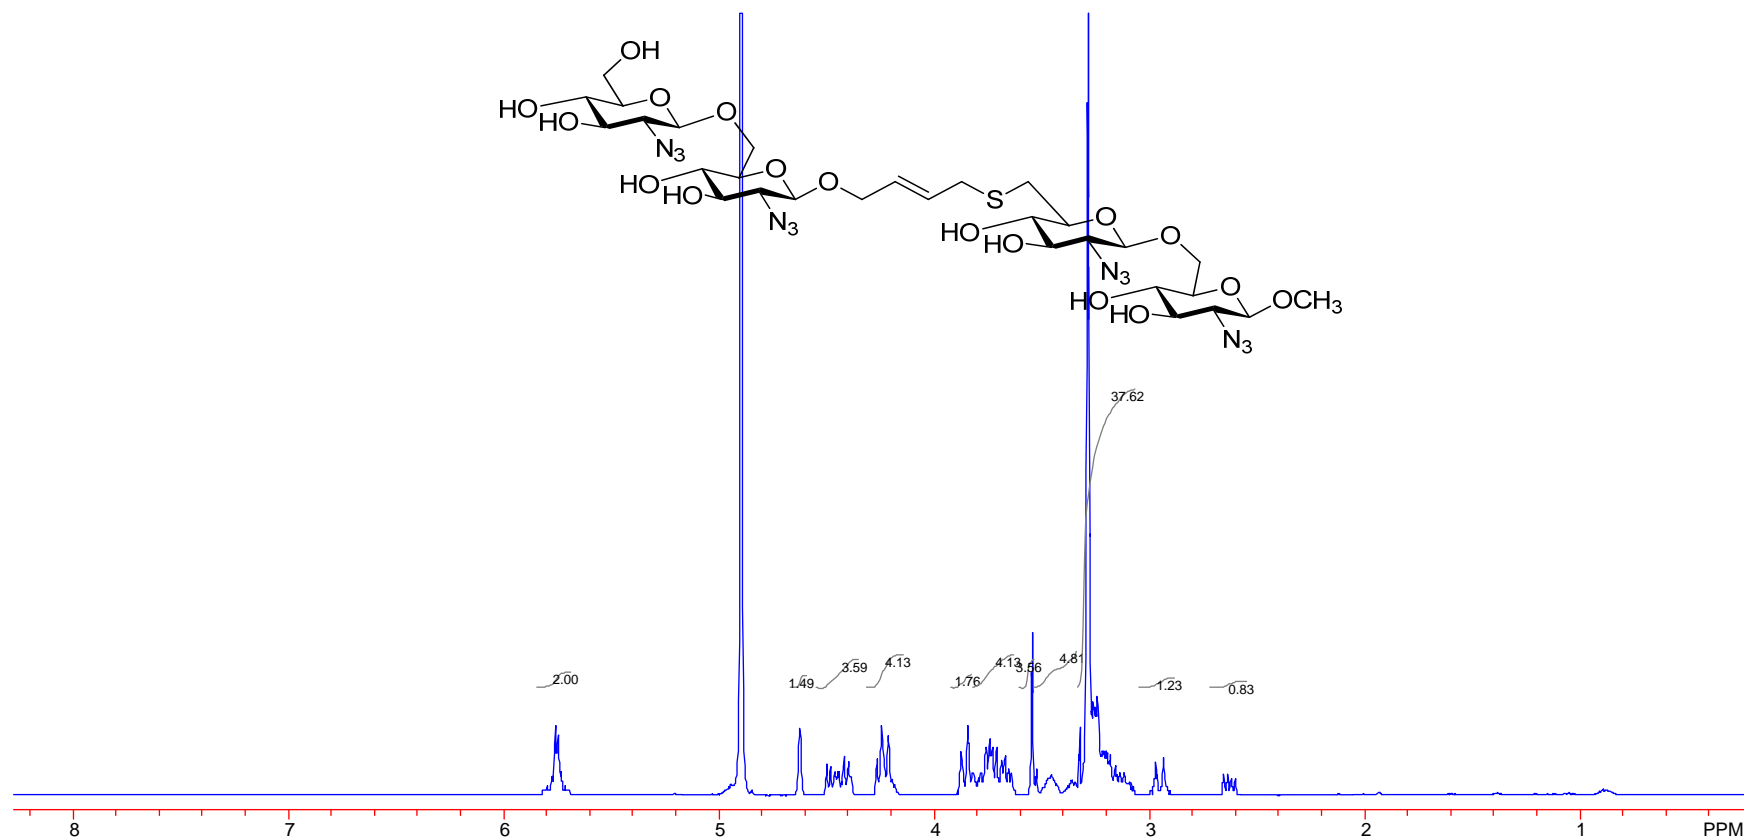

$^{13}\text{C}$ -NMR spectrum ( $\text{CD}_3\text{OD}$ , 100 MHz) Methyl 6-[4-*O*-(2,2'-azido-2,2'-dideoxy- $\beta$ -D-gentiobiosyloxy)but-2*E*-enyl]thio-2,2'-azido-2,2'-dideoxy- $\alpha$ -D-gentiobioside (**66**).

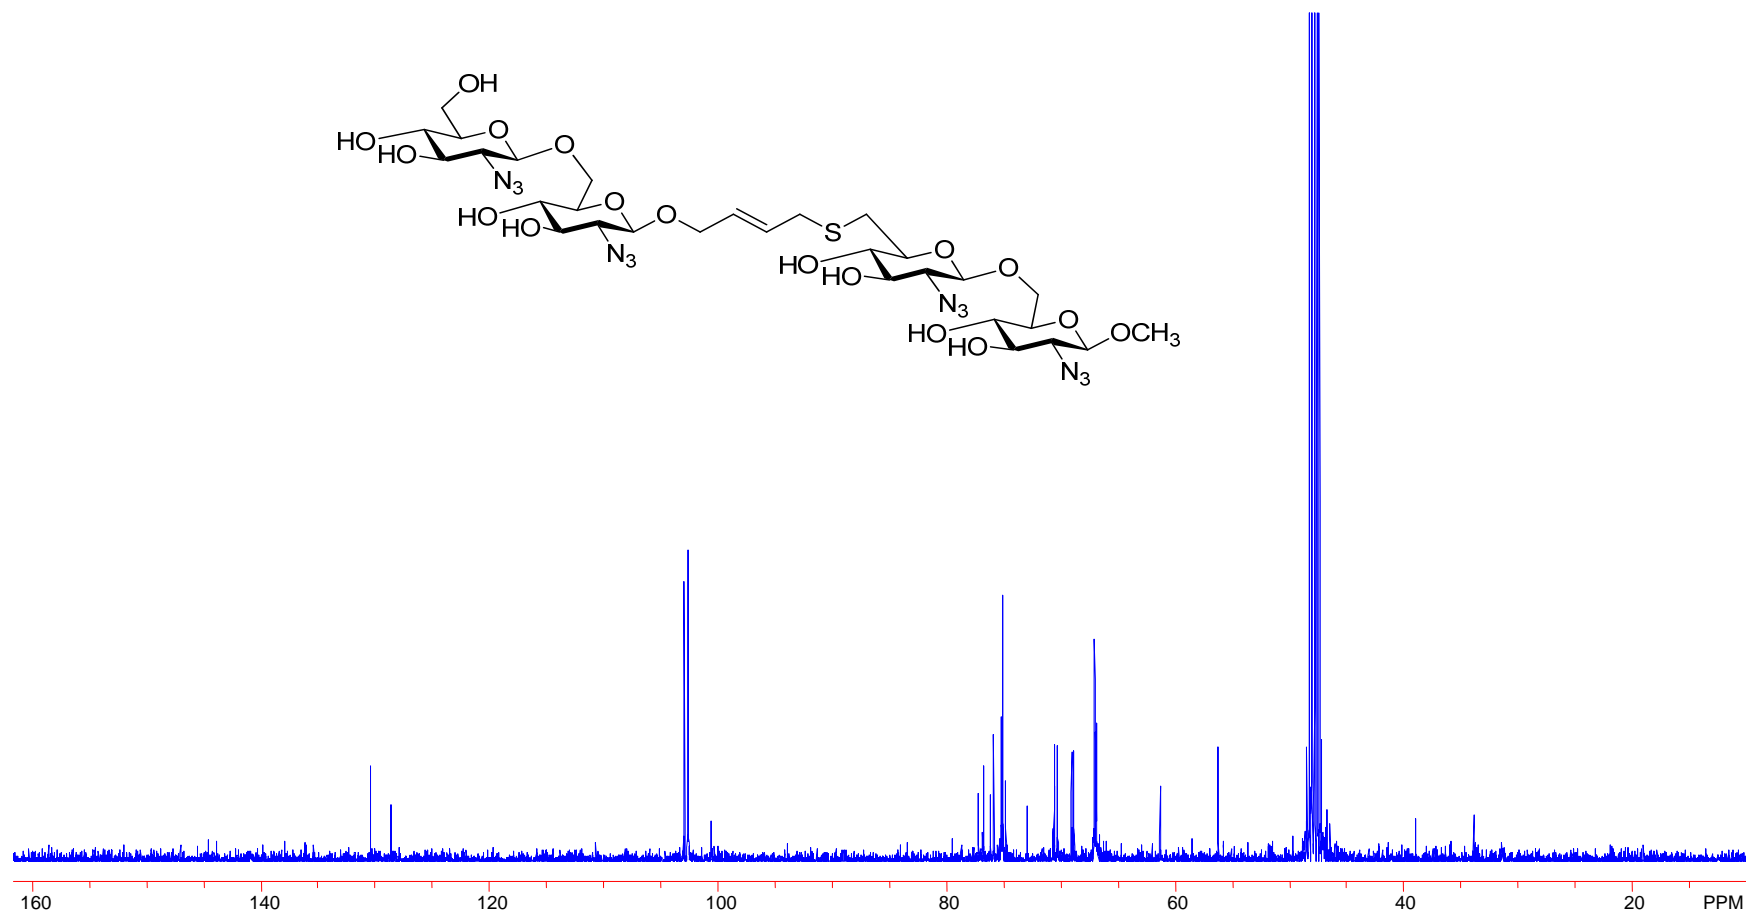

$^1\text{H-NMR}$  spectrum ( $\text{CD}_3\text{OD}$ , 400 MHz) Methyl 6-[4-*O*-(2,2'-dideoxy-2,2'-(2,2,2-trichloroethoxycarbonylamino)- $\beta$ -D-gentiobiosyloxy)but-2*E*-enyl]thio-2,2'-dideoxy-(2,2,2-trichloroethoxycarbonylamino- $\alpha$ -D-gentiobioside (**67**).

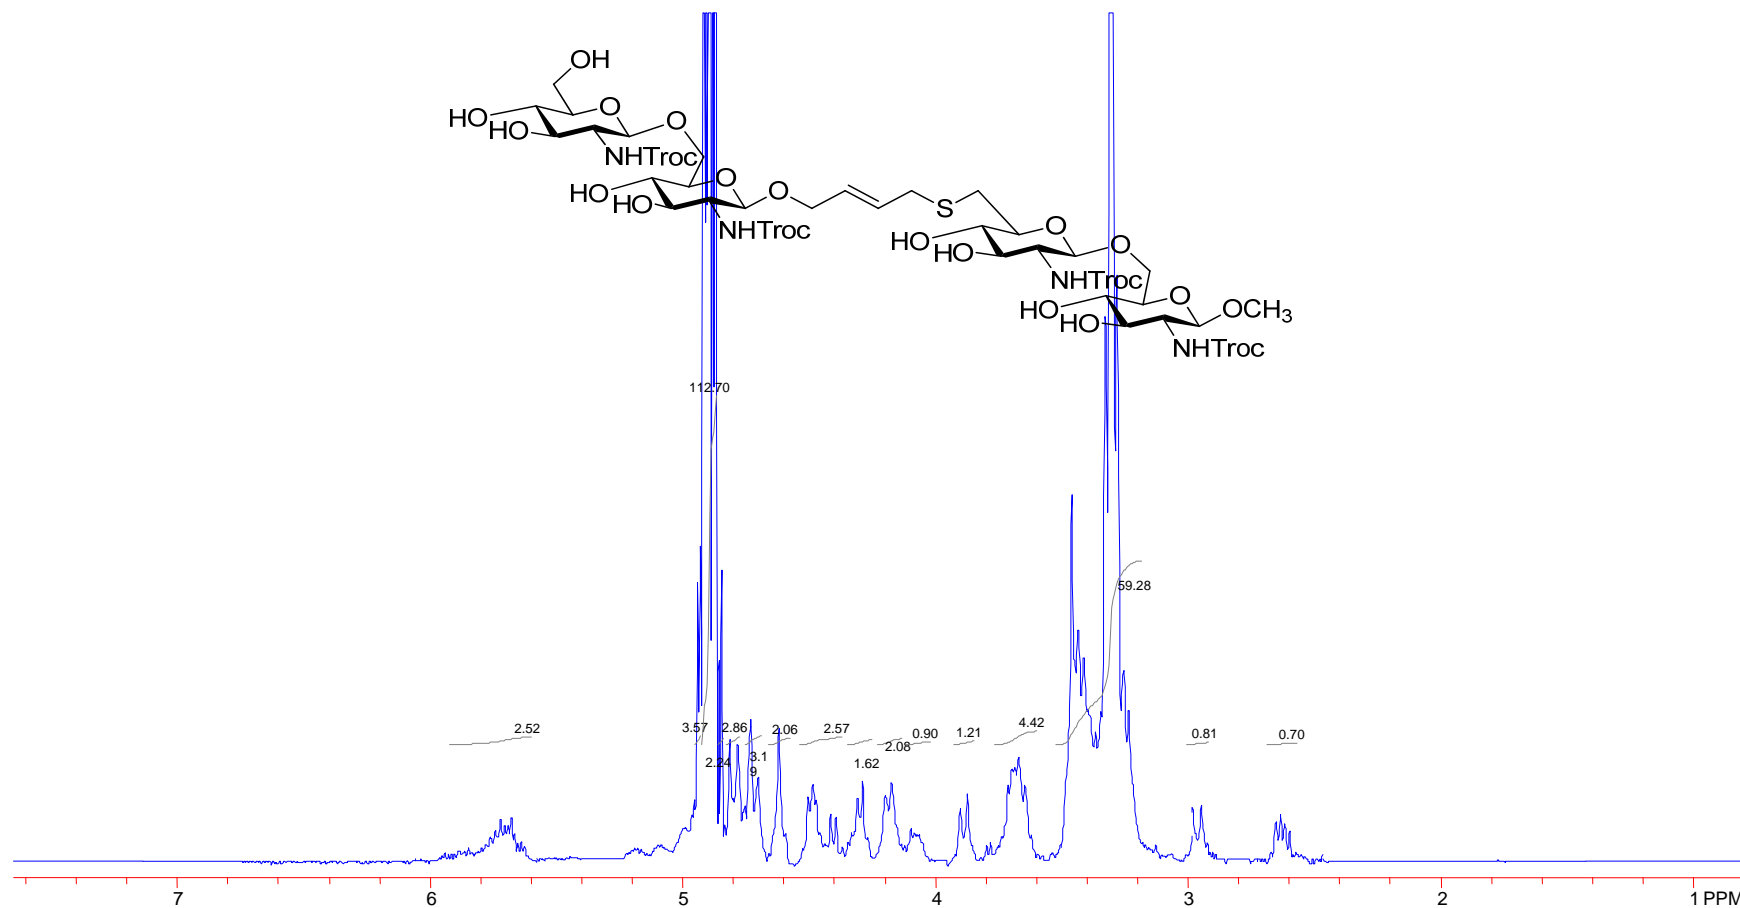



$^{13}\text{C}$ -NMR spectrum ( $\text{CD}_3\text{OD}$ , 100 MHz) Methyl 6-[4-*O*-(2,2'-dideoxy-2,2'-(2,2,2-trichloroethoxycarbonylamino)- $\beta$ -D-gentiobiosyloxy)but-2*E*-enyl]thio-2,2'-dideoxy-(2,2,2-trichloroethoxycarbonylamino- $\alpha$ -D-gentiobioside (**67**).

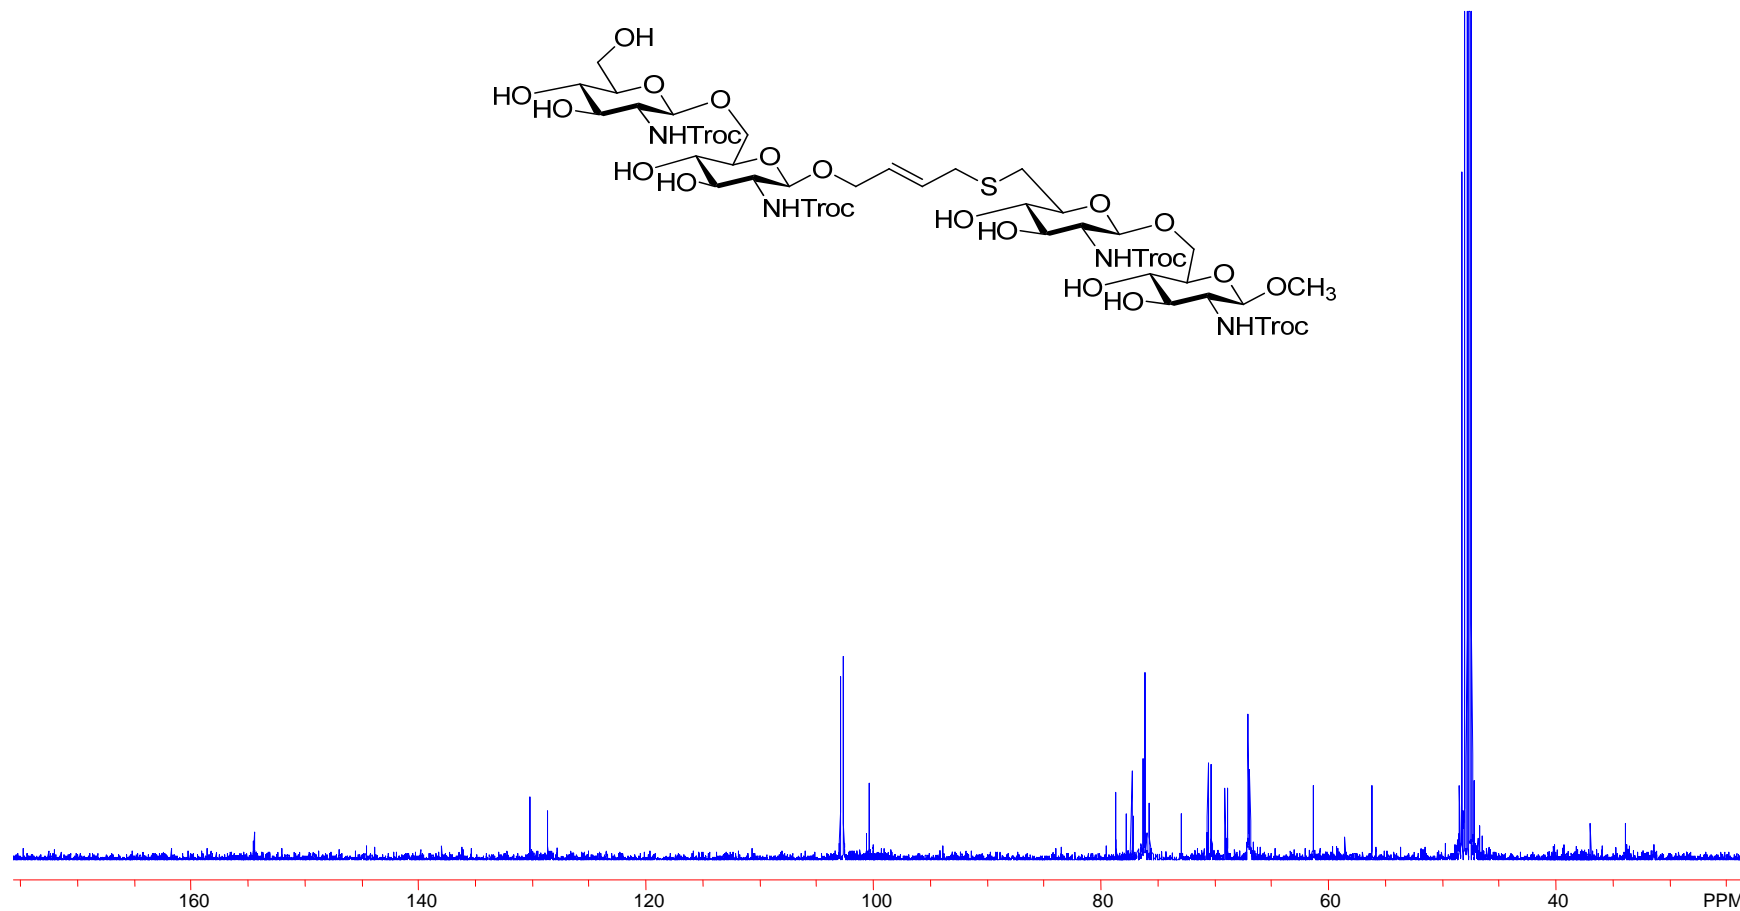

$^1\text{H-NMR}$  spectrum ( $\text{CD}_3\text{OD}$ , 500 MHz) Benzyl 3-deoxy-3-[4-( $\beta$ -D-laminaribiosyloxy)but-2-*E*-enylthio]- $\beta$ -D-laminaribioside (**68**).

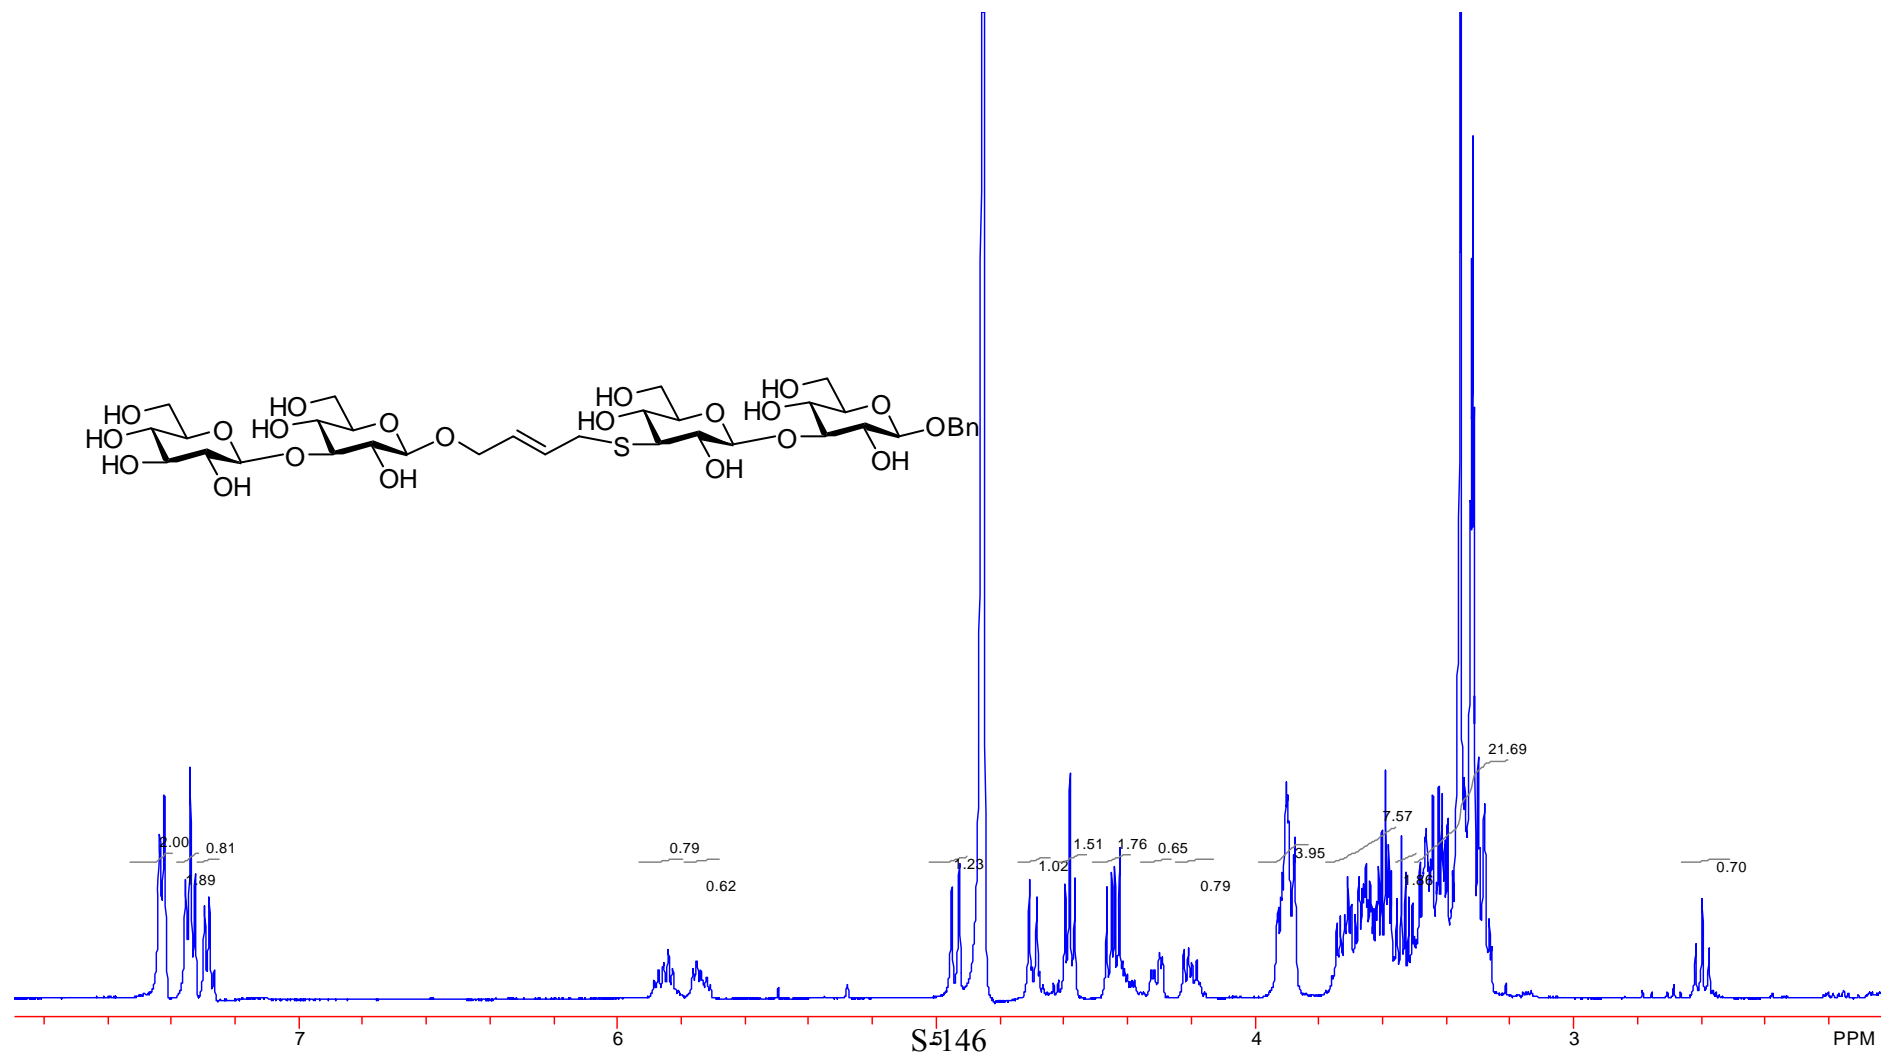

$^{13}\text{C}$ -NMR spectrum ( $\text{CD}_3\text{OD}$ , 125 MHz) Benzyl 3-deoxy-3-[4-( $\beta$ -D-laminaribiosyloxy)but-2-*E*-enylthio]- $\beta$ -D-laminaribioside (**68**).

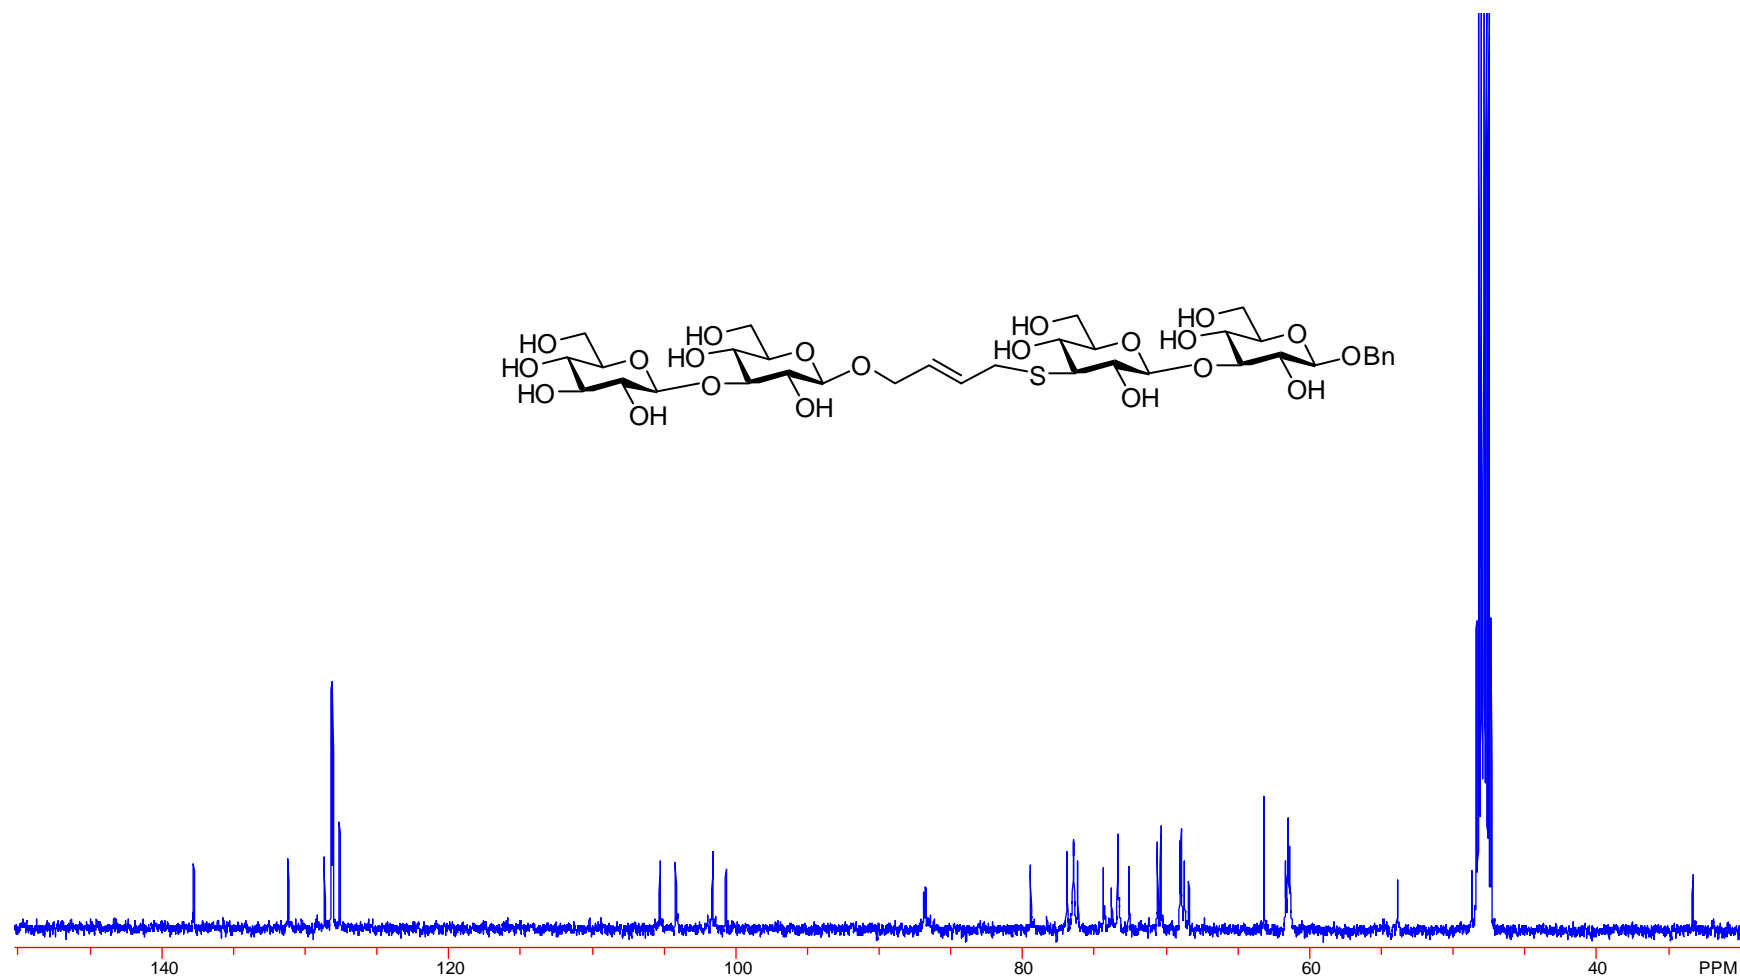

S-147

<sup>1</sup>H-NMR spectrum (CD<sub>3</sub>OD, 500 MHz) Methyl 3-*O*-[4-(1-thio-β-D-laminaribiosyl)but-2-*E*-enyl]-β-D-laminariboside (**69**).

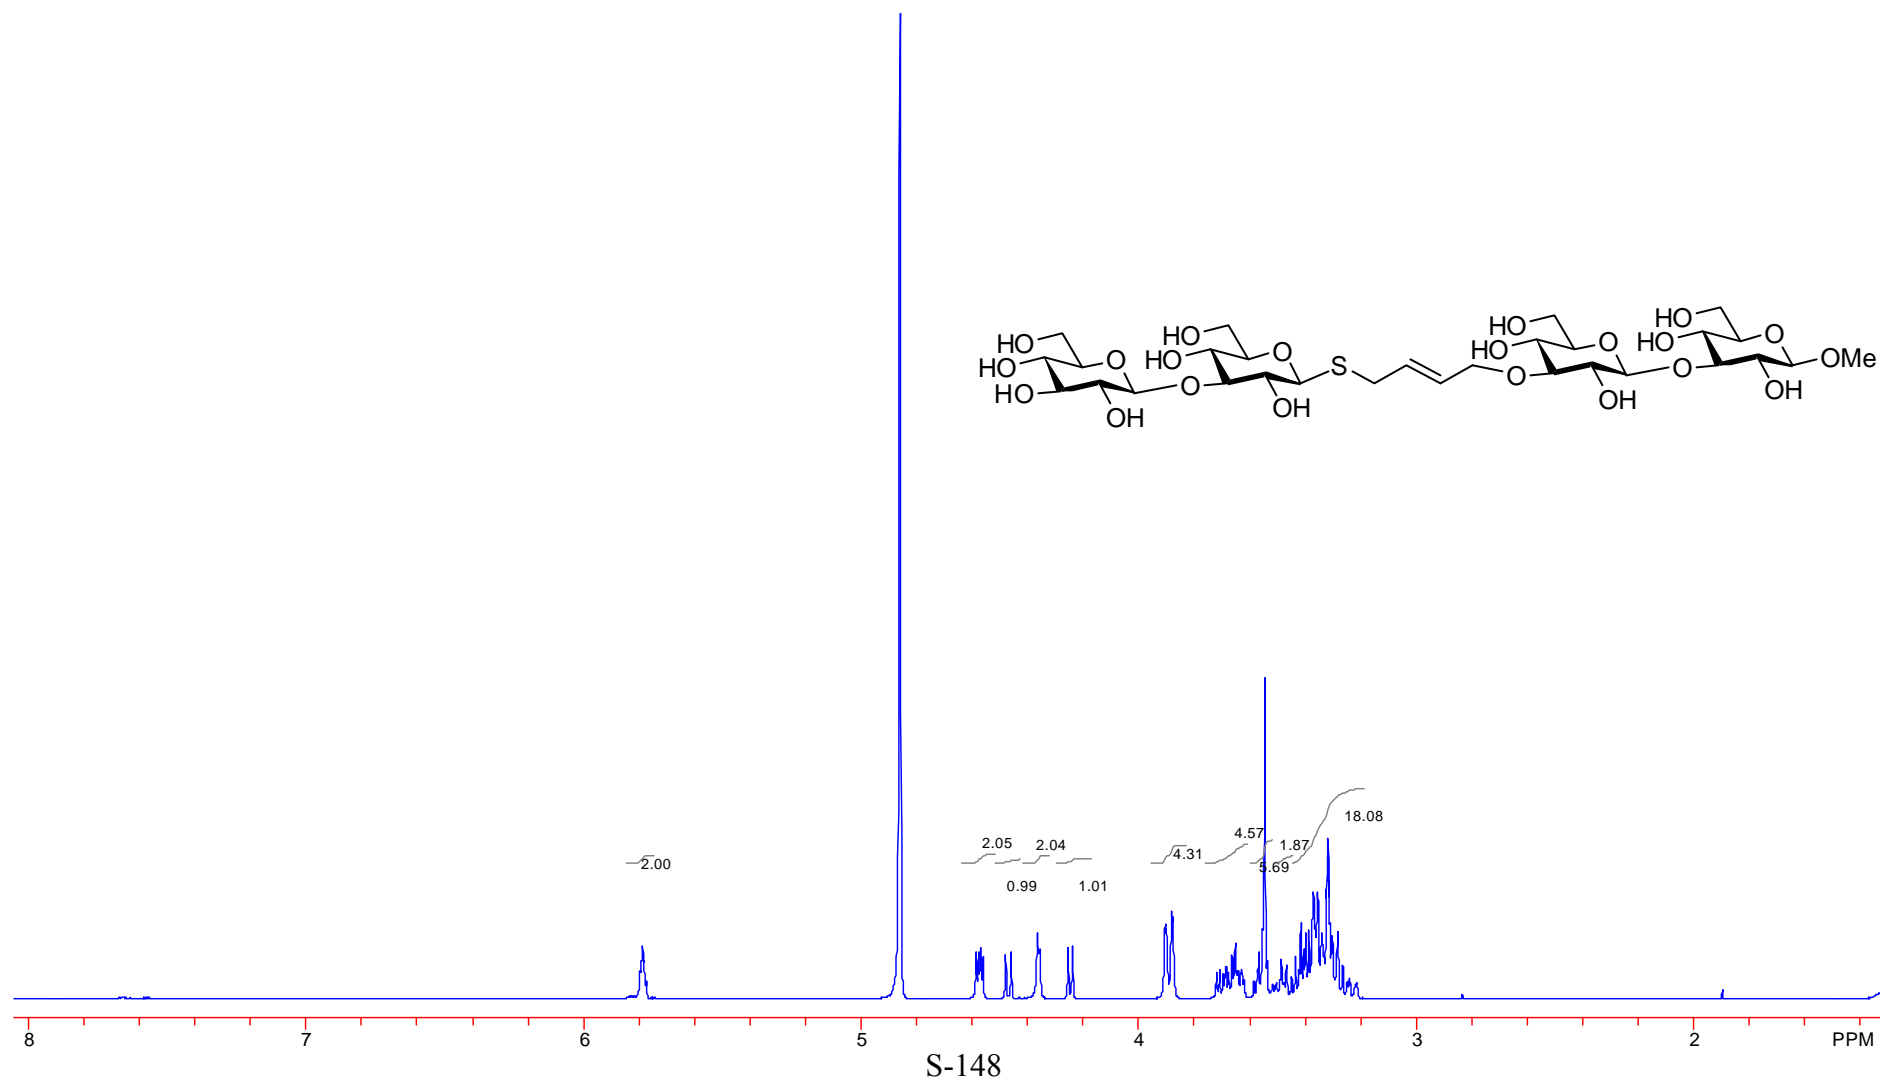

$^{13}\text{C}$ -NMR spectrum ( $\text{CD}_3\text{OD}$ , 125 MHz) Methyl 3-*O*-[4-(1-thio- $\beta$ -D-laminaribiosyl)but-2-*E*-enyl]- $\beta$ -D-laminaribioside (**69**).

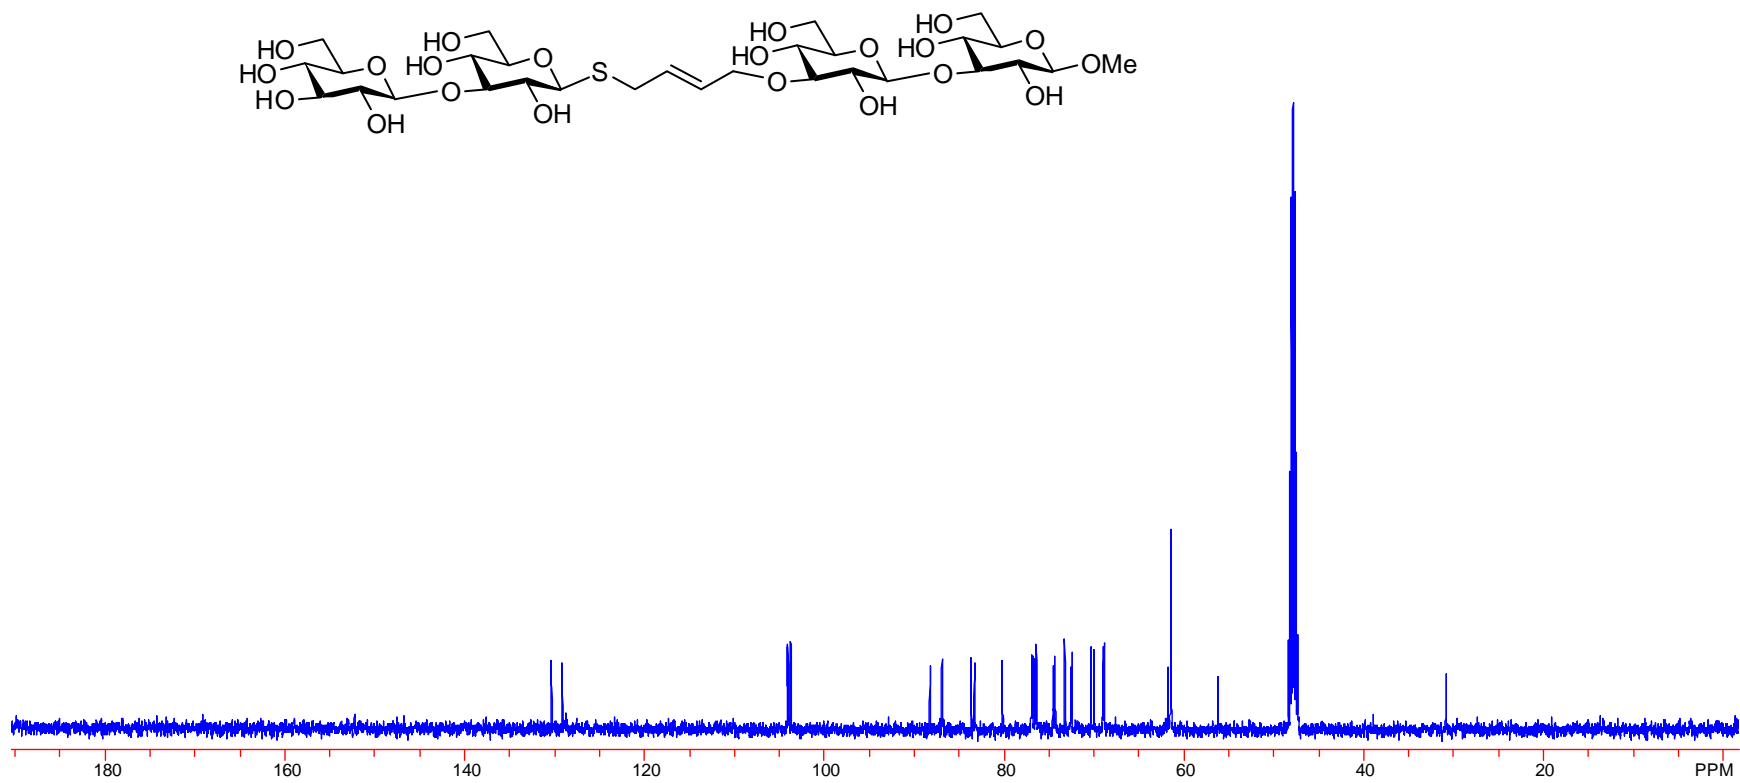

S-149

$^1\text{H-NMR}$  spectrum ( $\text{CD}_3\text{OD}$ , 500 MHz) 4-(1-Thio- $\beta$ -D-laminaribiosyl)but-2-*E*-enyl  $\beta$ -D-laminaribioside (**70**).

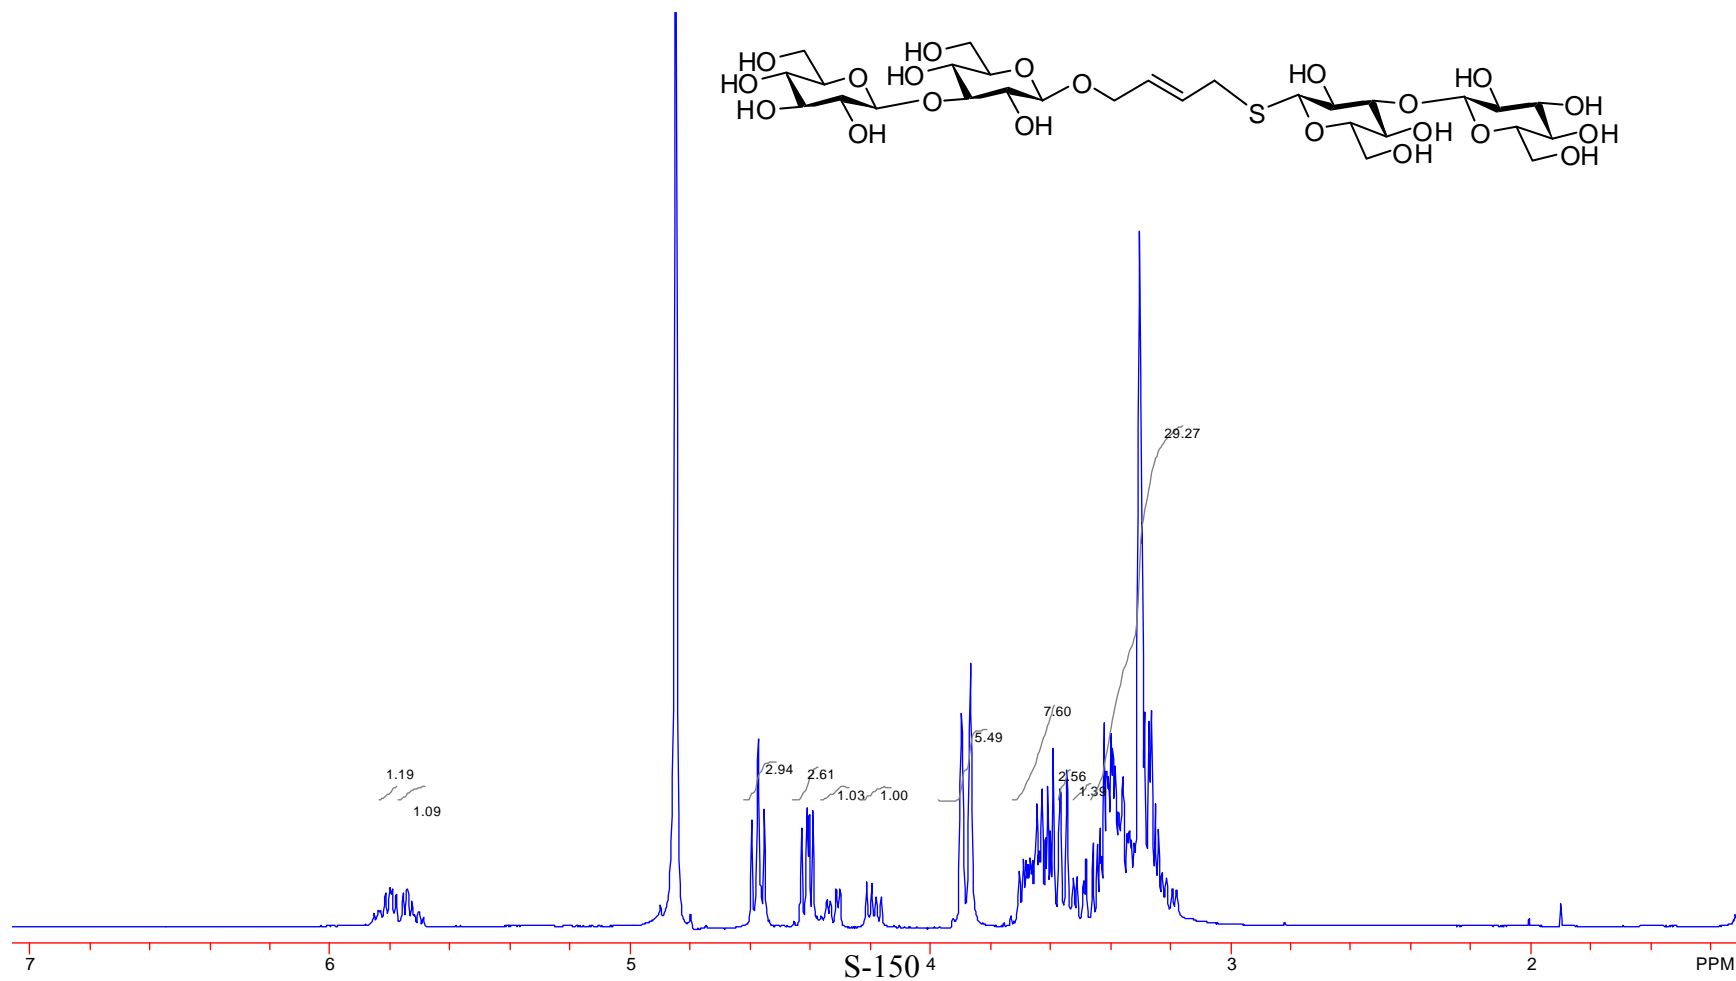

$^{13}\text{C}$ -NMR spectrum ( $\text{CD}_3\text{OD}$ , 125 MHz) 4-(1-Thio- $\beta$ -D-laminaribosyl)but-2-*E*-enyl  $\beta$ -D-laminaribioside (**70**).

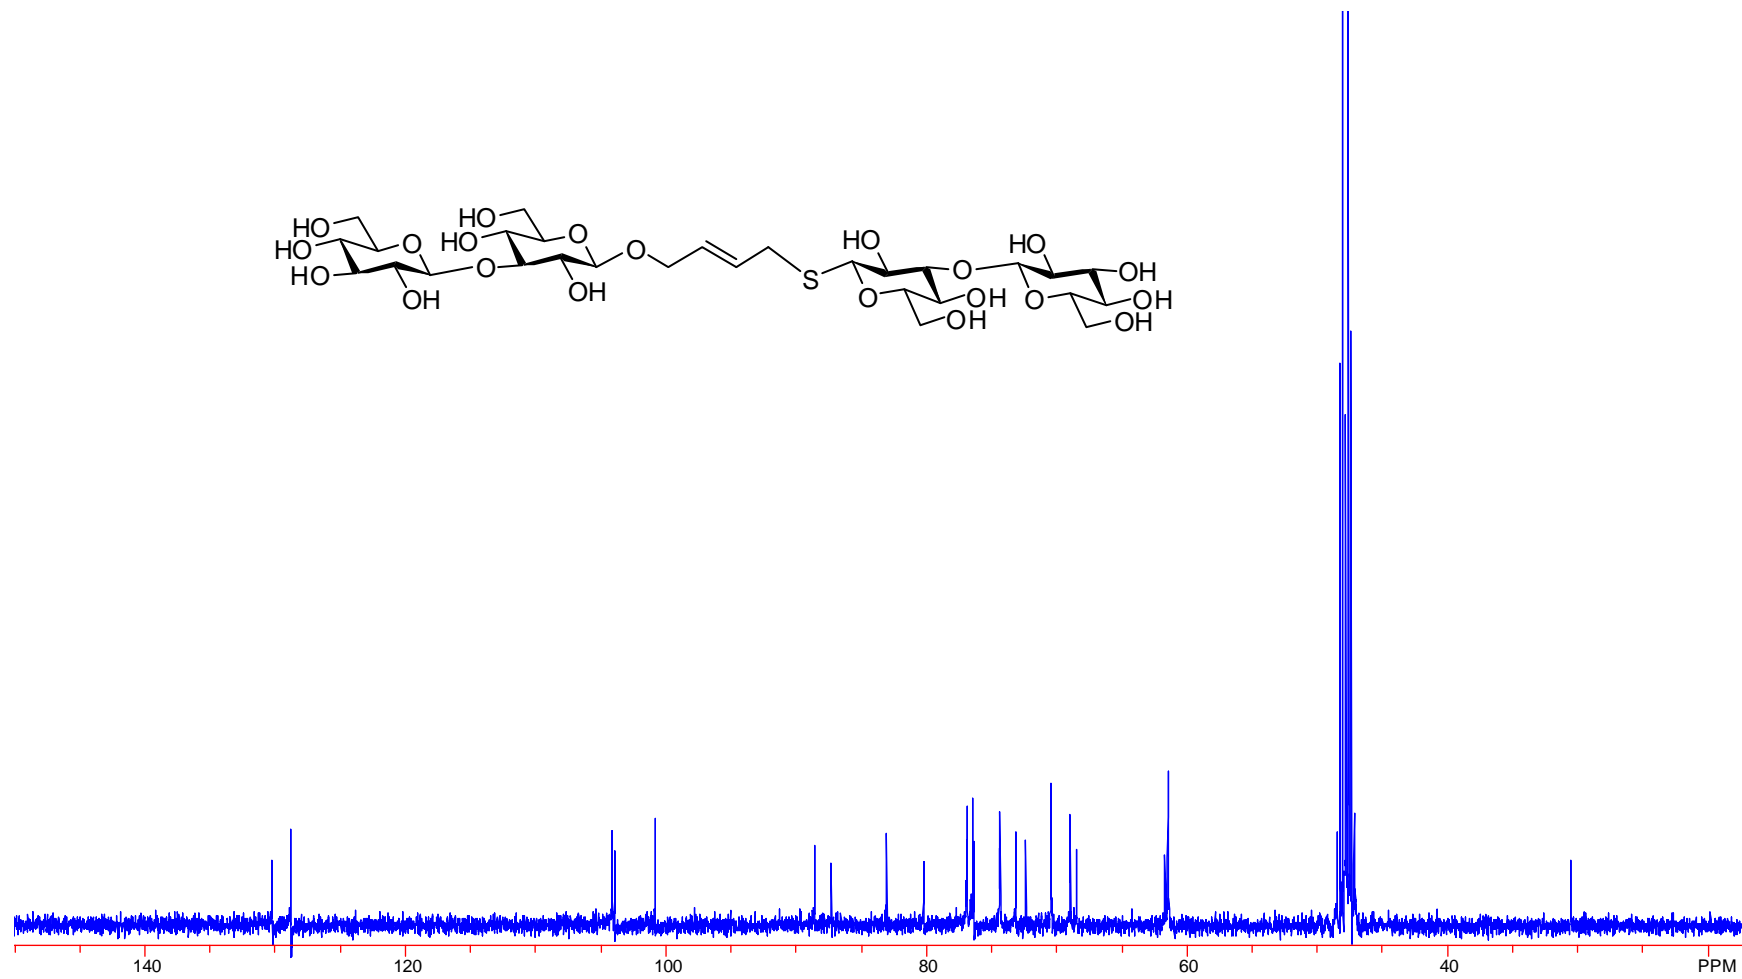

S-151
